# Supplementary material for: Unraveling the cellular origin and clinical prognostic markers of infant B-cell acute lymphoblastic leukemia using genome-wide analysis
Source: PubMed Central journal article supplement — Haematologica. 2019 Jan 24;104(6):1176–88. doi: 10.3324/haematol.2018.206375 (PMC6545849; doi:10.3324/haematol.2018.206375), 2019-06
Supplement: 2018.206375_AGRAZ-DOBLAS_SUPPL.pdf [file 2018.206375_AGRAZ-DOBLAS_SUPPL.pdf]

# Unraveling the cellular origin and clinical prognostic markers of infant B-cell acute lymphoblastic leukemia using genome-wide analysis

Antonio Agraz-Doblas,<sup>1,2</sup> Clara Bueno,<sup>2#</sup> Rachael Bashford-Rogers,<sup>3#</sup> Anindita Roy,<sup>4,#</sup> Pauline Schneider,<sup>5</sup> Michela Bardin,<sup>6</sup> Paola Ballerini,<sup>7</sup> Gianni Cazzaniga,<sup>6</sup> Thaidy Moreno,<sup>1</sup> Carlos Revilla,<sup>1</sup> Marta Gut,<sup>8,9</sup> Maria G. Valsecchi,<sup>10</sup> Irene Roberts,<sup>4,11</sup> Rob Pieters,<sup>5</sup> Paola De Lorenzo,<sup>10</sup> Ignacio Varela,<sup>1,\*,\*</sup> Pablo Menendez<sup>2,12,13,\*,\*</sup> and Ronald W. Stam<sup>5</sup>

<sup>1</sup>Instituto de Biomedicina y Biotecnología de Cantabria (IBBTec), Universidad de Cantabria-CSIC, Santander, Spain; <sup>2</sup>Josep Carreras Leukemia Research Institute-Campus Clinic, Department of Biomedicine, School of Medicine, University of Barcelona, Spain; <sup>3</sup>Department of Medicine, University of Cambridge, Cambridge Biomedical Campus, UK; <sup>4</sup>Department of Paediatrics, University of Oxford, UK; <sup>5</sup>Princess Maxima Center for Pediatric Oncology, Utrecht, the Netherlands; <sup>6</sup>Centro Ricerca Tettamanti, Department of Pediatrics, University of Milano Bicocca, Fondazione MBBM, Monza, Italy; <sup>7</sup>Pediatric Hematology, A. Trousseau Hospital, Paris, France; <sup>8</sup>CNAG-CRG, Center for Genomic Regulation, Barcelona, Spain; <sup>9</sup>Universitat Pompeu Fabra, Barcelona, Spain; <sup>10</sup>Interfant Trial Data Center, University of Milano-Bicocca, Monza, Italy; <sup>11</sup>MRC Molecular Haematology Unit, MRC Weatherall Institute of Molecular Medicine, University of Oxford, UK; <sup>12</sup>Institució Catalana de Recerca i Estudis Avançats (ICREA), Barcelona, Spain and <sup>13</sup>Centro de Investigación Biomédica en Red de Cáncer (CIBERONC), ISCIII, Barcelona, Spain

*#These authors contributed equally to this work.*

*\*These senior authors contributed equally to this work.*

©2019 Ferrata Storti Foundation. This is an open-access paper. doi:10.3324/haematol.2018.206375

Received: September 7, 2018.

Accepted: December 20, 2018.

Pre-published: January 24, 2019.

Correspondence: PABLO MENÉNDEZ - pmenendez@carrerasresearch.org

IGNACIO VARELA - Ignacio.varela@unican.es

## **Whole-exome sequencing (WES) and mutational analysis**

For the discovery cohort (n=50, 42 diagnostics and 8 matching relapses), paired-end whole exome sequencing (WES) was performed on DNA extracted from FACS-purified CD34+CD19+ blasts (purity>95%) at diagnosis. For eight MLL-AF4+ iBCP-ALL patients, DNA was also collected at relapse. Two samples were discarded due to discordant diagnostic-remission SNP genotyping due to previous allogenic stem cell transplantation. We used DNA from patients at complete molecular remission to discriminate somatic from germline mutations. The Agilent Human All Exon 50 Mb v5 Kit was used for the exon-enriched genomic library generation following the manufacturer's instructions. Each library was sequenced on an Illumina HiSeq 2500 instrument using HiSeq PE Cluster Kitv3 with a 2x101 paired-end protocol. Raw sequence (100X coverage, **Figure S1**) data fastq files were subjected to quality control using FastQC v0.11.2 and mapped to the human genome (hg19) using BWA 0.7.3.<sup>1</sup> We used Picard 1.61 to fix-clean the alignment and to mark PCR duplicates reads, and GATK v2.2.8 to perform local realignment around small insertions and deletions (indels).<sup>2</sup> Paired tumor/normal bam files were used to identify putative somatic single nucleotide variants (SNVs) with our in-house written RAMSES<sup>3</sup> algorithm selecting mutations with a confidence score >4 and mutational frequency >0.01. We used PINDEL to detect indels.<sup>4</sup> A minimum of 5 independent reads of the indel and no evidence of it in the control DNA was required to report the indel. Potential germline variants were flagged away using 1000 Genomes mutation database. Functional consequence of mutations was annotated using Ensembl database v73 through the Perl API.<sup>5</sup> We run OncodriveFM software<sup>6</sup> to detect genes with evidence of selective pressure from the analysis. Gene ontology analysis was performed using GOrilla.<sup>7</sup>

Copy number variations (CNVs) were identified by analysing the difference in read depth for each genomic segment between tumoral and matching normal DNA using CopywriteR software.<sup>8</sup>

Confidence for a CNV segment boundary was determined using a series of criteria including length of flanking segments, difference of copy number between neighbouring segments, presence of sequence gaps on the reference genome and the presence of evidence of CNV in the matching germline sample. Regions of loss-of-heterozygosity were estimated using Control-Freec software with a minimal coverage per position of 5 and minimal quality per position of 10.<sup>9</sup> For validation of somatic mutations, DNA was whole-genome amplified using Repli-g Mini kit (Qiagen) and PCR fragments containing the potential mutation were generated for the diagnostic, control and relapsed samples using the FastStart High Fidelity PCR System® (Roche) and ultrasequenced at 30000X in a MiSeq (Illumina). CNV mutations were validated by qPCR using Luminaris Color HiGreen PCR Master Mix (Thermo Fisher).

### **Whole-genome sequencing (WGS)**

Whole-genome sequencing (WGS) was performed in all patients of the discovery cohort (n=50). Briefly short-insert paired-end libraries were prepared with a PCR-free protocol. TruSeq™DNA Sample Preparation Kit v2 (Illumina) and the KAPA Library Preparation kit (Kapa Biosystems) were used with modifications. In brief, 0.5-1.0 µg of genomic DNA was sheared on a Covaris™ instrument, and DNA fragments of 220-550bp were selected using AMPure XP beads (Agencourt, Beckman Coulter). Fragmented DNA was end-repaired, adenylated and ligated to Illumina specific indexed paired-end adaptors. Libraries were sequenced using the TruSeq SBS Kitv3-HS (Illumina) in 2x76 bp protocol on a HiSeq 2500 instrument (Illumina). A minimum of 70 million reads were generated for each sample (**Figure S1**). Sequence data was mapped as described above. Structural variations including inter-chromosomal translocations, intra-chromosomal translocations, inversions, deletions, duplications and insertions were identified with Delly<sup>10</sup> using the default parameters and annotated using Ensembl perl API.<sup>5</sup> Thirty low-coverage sequenced normal genomes from the 1000 Genomes

Project database were used to filter potential false positives. Structural variations were PCR-validated using primers spanning the breakpoint. Sanger sequencing of the PCR products was performed to detect the breakpoint at the base pair level.

### **RNA-sequencing (RNA-Seq)**

RNA-seq was performed in all patients of the discovery cohort at diagnosis (n=42). The RNASeq libraries were prepared from total RNA using the TruSeq™ RNA Sample Prep Kit v2 (Illumina), and were sequenced on HiSeq2500 platform (Illumina) in paired-end mode with a read length of 2x76bp using the TruSeq SBS Kit v3 (**Figure S1**). We generated a mean of 40 million paired-end reads per sample that were aligned to the human genome (hg19) using Tophat.<sup>11</sup> All predicted transcripts were analysed *in-silico* and those missing start or stop codon were filtered out. Differentially expressed genes (DEG) were identified using HTSeq and DESeq.<sup>12,13</sup> Differential expression of RNA transcript levels was performed with R packages and a minimum of 3 counts for a gene in more than two independent samples were required. A fold change >2 with a q-value<0.05 were used to call DEG. Signalling pathway enrichment was analysed using the Gene Set Enrichment Analysis (GSEA) tool.<sup>14</sup> For RNA-Sequencing of FL HSPCs, 100 cells from each subpopulation were FACS-sorted, followed by RNA extraction and amplification, and cDNA library preparation using Nextera Index kit as per protocol. Indexed cDNA libraries were sequenced using Illumina HiSeq2500 to generate 100 and 150bp paired-end reads, yielding >30 million reads per sample. For comparison of FL HSPCs and iBCP-ALL RNASeq data, all FASTQ files were mapped to GRCh38 of the human genome and counted using STAR v2.4.2a<sup>2</sup> and featureCounts v1.5.5-p12.<sup>15,16</sup> Downstream analysis was performed in R (3.4.3) with Limma<sup>17</sup> after accounting for batch effects. To validate RNA-Seq data, reverse transcription was performed using the PrimeScript cDNA Synthesis kit® (Takara) and the mRNA expression of a selected group of genes was performed by qRT-PCR using Luminaris Color

HiGreen qPCR Master Mix with the StepOnePlus RT-PCR system. Relative expression was calculated using the CT method ( $2^{-\Delta CT}$ ). Sequencing data is publicly available at the European Nucleotide Archive under the accession number PRJEB23605.

### **Sequencing and analysis of B-cell receptor (BCR) VDJ repertoires**

Analysis of BCR repertoires was performed as previously described in detail<sup>18</sup>, using standard BIOMED-2primers in n=4 t(4;11)/MLL-AF4+ diagnostic-relapse pairs, n=3 t(1;19)/E2A-PBX1+, n=1 t(12;21)/TEL-AML1+ and n=1 t(9;22)/BCR-ABL+.<sup>19</sup> Briefly, reverse transcription was performed and the cDNA was cleaned-up with Agencourt AMPure XP beads and PCR amplified with V-gene multiplex primer mix and 3' universal reverse primer using KAPA protocol. Primers are provided in **Table S2**. Libraries were prepared using Illumina protocols and sequenced using 300bp paired-ended MiSeq. Raw MiSeq reads were filtered for base quality (median Phred score>32) using QUASR (<http://sourceforge.net/projects/quasr/>).<sup>20</sup> MiSeq forward and reverse reads were merged together if they contained identical overlapping region of >50bp, or otherwise discarded. Universal barcoded regions were identified in reads and orientated to read from V-primer to constant region primer. The barcoded region within each primer was identified and checked for conserved bases. Primers and constant regions were trimmed from each sequence, and sequences were retained only if there was >80% per base sequence similarity between all sequences obtained with the same barcode, otherwise discarded. Sequences were trimmed to give only the region of the sequence corresponding to the variable (V-D-J) regions. Sequences without complete reading frames and non-Ig sequences were removed and only reads with significant similarity to reference IgH and J genes from the IMGT database were retained using BLAST<sup>21</sup> and not shared between unrelated individuals (public BCRs). The network generation algorithm and network properties were calculated as in Bashford-Rogers *et al.*<sup>22</sup> Each vertex represents a unique sequence, where relative vertex size is proportional to the

number of identical reads. Edges join vertices that differ by single nucleotide non-indel differences and clusters are collections of related, connected vertices.

## **References**

1. Li H, Durbin R. Fast and accurate short read alignment with Burrows–Wheeler transform. *Bioinformatics* 2009;25(14):1754–176010.
2. McKenna A, Hanna M, Banks E, et al. The genome analysis toolkit: A MapReduce framework for analyzing next-generation DNA sequencing data. *Genome Res* 2010;20(9):1297–1303.
3. Martínez N, Almaraz C, Vaqué JP, et al. Whole-exome sequencing in splenic marginal zone lymphoma reveals mutations in genes involved in marginal zone differentiation. *Leukemia* 2014;28(6):1334–1340.
4. Ye K, Schulz MH, Long Q, Apweiler R, Ning Z. Pindel: A pattern growth approach to detect break points of large deletions and medium sized insertions from paired-end short reads. *Bioinformatics* 2009;25(21):2865–2871.
5. Aken BL, Ayling S, Barrell D, et al. The Ensembl gene annotation system. *Database* 2016;20161–19.
6. Gonzalez-Perez A, Lopez-Bigas N. Functional impact bias reveals cancer drivers. *Nucleic Acids Res*;40(21):.
7. Eden E, Navon R, Steinfeld I, Lipson D, Yakhini Z. GOrilla: A tool for discovery and visualization of enriched GO terms in ranked gene lists. *BMC Bioinformatics*;10.
8. Kuilman T, Velds A, Kemper K, et al. CopywriteR: DNA copy number detection from off-target sequence data. *Genome Biol* 2015;16(1):49.
9. Boeva V, Popova T, Bleakley K, et al. Control-FREEC: a tool for assessing copy number and allelic content using next-generation sequencing data. *Bioinformatics* 2012;28(3):423–5.
10. Rausch T, Zichner T, Schlattl A, Stütz AM, Benes V, Korbel JO. DELLY: Structural variant

discovery by integrated paired-end and split-read analysis. *Bioinformatics* 2012;28(18):333–339.

11. Kim D, Pertea G, Trapnell C, Pimentel H, Kelley R, Salzberg SL. TopHat2: Accurate alignment of transcriptomes in the presence of insertions, deletions and gene fusions. *Genome Biol* 2013;14(4):R36.
12. Anders S, Pyl PT, Huber W. HTSeq-A Python framework to work with high-throughput sequencing data. *Bioinformatics* 2015;31(2):166–169.
13. Anders S, Huber W. Differential expression analysis for sequence count data. *Genome Biol* 2010;11(10):R106.
14. Subramanian A, Tamayo P, Mootha VK, et al. Gene set enrichment analysis: A knowledge-based approach for interpreting genome-wide expression profiles. *Proc Natl Acad Sci* 2005;102(43):15545–15550.
15. Dobin A, Davis CA, Schlesinger F, et al. STAR: Ultrafast universal RNA-seq aligner. *Bioinformatics* 2013;29(1):15–21.
16. Liao Y, Smyth GK, Shi W. FeatureCounts: An efficient general purpose program for assigning sequence reads to genomic features. *Bioinformatics* 2014;30(7):923–930.
17. Ritchie ME, Phipson B, Wu D, et al. Limma powers differential expression analyses for RNA-sequencing and microarray studies. *Nucleic Acids Res* 2015;43(7):e47.
18. Bashford-Rogers RJM, Nicolaou KA, Bartram J, et al. Eye on the B-ALL: B-cell receptor repertoires reveal persistence of numerous B-lymphoblastic leukemia subclones from diagnosis to relapse. *Leukemia* 2016;30(12):2312–2321.
19. van Dongen JJM, Langerak AW, Brüggemann M, et al. Design and standardization of PCR primers and protocols for detection of clonal immunoglobulin and T-cell receptor gene recombinations in suspect lymphoproliferations: Report of the BIOMED-2 concerted action BMH4-CT98-3936. *Leukemia* 2003;17(12):2257–2317.
20. Watson SJ, Welkers MRA, Depledge DP, et al. Viral population analysis and minority-variant detection using short read next-generation sequencing. *Philos Trans R Soc B Biol Sci*

2013;368(1614):20120205–20120205.

21. Altschul SF, Gish W, Miller W, Myers EW, Lipman DJ. Basic local alignment search tool. *J Mol Biol* 1990;215(3):403–10.
22. Bashford-Rogers RJM, Palser AL, Huntly BJ, et al. Network properties derived from deep sequencing of human b-cell receptor repertoires delineate b-cell populations. *Genome Res* 2013;23(11):1874–1884.
23. Miller CA, McMichael J, Dang HX, et al. Visualizing tumor evolution with the fishplot package for R. *BMC Genomics* 2016;17(1):880.



# Supplementary Figures

## Table of Contents

|                                                                                                                                                                                                                                 |                           |
|---------------------------------------------------------------------------------------------------------------------------------------------------------------------------------------------------------------------------------|---------------------------|
| <a href="#"><u>Suppl. Figure 1. Summary of coverage and number of reads.....</u></a>                                                                                                                                            | <a href="#"><u>2</u></a>  |
| <a href="#"><u>Suppl. Figure 2. Mutational load in childhood cancers.....</u></a>                                                                                                                                               | <a href="#"><u>4</u></a>  |
| <a href="#"><u>Suppl. Figure 3. Summary of functional and molecular distribution of mutations and mutational signature analysis in the MLL-AF4 subgroup.....</u></a>                                                            | <a href="#"><u>5</u></a>  |
| <a href="#"><u>Suppl. Figure 4. Circos plots of MLLr at diagnosis.....</u></a>                                                                                                                                                  | <a href="#"><u>6</u></a>  |
| <a href="#"><u>Suppl. Figure 5. Clinical correlation between the presence of RAS mutations and disease outcome.....</u></a>                                                                                                     | <a href="#"><u>9</u></a>  |
| <a href="#"><u>Suppl. Figure 6. Genomic instability at relapse.....</u></a>                                                                                                                                                     | <a href="#"><u>10</u></a> |
| <a href="#"><u>Suppl. Figure 7. RNA-Seq expression of genes previously reported to define a MLLr or MLL-AF4+ BCP-ALL.....</u></a>                                                                                               | <a href="#"><u>11</u></a> |
| <a href="#"><u>Suppl. Figure 8. Venn Diagram of global transcriptional activation nature of MLL fusions.....</u></a>                                                                                                            | <a href="#"><u>12</u></a> |
| <a href="#"><u>Suppl. Figure 9. Heatmap representation of the most significant deregulated pathways identified by GSEA in the three infant iBCP-ALL subgroups as compared to normal FL-derived B-cell progenitors. ....</u></a> | <a href="#"><u>13</u></a> |
| <a href="#"><u>Suppl. Figure 10. qRT-PCR validation of the indicated genes observed in our RNA-Seq.....</u></a>                                                                                                                 | <a href="#"><u>14</u></a> |

**Suppl. Figure 1. Summary of coverage and number of reads.**

(A) Coverage per patient for whole-exome sequencing. (B) Number of reads generated in RNA sequencing. (C) Number of reads generated in whole-genome sequencing. Samples are grouped according to the specific MLL translocation (MLL-AF4 in blue, MLL-AF9 in red and MLLwt in green). Black bars represent the reference control samples (CD34<sup>+</sup> CD19<sup>+</sup> B-cell progenitors) in RNAseq. In exome-data experiment, for each patient the sequencing data generated at diagnosis (light color) and remission samples (dark color) are shown. Relapses are indicated in grey. Orange areas in (C) represent the number of PCR duplicates.

**A**

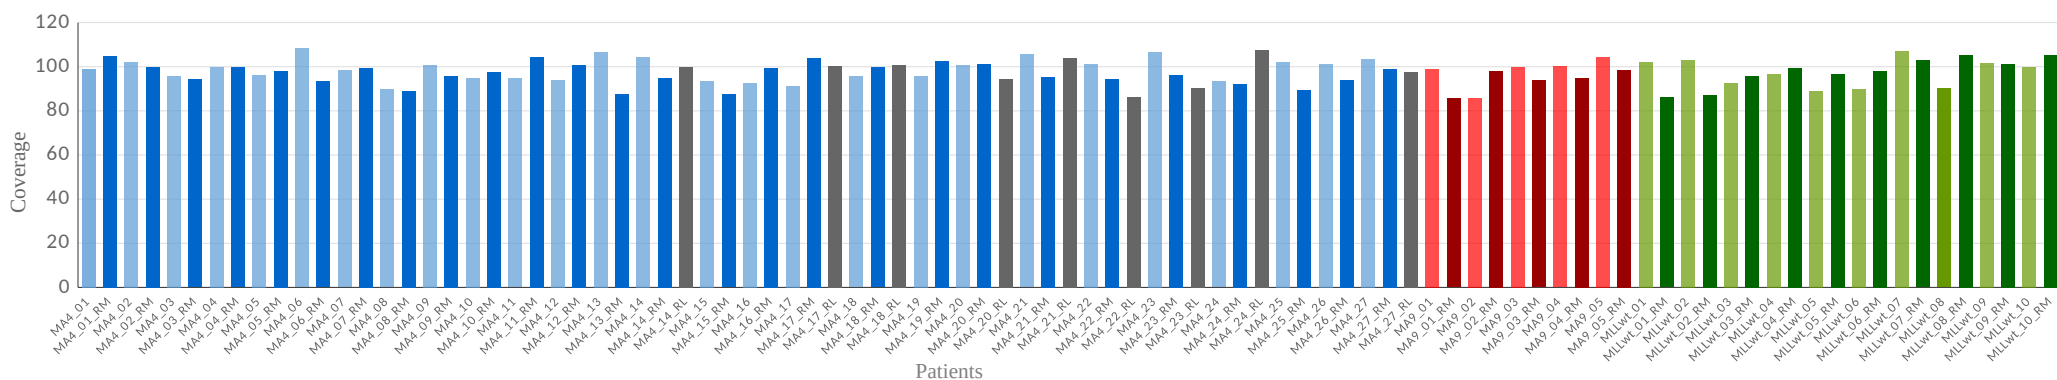

**B**

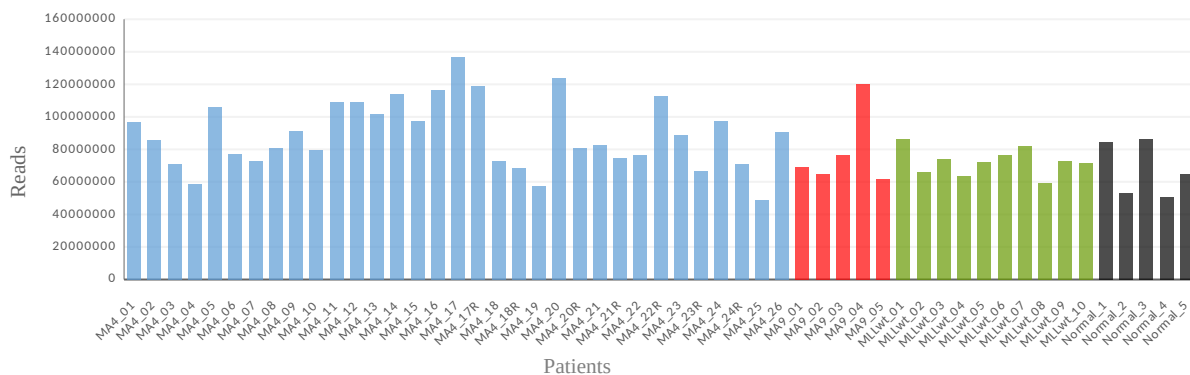

C

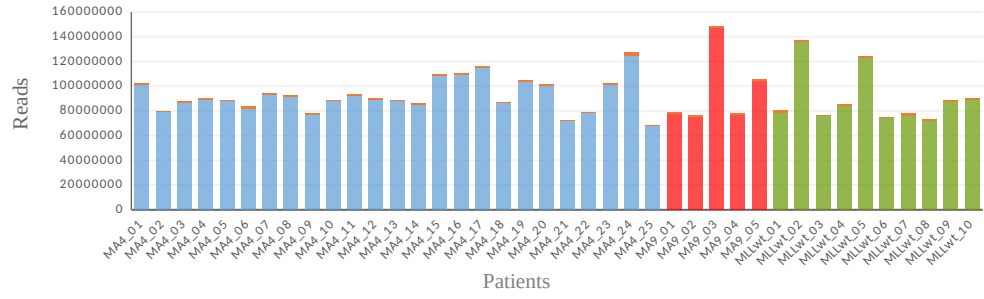

## Suppl. Figure 2. Mutational load in childhood cancers.

Comparison of the mutational load across 24 different cancer cohorts (Grobner SN *et al*, Nature, 2018) revealing that iBCP-ALL represents the cancer type with the most stable genome (2.5 mutations per genome). Burkitt's lymphoma (BL) is the highest mutated childhood cancer with an average of 70 mutations per genome.

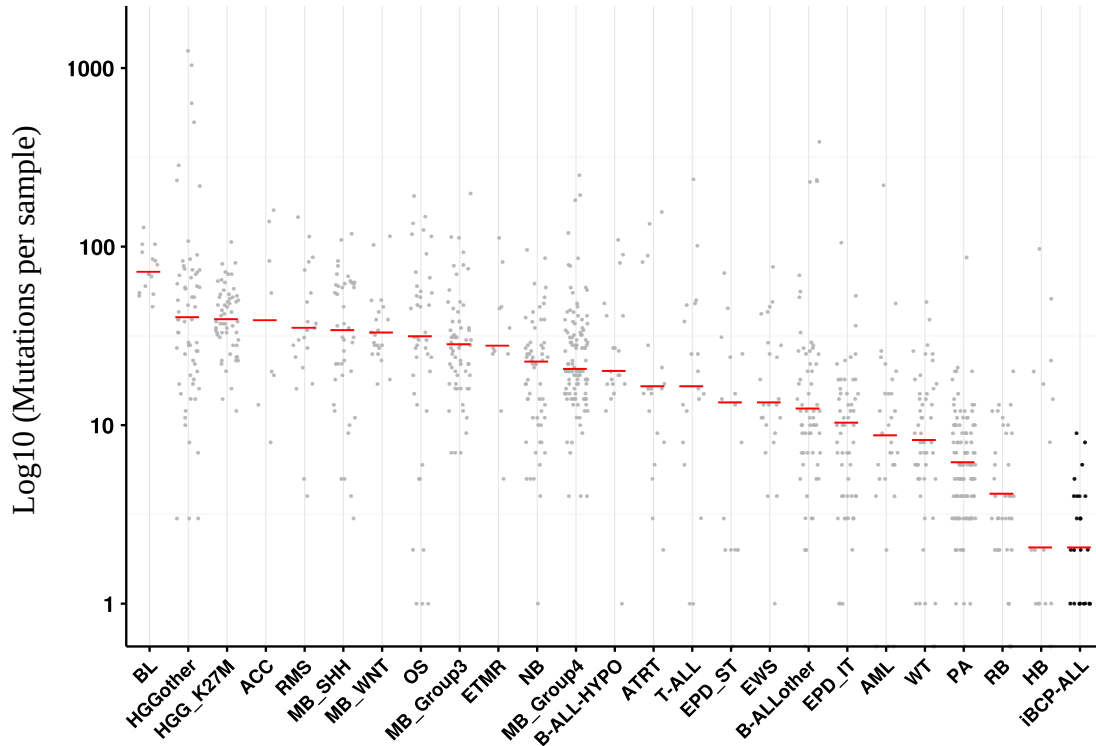

|             |                                                                       |
|-------------|-----------------------------------------------------------------------|
| BL          | Burkitt's Lymphoma                                                    |
| HGG         | High grade glioma                                                     |
| ACC         | Adrenocortical carcinoma                                              |
| RMS         | Rhabdomyosarcoma                                                      |
| MB          | Medulloblastoma                                                       |
| OS          | Osteosarcoma                                                          |
| ETMR        | Embryonal tumor with multilayered rosettes                            |
| NB          | Neuroblastoma                                                         |
| B-ALL-Hypo  | Hypodiploide B-ALL                                                    |
| ATRT        | Atypical teratoid rhabdoid tumor                                      |
| T-ALL       | T cell ALL                                                            |
| EPD         | Ependynoma infratentorial                                             |
| EWS         | Ewing's sarcoma                                                       |
| B-ALL other | B-other ALL (absence of numeric/structural chromosomal abnormalities) |
| AML         | Acute Myeloid Leukemia                                                |
| WT          | Wilms tumor                                                           |
| PA          | Pilocytic astrocytoma                                                 |
| RB          | Retinoblastoma                                                        |
| HB          | Hepatoblastoma                                                        |

**Suppl. Figure 3. Summary of functional and molecular distribution of mutations and mutational signature analysis in the MLL-AF4 subgroup.**

A) Distribution of mutations by functional consequence. B) Distribution of mutations according to the specific base mutation. C) Significant enrichment score of signature 1 in diagnosis according to the mutational signatures described by Alexandrov et al. (Alexandrov LB, Nik-Zainal S, Wedge DC, et al. Signatures of mutational processes in human cancer. *Nature*. 2013;500:415–21.) based on 7000 cancer genomes. This signature is associated with a spontaneous deamination of 5-methylcytosine and very few indels. In addition, this signature is associated with a small number of insertions and deletions.

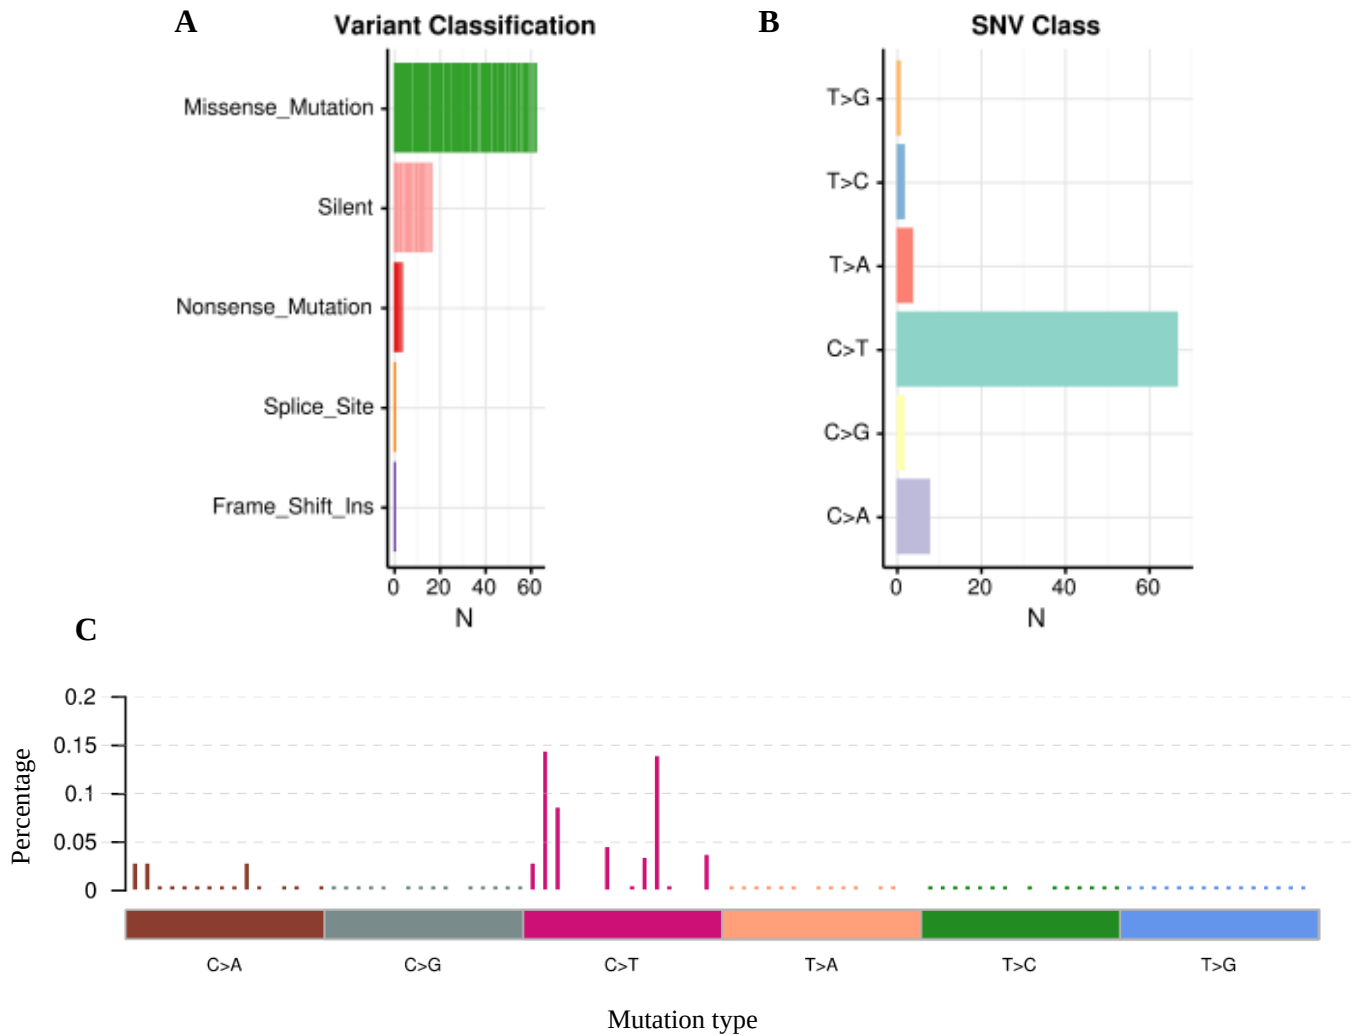

### Suppl. Figure 4. Circos plots of MLLr at diagnosis.

Representation of the total number of mutations identified at diagnosis for each patient. Copy number alterations (blue:gains, red:losses) are represented in the outer grey circle. Gene mutations (both SNVs and indels) are represented in the centre of the circle next to the name of the gene affected. Genomic chromosomal rearrangements are represented with orange lines connecting both breakpoints. Gene symbols: Red=Missense mutations; Green=Silent mutations; Purple=Nonsense,stop-lost/splice-site. Brown=*MLL* and *AF4*.

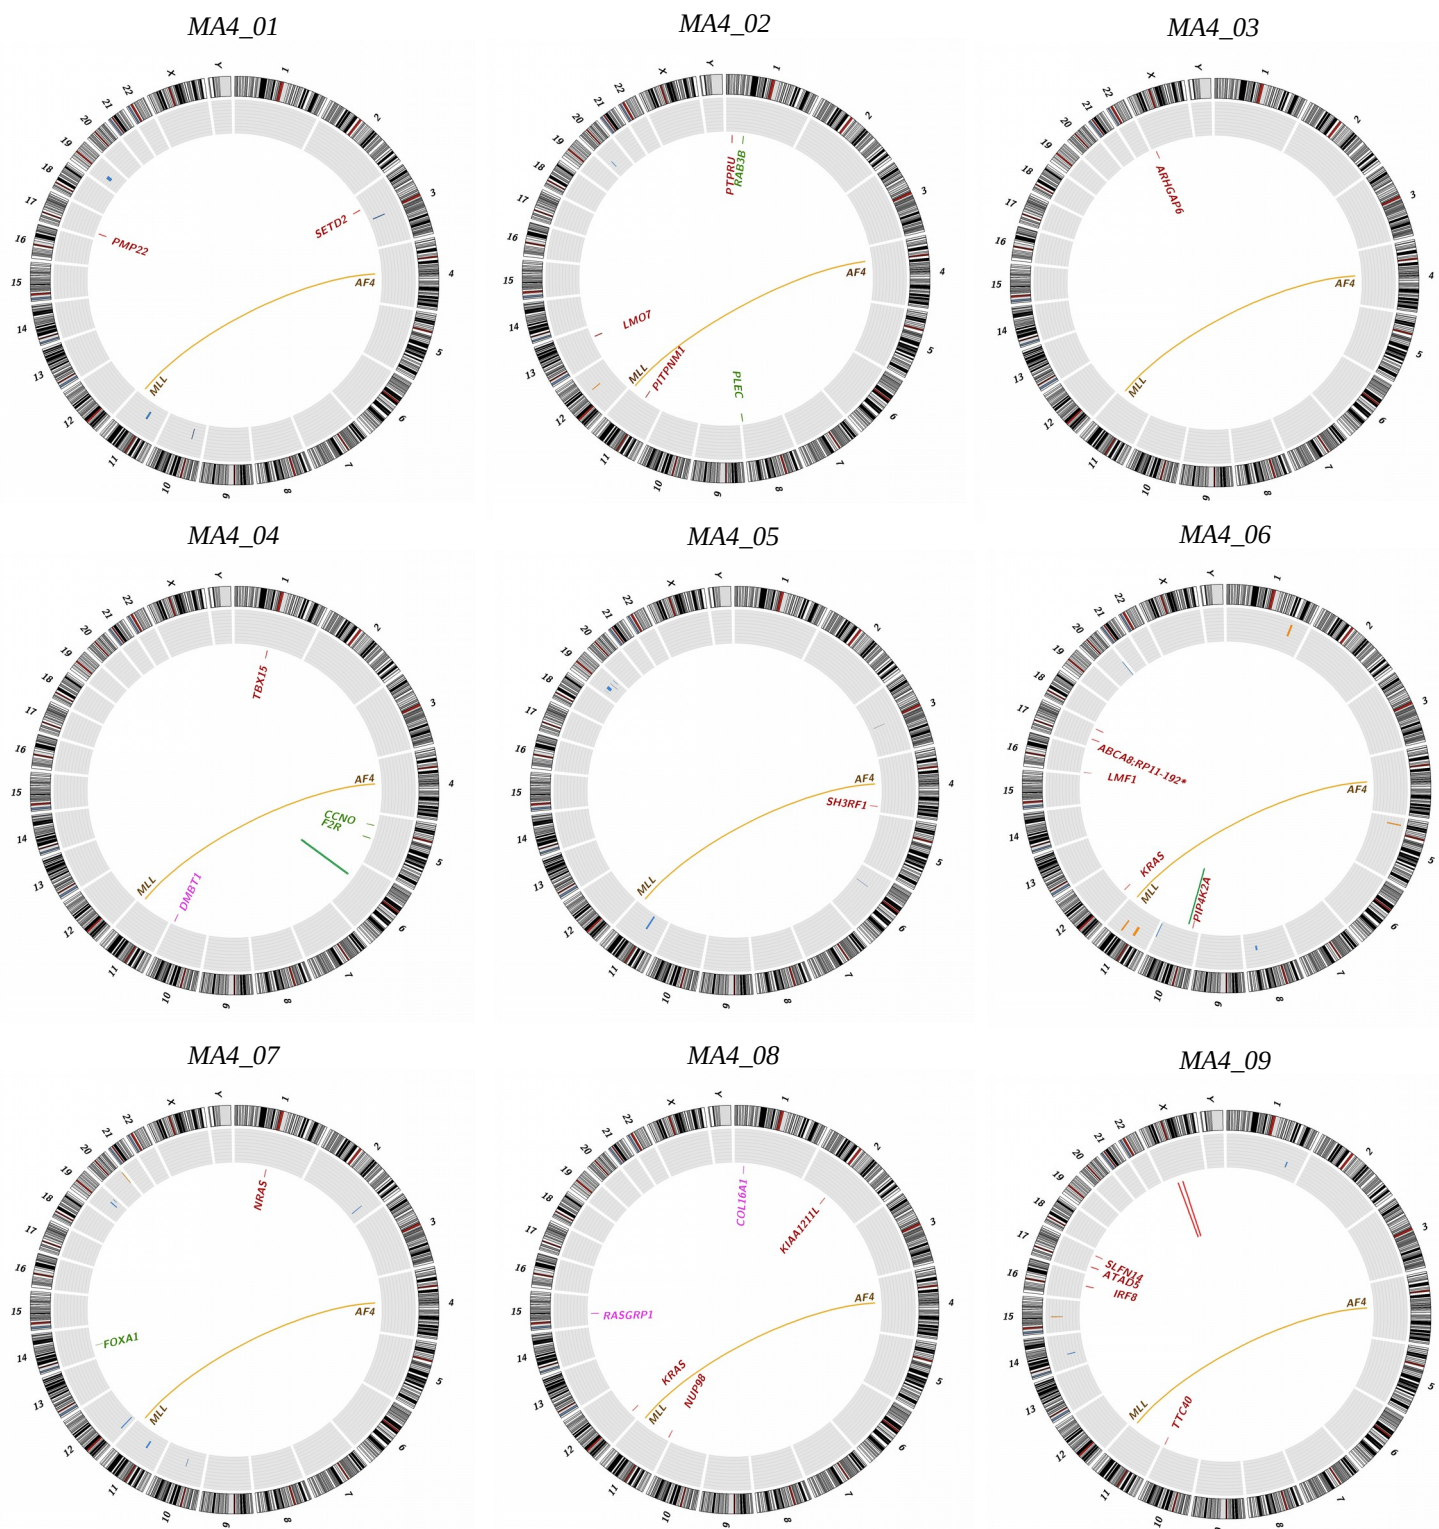

MA4\_10

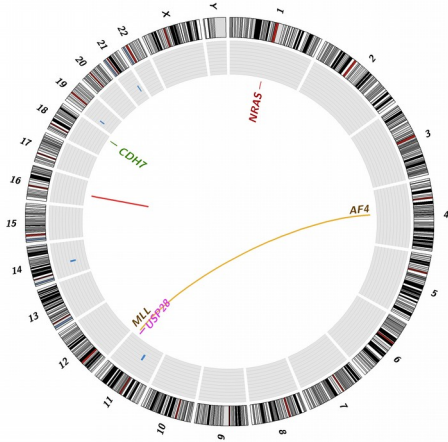

MA4\_11

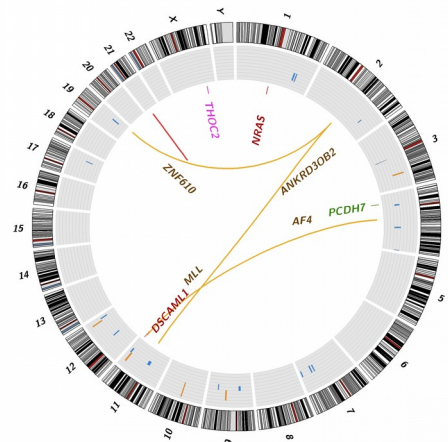

MA4\_12

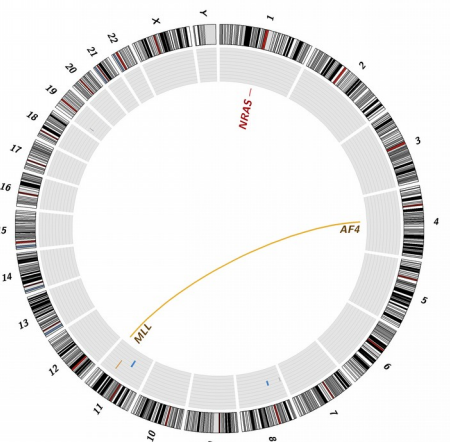

MA4\_13

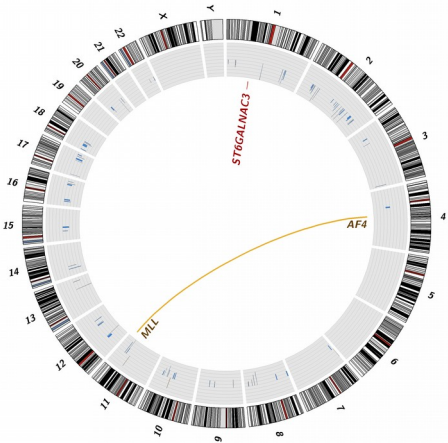

MA4\_14

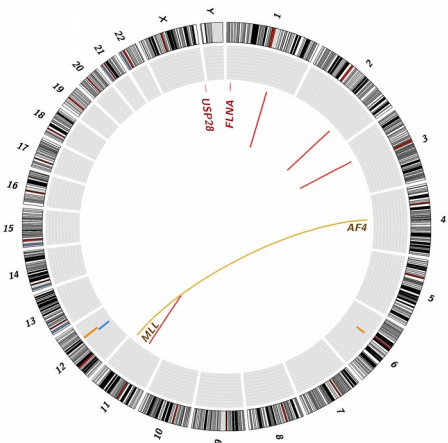

MA4\_15

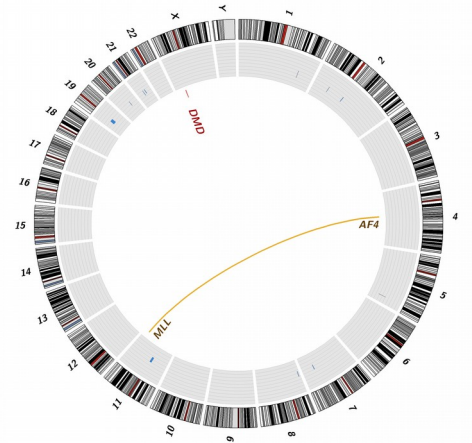

MA4\_16

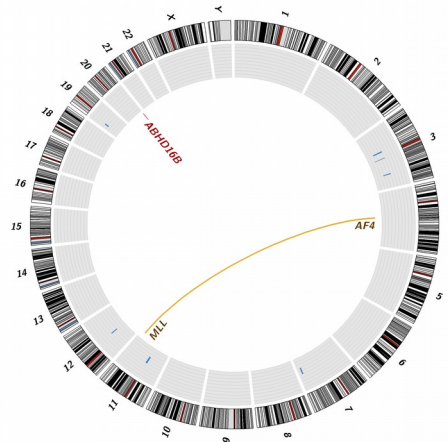

MA4\_17

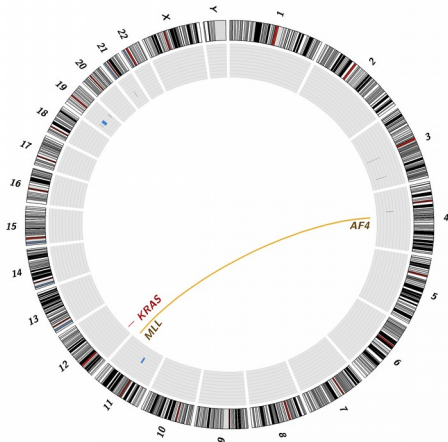

MA4\_18

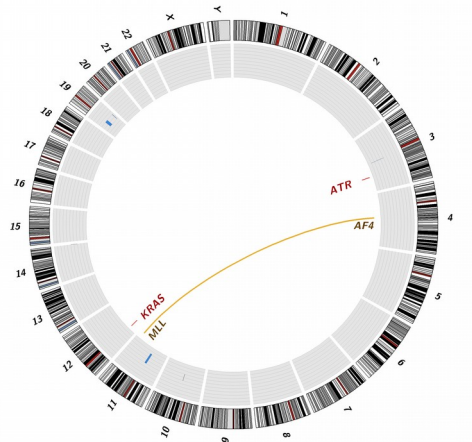



MA4\_19

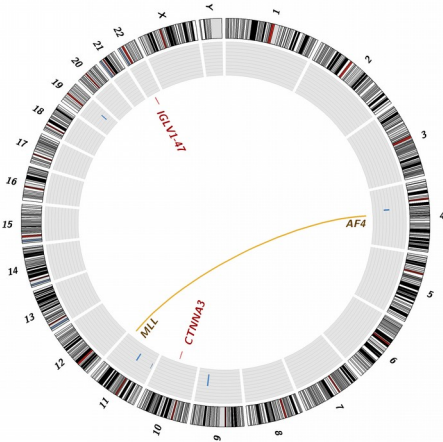

MA4\_20

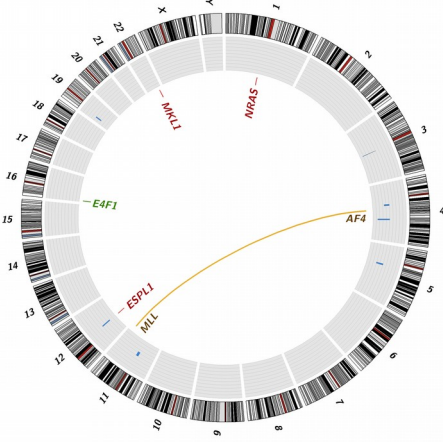

MA4\_21

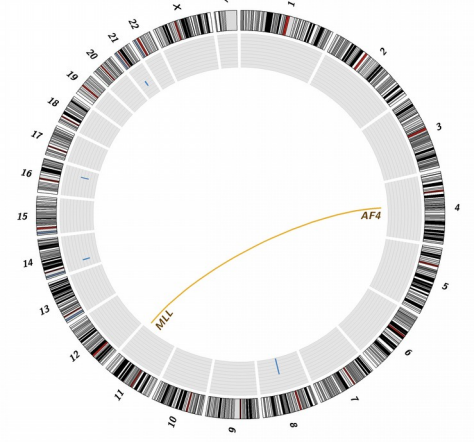

MA4\_22

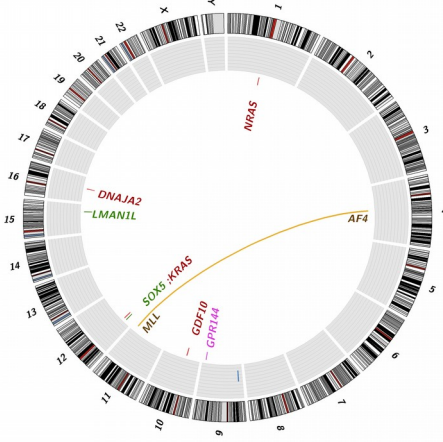

MA4\_23

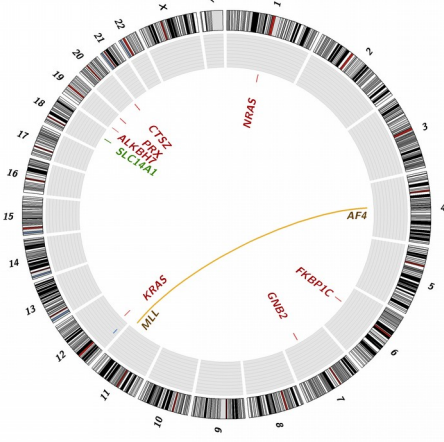

MA4\_24

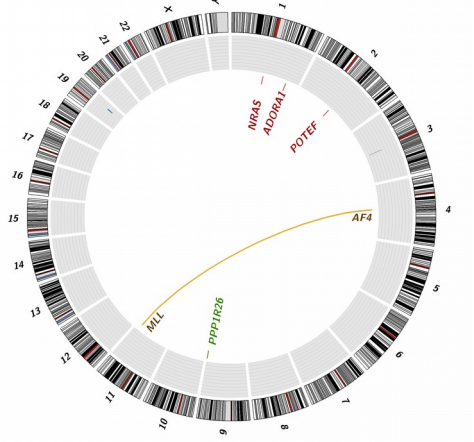

MA4\_25

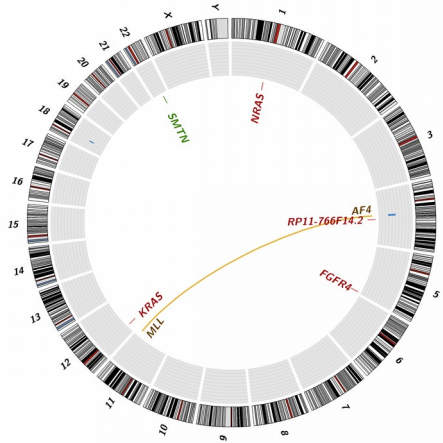



**Suppl. Figure 5. Clinical correlation between the presence of RAS mutations and disease outcome.**

(A) Kaplan-Meier plots for overall survival (top panel) and disease free survival (bottom panel). (B) The presence of mutated RAS has no impact on gender, patient age, white blood cells (WBC)/blasts counts.

**A**

**OVERALL SURVIVAL**

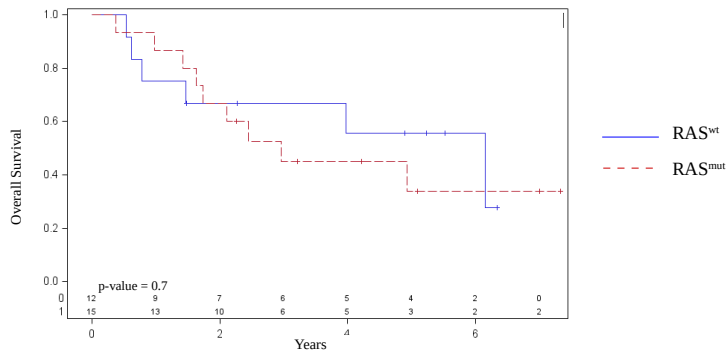

**B**

**GENDER**

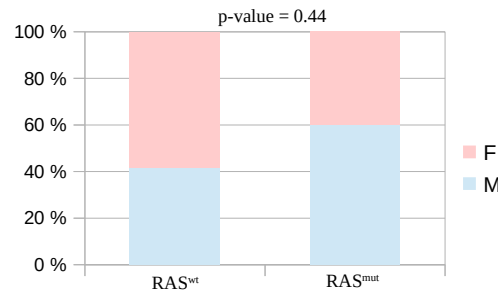

**AGE**

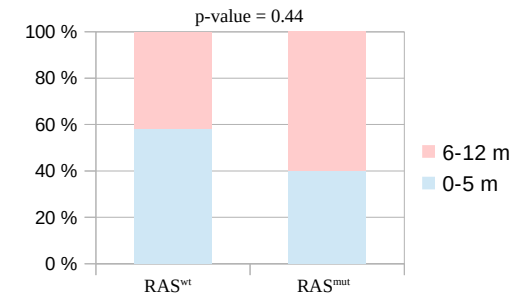

**EVENT FREE SURVIVAL**

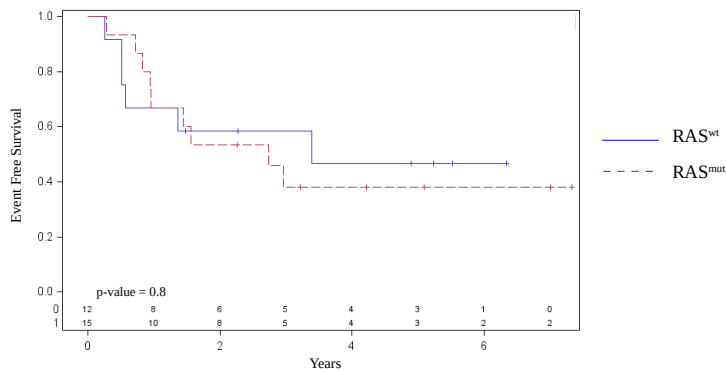

**WBC**

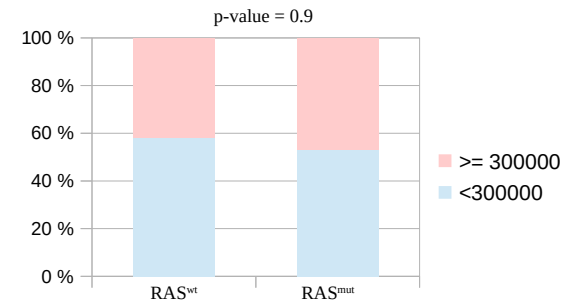

**Suppl. Figure 6. Genomic instability at relapse.**

A) Mutational signature analysis in the MLL-AF4 subgroup at relapse. Significant enrichment score in signature 6 in relapses according to the mutational signatures described by Alexandrov et al. (Alexandrov LB, Nik-Zainal S, Wedge DC, et al. Signatures of mutational processes in human cancer. *Nature*. 2013;500:415–21.) based on 7000 cancer genomes. This signature is associated with defective DNA mismatch repair found in unstable tumours and with high number of small (shorter than 3 bp) insertions and deletions.

B) Correlation between the number of mutations and time-to-relapse for the n=8 MLL-AF4+ relapses.

**A**

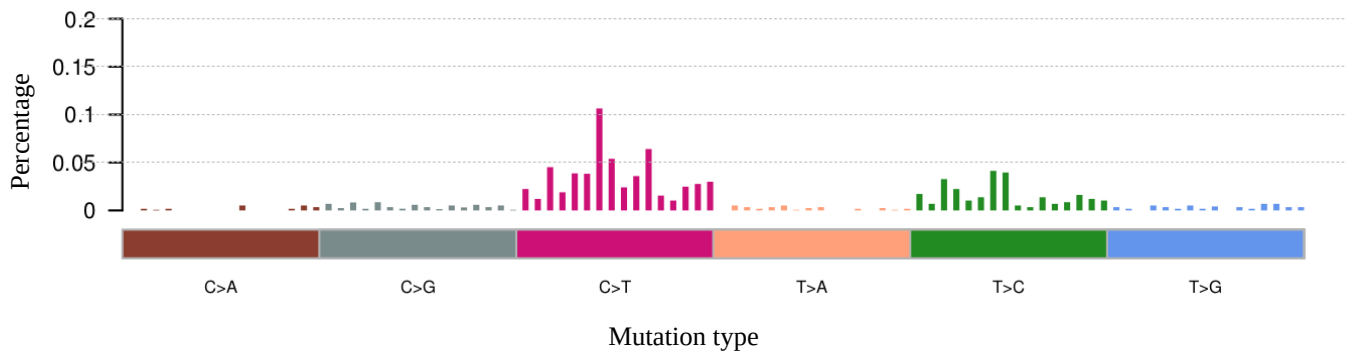

**B**

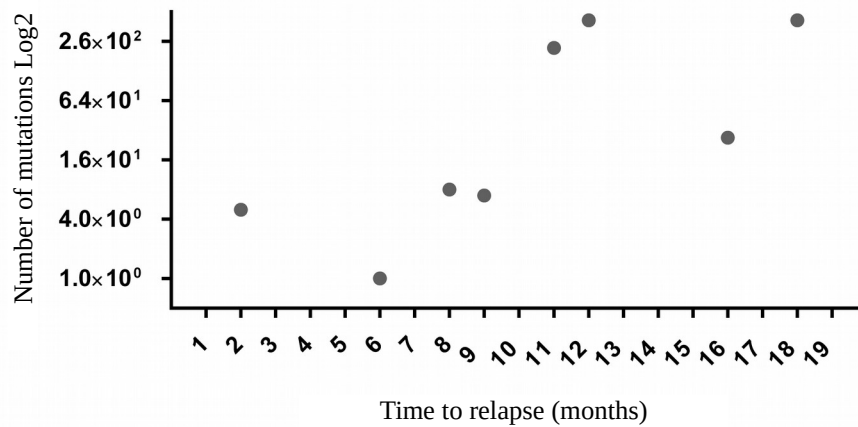

Suppl. Figure 7. RNA-Seq expression of genes previously reported to define a MLLr or MLL-AF4+ BCP-ALL (Ronald W. Stam *et al*, Blood, 2010).

Gene expression associated to MLLr infant BCP-ALL

Gene expression associated to infant MLL-AF4+ BCP-ALL

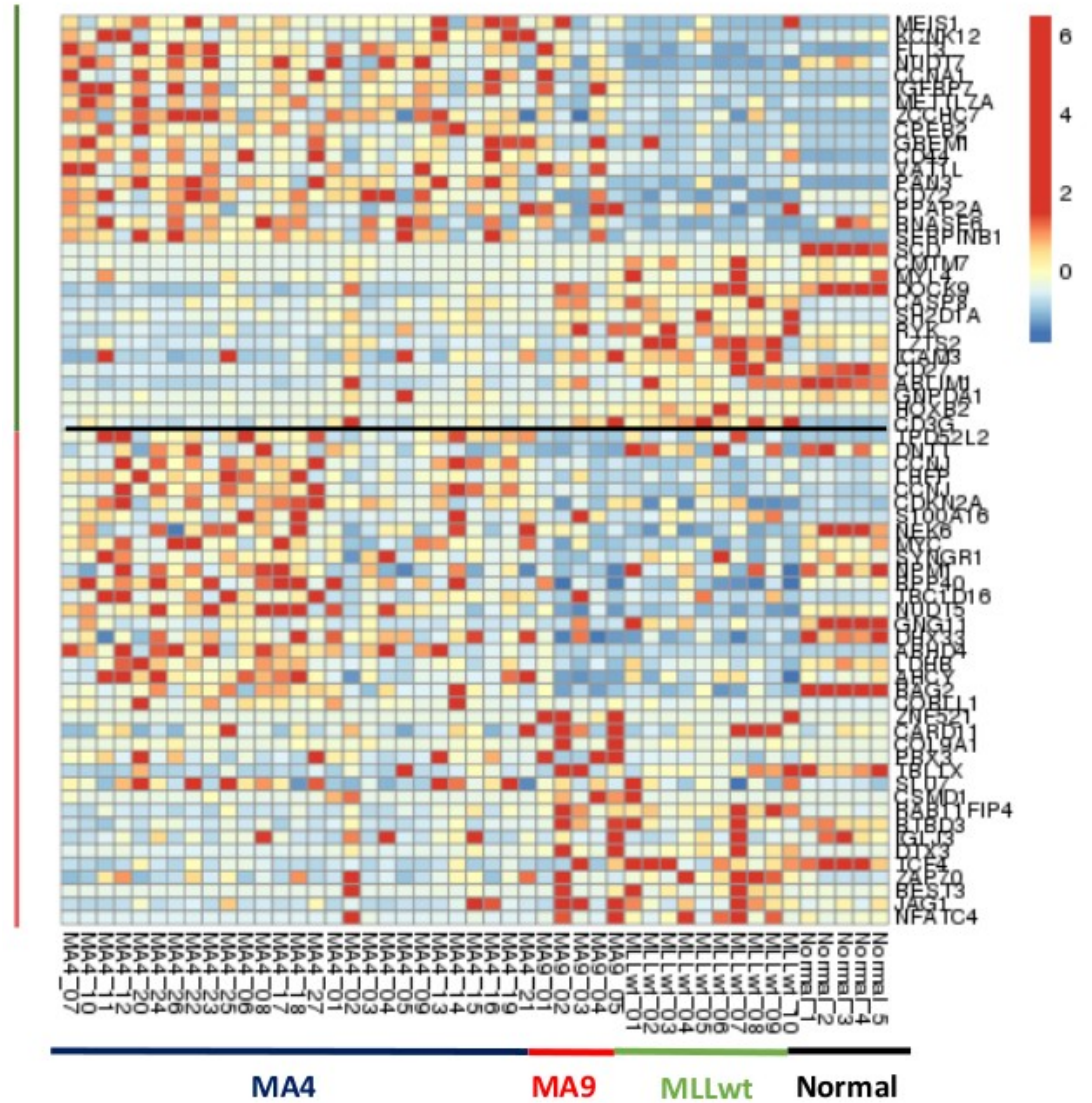

**Suppl. Figure 8. Venn Diagram of global transcriptional activation nature of MLL fusions.**

Number of upregulated (A) and downregulated (B) genes in each group studied by RNAseq.

**A**

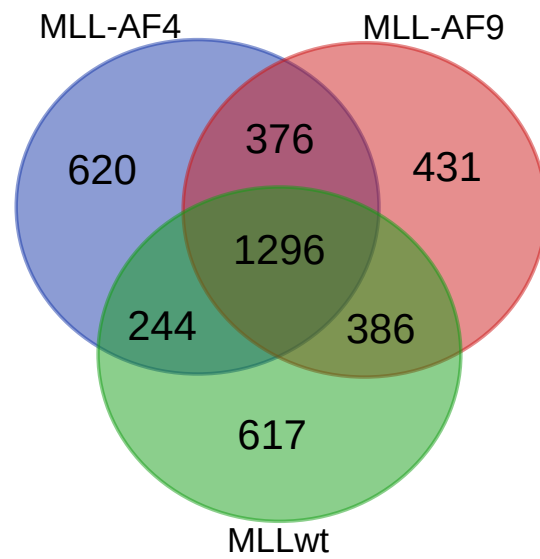

**B**

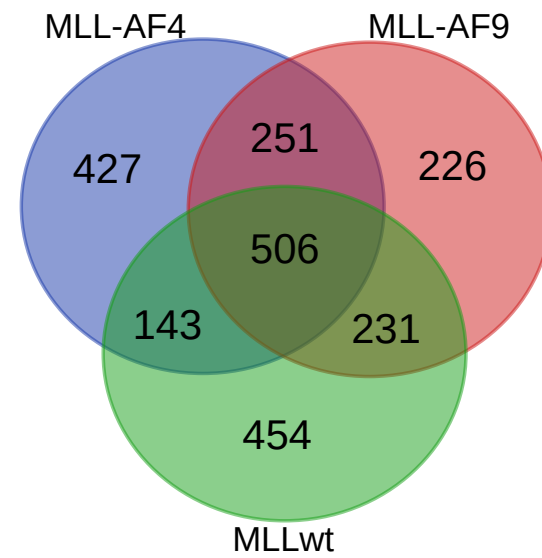

**Suppl. Figure 9. Heatmap representation of the most significant deregulated pathways identified by GSEA in the three infant iBCP-ALL subgroups as compared to normal FL-derived B-cell progenitors.**

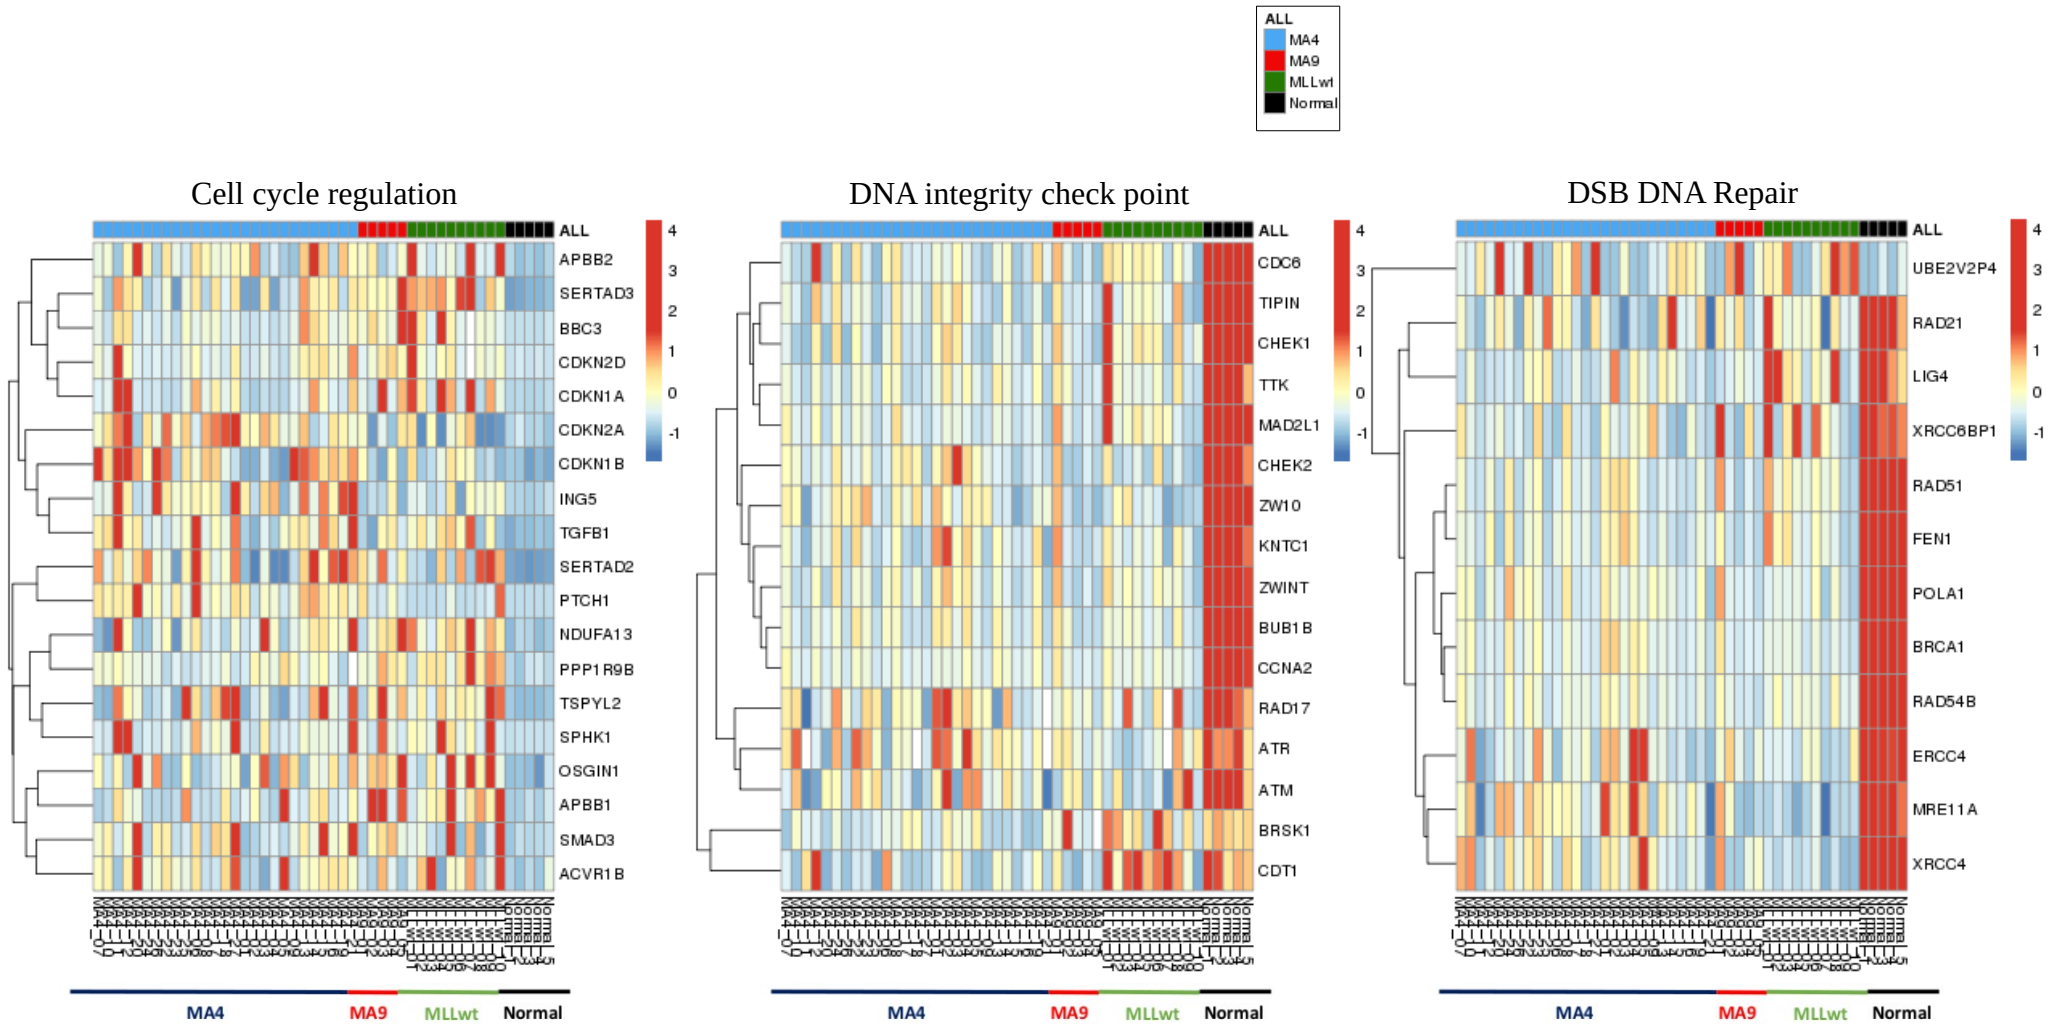

**Suppl. Figure 10. qRT-PCR validation of the indicated genes observed in our RNA-Seq.**

Bars represent average of relative fold-change and standard deviation in three independent replicates.  
\*p<0,05, \*\* p<0.01 y \*\*\*\* p<0.001

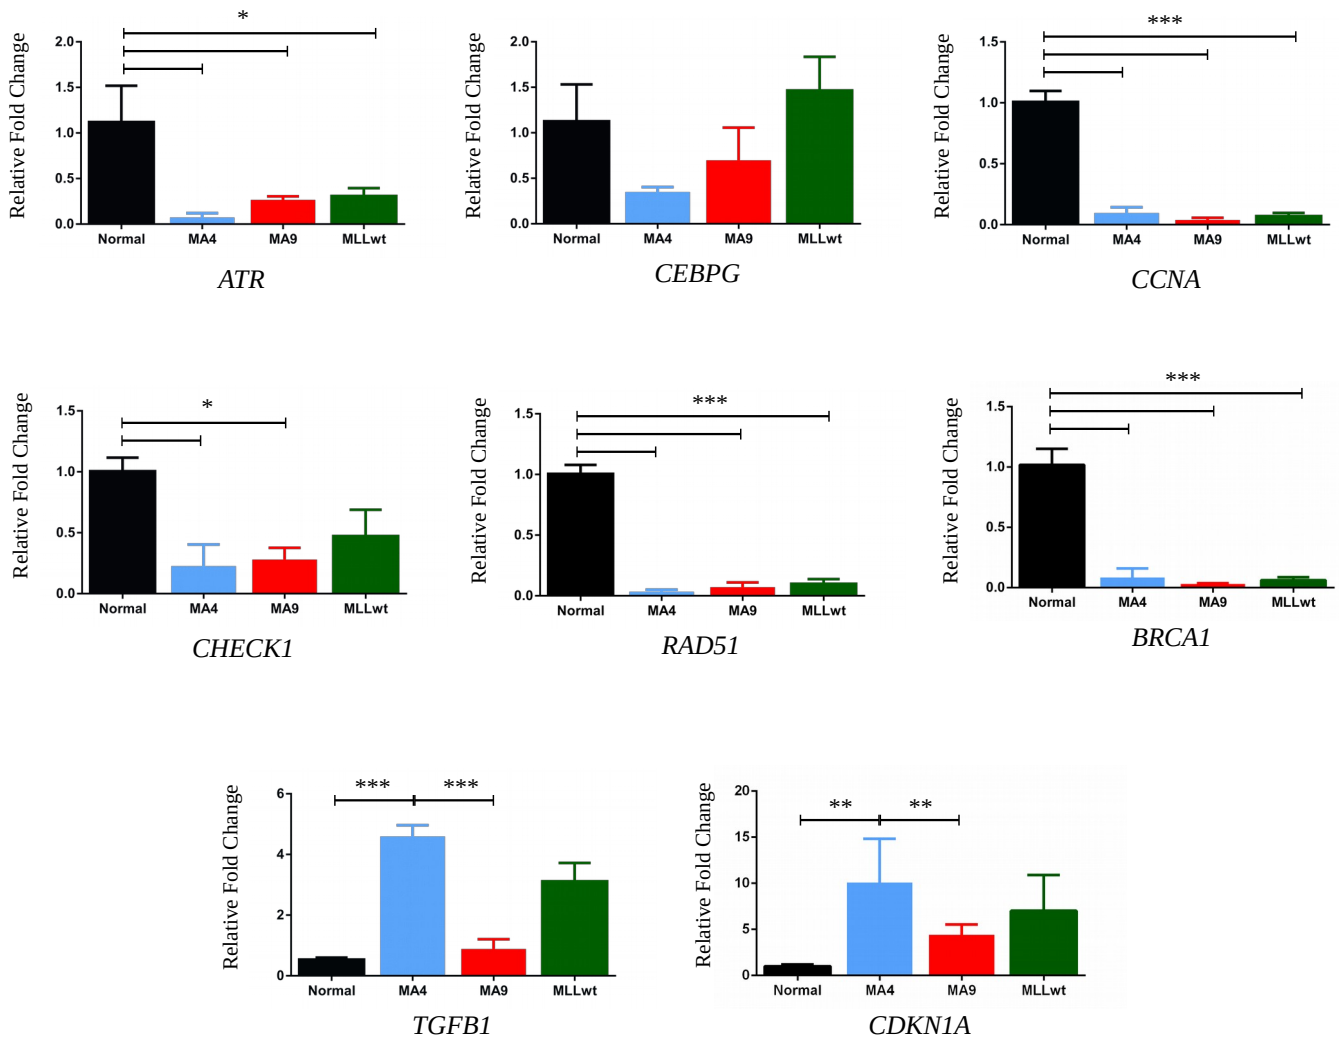

## Supplementary Tables

|                                                                                                               |   |
|---------------------------------------------------------------------------------------------------------------|---|
| <b>Suppl. Table 1.</b> Clinical and genetic characteristics of the 42 iBCP-ALL used in the discovery cohort.. | 2 |
| <b>Suppl. Table 2.</b> Primers used for analysis of BCR repertoires. ....                                     | 3 |
| <b>Suppl. Table 4.</b> MLL translocation breakpoints.....                                                     | 4 |
| <b>Suppl. Table 5.</b> Read counts per sample used for analysis of BCR repertoires.....                       | 5 |
| <b>Suppl. Table 6.</b> Top 100 genes determining PC1 and PC2 separation in Figure 6C. ....                    | 6 |

**Suppl. Table 1. Clinical and genetic characteristics of the 42 iBCP-ALL used in the discovery cohort.** \* months #PB: Peripheral blood, BM: Bone marrow.

| Cases ID | Hospital | Age*   | Gender | MLLr    | Specimen# | % Blast | Relapse |
|----------|----------|--------|--------|---------|-----------|---------|---------|
| MA4_01   | Paris    | 6 m    | M      | MLL-AF4 | PB        | 90      | NO      |
| MA4_02   | Paris    | 12 m   | M      | MLL-AF4 | BM        | 92      | NO      |
| MA4_03   | Paris    | 5 m    | M      | MLL-AF4 | PB        | 96      | NO      |
| MA4_04   | Paris    | 7 m    | M      | MLL-AF4 | PB        | 99      | NO      |
| MA4_05   | Paris    | 4.5 m  | F      | MLL-AF4 | PB        | 93      | NO      |
| MA4_06   | Erasmus  | 6.4 m  | F      | MLL-AF4 | BM        | 90      | NO      |
| MA4_07   | Erasmus  | 3.1 m  | F      | MLL-AF4 | PB        | 92      | NO      |
| MA4_08   | Erasmus  | 2.5 m  | M      | MLL-AF4 | BM        | 97      | NO      |
| MA4_09   | Erasmus  | 8.7 m  | F      | MLL-AF4 | PB        | 90      | NO      |
| MA4_10   | Erasmus  | 10.3 m | F      | MLL-AF4 | PB        | 94      | NO      |
| MA4_11   | Erasmus  | 10.1 m | F      | MLL-AF4 | BM        | 98      | NO      |
| MA4_12   | Erasmus  | 8.8 m  | M      | MLL-AF4 | BM        | 94      | NO      |
| MA4_13   | Erasmus  | 3.6 m  | M      | MLL-AF4 | PB        | 97      | NO      |
| MA4_14   | Erasmus  | 0.1 m  | F      | MLL-AF4 | BM        | 96      | YES     |
| MA4_15   | Erasmus  | 4.2 m  | F      | MLL-AF4 | PB        | 92      | NO      |
| MA4_16   | Erasmus  | 6.5 m  | F      | MLL-AF4 | BM        | 92      | NO      |
| MA4_17   | Erasmus  | 5.6 m  | M      | MLL-AF4 | PB        | 94      | YES     |
| MA4_18   | Monza    | 6.3 m  | F      | MLL-AF4 | BM        | 99      | YES     |
| MA4_19   | Monza    | 2.5 m  | M      | MLL-AF4 | BM        | 88      | NO      |
| MA4_20   | Monza    | 4.2 m  | M      | MLL-AF4 | BM        | 100     | YES     |
| MA4_21   | Monza    | 6 m    | F      | MLL-AF4 | BM        | 98      | YES     |
| MA4_22   | Monza    | 8 m    | M      | MLL-AF4 | BM        | 98      | YES     |
| MA4_23   | Monza    | 7.5 m  | M      | MLL-AF4 | BM        | 87      | YES     |
| MA4_24   | Monza    | 0.8 m  | M      | MLL-AF4 | BM        | Unknown | YES     |
| MA4_25   | Monza    | 3.1 m  | M      | MLL-AF4 | BM        | 100     | NO      |
| MA4_26   | Erasmus  | 7.2 m  | M      | MLL-AF4 | PB        | 96      | NO      |
| MA4_27   | Erasmus  | 6.4 m  | M      | MLL-AF4 | BM        | 92      | YES     |
| MA9_01   | Erasmus  | 3 m    | F      | MLL-AF9 | PB        | 93      | NO      |
| MA9_02   | Erasmus  | 2.6 m  | F      | MLL-AF9 | PB        | 98      | NO      |
| MA9_03   | Erasmus  | 11.2 m | F      | MLL-AF9 | PB        | 90      | NO      |
| MA9_04   | Erasmus  | 11.4 m | F      | MLL-AF9 | BM        | 90      | NO      |
| MA9_05   | Erasmus  | 0.4 m  | F      | MLL-AF9 | PB        | 90      | NO      |
| MLLwt_01 | Erasmus  | 11.3 m | F      | MLLwt   | BM        | 93      | NO      |
| MLLwt_02 | Erasmus  | 11.3 m | M      | MLLwt   | BM        | 90      | NO      |
| MLLwt_03 | Erasmus  | 0.4 m  | F      | MLLwt   | PB        | 98      | NO      |
| MLLwt_04 | Erasmus  | 11.7 m | M      | MLLwt   | PB        | 93      | NO      |
| MLLwt_05 | Erasmus  | 3.3 m  | M      | MLLwt   | BM        | 98      | NO      |
| MLLwt_06 | Erasmus  | 9 m    | F      | MLLwt   | BM        | 97      | NO      |
| MLLwt_07 | Erasmus  | 7.4 m  | F      | MLLwt   | PB        | 99      | NO      |
| MLLwt_08 | Erasmus  | 8.5 m  | M      | MLLwt   | PB        | 94      | NO      |
| MLLwt_09 | Erasmus  | 11.7 m | M      | MLLwt   | BM        | 98      | NO      |
| MLLwt_10 | Erasmus  | 4.2 m  | M      | MLLwt   | PB        | 95      | NO      |



**Suppl. Table 2. Primers used for analysis of BCR repertoires.**

| Oligo Name           | Sequence 5' to 3'                                        |
|----------------------|----------------------------------------------------------|
| VH1-FR1-HUMAN_BIOMED | GGCCTCAGTGAAGGTCTCCTGCAAG                                |
| VH2-FR1_HUMAN_BIOMED | GTCTGGTCCTACGCTGGTGAAACCC                                |
| VH3-FR1_HUMAN_BIOMED | CTGGGGGGTCCCTGAGACTCTCCTG                                |
| VH4-FR1_HUMAN_BIOMED | CTTCGGAGACCCTGTCCCTCACCTG                                |
| VH5-FR1_HUMAN_BIOMED | CGGGGAGTCTCTGAAGATCTCCTGT                                |
| VH6-FR1_HUMAN_BIOMED | TCGCAGACCCTCTCACTCACCTGTG                                |
| BC_IgHJ_HUMAN_BIOMED | TGTCCAGCACGCTTCAGGCTNNNNTNNNNTNNNNCTTACCTGAGGAGACGGTGACC |
| CNU_S                | TGTCCAGCACGCTTCAGGCT                                     |

**Suppl. Table 4. MLL translocation breakpoints.**

Genomic breakpoints determined by WGS at the base pair level in the MLL-AF4 and MLL-AF9 translocations

| Cases ID | MLL exon/intron    | AF4 exon/intron         | Breakpoint                                                       |
|----------|--------------------|-------------------------|------------------------------------------------------------------|
| MA4_01   | Exon 10            | Intron 3                | *Chr4:88004655-Chr11:118355607                                   |
| MA4_03   | Intron 10          | Intron 3                | Chr11:118359080-Chr4:87975057<br>*Chr4:87975036-Chr11:118358981  |
| MA4_04   | Intron 10          | Intron 3                | Chr11:118358194-Chr4:87992124<br>*Chr4:87989772-Chr11:118358572  |
| MA4_08   | Intron 10          | Intron 3                | Chr11:118359048-Chr4: 87977078                                   |
| MA4_09   | Exon 8             | Intron 3                | Chr11:118353327-Chr4:87975144                                    |
| MA4_10   | Intron 8           | Intron 3                | Chr11:118355109-Chr4:87976002                                    |
| MA4_13   | Exon 9             | Before exon 1 (reverse) | *Chr4:87854734-Chr11:118354941                                   |
| MA4_15   | Intron 9           | Intron 3                | *Chr4:87995770-Chr11:118355672                                   |
| MA4_16   | Intron 8 (reverse) | Intron 3 (reverse)      | *Chr4:87974323-Chr11:118354668                                   |
| MA4_19   | Intron 10          | Intron 3                | Chr11:118358319-Chr4:87988309<br>*Chr4:87988383-Chr11:118358153  |
| MA4_21   | Intron 10          | Intron 3                | Chr11:118357172-Chr4:87997625                                    |
| MA4_22   | Exon 11            | Intron 4 (reverse)      | *Chr4:88010955-Chr11:118359356                                   |
| MA4_23   | Intron 8           | Intron 3                | Chr11: 118353991-Chr4:87998295<br>*Chr4:87998749-Chr11:118353750 |
| MA4_26   | Intron 10          | Intron 3                | *Chr4:87998602-Chr11:118359398                                   |

| Cases ID | MLL exon/intron | MLLT3 exon/intron  | Breakpoint                      |
|----------|-----------------|--------------------|---------------------------------|
| MA9_02   | Intron 9        | Intron 4           | Chr11:118355190-Chr9:20441134   |
| MA9_04   | Intron 10       | Intron 5 (reverse) | *Chr9:20369705-Chr11: 118355611 |
| MA9_05   | Intron 10       | Intron 5           | Chr11:118358294-Chr9:20403549   |

\* reverse

Sheet1

| Sample | Chrom | Position  | Ref_base | Mut_base | Variant Allele Freq | Gene_ID       | Transcript_ID       | c.Annot         | p.Annot      | Consequence      |
|--------|-------|-----------|----------|----------|---------------------|---------------|---------------------|-----------------|--------------|------------------|
| MA4_01 | Chr17 | 15134242  | G        | A        | 0.188959285         | PMP22         | ENST00000395938_r73 | c.475 C>T       | p.R159C      | MISSENSE         |
| MA4_01 | Chr3  | 47144912  | A        | T        | 0.184537246         | SETD2         | ENST00000409792_r73 | c.4841 T>A      | p.I1614K     | MISSENSE         |
| MA4_02 | Chr1  | 29602226  | C        | T        | 0.118736142         | PTPRU         | ENST00000345512_r73 | c.1411 C>T      | p.R471C      | MISSENSE         |
| MA4_02 | Chr1  | 52442655  | G        | A        | 0.366571019         | RAB3B         | ENST00000371655_r73 | c.135 C>T       | p.D45D       | SILENT           |
| MA4_02 | Chr11 | 67265042  | G        | A        | 0.43257233          | PITPNM1       | ENST00000534749_r73 | c.1891 C>T      | p.R631C      | MISSENSE         |
| MA4_02 | Chr13 | 76415945  | C        | T        | 0.409429001         | LMO7          | ENST00000341547_r73 | c.3011 C>T      | p.P1004L     | MISSENSE         |
| MA4_02 | Chr8  | 144993489 | G        | A        | 0.552685248         | PLEC          | ENST00000345136_r73 | c.10500 C>T     | p.R3500R     | SILENT           |
| MA4_02 | ChrX  | 44942756  | -        | CAGG     | 0.127366057         | KDM6A         | ENST00000377967_r73 | c.3336 ->CAGG   | p.V1112fs*40 | FRAMESHIFT       |
| MA4_03 | ChrX  | 11196264  | C        | T        | 0.902975312         | ARHGAP6       | ENST00000380736_r73 | c.976 G>A       | p.V326M      | MISSENSE         |
| MA4_04 | Chr1  | 119466114 | G        | A        | 0.388781998         | TBX15         | ENST00000207157_r73 | c.488 C>T       | p.T163M      | MISSENSE         |
| MA4_04 | Chr10 | 124351862 | C        | T        | 0.334958854         | DMBT1         | ENST00000368909_r73 | c.2251 C>T      | p.R751*      | NONSENSE         |
| MA4_04 | Chr5  | 54529067  | T        | G        | 0.421348315         | CCNO          | ENST00000282572_r73 | c.285 A>C       | p.L95L       | SILENT           |
| MA4_04 | Chr5  | 76028542  | C        | T        | 0.06541033          | F2R           | ENST00000319211_r73 | c.492 C>T       | p.S164S      | SILENT           |
| MA4_05 | Chr4  | 170028169 | T        | C        | 0.155313712         | SH3RF1        | ENST00000284637_r73 | c.2327 A>G      | p.D776G      | MISSENSE         |
| MA4_06 | Chr10 | 22826203  | G        | A        | 0.057377049         | PIP4K2A       | ENST00000376573_r73 | c.1148 C>T      | p.A383V      | MISSENSE         |
| MA4_06 | Chr16 | 943056    | C        | T        | 0.455605039         | LMF1          | ENST00000262301_r73 | c.680 G>A       | p.R227Q      | MISSENSE         |
| MA4_06 | Chr17 | 26910871  | G        | A        | 0.273290703         | RP11-192H23.4 | ENST00000531839_r73 | c.761 C>T       | p.T254M      | MISSENSE         |
| MA4_06 | Chr17 | 66878843  | C        | T        | 0.064910079         | ABCA8         | ENST00000269080_r73 | c.3605 G>A      | p.S1202N     | MISSENSE         |
| MA4_06 | Chr12 | 25398284  | C        | A        | 0.097262667         | KRAS          | ENST00000311936_r73 | c.35 G>T        | p.G12V       | MISSENSE         |
| MA4_06 | Chr12 | 25398281  | C        | T        | 0.04127907          | KRAS          | ENST00000311936_r73 | c.38 G>A        | p.G13D       | MISSENSE         |
| MA4_07 | Chr14 | 38060843  | G        | A        | 0.044476206         | FOXA1         | ENST00000250448_r73 | c.1146 C>T      | p.H382H      | SILENT           |
| MA4_07 | Chr1  | 115258748 | C        | T        | 0.015116414         | NRAS          | ENST00000369535_r73 | c.34 G>A        | p.G12S       | MISSENSE         |
| MA4_08 | Chr1  | 32157115  | T        | A        | 0.073264246         | COL16A1       | ENST00000373672_r73 | Exon 19 - 2 A>T | -            | ESSENTIAL_SPLICE |
| MA4_08 | Chr11 | 3723715   | G        | A        | 0.323017992         | NUP98         | ENST00000324932_r73 | c.3490 C>T      | p.P1164S     | MISSENSE         |
| MA4_08 | Chr12 | 25378561  | G        | A        | 0.348619422         | KRAS          | ENST00000311936_r73 | c.437 C>T       | p.A146V      | MISSENSE         |
| MA4_08 | Chr2  | 99438545  | C        | T        | 0.402624515         | KIAA1211L     | ENST00000397899_r73 | c.2191 G>A      | p.G731R      | MISSENSE         |
| MA4_09 | Chr1  | 156640767 | C        | T        | 0.432276908         | NES           | ENST00000368223_r73 | c.3213 G>A      | p.V1071V     | SILENT           |
| MA4_09 | Chr10 | 134622358 | C        | T        | 0.24640952          | TTC40         | ENST00000368586_r73 | c.7715 G>A      | p.R2572Q     | MISSENSE         |
| MA4_09 | Chr16 | 85942669  | G        | C        | 0.042319508         | IRF8          | ENST00000268638_r73 | c.248 G>C       | p.R83P       | MISSENSE         |
| MA4_09 | Chr17 | 33875517  | C        | T        | 0.254864556         | SLFN14        | ENST00000415846_r73 | c.2480 G>A      | p.R827H      | MISSENSE         |
| MA4_09 | Chr17 | 29196542  | G        | A        | 0.258426966         | ATAD5         | ENST00000321990_r73 | c.3485 G>A      | p.R1162H     | MISSENSE         |
| MA4_10 | Chr11 | 113700009 | A        | T        | 0.25327096          | USP28         | ENST0000003302_r73  | c.969 T>A       | p.Y323*      | NONSENSE         |
| MA4_10 | Chr18 | 63527018  | G        | A        | 0.164255091         | CDH7          | ENST00000323011_r73 | c.1569 G>A      | p.T523T      | SILENT           |
| MA4_10 | Chr1  | 115258747 | C        | T        | 0.018408166         | NRAS          | ENST00000369535_r73 | c.35 G>A        | p.G12D       | MISSENSE         |
| MA4_10 | Chr1  | 115258744 | C        | T        | 0.027023838         | NRAS          | ENST00000369535_r73 | c.38 G>A        | p.G13D       | MISSENSE         |
| MA4_10 | Chr1  | 115258748 | C        | T        | 0.082718744         | NRAS          | ENST00000369535_r73 | c.34 G>A        | p.G12S       | MISSENSE         |

Sheet1

|         |       |           |   |   |             |            |                     |             |          |          |
|---------|-------|-----------|---|---|-------------|------------|---------------------|-------------|----------|----------|
| MA4_11  | Chr11 | 117329595 | G | A | 0.065889916 | DSCAML1    | ENST00000321322_r73 | c.3623 C>T  | p.T1208M | MISSENSE |
| MA4_11  | Chr4  | 30724484  | G | A | 0.114128216 | PCDH7      | ENST00000361762_r73 | c.1440 G>A  | p.Q480Q  | SILENT   |
| MA4_11  | ChrX  | 122800961 | G | A | 0.1242656   | THOC2      | ENST00000355725_r73 | c.1186 C>T  | p.R396*  | NONSENSE |
| MA4_11  | Chr1  | 115258747 | C | T | 0.130104615 | NRAS       | ENST00000369535_r73 | c.35 G>A    | p.G12D   | MISSENSE |
| MA4_12  | Chr1  | 115258747 | C | T | 0.03465982  | NRAS       | ENST00000369535_r73 | c.35 G>A    | p.G12D   | MISSENSE |
| MA4_12  | Chr1  | 115258744 | C | T | 0.037227214 | NRAS       | ENST00000369535_r73 | c.38 G>A    | p.G13D   | MISSENSE |
| MA4_13  | Chr1  | 77093213  | G | A | 0.431059092 | ST6GALNAC3 | ENST00000328299_r73 | c.700 G>A   | p.V234I  | MISSENSE |
| MA4_14  | Chr1  | 12183370  | G | A | 0.378454145 | TNFRSF8    | ENST00000263932_r73 | c.976 G>A   | p.A326T  | MISSENSE |
| MA4_14  | ChrX  | 153582588 | C | T | 0.467612001 | FLNA       | ENST00000360319_r73 | c.5464 G>A  | p.V1822M | MISSENSE |
| MA4_14R | Chr1  | 115258748 | C | T | 0.443557526 | NRAS       | ENST00000369535_r73 | c.34 G>A    | p.G12S   | MISSENSE |
| MA4_15  | ChrX  | 32503115  | A | G | 0.41562785  | DMD        | ENST00000378677_r73 | c.2712 T>C  | p.D904D  | SILENT   |
| MA4_15  | Chr13 | 28602340  | G | T | 0.441176471 | FLT3       | ENST00000241453_r73 | c.2028 C>A  | p.N676K  | MISSENSE |
| MA4_16  | Chr20 | 62493709  | C | T | 0.348211355 | ABHD16B    | ENST00000369916_r73 | c.816 C>T   | p.F272F  | SILENT   |
| MA4_17  | Chr12 | 25398284  | C | A | 0.41875     | KRAS       | ENST00000311936_r73 | c.35 G>T    | p.G12V   | MISSENSE |
| MA4_17R | Chr1  | 26670871  | G | T | 0.153743711 | AIM1L      | ENST00000374207_r73 | c.313 C>A   | p.L105M  | MISSENSE |
| MA4_17R | Chr12 | 70965002  | T | A | 0.139347021 | PTPRB      | ENST00000334414_r73 | c.3174 A>T  | p.S1058S | SILENT   |
| MA4_17R | Chr15 | 60747314  | G | C | 0.124878397 | NARG2      | ENST00000261520_r73 | c.831 C>G   | p.H277Q  | MISSENSE |
| MA4_17R | Chr16 | 67228769  | G | A | 0.159920574 | E2F4       | ENST00000379378_r73 | c.694 G>A   | p.A232T  | MISSENSE |
| MA4_17R | Chr19 | 1987165   | C | T | 0.171126761 | BTBD2      | ENST00000255608_r73 | c.1269 G>A  | p.Q423Q  | SILENT   |
| MA4_17R | Chr4  | 48490578  | C | T | 0.179612163 | SLC10A4    | ENST00000273861_r73 | c.936 C>T   | p.Y312Y  | SILENT   |
| MA4_17R | Chr5  | 90144542  | G | A | 0.167889439 | GPR98      | ENST00000405460_r73 | c.17108 G>A | p.R5703H | MISSENSE |
| MA4_17R | ChrX  | 37979633  | G | C | 0.257247584 | SYTL5      | ENST00000297875_r73 | c.1619 G>C  | p.G540A  | MISSENSE |
| MA4_17R | Chr9  | 732503    | G | A | 0.045454546 | KANK1      | ENST00000382303_r73 | c.3131 G>A  | p.R1044Q | MISSENSE |
| MA4_18  | Chr12 | 25398281  | C | T | 0.212984055 | KRAS       | ENST00000311936_r73 | c.38 G>A    | p.G13D   | MISSENSE |
| MA4_18R | Chr10 | 50315892  | G | A | 0.137142857 | VSTM4      | ENST00000332853_r73 | c.204 C>T   | p.F68F   | SILENT   |
| MA4_18R | Chr10 | 61898828  | C | T | 0.084442696 | ANK3       | ENST00000280772_r73 | c.2632 G>A  | p.G878R  | MISSENSE |
| MA4_18R | Chr11 | 65628573  | G | A | 0.166583665 | MUS81      | ENST00000308110_r73 | c.265 G>A   | p.G89S   | MISSENSE |
| MA4_18R | Chr11 | 73074260  | C | G | 0.183411215 | ARHGEF17   | ENST00000263674_r73 | c.5006 C>G  | p.T1669S | MISSENSE |
| MA4_18R | Chr11 | 108593986 | G | A | 0.146759388 | DDX10      | ENST00000322536_r73 | c.1762 G>A  | p.D588N  | MISSENSE |
| MA4_18R | Chr14 | 75375610  | C | G | 0.068568233 | RPS6KL1    | ENST00000555647_r73 | c.1386 G>C  | p.T462T  | SILENT   |
| MA4_18R | Chr15 | 79296469  | G | A | 0.151010002 | RASGRF1    | ENST00000558480_r73 | c.2124 C>T  | p.Y708Y  | SILENT   |
| MA4_18R | Chr16 | 71065790  | G | C | 0.086487782 | HYDIN      | ENST00000393567_r73 | c.2560 C>G  | p.P854A  | MISSENSE |
| MA4_18R | Chr17 | 10541516  | G | C | 0.13260947  | MYH3       | ENST00000583535_r73 | c.3573 C>G  | p.A1191A | SILENT   |
| MA4_18R | Chr18 | 74587457  | C | G | 0.181245626 | ZNF236     | ENST00000253159_r73 | c.671 C>G   | p.P224R  | MISSENSE |
| MA4_18R | Chr19 | 9070839   | C | T | 0.172091641 | MUC16      | ENST00000397910_r73 | c.16607 G>A | p.R5536Q | MISSENSE |
| MA4_18R | Chr19 | 13409769  | C | T | 0.001333088 | CACNA1A    | ENST00000360228_r73 | c.2678 G>A  | p.R893Q  | MISSENSE |
| MA4_18R | Chr2  | 69556824  | C | G | 0.131769029 | GFPT1      | ENST00000361060_r73 | c.1535 G>C  | p.R512P  | MISSENSE |

Sheet1

|         |       |           |        |   |             |          |                     |                 |               |            |
|---------|-------|-----------|--------|---|-------------|----------|---------------------|-----------------|---------------|------------|
| MA4_18R | Chr2  | 219893011 | G      | A | 0.002873563 | CCDC108  | ENST00000341552_r73 | c.1763 C>T      | p.T588M       | MISSENSE   |
| MA4_18R | Chr20 | 36374918  | C      | T | 0.174187651 | CTNBL1   | ENST00000361383_r73 | c.375 C>T       | p.H125H       | SILENT     |
| MA4_18R | Chr22 | 43901486  | G      | A | 0.181884817 | MPPED1   | ENST00000417669_r73 | c.971 G>A       | p.R324Q       | MISSENSE   |
| MA4_18R | Chr3  | 48681041  | G      | C | 0.207036615 | CELSR3   | ENST00000164024_r73 | c.8235 C>G      | p.V2745V      | SILENT     |
| MA4_18R | Chr3  | 62502298  | C      | T | 0.139903995 | CADPS    | ENST00000383710_r73 | c.2414 G>A      | p.R805Q       | MISSENSE   |
| MA4_18R | Chr9  | 139404399 | C      | T | 0.24613351  | NOTCH1   | ENST00000277541_r73 | c.2755 G>A      | p.G919R       | MISSENSE   |
| MA4_18R | Chr3  | 138187036 | G      | C | 0.160185368 | ESYT3    | ENST00000389567_r73 | c.1308 G>C      | p.E436D       | MISSENSE   |
| MA4_18R | Chr10 | 95069922  | C      | T | 0.159251197 | MYOF     | ENST00000358334_r73 | c.5963 G>A      | p.R1988Q      | MISSENSE   |
| MA4_18R | Chr6  | 143093951 | C      | T | 0.178131544 | HIVEP2   | ENST00000367604_r73 | c.1925 G>A      | p.R642Q       | MISSENSE   |
| MA4_18R | Chr16 | 30410163  | G      | A | 0.162408063 | ZNF48    | ENST00000320159_r73 | c.1592 G>A      | p.R531Q       | MISSENSE   |
| MA4_18R | Chr11 | 17742858  | G      | A | 0.065334358 | MYOD1    | ENST00000250003_r73 | c.766 G>A       | p.V256M       | MISSENSE   |
| MA4_18R | Chr13 | 80055428  | C      | T | 0.097651422 | NDFIP2   | ENST00000218652_r73 | c.90 C>T        | p.T30T        | SILENT     |
| MA4_18R | Chr19 | 17439019  | C      | T | 0.148471616 | ANO8     | ENST00000159087_r73 | c.2178 G>A      | p.S726S       | SILENT     |
| MA4_18R | Chr4  | 110448484 | G      | A | 0.131083481 | SEC24B   | ENST00000399100_r73 | c.2867 G>A      | p.R956Q       | MISSENSE   |
| MA4_18R | Chr6  | 96034806  | G      | A | 0.097014925 | MANEA    | ENST00000358812_r73 | c.491 G>A       | p.R164Q       | MISSENSE   |
| MA4_18R | Chr6  | 154414520 | C      | T | 0.117647059 | OPRM1    | ENST00000229768_r73 | c.1280 C>T      | p.S427L       | MISSENSE   |
| MA4_18R | Chr7  | 97937061  | G      | A | 0.14        | BAIAP2L1 | ENST00000005260_r73 | c.1103 C>T      | p.T368M       | MISSENSE   |
| MA4_18R | Chr7  | 100634393 | T      | G | 0.24        | MUC12    | ENST00000536621_r73 | c.549 T>G       | p.S183R       | MISSENSE   |
| MA4_18R | Chr7  | 103216088 | C      | G | 0.215384615 | RELN     | ENST00000428762_r73 | c.4210 G>C      | p.D1404H      | MISSENSE   |
| MA4_18R | Chr8  | 110587801 | G      | A | 0.116129032 | SYBU     | ENST00000533895_r73 | c.1323 C>T      | p.F441F       | SILENT     |
| MA4_18R | Chr8  | 121209184 | T      | A | 0.205714286 | COL14A1  | ENST00000297848_r73 | c.591 T>A       | p.I197I       | SILENT     |
| MA4_18R | Chr9  | 15657131  | A      | G | 0.470588235 | CCDC171  | ENST00000380701_r73 | c.829 A>G       | p.T277A       | MISSENSE   |
| MA4_18R | Chr9  | 117846595 | G      | C | 0.110294118 | TNC      | ENST00000350763_r73 | c.2024 C>G      | p.T675R       | MISSENSE   |
| MA4_18R | Chr9  | 122011276 | T      | A | 0.163043478 | DBC1     | ENST00000265922_r73 | c.371 A>T       | p.K124M       | MISSENSE   |
| MA4_18R | ChrX  | 54117762  | G      | A | 0.104477612 | FAM120C  | ENST00000375180_r73 | c.2410 C>T      | p.R804*       | NONSENSE   |
| MA4_18R | ChrX  | 71876082  | C      | T | 0.221698113 | PHKA1    | ENST00000373542_r73 | c.929 G>A       | p.R310H       | MISSENSE   |
| MA4_18R | ChrX  | 152827614 | G      | A | 0.105263158 | ATP2B3   | ENST00000349466_r73 | c.3073 G>A      | p.G1025R      | MISSENSE   |
| MA4_18R | Chr3  | 32571050  | T      | - | 0.135135135 | DYNC1LI1 | ENST00000273130_r73 | c.1288 A>-      | p.I430fs*5    | FRAMESHIFT |
| MA4_19  | Chr22 | 22712553  | G      | A | 0.039168111 | IGLV1-47 | ENST00000390294_r73 | c.296 G>A       | p.R99Q        | MISSENSE   |
| MA4_20  | Chr1  | 115256529 | T      | A | 0.264634839 | NRAS     | ENST00000369535_r73 | c.182 A>T       | p.Q61L        | MISSENSE   |
| MA4_20  | Chr16 | 2283522   | C      | T | 0.452965621 | E4F1     | ENST00000301727_r73 | c.1140 C>T      | p.I380I       | SILENT     |
| MA4_20  | Chr22 | 40807815  | G      | A | 0.241766284 | MKL1     | ENST00000355630_r73 | c.2375 C>T      | p.S792L       | MISSENSE   |
| MA4_20  | Chr12 | 53682409  | GCCCAT | - | 0.453414352 | ESPL1    | ENST00000552462_r73 | c.4634 GCCCAT>- | p.S1545 SPC>S | MISSENSE   |
| MA4_20R | Chr1  | 115256529 | T      | A | 0.201530891 | NRAS     | ENST00000369535_r73 | c.182 A>T       | p.Q61L        | MISSENSE   |
| MA4_20R | Chr10 | 24889767  | C      | T | 0.069881598 | ARHGAP21 | ENST00000396432_r73 | c.2940 G>A      | p.T980T       | SILENT     |
| MA4_20R | Chr11 | 108380476 | C      | G | 0.09033675  | EXPH5    | ENST00000265843_r73 | c.5758 G>C      | p.G1920R      | MISSENSE   |
| MA4_20R | Chr16 | 2283522   | C      | T | 0.229450857 | E4F1     | ENST00000301727_r73 | c.1140 C>T      | p.I380I       | SILENT     |

Sheet1

|         |       |           |        |           |             |         |                     |                   |               |          |
|---------|-------|-----------|--------|-----------|-------------|---------|---------------------|-------------------|---------------|----------|
| MA4_20R | Chr17 | 7577121   | G      | A         | 0.211493113 | TP53    | ENST00000269305_r73 | c.817 C>T         | p.R273C       | MISSENSE |
| MA4_20R | Chr22 | 40807815  | G      | A         | 0.237129485 | MKL1    | ENST00000355630_r73 | c.2375 C>T        | p.S792L       | MISSENSE |
| MA4_20R | Chr12 | 53682409  | GCCCAT | -         | 0.220722509 | ESPL1   | ENST00000552462_r73 | c.4634 GCCCAT>-   | p.S1545 SPC>S | MISSENSE |
| MA4_21  | Chr11 | 70332174  | T      | G         | 0.186440678 | SHANK2  | ENST00000409161_r73 | c.2436 A>C        | p.T812T       | SILENT   |
| MA4_21  | Chr5  | 139422532 | -      | GCTGCTGCT | 0.391304348 | NRG2    | ENST00000361474_r73 | c.123 ->AGCAGCAGC | p.S41 S>RAAA  | MISSENSE |
| MA4_22  | Chr9  | 127216294 | C      | A         | 0.475362319 | GPR144  | ENST00000334810_r73 | c.996 C>A         | p.C332*       | NONSENSE |
| MA4_22  | Chr12 | 23818481  | C      | T         | 0.178747941 | SOX5    | ENST00000546136_r73 | c.789 G>A         | p.P263P       | SILENT   |
| MA4_22  | Chr15 | 75114997  | C      | T         | 0.116832958 | LMAN1L  | ENST00000309664_r73 | c.1146 C>T        | p.V382V       | SILENT   |
| MA4_22  | Chr10 | 48428949  | C      | T         | 0.391472285 | GDF10   | ENST00000224605_r73 | c.937 G>A         | p.A313T       | MISSENSE |
| MA4_22  | Chr1  | 31836903  | G      | T         | 0.078651685 | ZCCHC17 | ENST00000344147_r73 | c.589 G>T         | p.D197Y       | MISSENSE |
| MA4_22  | Chr16 | 46993000  | C      | T         | 0.115942029 | DNAJA2  | ENST00000317089_r73 | c.962 G>A         | p.R321H       | MISSENSE |
| MA4_22  | Chr1  | 115258747 | C      | T         | 0.109902848 | NRAS    | ENST00000369535_r73 | c.35 G>A          | p.G12D        | MISSENSE |
| MA4_22  | Chr1  | 115258744 | C      | T         | 0.013689556 | NRAS    | ENST00000369535_r73 | c.38 G>A          | p.G13D        | MISSENSE |
| MA4_22  | Chr12 | 25398284  | C      | A         | 0.199459703 | KRAS    | ENST00000311936_r73 | c.35 G>A          | p.G12D        | MISSENSE |
| MA4_22  | Chr4  | 26422290  | C      | T         | 0.228111724 | RBPJ    | ENST00000345843_r73 | c.433 C>T         | p.R145W       | MISSENSE |
| MA4_22  | Chr11 | 95825853  | G      | A         | 0.091054045 | MAML2   | ENST00000524717_r73 | c.1342 C>T        | p.R448W       | MISSENSE |
| MA4_22R | Chr13 | 52549042  | G      | A         | 0.34623323  | ATP7B   | ENST00000242839_r73 | c.314 C>T         | p.S105L       | MISSENSE |
| MA4_22R | Chr18 | 42531586  | G      | A         | 0.377956481 | SETBP1  | ENST00000282030_r73 | c.2281 G>A        | p.V761M       | MISSENSE |
| MA4_22R | Chr16 | 16173246  | G      | A         | 0.763759526 | ABCC1   | ENST00000399410_r73 | c.2026 G>A        | p.V676M       | MISSENSE |
| MA4_22R | Chr16 | 76555115  | C      | T         | 0.138461539 | CNTNAP4 | ENST00000478060_r73 | c.2225 C>T        | p.A742V       | MISSENSE |
| MA4_22R | Chr16 | 81078294  | G      | A         | 0.376859504 | ATMIN   | ENST00000299575_r73 | c.2191 G>A        | p.V731M       | MISSENSE |
| MA4_22R | Chr6  | 96997360  | G      | A         | 0.402628435 | UFL1    | ENST00000369278_r73 | c.1593 G>A        | p.T531T       | SILENT   |
| MA4_22R | Chr3  | 137988903 | G      | A         | 0.271493213 | ARMC8   | ENST00000481646_r73 | c.1366 G>A        | p.V456I       | MISSENSE |
| MA4_22R | Chr3  | 142277509 | G      | C         | 0.068720379 | ATR     | ENST00000350721_r73 | c.1842 C>G        | p.A614A       | SILENT   |
| MA4_22R | Chr9  | 124632975 | C      | T         | 0.417341041 | TLL11   | ENST00000321582_r73 | c.1804 G>A        | p.E602K       | MISSENSE |
| MA4_22R | Chr12 | 20801787  | A      | C         | 0.076212471 | PDE3A   | ENST00000359062_r73 | c.2731 A>C        | p.K911Q       | MISSENSE |
| MA4_22R | Chr12 | 21795009  | G      | C         | 0.300685136 | LDHB    | ENST00000396076_r73 | c.472 C>G         | p.R158G       | MISSENSE |
| MA4_22R | Chr12 | 76740737  | C      | T         | 0.246085011 | BBS10   | ENST00000393262_r73 | c.1028 G>A        | p.R343Q       | MISSENSE |
| MA4_22R | Chr11 | 95825853  | G      | A         | 0.131651985 | MAML2   | ENST00000524717_r73 | c.1342 C>T        | p.R448W       | MISSENSE |
| MA4_22R | Chr15 | 68695329  | C      | T         | 0.400844406 | ITGA11  | ENST00000315757_r73 | c.92 G>A          | p.R31Q        | MISSENSE |
| MA4_22R | Chr15 | 98513945  | G      | A         | 0.296703297 | ARRDC4  | ENST00000268042_r73 | c.1172 G>A        | p.R391Q       | MISSENSE |
| MA4_22R | Chr8  | 144994538 | G      | A         | 0.094175286 | PLEC    | ENST00000345136_r73 | c.9451 C>T        | p.R3151C      | MISSENSE |
| MA4_22R | Chr4  | 26422290  | C      | T         | 0.229225636 | RBPJ    | ENST00000345843_r73 | c.433 C>T         | p.R145W       | MISSENSE |
| MA4_22R | Chr4  | 77036593  | C      | T         | 0.685747664 | NUP54   | ENST00000264883_r73 | c.1450 G>A        | p.D484N       | MISSENSE |
| MA4_22R | Chr4  | 88986625  | G      | A         | 0.366681825 | PKD2    | ENST00000237596_r73 | c.2218 G>A        | p.E740K       | MISSENSE |
| MA4_22R | Chr10 | 70105604  | G      | A         | 0.2566146   | RUFY2   | ENST00000388768_r73 | c.1847 C>T        | p.P616L       | MISSENSE |
| MA4_22R | Chr5  | 50091171  | G      | A         | 0.331018519 | PARP8   | ENST00000505697_r73 | c.1348 G>A        | p.A450T       | MISSENSE |

Sheet1

|         |       |           |   |   |             |         |                     |            |          |          |
|---------|-------|-----------|---|---|-------------|---------|---------------------|------------|----------|----------|
| MA4_22R | Chr7  | 131825491 | C | T | 0.248064138 | PLXNA4  | ENST00000359827_r73 | c.5305 G>A | p.A1769T | MISSENSE |
| MA4_22R | Chr7  | 150553626 | C | T | 0.278790389 | AOC1    | ENST00000493429_r73 | c.68 C>T   | p.P23L   | MISSENSE |
| MA4_22R | Chr17 | 7577539   | G | A | 0.788971717 | TP53    | ENST00000269305_r73 | c.742 C>T  | p.R248W  | MISSENSE |
| MA4_22R | Chr17 | 27185635  | G | A | 0.409534128 | ERAL1   | ENST00000254928_r73 | c.753 G>A  | p.T251T  | SILENT   |
| MA4_22R | Chr1  | 15987008  | G | A | 0.344632768 | RSC1A1  | ENST00000345034_r73 | c.645 G>A  | p.T215T  | SILENT   |
| MA4_22R | Chr1  | 223177194 | G | A | 0.365754813 | DISP1   | ENST00000284476_r73 | c.2455 G>A | p.A819T  | MISSENSE |
| MA4_22R | Chr1  | 15987008  | G | A | 0.344632768 | DDI2    | ENST00000480945_r73 | c.1923 G>A | -        | UTR      |
| MA4_22R | Chr7  | 131825491 | C | T | 0.248064138 | PLXNA4  | ENST00000359827_r73 | c.5546 C>T | p.A1849V | MISSENSE |
| MA4_22R | Chr12 | 25398284  | C | A | 0.538461538 | KRAS    | ENST00000311936_r73 | c.437 C>T  | p.A146V  | MISSENSE |
| MA4_22R | Chr9  | 127216294 | C | A | 0.472222222 | GPR144  | ENST00000334810_r73 | c.996 C>A  | p.C332*  | NONSENSE |
| MA4_22R | Chr11 | 899385    | C | T | 0.051546392 | CHID1   | ENST00000323578_r73 | c.563 G>A  | p.G188D  | MISSENSE |
| MA4_22R | Chr11 | 3727740   | G | C | 0.051724138 | NUP98   | ENST00000324932_r73 | c.2860 C>G | p.Q954E  | MISSENSE |
| MA4_22R | Chr11 | 3756473   | C | T | 0.076086957 | NUP98   | ENST00000324932_r73 | c.1490 G>A | p.G497E  | MISSENSE |
| MA4_22R | Chr11 | 5067819   | C | T | 0.070588235 | OR52J3  | ENST00000380370_r73 | c.64 C>T   | p.L22L   | SILENT   |
| MA4_22R | Chr11 | 5444297   | G | A | 0.06043956  | OR51Q1  | ENST00000300778_r73 | c.867 G>A  | p.M289I  | MISSENSE |
| MA4_22R | Chr11 | 5565853   | C | T | 0.303571429 | OR52H1  | ENST00000322653_r73 | c.901 G>A  | p.G301R  | MISSENSE |
| MA4_22R | Chr11 | 5809210   | C | T | 0.059701493 | OR52N1  | ENST00000317078_r73 | c.837 G>A  | p.M279I  | MISSENSE |
| MA4_22R | Chr11 | 8941004   | G | A | 0.291139241 | AKIP1   | ENST00000299576_r73 | c.529 G>A  | p.V177M  | MISSENSE |
| MA4_22R | Chr11 | 9735099   | C | G | 0.050420168 | SWAP70  | ENST00000318950_r73 | c.327 C>G  | p.L109L  | SILENT   |
| MA4_22R | Chr11 | 32975682  | G | A | 0.322033898 | QSER1   | ENST00000399302_r73 | c.4070 G>A | p.R1357H | MISSENSE |
| MA4_22R | Chr11 | 33090290  | G | A | 0.064516129 | TCP11L1 | ENST00000334274_r73 | c.1212 G>A | p.V404V  | SILENT   |
| MA4_22R | Chr11 | 36248802  | G | A | 0.238938053 | LDLRAD3 | ENST00000315571_r73 | c.622 G>A  | p.V208M  | MISSENSE |
| MA4_22R | Chr11 | 46388273  | C | T | 0.098765432 | DGKZ    | ENST00000454345_r73 | c.467 C>T  | p.P156L  | MISSENSE |
| MA4_22R | Chr11 | 46724646  | C | A | 0.136363636 | ZNF408  | ENST00000311764_r73 | c.505 C>A  | p.L169M  | MISSENSE |
| MA4_22R | Chr11 | 47446685  | G | C | 0.125       | PSMC3   | ENST00000298852_r73 | c.272 C>G  | p.S91C   | MISSENSE |
| MA4_22R | Chr11 | 56409825  | C | G | 0.051502146 | OR5AP2  | ENST00000302981_r73 | c.91 G>C   | p.G31R   | MISSENSE |
| MA4_22R | Chr11 | 57564307  | G | A | 0.066115703 | CTNND1  | ENST00000524630_r73 | c.799 G>A  | p.G267R  | MISSENSE |
| MA4_22R | Chr11 | 60506408  | G | A | 0.052631579 | MS4A18  | ENST00000529108_r73 | c.205 G>A  | p.A69T   | MISSENSE |
| MA4_22R | Chr11 | 62362542  | C | A | 0.114754098 | MTA2    | ENST00000278823_r73 | c.1484 G>T | p.C495F  | MISSENSE |
| MA4_22R | Chr11 | 64507168  | G | T | 0.105882353 | RASGRP2 | ENST00000394432_r73 | c.636 C>A  | p.L212L  | SILENT   |
| MA4_22R | Chr11 | 64697810  | G | A | 0.469387755 | PPP2R5B | ENST00000164133_r73 | c.739 G>A  | p.E247K  | MISSENSE |
| MA4_22R | Chr11 | 66190332  | C | T | 0.065789474 | NPAS4   | ENST00000311034_r73 | c.618 C>T  | p.G206G  | SILENT   |
| MA4_22R | Chr1  | 238045782 | C | T | 0.066115703 | ZP4     | ENST00000366570_r73 | c.1563 G>A | p.L521L  | SILENT   |
| MA4_22R | Chr1  | 241755414 | G | A | 0.087912088 | KMO     | ENST00000366559_r73 | c.1420 G>A | p.V474M  | MISSENSE |
| MA4_22R | Chr1  | 242030233 | G | C | 0.248554913 | EXO1    | ENST00000366548_r73 | c.1143 G>C | p.S381S  | SILENT   |
| MA4_22R | Chr13 | 25274920  | C | T | 0.051546392 | ATP12A  | ENST00000381946_r73 | c.1741 C>T | p.P581S  | MISSENSE |
| MA4_22R | Chr13 | 25363493  | G | C | 0.394736842 | RNF17   | ENST00000255324_r73 | c.791 G>C  | p.R264P  | MISSENSE |

Sheet1

|         |       |           |   |   |             |           |                     |                 |          |                  |
|---------|-------|-----------|---|---|-------------|-----------|---------------------|-----------------|----------|------------------|
| MA4_22R | Chr13 | 28498569  | C | T | 0.133333333 | PDX1      | ENST00000381033_r73 | c.583 C>T       | p.Q195*  | NONSENSE         |
| MA4_22R | Chr13 | 33016677  | C | T | 0.062893082 | N4BP2L2   | ENST00000399396_r73 | c.1997 G>A      | p.R666K  | MISSENSE         |
| MA4_22R | Chr13 | 39424199  | G | A | 0.180722892 | FREM2     | ENST00000280481_r73 | c.6404 G>A      | p.R2135Q | MISSENSE         |
| MA4_22R | Chr13 | 39597187  | A | T | 0.05106383  | PROSER1   | ENST00000352251_r73 | Exon 8 2 T>A    | -        | ESSENTIAL_SPLICE |
| MA4_22R | Chr13 | 46544580  | C | T | 0.051948052 | ZC3H13    | ENST00000282007_r73 | c.2489 G>A      | p.G830E  | MISSENSE         |
| MA4_22R | Chr13 | 50059823  | C | T | 0.055813954 | SETDB2    | ENST00000317257_r73 | c.1576 C>T      | p.R526*  | NONSENSE         |
| MA4_22R | Chr13 | 79191089  | G | A | 0.051136364 | RNF219    | ENST00000282003_r73 | c.807 C>T       | p.S269S  | SILENT           |
| MA4_22R | Chr13 | 80911657  | C | T | 0.105263158 | SPRY2     | ENST00000377102_r73 | c.184 G>A       | p.V62I   | MISSENSE         |
| MA4_22R | Chr13 | 103317148 | C | T | 0.376146789 | TPP2      | ENST00000376065_r73 | c.3205 C>T      | p.R1069* | NONSENSE         |
| MA4_22R | Chr13 | 103388797 | C | T | 0.050724638 | CCDC168   | ENST00000322527_r73 | c.363 G>A       | p.E121E  | SILENT           |
| MA4_22R | Chr13 | 103710650 | C | T | 0.2         | SLC10A2   | ENST00000245312_r73 | c.460 G>A       | p.D154N  | MISSENSE         |
| MA4_22R | Chr13 | 110436664 | G | A | 0.057142857 | IRS2      | ENST00000375856_r73 | c.1737 C>T      | p.T579T  | SILENT           |
| MA4_22R | Chr13 | 111927085 | A | T | 0.057692308 | ARHGGEF7  | ENST00000317133_r73 | c.1220 A>T      | p.H407L  | MISSENSE         |
| MA4_22R | Chr16 | 1536065   | C | T | 0.050847458 | PTX4      | ENST00000293922_r73 | c.1297 G>A      | p.E433K  | MISSENSE         |
| MA4_22R | Chr16 | 2293382   | G | A | 0.060240964 | ECI1      | ENST00000301729_r73 | c.500 C>T       | p.A167V  | MISSENSE         |
| MA4_22R | Chr16 | 3493148   | C | T | 0.1         | ZNF597    | ENST00000301744_r73 | c.6 G>A         | p.A2A    | SILENT           |
| MA4_22R | Chr16 | 4033331   | C | T | 0.069565217 | ADCY9     | ENST00000294016_r73 | c.2421 G>A      | p.L807L  | SILENT           |
| MA4_22R | Chr18 | 5397114   | C | G | 0.059259259 | EPB41L3   | ENST00000341928_r73 | c.2784 G>C      | p.E928D  | MISSENSE         |
| MA4_22R | Chr18 | 9221872   | A | G | 0.054054054 | ANKRD12   | ENST00000262126_r73 | c.818 A>G       | p.H273R  | MISSENSE         |
| MA4_22R | Chr18 | 21152144  | C | T | 0.05        | NPC1      | ENST00000269228_r73 | c.181 G>A       | p.E61K   | MISSENSE         |
| MA4_22R | Chr18 | 34349352  | G | A | 0.105769231 | FHOD3     | ENST00000257209_r73 | c.4200 G>A      | p.P1400P | SILENT           |
| MA4_22R | Chr18 | 34740289  | G | A | 0.089108911 | KIAA1328  | ENST00000280020_r73 | c.1359 G>A      | p.M453I  | MISSENSE         |
| MA4_22R | Chr18 | 47796189  | C | A | 0.108695652 | MBD1      | ENST00000353909_r73 | Exon 16 - 1 G>T | -        | ESSENTIAL_SPLICE |
| MA4_22R | Chr18 | 59774078  | C | T | 0.058333333 | PIGN      | ENST00000357637_r73 | c.1711 G>A      | p.G571R  | MISSENSE         |
| MA4_22R | Chr18 | 60036630  | G | A | 0.28        | TNFRSF11A | ENST00000586569_r73 | c.1480 G>A      | p.E494K  | MISSENSE         |
| MA4_22R | Chr18 | 70209141  | G | A | 0.284090909 | CBLN2     | ENST00000585159_r73 | c.255 C>T       | p.S85S   | SILENT           |
| MA4_22R | Chr16 | 11845214  | C | T | 0.068965517 | ZC3H7A    | ENST00000396516_r73 | c.2875 G>A      | p.D959N  | MISSENSE         |
| MA4_22R | Chr16 | 15692718  | C | A | 0.11627907  | KIAA0430  | ENST00000396368_r73 | c.4977 G>T      | p.E1659D | MISSENSE         |
| MA4_22R | Chr16 | 20335355  | G | A | 0.25        | GP2       | ENST00000302555_r73 | c.318 C>T       | p.T106T  | SILENT           |
| MA4_22R | Chr16 | 20362003  | G | A | 0.059701493 | UMOD      | ENST00000570689_r73 | c.57 C>T        | p.I19I   | SILENT           |
| MA4_22R | Chr16 | 22092160  | G | C | 0.058823529 | C16orf52  | ENST00000542527_r73 | c.463 G>C       | p.V155L  | MISSENSE         |
| MA4_22R | Chr16 | 30020553  | G | A | 0.098765432 | DOC2A     | ENST00000350119_r73 | c.387 C>T       | p.V129V  | SILENT           |
| MA4_22R | Chr16 | 31336632  | G | A | 0.75        | ITGAM     | ENST00000287497_r73 | c.2412 G>A      | p.V804V  | SILENT           |
| MA4_22R | Chr16 | 53358011  | G | A | 0.169811321 | CHD9      | ENST00000566029_r73 | c.7850 G>A      | p.R2617Q | MISSENSE         |
| MA4_22R | Chr16 | 69177089  | G | A | 0.056818182 | CIRH1A    | ENST00000314423_r73 | c.535 G>A       | p.V179I  | MISSENSE         |
| MA4_22R | Chr16 | 70843889  | G | A | 0.086956522 | HYDIN     | ENST00000393567_r73 | c.14680 C>T     | p.Q4894* | NONSENSE         |
| MA4_22R | Chr16 | 75575261  | C | T | 0.112676056 | TMEM231   | ENST00000258173_r73 | c.757 G>A       | p.V253M  | MISSENSE         |



Sheet1

|         |       |           |   |   |             |          |                     |        |     |          |          |
|---------|-------|-----------|---|---|-------------|----------|---------------------|--------|-----|----------|----------|
| MA4_22R | Chr16 | 79245676  | G | A | 0.0625      | WVOX     | ENST00000566780_r73 | c.1228 | G>A | p.G410S  | MISSENSE |
| MA4_22R | Chr16 | 84473064  | G | C | 0.283783784 | ATP2C2   | ENST00000262429_r73 | c.1143 | G>C | p.T381T  | SILENT   |
| MA4_22R | Chr16 | 88747917  | G | A | 0.066666667 | SNAI3    | ENST00000332281_r73 | c.282  | C>T | p.D94D   | SILENT   |
| MA4_22R | Chr16 | 89787187  | G | A | 0.192307692 | VPS9D1   | ENST00000389386_r73 | c.83   | C>T | p.T28I   | MISSENSE |
| MA4_22R | Chr6  | 8015908   | C | T | 0.050847458 | BLOC1S5  | ENST00000397457_r73 | c.538  | G>A | p.D180N  | MISSENSE |
| MA4_22R | Chr6  | 16306741  | G | A | 0.051813472 | ATXN1    | ENST00000244769_r73 | c.2267 | C>T | p.P756L  | MISSENSE |
| MA4_22R | Chr6  | 22292797  | G | C | 0.204081633 | PRL      | ENST00000306482_r73 | c.282  | C>G | p.P94P   | SILENT   |
| MA4_22R | Chr6  | 29455181  | T | C | 0.058252427 | MAS1L    | ENST00000377127_r73 | c.499  | A>G | p.I167V  | MISSENSE |
| MA4_22R | Chr6  | 43322744  | C | T | 0.097560976 | ZNF318   | ENST00000361428_r73 | c.2328 | G>A | p.P776P  | SILENT   |
| MA4_22R | Chr6  | 49518654  | C | T | 0.339622642 | C6orf141 | ENST00000414696_r73 | c.149  | C>T | p.A50V   | MISSENSE |
| MA4_22R | Chr6  | 72975190  | G | T | 0.14        | RIMS1    | ENST00000521978_r73 | c.3292 | G>T | p.D1098Y | MISSENSE |
| MA4_22R | Chr6  | 76660399  | G | A | 0.053763441 | IMPG1    | ENST00000369950_r73 | c.1704 | C>T | p.P568P  | SILENT   |
| MA4_22R | Chr6  | 102376485 | G | A | 0.057553957 | GRIK2    | ENST00000421544_r73 | c.2063 | G>A | p.G688D  | MISSENSE |
| MA4_22R | Chr6  | 109274465 | G | A | 0.068627451 | ARMC2    | ENST00000392644_r73 | c.1826 | G>A | p.R609H  | MISSENSE |
| MA4_22R | Chr6  | 112461037 | G | A | 0.062015504 | LAMA4    | ENST00000230538_r73 | c.3027 | C>T | p.A1009A | SILENT   |
| MA4_22R | Chr6  | 117859847 | G | A | 0.071942446 | DCBLD1   | ENST00000296955_r73 | c.825  | G>A | p.S275S  | SILENT   |
| MA4_22R | Chr6  | 131481326 | C | A | 0.111111111 | AKAP7    | ENST00000431975_r73 | c.279  | C>A | p.I93I   | SILENT   |
| MA4_22R | Chr6  | 131927620 | C | T | 0.061946903 | MED23    | ENST00000354577_r73 | c.1384 | G>A | p.E462K  | MISSENSE |
| MA4_22R | Chr6  | 139488186 | G | A | 0.067961165 | HECA     | ENST00000367658_r73 | c.1037 | G>A | p.R346Q  | MISSENSE |
| MA4_22R | Chr6  | 147704066 | G | A | 0.088235294 | STXBP5   | ENST00000367481_r73 | c.3238 | G>A | p.G1080S | MISSENSE |
| MA4_22R | Chr6  | 148865271 | G | A | 0.259541985 | SASH1    | ENST00000367467_r73 | c.2665 | G>A | p.D889N  | MISSENSE |
| MA4_22R | Chr6  | 151694763 | C | G | 0.3125      | ZBTB2    | ENST00000325144_r73 | c.10   | G>C | p.A4P    | MISSENSE |
| MA4_22R | Chr6  | 155450464 | A | T | 0.061068702 | TIAM2    | ENST00000461783_r73 | c.107  | A>T | p.H36L   | MISSENSE |
| MA4_22R | Chr6  | 161016412 | G | A | 0.052132701 | LPA      | ENST00000316300_r73 | c.3443 | C>T | p.P1148L | MISSENSE |
| MA4_22R | Chr6  | 165844942 | C | G | 0.052631579 | PDE10A   | ENST00000539869_r73 | c.712  | G>C | p.A238P  | MISSENSE |
| MA4_22R | ChrX  | 15593791  | C | T | 0.077777778 | ACE2     | ENST00000252519_r73 | c.1440 | G>A | p.M480I  | MISSENSE |
| MA4_22R | ChrX  | 16627715  | G | T | 0.135135135 | CTPS2    | ENST00000359276_r73 | c.1640 | C>A | p.A547E  | MISSENSE |
| MA4_22R | ChrX  | 18622441  | G | A | 0.144927536 | CDKL5    | ENST00000379996_r73 | c.1397 | G>A | p.R466Q  | MISSENSE |
| MA4_22R | ChrX  | 29301132  | G | T | 0.153061225 | IL1RAPL1 | ENST00000378993_r73 | c.160  | G>T | p.A54S   | MISSENSE |
| MA4_22R | ChrX  | 46747095  | A | T | 0.102040816 | CXorf31  | ENST00000377879_r73 | c.170  | T>A | p.V57E   | MISSENSE |
| MA4_22R | ChrX  | 48666668  | C | A | 0.123595506 | HDAC6    | ENST00000334136_r73 | c.741  | C>A | p.V247V  | SILENT   |
| MA4_22R | ChrX  | 54950100  | G | T | 0.101694915 | TRO      | ENST00000173898_r73 | c.1135 | G>T | p.E379*  | NONSENSE |
| MA4_22R | ChrX  | 54960268  | G | A | 0.710526316 | PFKFB1   | ENST00000375006_r73 | c.1342 | C>T | p.R448W  | MISSENSE |
| MA4_22R | ChrX  | 55047547  | G | A | 0.269230769 | ALAS2    | ENST00000396198_r73 | c.537  | C>T | p.S179S  | SILENT   |
| MA4_22R | ChrX  | 57021244  | C | T | 0.417582418 | SPIN3    | ENST00000374919_r73 | c.137  | G>A | p.R46Q   | MISSENSE |
| MA4_22R | ChrX  | 63411097  | G | T | 0.125       | AMER1    | ENST00000330258_r73 | c.2070 | C>A | p.S690R  | MISSENSE |
| MA4_22R | ChrX  | 69507161  | C | T | 0.727272727 | PDZD11   | ENST00000239666_r73 | c.353  | G>A | p.R118H  | MISSENSE |

Sheet1

|         |      |           |   |   |             |          |                     |              |          |                  |
|---------|------|-----------|---|---|-------------|----------|---------------------|--------------|----------|------------------|
| MA4_22R | ChrX | 70316558  | G | A | 0.1         | FOXO4    | ENST00000374259_r73 | c.180 G>A    | p.T60T   | SILENT           |
| MA4_22R | ChrX | 76890137  | G | T | 0.112781955 | ATRX     | ENST00000373344_r73 | c.4757 C>A   | p.P1586Q | MISSENSE         |
| MA4_22R | Chr3 | 11059024  | G | A | 0.072289157 | SLC6A1   | ENST00000287766_r73 | c.127 G>A    | p.D43N   | MISSENSE         |
| MA4_22R | Chr3 | 14508035  | C | T | 0.064220184 | SLC6A6   | ENST00000454876_r73 | c.744 C>T    | p.F248F  | SILENT           |
| MA4_22R | Chr3 | 19959819  | C | T | 0.057142857 | EFHB     | ENST00000295824_r73 | c.1082 G>A   | p.R361Q  | MISSENSE         |
| MA4_22R | Chr3 | 23250290  | G | C | 0.052631579 | UBE2E2   | ENST00000425792_r73 | c.100 G>C    | p.E34Q   | MISSENSE         |
| MA4_22R | Chr3 | 28365666  | C | T | 0.061068702 | AZI2     | ENST00000479665_r73 | c.1046 G>A   | p.W349*  | NONSENSE         |
| MA4_22R | Chr3 | 31710219  | C | T | 0.056701031 | OSBPL10  | ENST00000396556_r73 | c.2011 G>A   | p.E671K  | MISSENSE         |
| MA4_22R | Chr3 | 32726979  | G | A | 0.056603774 | CNOT10   | ENST00000331889_r73 | Exon 1 5 G>A | -        | ESSENTIAL_SPLICE |
| MA4_22R | ChrX | 96013231  | C | T | 0.05019305  | DIAPH2   | ENST00000373049_r73 | c.421 C>T    | p.Q141*  | NONSENSE         |
| MA4_22R | ChrX | 105167153 | A | T | 0.096491228 | NRK      | ENST00000243300_r73 | c.2654 A>T   | p.Y885F  | MISSENSE         |
| MA4_22R | ChrX | 105179175 | C | T | 0.08045977  | NRK      | ENST00000243300_r73 | c.3513 C>T   | p.F1171F | SILENT           |
| MA4_22R | ChrX | 106844025 | C | A | 0.152173913 | FRMPD3   | ENST00000439554_r73 | c.2699 C>A   | p.S900*  | NONSENSE         |
| MA4_22R | ChrX | 119670796 | G | T | 0.103448276 | CUL4B    | ENST00000371322_r73 | c.2032 C>A   | p.H678N  | MISSENSE         |
| MA4_22R | ChrX | 132161058 | G | C | 0.074766355 | USP26    | ENST00000370832_r73 | c.1191 C>G   | p.N397K  | MISSENSE         |
| MA4_22R | ChrX | 140993500 | G | A | 0.062015504 | MAGEC1   | ENST00000285879_r73 | c.310 G>A    | p.E104K  | MISSENSE         |
| MA4_22R | ChrX | 148797302 | C | T | 0.125       | MAGEA11  | ENST00000355220_r73 | c.231 C>T    | p.P77P   | SILENT           |
| MA4_22R | ChrX | 150573396 | G | T | 0.103448276 | VMA21    | ENST00000330374_r73 | c.172 G>T    | p.G58W   | MISSENSE         |
| MA4_22R | ChrX | 153171301 | C | A | 0.133333333 | AVPR2    | ENST00000358927_r73 | c.341 C>A    | p.A114D  | MISSENSE         |
| MA4_22R | Chr3 | 38318437  | C | T | 0.060606061 | SLC22A13 | ENST00000311856_r73 | c.1381 C>T   | p.R461W  | MISSENSE         |
| MA4_22R | Chr3 | 39228715  | G | C | 0.050761421 | XIRP1    | ENST00000396251_r73 | c.2222 C>G   | p.A741G  | MISSENSE         |
| MA4_22R | Chr3 | 44762890  | G | C | 0.32173913  | ZNF502   | ENST00000436624_r73 | c.581 G>C    | p.R194P  | MISSENSE         |
| MA4_22R | Chr3 | 49679891  | G | C | 0.070422535 | BSN      | ENST00000296452_r73 | c.824 G>C    | p.G275A  | MISSENSE         |
| MA4_22R | Chr3 | 49698362  | C | T | 0.345864662 | BSN      | ENST00000296452_r73 | c.9084 C>T   | p.P3028P | SILENT           |
| MA4_22R | Chr3 | 50220929  | C | T | 0.0625      | SEMA3F   | ENST00000002829_r73 | c.1165 C>T   | p.H389Y  | MISSENSE         |
| MA4_22R | Chr3 | 50418192  | G | A | 0.433333333 | CACNA2D2 | ENST00000424201_r73 | c.829 C>T    | p.R277*  | NONSENSE         |
| MA4_22R | Chr3 | 51663360  | C | T | 0.231527094 | RAD54L2  | ENST00000409535_r73 | c.352 C>T    | p.R118W  | MISSENSE         |
| MA4_22R | Chr3 | 61975389  | G | A | 0.051724138 | PTPRG    | ENST00000474889_r73 | c.281 G>A    | p.R94H   | MISSENSE         |
| MA4_22R | Chr3 | 62189178  | C | T | 0.067484663 | PTPRG    | ENST00000474889_r73 | c.1709 C>T   | p.P570L  | MISSENSE         |
| MA4_22R | Chr3 | 64589638  | A | T | 0.06097561  | ADAMTS9  | ENST00000498707_r73 | c.3707 T>A   | p.V1236E | MISSENSE         |
| MA4_22R | Chr3 | 89521697  | C | T | 0.050314465 | EPHA3    | ENST00000336596_r73 | c.2774 C>T   | p.T925I  | MISSENSE         |
| MA4_22R | Chr3 | 107799004 | G | A | 0.063583815 | CD47     | ENST00000355354_r73 | c.234 C>T    | p.P78P   | SILENT           |
| MA4_22R | Chr3 | 107799088 | G | A | 0.058139535 | CD47     | ENST00000355354_r73 | c.150 C>T    | p.N50N   | SILENT           |
| MA4_22R | Chr3 | 119666194 | C | T | 0.277227723 | GSK3B    | ENST00000264235_r73 | c.287 G>A    | p.R96Q   | MISSENSE         |
| MA4_22R | Chr3 | 122259629 | C | T | 0.054945055 | PARP9    | ENST00000477522_r73 | c.1455 G>A   | p.M485I  | MISSENSE         |
| MA4_22R | Chr3 | 128345586 | C | T | 0.051724138 | RPN1     | ENST00000296255_r73 | c.1126 G>A   | p.E376K  | MISSENSE         |
| MA4_22R | Chr3 | 130162344 | C | T | 0.055555556 | COL6A5   | ENST00000312481_r73 | c.6512 C>T   | p.P2171L | MISSENSE         |

Sheet1

|         |       |           |   |   |             |          |                     |            |          |          |
|---------|-------|-----------|---|---|-------------|----------|---------------------|------------|----------|----------|
| MA4_22R | Chr3  | 130318627 | C | T | 0.06741573  | COL6A6   | ENST00000358511_r73 | c.4626 C>T | p.P1542P | SILENT   |
| MA4_22R | Chr3  | 138762690 | C | T | 0.305785124 | PRR23C   | ENST00000413199_r73 | c.773 G>A  | p.R258H  | MISSENSE |
| MA4_22R | Chr3  | 142031593 | T | A | 0.058333333 | XRN1     | ENST00000264951_r73 | c.4665 A>T | p.I1555I | SILENT   |
| MA4_22R | Chr3  | 142537239 | T | A | 0.061728395 | PCOLCE2  | ENST00000295992_r73 | c.1186 A>T | p.I396F  | MISSENSE |
| MA4_22R | Chr3  | 142741745 | C | T | 0.068181818 | U2SURP   | ENST00000473835_r73 | c.1069 C>T | p.P357S  | MISSENSE |
| MA4_22R | Chr3  | 142741765 | A | T | 0.088235294 | U2SURP   | ENST00000473835_r73 | c.1089 A>T | p.I363I  | SILENT   |
| MA4_22R | Chr3  | 160233267 | C | T | 0.065934066 | KPNA4    | ENST00000334256_r73 | c.1005 G>A | p.L335L  | SILENT   |
| MA4_22R | Chr3  | 164714347 | C | T | 0.08411215  | SI       | ENST00000264382_r73 | c.4668 G>A | p.R1556R | SILENT   |
| MA4_22R | Chr3  | 183907373 | C | T | 0.068965517 | ABCF3    | ENST00000429586_r73 | c.1142 C>T | p.S381F  | MISSENSE |
| MA4_22R | Chr3  | 191098013 | G | A | 0.09009009  | CCDC50   | ENST00000392455_r73 | c.514 G>A  | p.E172K  | MISSENSE |
| MA4_22R | Chr3  | 195487888 | C | T | 0.063157895 | MUC4     | ENST00000349607_r73 | c.1854 G>A | p.W618*  | NONSENSE |
| MA4_22R | Chr3  | 196054298 | G | A | 0.103896104 | TM4SF19  | ENST00000442633_r73 | c.164 C>T  | p.A55V   | MISSENSE |
| MA4_22R | Chr3  | 196215543 | G | A | 0.059405941 | RNF168   | ENST00000318037_r73 | c.313 C>T  | p.Q105*  | NONSENSE |
| MA4_22R | Chr9  | 742270    | G | A | 0.059259259 | KANK1    | ENST00000382303_r73 | c.3762 G>A | p.L1254L | SILENT   |
| MA4_22R | Chr9  | 8319853   | C | T | 0.361111111 | PTPRD    | ENST00000381196_r73 | c.5648 G>A | p.R1883Q | MISSENSE |
| MA4_22R | Chr9  | 17415795  | C | T | 0.147058824 | CNTLN    | ENST00000380647_r73 | c.2806 C>T | p.H936Y  | MISSENSE |
| MA4_22R | Chr9  | 37442512  | G | A | 0.056910569 | ZBTB5    | ENST00000307750_r73 | c.37 C>T   | p.Q13*   | NONSENSE |
| MA4_22R | Chr9  | 72472880  | G | C | 0.058558559 | C9orf135 | ENST00000377197_r73 | c.436 G>C  | p.D146H  | MISSENSE |
| MA4_22R | Chr9  | 84268926  | G | A | 0.18        | TLE1     | ENST00000376499_r73 | c.260 C>T  | p.T87M   | MISSENSE |
| MA4_22R | Chr9  | 100862295 | C | T | 0.059259259 | TRIM14   | ENST00000375098_r73 | c.455 G>A  | p.R152K  | MISSENSE |
| MA4_22R | Chr9  | 101812146 | C | T | 0.06185567  | COL15A1  | ENST00000375001_r73 | c.2873 C>T | p.P958L  | MISSENSE |
| MA4_22R | Chr9  | 102861104 | G | A | 0.056074766 | ERP44    | ENST00000262455_r73 | c.19 C>T   | p.L7L    | SILENT   |
| MA4_22R | Chr9  | 111965991 | G | A | 0.062962963 | EPB41L4B | ENST00000374566_r73 | c.1898 C>T | p.P633L  | MISSENSE |
| MA4_22R | Chr9  | 112200416 | C | T | 0.273381295 | PTPN3    | ENST00000374541_r73 | c.565 G>A  | p.E189K  | MISSENSE |
| MA4_22R | Chr9  | 113265477 | G | C | 0.052173913 | SVEP1    | ENST00000401783_r73 | c.1324 C>G | p.R442G  | MISSENSE |
| MA4_22R | Chr9  | 126139223 | C | T | 0.315789474 | CRB2     | ENST00000373631_r73 | c.3740 C>T | p.A1247V | MISSENSE |
| MA4_22R | Chr12 | 2926453   | G | A | 0.173913044 | ITFG2    | ENST00000228799_r73 | c.161 G>A  | p.R54Q   | MISSENSE |
| MA4_22R | Chr12 | 7469851   | G | A | 0.162337662 | ACSM4    | ENST00000399422_r73 | c.739 G>A  | p.G247S  | MISSENSE |
| MA4_22R | Chr12 | 11138988  | A | T | 0.164874552 | TAS2R50  | ENST00000506868_r73 | c.472 T>A  | p.Y158N  | MISSENSE |
| MA4_22R | Chr12 | 23699323  | C | T | 0.064102564 | SOX5     | ENST00000546136_r73 | c.1485 G>A | p.L495L  | SILENT   |
| MA4_22R | Chr12 | 32137414  | G | A | 0.050420168 | KIAA1551 | ENST00000312561_r73 | c.3525 G>A | p.L1175L | SILENT   |
| MA4_22R | Chr12 | 49434127  | C | T | 0.066666667 | KMT2D    | ENST00000301067_r73 | c.7426 G>A | p.E2476K | MISSENSE |
| MA4_22R | Chr12 | 49580433  | G | A | 0.068376068 | TUBA1A   | ENST00000301071_r73 | c.187 C>T  | p.P63S   | MISSENSE |
| MA4_22R | Chr12 | 51213482  | G | T | 0.142857143 | ATF1     | ENST00000262053_r73 | c.736 G>T  | p.A246S  | MISSENSE |
| MA4_22R | Chr12 | 53432146  | G | A | 0.063157895 | EIF4B    | ENST00000262056_r73 | c.1527 G>A | p.G509G  | SILENT   |
| MA4_22R | Chr12 | 53701467  | G | A | 0.072289157 | AAAS     | ENST00000209873_r73 | c.1447 C>T | p.P483S  | MISSENSE |
| MA4_22R | Chr12 | 54757225  | T | A | 0.053435115 | GPR84    | ENST00000267015_r73 | c.411 A>T  | p.I137I  | SILENT   |

Sheet1

|         |       |           |   |   |             |           |                     |               |          |                  |
|---------|-------|-----------|---|---|-------------|-----------|---------------------|---------------|----------|------------------|
| MA4_22R | Chr12 | 55846797  | C | T | 0.052173913 | OR6C2     | ENST00000322678_r73 | c.800 C>T     | p.A267V  | MISSENSE         |
| MA4_22R | Chr12 | 56119655  | C | T | 0.068965517 | CD63      | ENST00000546939_r73 | c.347 G>A     | p.W116*  | NONSENSE         |
| MA4_22R | Chr9  | 130475050 | G | C | 0.063291139 | C9orf117  | ENST00000373295_r73 | c.1200 G>C    | p.M400I  | MISSENSE         |
| MA4_22R | Chr9  | 130550582 | C | A | 0.102941177 | CDK9      | ENST00000373264_r73 | c.522 C>A     | p.F174L  | MISSENSE         |
| MA4_22R | Chr9  | 130914258 | C | T | 0.060606061 | LCN2      | ENST00000373017_r73 | c.429 C>T     | p.F143F  | SILENT           |
| MA4_22R | Chr12 | 59272846  | G | A | 0.098214286 | LRIG3     | ENST00000379141_r73 | c.1663 C>T    | p.R555*  | NONSENSE         |
| MA4_22R | Chr12 | 72023451  | C | T | 0.233870968 | ZFC3H1    | ENST00000378743_r73 | c.3764 G>A    | p.R1255Q | MISSENSE         |
| MA4_22R | Chr12 | 88479826  | G | T | 0.120481928 | CEP290    | ENST00000552810_r73 | c.4427 C>A    | p.S1476* | NONSENSE         |
| MA4_22R | Chr12 | 96273421  | C | T | 0.357142857 | CCDC38    | ENST00000344280_r73 | Exon 12 1 G>A | -        | ESSENTIAL_SPLICE |
| MA4_22R | Chr12 | 110820648 | C | G | 0.068376068 | ANAPC7    | ENST00000455511_r73 | c.1037 G>C    | p.G346A  | MISSENSE         |
| MA4_22R | Chr12 | 114374833 | C | T | 0.052631579 | RBM19     | ENST00000545145_r73 | c.2047 G>A    | p.D683N  | MISSENSE         |
| MA4_22R | Chr12 | 118298167 | C | T | 0.209302326 | KSR2      | ENST00000339824_r73 | c.250 G>A     | p.A84T   | MISSENSE         |
| MA4_22R | Chr12 | 121858394 | C | T | 0.073529412 | RNF34     | ENST00000361234_r73 | c.741 C>T     | p.S247S  | SILENT           |
| MA4_22R | Chr12 | 123782540 | C | T | 0.057553957 | SBNO1     | ENST00000602750_r73 | c.4021 G>A    | p.G1341R | MISSENSE         |
| MA4_22R | Chr12 | 133389991 | G | A | 0.103448276 | GOLGA3    | ENST00000450791_r73 | c.421 C>T     | p.P141S  | MISSENSE         |
| MA4_22R | Chr14 | 23884667  | G | T | 0.133333333 | MYH7      | ENST00000355349_r73 | c.5206 C>A    | p.Q1736K | MISSENSE         |
| MA4_22R | Chr14 | 36988571  | G | A | 0.14        | NKX2-1    | ENST00000354822_r73 | c.82 C>T      | p.R28C   | MISSENSE         |
| MA4_22R | Chr14 | 45633567  | G | T | 0.190476191 | FANCM     | ENST00000267430_r73 | c.1587 G>T    | p.V529V  | SILENT           |
| MA4_22R | Chr14 | 50666444  | G | C | 0.056179775 | SOS2      | ENST00000216373_r73 | c.475 C>G     | p.Q159E  | MISSENSE         |
| MA4_22R | Chr14 | 64520254  | C | T | 0.054945055 | SYNE2     | ENST00000344113_r73 | c.9623 C>T    | p.A3208V | MISSENSE         |
| MA4_22R | Chr14 | 64892545  | G | T | 0.101449275 | MTHFD1    | ENST00000555709_r73 | c.953 G>T     | p.S318I  | MISSENSE         |
| MA4_22R | Chr14 | 70839817  | C | T | 0.294736842 | SYNJ2BP   | ENST00000256366_r73 | c.329 G>A     | p.R110Q  | MISSENSE         |
| MA4_22R | Chr14 | 75290989  | G | A | 0.056338028 | YLPM1     | ENST00000325680_r73 | c.6142 G>A    | p.D2048N | MISSENSE         |
| MA4_22R | Chr14 | 77793187  | C | T | 0.072463768 | GSTZ1     | ENST00000216465_r73 | c.74 C>T      | p.A25V   | MISSENSE         |
| MA4_22R | Chr14 | 92790184  | C | T | 0.25        | SLC24A4   | ENST00000531433_r73 | c.10 C>T      | p.R4C    | MISSENSE         |
| MA4_22R | Chr14 | 94088559  | C | T | 0.166666667 | UNC79     | ENST00000256339_r73 | c.4449 C>T    | p.S1483S | SILENT           |
| MA4_22R | Chr14 | 94395244  | G | C | 0.52631579  | FAM181A   | ENST00000557719_r73 | c.613 G>C     | p.V205L  | MISSENSE         |
| MA4_22R | Chr14 | 100193004 | C | T | 0.36        | CYP46A1   | ENST00000261835_r73 | c.1443 C>T    | p.P481P  | SILENT           |
| MA4_22R | Chr14 | 102027983 | G | A | 0.275       | DIO3      | ENST00000510508_r73 | c.150 G>A     | p.P50P   | SILENT           |
| MA4_22R | Chr14 | 104639754 | C | T | 0.294736842 | KIF26A    | ENST00000423312_r73 | c.1771 C>T    | p.R591*  | NONSENSE         |
| MA4_22R | Chr14 | 106967286 | C | T | 0.063218391 | IGHV1-46  | ENST00000390622_r73 | c.114 G>A     | p.K38K   | SILENT           |
| MA4_22R | Chr15 | 37390309  | G | A | 0.159090909 | MEIS2     | ENST00000338564_r73 | c.104 C>T     | p.P35L   | MISSENSE         |
| MA4_22R | Chr15 | 48056943  | C | T | 0.214285714 | SEMA6D    | ENST00000558014_r73 | c.1206 C>T    | p.A402A  | SILENT           |
| MA4_22R | Chr15 | 48826377  | G | C | 0.237410072 | FBN1      | ENST00000316623_r73 | c.762 C>G     | p.P254P  | SILENT           |
| MA4_22R | Chr15 | 49309166  | G | A | 0.06763285  | SECISBP2L | ENST00000559471_r73 | c.1298 C>T    | p.P433L  | MISSENSE         |
| MA4_22R | Chr15 | 56435072  | C | T | 0.085271318 | RFX7      | ENST00000559847_r73 | c.14 G>A      | p.R5Q    | MISSENSE         |
| MA4_22R | Chr15 | 56974447  | C | T | 0.138888889 | ZNF280D   | ENST00000559237_r73 | Exon 9 5 G>A  | -        | ESSENTIAL_SPLICE |

Sheet1

|         |       |           |   |   |             |          |                     |                |          |                  |
|---------|-------|-----------|---|---|-------------|----------|---------------------|----------------|----------|------------------|
| MA4_22R | Chr15 | 63991133  | C | T | 0.068181818 | HERC1    | ENST00000443617_r73 | c.4699 G>A     | p.D1567N | MISSENSE         |
| MA4_22R | Chr15 | 64427004  | G | A | 0.366666667 | SNX1     | ENST00000261889_r73 | c.1363 G>A     | p.E455K  | MISSENSE         |
| MA4_22R | Chr15 | 65255961  | C | A | 0.166666667 | SPG21    | ENST00000204566_r73 | c.927 G>T      | p.*309Y  | STOP-LOST        |
| MA4_22R | Chr15 | 65822990  | G | C | 0.071428571 | PTPLAD1  | ENST00000261875_r73 | c.21 G>C       | p.T7T    | SILENT           |
| MA4_22R | Chr15 | 66206091  | G | A | 0.212121212 | MEGF11   | ENST00000409699_r73 | c.2694 C>T     | p.T898T  | SILENT           |
| MA4_22R | Chr15 | 67681345  | G | A | 0.078947368 | IQCH     | ENST00000335894_r73 | Exon 12 1 G>A  | -        | ESSENTIAL_SPLICE |
| MA4_22R | Chr11 | 71715718  | G | T | 0.146341463 | NUMA1    | ENST00000393695_r73 | c.5974 C>A     | p.L1992I | MISSENSE         |
| MA4_22R | Chr11 | 82443907  | C | T | 0.169491525 | FAM181B  | ENST00000329203_r73 | c.865 G>A      | p.V289M  | MISSENSE         |
| MA4_22R | Chr11 | 82893483  | G | T | 0.11627907  | PCF11    | ENST00000298281_r73 | c.4366 G>T     | p.E1456* | NONSENSE         |
| MA4_22R | Chr11 | 85623719  | C | T | 0.055900621 | CCDC83   | ENST00000280245_r73 | c.822 C>T      | p.T274T  | SILENT           |
| MA4_22R | Chr11 | 110450184 | G | T | 0.108910891 | ARHGAP20 | ENST00000260283_r73 | c.3486 C>A     | p.S1162R | MISSENSE         |
| MA4_22R | Chr11 | 116707031 | C | T | 0.0625      | APOA1    | ENST00000375320_r73 | c.297 G>A      | p.L99L   | SILENT           |
| MA4_22R | Chr11 | 117985906 | C | T | 0.058394161 | TMPRSS4  | ENST00000534111_r73 | c.1057 C>T     | p.R353W  | MISSENSE         |
| MA4_22R | Chr11 | 120176362 | G | A | 0.285714286 | POU2F3   | ENST00000260264_r73 | c.643 G>A      | p.G215R  | MISSENSE         |
| MA4_22R | Chr11 | 126110873 | G | A | 0.051851852 | FAM118B  | ENST00000533050_r73 | c.273 G>A      | p.Q91Q   | SILENT           |
| MA4_22R | Chr11 | 129727330 | C | T | 0.555555556 | TMEM45B  | ENST00000281441_r73 | c.693 C>T      | p.A231A  | SILENT           |
| MA4_22R | Chr21 | 27462366  | G | A | 0.64        | APP      | ENST00000346798_r73 | c.248 C>T      | p.T83I   | MISSENSE         |
| MA4_22R | Chr21 | 41684028  | T | A | 0.081967213 | DSCAM    | ENST00000400454_r73 | c.2042 A>T     | p.Q681L  | MISSENSE         |
| MA4_22R | Chr21 | 43531640  | C | T | 0.055214724 | UMODL1   | ENST00000400427_r73 | c.2092 C>T     | p.P698S  | MISSENSE         |
| MA4_22R | Chr21 | 45089798  | G | A | 0.1         | RRP1B    | ENST00000340648_r73 | c.164 G>A      | p.W55*   | NONSENSE         |
| MA4_22R | Chr21 | 45563146  | T | A | 0.106796117 | C21orf33 | ENST00000291577_r73 | c.581 T>A      | p.V194E  | MISSENSE         |
| MA4_22R | Chr21 | 47531483  | C | T | 0.227027027 | COL6A2   | ENST00000300527_r73 | c.93 C>T       | p.T31T   | SILENT           |
| MA4_22R | Chr7  | 1785228   | C | T | 0.24516129  | ELFN1    | ENST00000424383_r73 | c.996 C>T      | p.T332T  | SILENT           |
| MA4_22R | Chr15 | 74336773  | G | A | 0.075757576 | PML      | ENST00000268058_r73 | c.2073 G>A     | p.L691L  | SILENT           |
| MA4_22R | Chr15 | 75499024  | C | T | 0.060150376 | C15orf39 | ENST00000360639_r73 | c.635 C>T      | p.P212L  | MISSENSE         |
| MA4_22R | Chr15 | 76587987  | G | A | 0.061728395 | ETFA     | ENST00000557943_r73 | c.131 C>T      | p.A44V   | MISSENSE         |
| MA4_22R | Chr15 | 84651111  | G | A | 0.051470588 | ADAMTSL3 | ENST00000286744_r73 | c.2731 G>A     | p.E911K  | MISSENSE         |
| MA4_22R | Chr15 | 89444866  | C | T | 0.097087379 | MFGE8    | ENST00000268151_r73 | c.786 G>A      | p.W262*  | NONSENSE         |
| MA4_22R | Chr15 | 91303904  | C | T | 0.051282051 | BLM      | ENST00000355112_r73 | c.1301 C>T     | p.S434L  | MISSENSE         |
| MA4_22R | Chr15 | 99701968  | G | A | 0.0625      | TTC23    | ENST00000394132_r73 | c.970 C>T      | p.L324L  | SILENT           |
| MA4_22R | Chr20 | 2097332   | G | T | 0.170731707 | STK35    | ENST00000381482_r73 | c.913 G>T      | p.A305S  | MISSENSE         |
| MA4_22R | Chr20 | 2321189   | G | A | 0.055555556 | TGM3     | ENST00000381458_r73 | c.2044 G>A     | p.A682T  | MISSENSE         |
| MA4_22R | Chr20 | 2841651   | C | T | 0.055045872 | VPS16    | ENST00000380445_r73 | c.666 C>T      | p.F222F  | SILENT           |
| MA4_22R | Chr20 | 3759095   | C | T | 0.067567568 | SPEF1    | ENST00000379756_r73 | c.576 G>A      | p.E192E  | SILENT           |
| MA4_22R | Chr20 | 5166403   | G | A | 0.051020408 | CDS2     | ENST00000460006_r73 | Exon 9 - 1 G>A | -        | ESSENTIAL_SPLICE |
| MA4_22R | Chr20 | 16387048  | C | T | 0.053475936 | KIF16B   | ENST00000354981_r73 | c.1666 G>A     | p.E556K  | MISSENSE         |
| MA4_22R | Chr20 | 25002122  | G | A | 0.607843137 | ACSS1    | ENST00000323482_r73 | c.1011 C>T     | p.I337I  | SILENT           |

Sheet1

|         |       |           |   |   |             |           |                     |            |          |          |
|---------|-------|-----------|---|---|-------------|-----------|---------------------|------------|----------|----------|
| MA4_22R | Chr20 | 31044159  | G | C | 0.065789474 | C20orf112 | ENST00000359676_r73 | c.149 C>G  | p.S50C   | MISSENSE |
| MA4_22R | Chr20 | 33519918  | G | T | 0.101010101 | GSS       | ENST00000216951_r73 | c.853 C>A  | p.L285M  | MISSENSE |
| MA4_22R | Chr20 | 35125427  | C | G | 0.095238095 | DLGAP4    | ENST00000373913_r73 | c.1968 C>G | p.P656P  | SILENT   |
| MA4_22R | Chr20 | 37137733  | A | T | 0.066455696 | RALGAPB   | ENST00000262879_r73 | c.754 A>T  | p.T252S  | MISSENSE |
| MA4_22R | Chr20 | 37137734  | C | T | 0.052307692 | RALGAPB   | ENST00000262879_r73 | c.755 C>T  | p.T252I  | MISSENSE |
| MA4_22R | Chr20 | 42907808  | G | A | 0.115789474 | GDAP1L1   | ENST00000342560_r73 | c.972 G>A  | p.S324S  | SILENT   |
| MA4_22R | Chr20 | 44180783  | C | T | 0.051792829 | WFDC8     | ENST00000357199_r73 | c.608 G>A  | p.R203H  | MISSENSE |
| MA4_22R | Chr20 | 44515285  | C | A | 0.101123596 | SPATA25   | ENST00000372519_r73 | c.555 G>T  | p.M185I  | MISSENSE |
| MA4_22R | Chr20 | 45174777  | C | A | 0.111111111 | OCSTAMP   | ENST00000279028_r73 | c.236 G>T  | p.G79V   | MISSENSE |
| MA4_22R | Chr20 | 45192082  | C | T | 0.054945055 | SLC13A3   | ENST00000279027_r73 | c.1603 G>A | p.A535T  | MISSENSE |
| MA4_22R | Chr20 | 46279756  | C | T | 0.72        | NCOA3     | ENST00000372004_r73 | c.3670 C>T | p.Q1224* | NONSENSE |
| MA4_22R | Chr20 | 52774123  | G | A | 0.057971015 | CYP24A1   | ENST00000216862_r73 | c.1238 C>T | p.T413I  | MISSENSE |
| MA4_22R | Chr20 | 57466842  | G | T | 0.103448276 | GNAS      | ENST00000371095_r73 | c.61 G>T   | p.E21*   | NONSENSE |
| MA4_22R | Chr20 | 58567563  | G | A | 0.363013699 | CDH26     | ENST00000348616_r73 | c.1414 G>A | p.A472T  | MISSENSE |
| MA4_22R | Chr20 | 61537367  | G | A | 0.082352941 | DIDO1     | ENST00000395343_r73 | c.1460 C>T | p.A487V  | MISSENSE |
| MA4_22R | Chr4  | 677412    | C | T | 0.103896104 | MFSD7     | ENST00000322224_r73 | c.979 G>A  | p.V327M  | MISSENSE |
| MA4_22R | Chr4  | 737326    | G | A | 0.06185567  | PCGF3     | ENST00000362003_r73 | c.327 G>A  | p.K109K  | SILENT   |
| MA4_22R | Chr4  | 3184176   | C | A | 0.101694915 | HTT       | ENST00000355072_r73 | c.4845 C>A | p.L1615L | SILENT   |
| MA4_22R | Chr4  | 6325146   | C | T | 0.053846154 | PPP2R2C   | ENST00000335585_r73 | c.1227 G>A | p.L409L  | SILENT   |
| MA4_22R | Chr8  | 8749575   | G | A | 0.066037736 | MFHAS1    | ENST00000276282_r73 | c.994 C>T  | p.R332C  | MISSENSE |
| MA4_22R | Chr8  | 12879165  | C | T | 0.06884058  | KIAA1456  | ENST00000524591_r73 | c.977 C>T  | p.A326V  | MISSENSE |
| MA4_22R | Chr8  | 25191643  | A | C | 0.240963855 | DOCK5     | ENST00000276440_r73 | c.2123 A>C | p.K708T  | MISSENSE |
| MA4_22R | Chr8  | 28991612  | G | C | 0.082352941 | KIF13B    | ENST00000524189_r73 | c.2729 C>G | p.S910C  | MISSENSE |
| MA4_22R | Chr8  | 33310939  | C | T | 0.223880597 | FUT10     | ENST00000327671_r73 | c.171 G>A  | p.T57T   | SILENT   |
| MA4_22R | Chr8  | 38684879  | C | T | 0.057377049 | TACC1     | ENST00000520615_r73 | c.1061 C>T | p.S354L  | MISSENSE |
| MA4_22R | Chr8  | 40683102  | G | T | 0.12962963  | ZMAT4     | ENST00000315769_r73 | c.94 C>A   | p.H32N   | MISSENSE |
| MA4_22R | Chr8  | 57354239  | G | A | 0.088328076 | PENK      | ENST00000314922_r73 | c.396 C>T  | p.L132L  | SILENT   |
| MA4_22R | Chr8  | 61767063  | C | T | 0.06097561  | CHD7      | ENST00000423902_r73 | c.6917 C>T | p.A2306V | MISSENSE |
| MA4_22R | Chr8  | 67507825  | G | T | 0.103896104 | MYBL1     | ENST00000522677_r73 | c.680 C>A  | p.P227H  | MISSENSE |
| MA4_22R | Chr8  | 94746016  | G | A | 0.271676301 | RBM12B    | ENST00000399300_r73 | c.2623 C>T | p.P875S  | MISSENSE |
| MA4_22R | Chr8  | 107726089 | C | T | 0.065573771 | OXR1      | ENST00000531443_r73 | c.1832 C>T | p.P611L  | MISSENSE |
| MA4_22R | Chr8  | 125094647 | C | T | 0.285714286 | FER1L6    | ENST00000522917_r73 | c.4339 C>T | p.R1447C | MISSENSE |
| MA4_22R | Chr8  | 143618426 | G | A | 0.4375      | BAI1      | ENST00000517894_r73 | c.3649 G>A | p.G1217S | MISSENSE |
| MA4_22R | Chr10 | 14991042  | C | G | 0.109090909 | DCLRE1C   | ENST00000378278_r73 | c.154 G>C  | p.E52Q   | MISSENSE |
| MA4_22R | Chr10 | 20335922  | C | G | 0.054421769 | PLXDC2    | ENST00000377252_r73 | c.449 C>G  | p.S150C  | MISSENSE |
| MA4_22R | Chr10 | 38246468  | C | T | 0.4         | ZNF25     | ENST00000302609_r73 | c.22 G>A   | p.V8M    | MISSENSE |
| MA4_22R | Chr10 | 46967641  | C | G | 0.121875    | SYT15     | ENST00000503753_r73 | c.436 G>C  | p.G146R  | MISSENSE |

Sheet1

|         |       |           |   |   |             |            |                     |             |          |          |
|---------|-------|-----------|---|---|-------------|------------|---------------------|-------------|----------|----------|
| MA4_22R | Chr4  | 7043158   | C | T | 0.054901961 | CCDC96     | ENST00000310085_r73 | c.1508 G>A  | p.G503D  | MISSENSE |
| MA4_22R | Chr4  | 20599961  | G | A | 0.222222222 | SLIT2      | ENST00000504154_r73 | c.3635 G>A  | p.R1212Q | MISSENSE |
| MA4_22R | Chr4  | 25418062  | A | T | 0.05982906  | ANAPC4     | ENST00000315368_r73 | c.1917 A>T  | p.L639F  | MISSENSE |
| MA4_22R | Chr4  | 39515714  | C | T | 0.0875      | UGDH       | ENST00000316423_r73 | c.253 G>A   | p.V85I   | MISSENSE |
| MA4_22R | Chr4  | 48517088  | C | T | 0.063063063 | FRYL       | ENST00000503238_r73 | c.7894 G>A  | p.E2632K | MISSENSE |
| MA4_22R | Chr4  | 53610954  | C | T | 0.051724138 | ERVMER34-1 | ENST00000443173_r73 | c.734 G>A   | p.R245H  | MISSENSE |
| MA4_22R | Chr4  | 54348015  | C | T | 0.054545455 | LNX1       | ENST00000306888_r73 | c.1069 G>A  | p.E357K  | MISSENSE |
| MA4_22R | Chr4  | 56322146  | C | T | 0.097222222 | CLOCK      | ENST00000309964_r73 | c.900 G>A   | p.L300L  | SILENT   |
| MA4_22R | Chr4  | 57798031  | C | G | 0.055214724 | REST       | ENST00000309042_r73 | c.3007 C>G  | p.Q1003E | MISSENSE |
| MA4_22R | Chr4  | 70078419  | C | A | 0.127272727 | UGT2B11    | ENST00000446444_r73 | c.742 G>T   | p.E248*  | NONSENSE |
| MA4_22R | Chr4  | 70723328  | T | G | 0.307692308 | SULT1E1    | ENST00000226444_r73 | c.35 A>C    | p.E12A   | MISSENSE |
| MA4_22R | Chr4  | 71701903  | A | T | 0.245901639 | GRSF1      | ENST00000254799_r73 | c.486 T>A   | p.T162T  | SILENT   |
| MA4_22R | Chr4  | 85656218  | G | T | 0.102040816 | WDFY3      | ENST00000295888_r73 | c.6971 C>A  | p.T2324K | MISSENSE |
| MA4_22R | Chr4  | 88987031  | G | A | 0.058139535 | PKD2       | ENST00000237596_r73 | c.2358 G>A  | p.R786R  | SILENT   |
| MA4_22R | Chr4  | 90856145  | A | T | 0.058536585 | MMRN1      | ENST00000394980_r73 | c.1314 A>T  | p.A438A  | SILENT   |
| MA4_22R | Chr4  | 100532313 | C | T | 0.321428571 | MTTP       | ENST00000265517_r73 | c.1783 C>T  | p.R595*  | NONSENSE |
| MA4_22R | Chr4  | 110670734 | A | G | 0.072072072 | CFI        | ENST00000394634_r73 | c.965 T>C   | p.L322S  | MISSENSE |
| MA4_22R | Chr4  | 113541204 | C | T | 0.061728395 | C4orf21    | ENST00000505019_r73 | c.305 G>A   | p.G102D  | MISSENSE |
| MA4_22R | Chr4  | 123280818 | T | A | 0.065217391 | KIAA1109   | ENST00000264501_r73 | c.14742 T>A | p.Y4914* | NONSENSE |
| MA4_22R | Chr4  | 124323268 | G | A | 0.111111111 | SPRY1      | ENST00000339241_r73 | c.522 G>A   | p.L174L  | SILENT   |
| MA4_22R | Chr4  | 129812279 | G | A | 0.060606061 | SCLT1      | ENST00000281142_r73 | c.1843 C>T  | p.R615*  | NONSENSE |
| MA4_22R | Chr4  | 148595015 | T | A | 0.050761421 | PRMT10     | ENST00000322396_r73 | c.349 A>T   | p.R117W  | MISSENSE |
| MA4_22R | Chr4  | 148653548 | C | T | 0.060301508 | ARHGAP10   | ENST00000336498_r73 | c.96 C>T    | p.T32T   | SILENT   |
| MA4_22R | Chr4  | 153247366 | C | T | 0.351851852 | FBXW7      | ENST00000281708_r73 | c.1436 G>A  | p.R479Q  | MISSENSE |
| MA4_22R | Chr4  | 186560180 | G | A | 0.076923077 | SORBS2     | ENST00000437304_r73 | c.1231 C>T  | p.P411S  | MISSENSE |
| MA4_22R | Chr10 | 50151445  | A | T | 0.070422535 | WDFY4      | ENST00000325239_r73 | c.7700 A>T  | p.Y2567F | MISSENSE |
| MA4_22R | Chr10 | 65379496  | C | G | 0.057777778 | REEP3      | ENST00000373758_r73 | c.647 C>G   | p.T216R  | MISSENSE |
| MA4_22R | Chr10 | 69961725  | C | G | 0.053097345 | MYPN       | ENST00000358913_r73 | c.3633 C>G  | p.T1211T | SILENT   |
| MA4_22R | Chr10 | 70243256  | C | T | 0.051282051 | SLC25A16   | ENST00000265870_r73 | c.932 G>A   | p.C311Y  | MISSENSE |
| MA4_22R | Chr10 | 74953307  | C | G | 0.344262295 | FAM149B1   | ENST00000242505_r73 | c.498 C>G   | p.S166S  | SILENT   |
| MA4_22R | Chr10 | 75283499  | A | T | 0.054945055 | USP54      | ENST00000339859_r73 | c.2204 T>A  | p.I735K  | MISSENSE |
| MA4_22R | Chr10 | 88703086  | G | A | 0.059782609 | MMRN2      | ENST00000372027_r73 | c.1455 C>T  | p.L485L  | SILENT   |
| MA4_22R | Chr10 | 96341107  | G | T | 0.11627907  | HELLS      | ENST00000348459_r73 | c.1057 G>T  | p.V353L  | MISSENSE |
| MA4_22R | Chr10 | 101590588 | G | A | 0.06741573  | ABCC2      | ENST00000370449_r73 | c.2863 G>A  | p.E955K  | MISSENSE |
| MA4_22R | Chr10 | 102763678 | C | T | 0.179775281 | LZTS2      | ENST00000370223_r73 | c.823 C>T   | p.R275W  | MISSENSE |
| MA4_22R | Chr10 | 105798871 | C | T | 0.25        | COL17A1    | ENST00000353479_r73 | c.2905 G>A  | p.G969S  | MISSENSE |
| MA4_22R | Chr10 | 111881968 | G | A | 0.052287582 | ADD3       | ENST00000360162_r73 | c.1061 G>A  | p.G354E  | MISSENSE |

Sheet1

|         |       |           |   |   |             |          |                     |              |          |                  |
|---------|-------|-----------|---|---|-------------|----------|---------------------|--------------|----------|------------------|
| MA4_22R | Chr10 | 124895854 | T | C | 0.05982906  | HMX3     | ENST00000357878_r73 | c.288 T>C    | p.F96F   | SILENT           |
| MA4_22R | Chr10 | 129913861 | C | T | 0.194331984 | MKI67    | ENST00000368654_r73 | c.811 G>A    | p.A271T  | MISSENSE         |
| MA4_22R | Chr10 | 131958338 | G | T | 0.108695652 | GLRX3    | ENST00000331244_r73 | Exon 3 5 G>T | -        | ESSENTIAL_SPLICE |
| MA4_22R | Chr19 | 1005543   | C | T | 0.415384615 | GRIN3B   | ENST00000234389_r73 | c.2043 C>T   | p.H681H  | SILENT           |
| MA4_22R | Chr19 | 2114166   | C | T | 0.053811659 | AP3D1    | ENST00000355272_r73 | c.2559 G>A   | p.E853E  | SILENT           |
| MA4_22R | Chr19 | 2291521   | C | T | 0.096774194 | LINGO3   | ENST00000585527_r73 | c.255 G>A    | p.L85L   | SILENT           |
| MA4_22R | Chr19 | 3542962   | C | T | 0.063829787 | MFSD12   | ENST00000398558_r73 | c.1434 G>A   | p.W478*  | NONSENSE         |
| MA4_22R | Chr19 | 5211657   | G | C | 0.05        | PTPRS    | ENST00000587303_r73 | c.5178 C>G   | p.P1726P | SILENT           |
| MA4_22R | Chr19 | 11976988  | C | G | 0.056603774 | ZNF439   | ENST00000304030_r73 | c.17 C>G     | p.P6R    | MISSENSE         |
| MA4_22R | Chr19 | 14066781  | G | A | 0.25        | DCAF15   | ENST00000254337_r73 | c.424 G>A    | p.V142I  | MISSENSE         |
| MA4_22R | Chr19 | 16957871  | G | A | 0.073684211 | SIN3B    | ENST00000379803_r73 | c.673 G>A    | p.E225K  | MISSENSE         |
| MA4_22R | Chr19 | 19751255  | C | T | 0.068376068 | GMIP     | ENST00000203556_r73 | c.364 G>A    | p.E122K  | MISSENSE         |
| MA4_22R | Chr19 | 33600873  | G | A | 0.085714286 | GPATCH1  | ENST00000170564_r73 | c.1536 G>A   | p.K512K  | SILENT           |
| MA4_22R | Chr19 | 35610320  | G | T | 0.139534884 | FXYD3    | ENST00000604404_r73 | c.40 G>T     | p.G14C   | MISSENSE         |
| MA4_22R | Chr19 | 37240210  | G | C | 0.059405941 | ZNF850   | ENST00000591344_r73 | c.1732 C>G   | p.Q578E  | MISSENSE         |
| MA4_22R | Chr19 | 39364604  | G | A | 0.102941177 | RINL     | ENST00000591812_r73 | c.235 C>T    | p.P79S   | MISSENSE         |
| MA4_22R | Chr19 | 40842060  | T | A | 0.058823529 | C19orf47 | ENST00000582783_r73 | c.290 A>T    | p.D97V   | MISSENSE         |
| MA4_22R | Chr19 | 41779891  | C | T | 0.432432432 | HNRNPUL1 | ENST00000595018_r73 | c.277 C>T    | p.R93C   | MISSENSE         |
| MA4_22R | Chr19 | 46417691  | C | T | 0.087301587 | NANOS2   | ENST00000341294_r73 | c.261 G>A    | p.V87V   | SILENT           |
| MA4_22R | Chr19 | 48801484  | C | A | 0.110091743 | CCDC114  | ENST00000315396_r73 | c.1243 G>T   | p.E415*  | NONSENSE         |
| MA4_22R | Chr19 | 55994493  | G | A | 0.085714286 | ZNF628   | ENST00000598519_r73 | c.1933 G>A   | p.A645T  | MISSENSE         |
| MA4_22R | Chr19 | 56243463  | C | T | 0.081395349 | NLRP9    | ENST00000332836_r73 | c.1734 G>A   | p.L578L  | SILENT           |
| MA4_22R | Chr19 | 58989159  | G | T | 0.101265823 | ZNF446   | ENST00000594369_r73 | c.498 G>T    | p.V166V  | SILENT           |
| MA4_22R | Chr5  | 1280309   | G | A | 0.30075188  | TERT     | ENST00000310581_r73 | c.1914 C>T   | p.Y638Y  | SILENT           |
| MA4_22R | Chr5  | 31318018  | C | T | 0.19        | CDH6     | ENST00000265071_r73 | c.1869 C>T   | p.I623I  | SILENT           |
| MA4_22R | Chr5  | 41911179  | G | A | 0.097560976 | C5orf51  | ENST00000381647_r73 | c.384 G>A    | p.L128L  | SILENT           |
| MA4_22R | Chr5  | 53815413  | G | A | 0.051136364 | SNX18    | ENST00000343017_r73 | c.1631 G>A   | p.W544*  | NONSENSE         |
| MA4_22R | Chr5  | 64492932  | G | A | 0.052173913 | ADAMTS6  | ENST00000381055_r73 | c.2622 C>T   | p.S874S  | SILENT           |
| MA4_22R | Chr5  | 74026094  | G | A | 0.2125      | GFM2     | ENST00000296805_r73 | c.1717 C>T   | p.R573C  | MISSENSE         |
| MA4_22R | Chr5  | 75914346  | G | A | 0.05        | F2RL2    | ENST00000296641_r73 | c.186 C>T    | p.A62A   | SILENT           |
| MA4_22R | Chr5  | 96341909  | A | T | 0.096774194 | LNPEP    | ENST00000231368_r73 | c.1918 A>T   | p.K640*  | NONSENSE         |
| MA4_22R | Chr5  | 118483009 | C | G | 0.052631579 | DMXL1    | ENST00000311085_r73 | c.2755 C>G   | p.P919A  | MISSENSE         |
| MA4_22R | Chr5  | 124036904 | G | C | 0.052083333 | ZNF608   | ENST00000306315_r73 | c.965 C>G    | p.P322R  | MISSENSE         |
| MA4_22R | Chr5  | 137727662 | G | A | 0.052631579 | KDM3B    | ENST00000314358_r73 | c.2341 G>A   | p.A781T  | MISSENSE         |
| MA4_22R | Chr5  | 140176813 | G | A | 0.128205128 | PCDHA2   | ENST00000526136_r73 | c.2264 G>A   | p.R755Q  | MISSENSE         |
| MA4_22R | Chr5  | 140215289 | G | A | 0.339622642 | PCDHA7   | ENST00000525929_r73 | c.1321 G>A   | p.V441M  | MISSENSE         |
| MA4_22R | Chr5  | 140750726 | G | A | 0.051546392 | PCDHGB3  | ENST00000576222_r73 | c.765 G>A    | p.L255L  | SILENT           |



Sheet1

|         |      |           |   |   |             |          |                     |             |          |          |
|---------|------|-----------|---|---|-------------|----------|---------------------|-------------|----------|----------|
| MA4_22R | Chr5 | 148407426 | C | T | 0.090909091 | SH3TC2   | ENST00000515425_r73 | c.1869 G>A  | p.G623G  | SILENT   |
| MA4_22R | Chr5 | 149417020 | G | C | 0.285714286 | HMGXB3   | ENST00000502717_r73 | c.2343 G>C  | p.V781V  | SILENT   |
| MA4_22R | Chr5 | 149495412 | G | T | 0.12962963  | PDGFRB   | ENST00000261799_r73 | c.3235 C>A  | p.Q1079K | MISSENSE |
| MA4_22R | Chr5 | 157053387 | A | T | 0.067961165 | SOX30    | ENST00000265007_r73 | c.2223 T>A  | p.S741R  | MISSENSE |
| MA4_22R | Chr5 | 170827164 | G | A | 0.075268817 | NPM1     | ENST00000517671_r73 | c.532 G>A   | p.D178N  | MISSENSE |
| MA4_22R | Chr5 | 176823783 | G | A | 0.051546392 | SLC34A1  | ENST00000324417_r73 | c.1224 G>A  | p.V408V  | SILENT   |
| MA4_22R | Chr5 | 176827505 | G | A | 0.063829787 | PFN3     | ENST00000358571_r73 | c.73 C>T    | p.H25Y   | MISSENSE |
| MA4_22R | Chr5 | 180552290 | C | T | 0.050505051 | OR2V1    | ENST00000329365_r73 | c.15 G>A    | p.V5V    | SILENT   |
| MA4_22R | Chr7 | 44714066  | G | A | 0.114754098 | OGDH     | ENST00000443864_r73 | c.845 G>A   | p.G282D  | MISSENSE |
| MA4_22R | Chr7 | 48314009  | C | T | 0.063157895 | ABCA13   | ENST00000435803_r73 | c.4746 C>T  | p.A1582A | SILENT   |
| MA4_22R | Chr7 | 56119600  | T | A | 0.078651685 | CCT6A    | ENST00000275603_r73 | c.59 T>A    | p.L20Q   | MISSENSE |
| MA4_22R | Chr7 | 72718795  | G | A | 0.113636364 | NSUN5    | ENST00000428206_r73 | c.590 C>T   | p.A197V  | MISSENSE |
| MA4_22R | Chr7 | 75051365  | G | A | 0.161290323 | POM121C  | ENST00000453279_r73 | c.2170 C>T  | p.P724S  | MISSENSE |
| MA4_22R | Chr7 | 76952988  | C | T | 0.052238806 | GSAP     | ENST00000257626_r73 | c.1899 G>A  | p.M633I  | MISSENSE |
| MA4_22R | Chr7 | 81964550  | T | C | 0.095238095 | CACNA2D1 | ENST00000356860_r73 | c.195 A>G   | p.Q65Q   | SILENT   |
| MA4_22R | Chr7 | 83634702  | C | T | 0.115853659 | SEMA3A   | ENST00000265362_r73 | c.1313 G>A  | p.R438Q  | MISSENSE |
| MA4_22R | Chr7 | 86823157  | G | A | 0.05        | DMTF1    | ENST00000331242_r73 | c.1767 G>A  | p.L589L  | SILENT   |
| MA4_22R | Chr7 | 87195400  | C | T | 0.05        | ABCB1    | ENST00000265724_r73 | c.688 G>A   | p.A230T  | MISSENSE |
| MA4_22R | Chr7 | 89856763  | C | G | 0.25        | STEAP2   | ENST00000287908_r73 | c.971 C>G   | p.P324R  | MISSENSE |
| MA4_22R | Chr7 | 93055777  | G | T | 0.10619469  | CALCR    | ENST00000394441_r73 | c.1316 C>A  | p.P439Q  | MISSENSE |
| MA4_22R | Chr7 | 97847329  | G | T | 0.107142857 | TECPR1   | ENST00000447648_r73 | c.3183 C>A  | p.I1061I | SILENT   |
| MA4_22R | Chr7 | 98957229  | C | T | 0.077586207 | ARPC1A   | ENST00000262942_r73 | c.851 C>T   | p.S284F  | MISSENSE |
| MA4_22R | Chr7 | 99711864  | T | A | 0.074324324 | TAF6     | ENST00000437822_r73 | c.80 A>T    | p.H27L   | MISSENSE |
| MA4_22R | Chr7 | 121651144 | C | T | 0.06918239  | PTPRZ1   | ENST00000393386_r73 | c.2044 C>T  | p.R682C  | MISSENSE |
| MA4_22R | Chr7 | 124503458 | C | T | 0.052083333 | POT1     | ENST00000357628_r73 | c.492 G>A   | p.L164L  | SILENT   |
| MA4_22R | Chr7 | 128415200 | T | A | 0.1         | OPN1SW   | ENST00000249389_r73 | c.361 A>T   | p.T121S  | MISSENSE |
| MA4_22R | Chr7 | 132973690 | G | T | 0.108695652 | EXOC4    | ENST00000393161_r73 | c.291 G>T   | p.L97L   | SILENT   |
| MA4_22R | Chr7 | 144095425 | G | T | 0.103092784 | NOBOX    | ENST00000483238_r73 | c.1628 C>A  | p.P543Q  | MISSENSE |
| MA4_22R | Chr7 | 150779363 | C | T | 0.053571429 | TMUB1    | ENST00000297533_r73 | c.288 G>A   | p.P96P   | SILENT   |
| MA4_22R | Chr2 | 9580763   | C | A | 0.111111111 | CPSF3    | ENST00000238112_r73 | c.904 C>A   | p.P302T  | MISSENSE |
| MA4_22R | Chr2 | 15644291  | T | A | 0.059288538 | NBAS     | ENST00000281513_r73 | c.932 A>T   | p.Y311F  | MISSENSE |
| MA4_22R | Chr2 | 23785338  | C | T | 0.5         | KLHL29   | ENST00000486442_r73 | c.272 C>T   | p.A91V   | MISSENSE |
| MA4_22R | Chr2 | 31570446  | G | A | 0.538461539 | XDH      | ENST00000379416_r73 | c.3218 C>T  | p.P1073L | MISSENSE |
| MA4_22R | Chr2 | 32828115  | G | T | 0.13559322  | BIRC6    | ENST00000421745_r73 | c.14035 G>T | p.E4679* | NONSENSE |
| MA4_22R | Chr2 | 43924331  | C | T | 0.055555556 | PLEKHH2  | ENST00000282406_r73 | c.524 C>T   | p.S175F  | MISSENSE |
| MA4_22R | Chr2 | 48602394  | C | T | 0.057471264 | FOXN2    | ENST00000340553_r73 | c.1108 C>T  | p.Q370*  | NONSENSE |
| MA4_22R | Chr2 | 49295382  | G | A | 0.095238095 | FSHR     | ENST00000406846_r73 | c.200 C>T   | p.S67L   | MISSENSE |

Sheet1

|         |      |           |   |   |             |              |                     |              |           |                  |
|---------|------|-----------|---|---|-------------|--------------|---------------------|--------------|-----------|------------------|
| MA4_22R | Chr2 | 54148234  | C | T | 0.678571429 | PSME4        | ENST00000404125_r73 | c.2054 G>A   | p.R685Q   | MISSENSE         |
| MA4_22R | Chr2 | 55096480  | G | T | 0.115384615 | EML6         | ENST00000356458_r73 | c.2214 G>T   | p.V738V   | SILENT           |
| MA4_22R | Chr2 | 55566693  | G | C | 0.10619469  | CCDC88A      | ENST00000336838_r73 | c.1425 C>G   | p.T475T   | SILENT           |
| MA4_22R | Chr2 | 56145080  | G | C | 0.054545455 | EFEMP1       | ENST00000394555_r73 | c.237 C>G    | p.V79V    | SILENT           |
| MA4_22R | Chr2 | 61541776  | C | T | 0.054794521 | USP34        | ENST00000398571_r73 | c.3486 G>A   | p.M1162I  | MISSENSE         |
| MA4_22R | Chr2 | 70486562  | G | T | 0.106382979 | PCYOX1       | ENST00000433351_r73 | c.183 G>T    | p.V61V    | SILENT           |
| MA4_22R | Chr2 | 71631089  | A | T | 0.05511811  | ZNF638       | ENST00000264447_r73 | c.2919 A>T   | p.S973S   | SILENT           |
| MA4_22R | Chr2 | 73989867  | G | T | 0.118644068 | DUSP11       | ENST00000272444_r73 | c.1055 C>A   | p.A352E   | MISSENSE         |
| MA4_22R | Chr2 | 74709640  | G | A | 0.068181818 | CCDC142      | ENST00000290418_r73 | c.325 C>T    | p.R109*   | NONSENSE         |
| MA4_22R | Chr2 | 74902895  | C | T | 0.059405941 | SEMA4F       | ENST00000357877_r73 | c.1502 C>T   | p.S501F   | MISSENSE         |
| MA4_22R | Chr2 | 84774741  | G | A | 0.056962025 | DNAH6        | ENST00000237449_r73 | Exon 6 5 G>A | -         | ESSENTIAL_SPLICE |
| MA4_22R | Chr2 | 86847448  | C | T | 0.049586777 | CHMP3        | ENST00000439940_r73 | Exon 3 5 G>A | -         | ESSENTIAL_SPLICE |
| MA4_22R | Chr2 | 86847448  | C | T | 0.049586777 | RNF103-CHMP3 | ENST00000604011_r73 | Exon 3 5 G>A | -         | ESSENTIAL_SPLICE |
| MA4_22R | Chr2 | 86847448  | C | T | 0.049586777 | RNF103       | ENST00000237455_r73 | Exon 2 5 G>A | -         | ESSENTIAL_SPLICE |
| MA4_22R | Chr2 | 86847448  | C | T | 0.049586777 | CHMP3        | ENST00000439940_r73 | Exon 3 5 G>A | -         | ESSENTIAL_SPLICE |
| MA4_22R | Chr2 | 87017571  | C | T | 0.265151515 | CD8A         | ENST00000352580_r73 | c.283 G>A    | p.G95R    | MISSENSE         |
| MA4_22R | Chr2 | 88387471  | C | T | 0.386363636 | SMYD1        | ENST00000419482_r73 | c.405 C>T    | p.H135H   | SILENT           |
| MA4_22R | Chr2 | 102793049 | C | T | 0.248275862 | IL1R1        | ENST00000410023_r73 | c.1540 C>T   | p.R514C   | MISSENSE         |
| MA4_22R | Chr2 | 105473338 | G | A | 0.294797688 | POU3F3       | ENST00000361360_r73 | c.1370 G>A   | p.R457Q   | MISSENSE         |
| MA4_22R | Chr2 | 128339485 | G | A | 0.27027027  | MYO7B        | ENST00000409816_r73 | c.1100 G>A   | p.R367Q   | MISSENSE         |
| MA4_22R | Chr2 | 130910208 | G | T | 0.12195122  | SMPD4        | ENST00000351288_r73 | c.2434 C>A   | p.L812M   | MISSENSE         |
| MA4_22R | Chr2 | 133618104 | G | A | 0.050632911 | NCKAP5       | ENST00000409261_r73 | c.768 C>T    | p.F256F   | SILENT           |
| MA4_22R | Chr2 | 135308203 | C | T | 0.317460318 | TMEM163      | ENST00000281924_r73 | c.396 G>A    | p.S132S   | SILENT           |
| MA4_22R | Chr2 | 160801458 | G | A | 0.079096045 | PLA2R1       | ENST00000283243_r73 | c.4103 C>T   | p.P1368L  | MISSENSE         |
| MA4_22R | Chr2 | 162280208 | G | A | 0.34        | TBR1         | ENST00000389554_r73 | c.1519 G>A   | p.A507T   | MISSENSE         |
| MA4_22R | Chr2 | 167108340 | C | T | 0.061728395 | SCN9A        | ENST00000409672_r73 | c.3374 G>A   | p.G1125E  | MISSENSE         |
| MA4_22R | Chr2 | 171055777 | C | T | 0.061068702 | MYO3B        | ENST00000409044_r73 | c.62 C>T     | p.P21L    | MISSENSE         |
| MA4_22R | Chr2 | 179429213 | G | A | 0.314285714 | TTN          | ENST00000342992_r73 | c.73942 C>T  | p.R24648C | MISSENSE         |
| MA4_22R | Chr2 | 179480116 | G | A | 0.067039106 | TTN          | ENST00000342992_r73 | c.40852 C>T  | p.R13618C | MISSENSE         |
| MA4_22R | Chr2 | 190436555 | T | G | 0.055555556 | SLC40A1      | ENST00000261024_r73 | c.400 A>C    | p.I134L   | MISSENSE         |
| MA4_22R | Chr2 | 192255067 | C | T | 0.05952381  | MYO1B        | ENST00000339514_r73 | c.1831 C>T   | p.L611L   | SILENT           |
| MA4_22R | Chr2 | 198570371 | C | T | 0.056074766 | MARS2        | ENST00000282276_r73 | c.242 C>T    | p.P81L    | MISSENSE         |
| MA4_22R | Chr2 | 202248908 | C | T | 0.256281407 | TRAK2        | ENST00000332624_r73 | c.1995 G>A   | p.S665S   | SILENT           |
| MA4_22R | Chr2 | 204009852 | G | A | 0.06993007  | NBEAL1       | ENST00000449802_r73 | c.5186 G>A   | p.R1729Q  | MISSENSE         |
| MA4_22R | Chr2 | 206588620 | G | A | 0.063063063 | NRP2         | ENST00000360409_r73 | c.776 G>A    | p.G259D   | MISSENSE         |
| MA4_22R | Chr2 | 210561752 | C | T | 0.103448276 | MAP2         | ENST00000360351_r73 | c.4499 C>T   | p.S1500F  | MISSENSE         |
| MA4_22R | Chr2 | 215976355 | G | T | 0.108695652 | ABCA12       | ENST00000272895_r73 | c.128 C>A    | p.T43N    | MISSENSE         |

Sheet1

|         |       |           |   |   |             |          |                     |                |          |                  |
|---------|-------|-----------|---|---|-------------|----------|---------------------|----------------|----------|------------------|
| MA4_22R | Chr2  | 219487531 | G | A | 0.057692308 | PLCD4    | ENST00000450993_r73 | c.702 G>A      | p.E234E  | SILENT           |
| MA4_22R | Chr2  | 220112400 | G | A | 0.284671533 | STK16    | ENST00000409638_r73 | c.578 G>A      | p.R193Q  | MISSENSE         |
| MA4_22R | Chr2  | 220478944 | C | A | 0.157894737 | STK111P  | ENST00000295641_r73 | c.2811 C>A     | p.V937V  | SILENT           |
| MA4_22R | Chr2  | 223478577 | A | T | 0.081081081 | FARSB    | ENST00000281828_r73 | c.1415 T>A     | p.L472Q  | MISSENSE         |
| MA4_22R | Chr17 | 3030327   | C | G | 0.112359551 | OR1G1    | ENST00000328890_r73 | c.519 G>C      | p.E173D  | MISSENSE         |
| MA4_22R | Chr17 | 5358516   | C | T | 0.076271186 | DHX33    | ENST00000225296_r73 | c.1111 G>A     | p.D371N  | MISSENSE         |
| MA4_22R | Chr17 | 10317560  | C | T | 0.054054054 | MYH8     | ENST00000403437_r73 | c.957 G>A      | p.G319G  | SILENT           |
| MA4_22R | Chr17 | 10451131  | G | A | 0.051851852 | MYH2     | ENST00000245503_r73 | c.107 C>T      | p.T36I   | MISSENSE         |
| MA4_22R | Chr17 | 19186759  | C | T | 0.05027933  | EPN2     | ENST00000314728_r73 | c.327 C>T      | p.F109F  | SILENT           |
| MA4_22R | Chr17 | 28384857  | T | A | 0.050314465 | EFCAB5   | ENST00000536908_r73 | c.2361 T>A     | p.F787L  | MISSENSE         |
| MA4_22R | Chr17 | 31355390  | C | T | 0.342857143 | ASIC2    | ENST00000225823_r73 | c.1008 G>A     | p.P336P  | SILENT           |
| MA4_22R | Chr17 | 34867273  | G | A | 0.101449275 | MYO19    | ENST00000431794_r73 | c.916 C>T      | p.L306F  | MISSENSE         |
| MA4_22R | Chr17 | 35880734  | C | G | 0.071428571 | SYNRG    | ENST00000339208_r73 | c.3684 G>C     | p.L1228L | SILENT           |
| MA4_22R | Chr17 | 38711651  | C | T | 0.076923077 | CCR7     | ENST00000246657_r73 | c.480 G>A      | p.Q160Q  | SILENT           |
| MA4_22R | Chr17 | 38927490  | T | A | 0.071428571 | KRT26    | ENST00000335552_r73 | Exon 2 - 2 A>T | -        | ESSENTIAL_SPLICE |
| MA4_22R | Chr17 | 39975865  | G | A | 0.074534162 | FKBP10   | ENST00000321562_r73 | c.1001 G>A     | p.C334Y  | MISSENSE         |
| MA4_22R | Chr17 | 39992198  | C | T | 0.066037736 | NT5C3B   | ENST00000435506_r73 | c.24 G>A       | p.L8L    | SILENT           |
| MA4_22R | Chr2  | 239353004 | C | T | 0.068181818 | ASB1     | ENST00000264607_r73 | c.516 C>T      | p.V172V  | SILENT           |
| MA4_22R | Chr2  | 241817491 | G | T | 0.103092784 | AGXT     | ENST00000307503_r73 | c.995 G>T      | p.W332L  | MISSENSE         |
| MA4_22R | Chr17 | 41598785  | G | T | 0.150943396 | DHX8     | ENST00000262415_r73 | c.3115 G>T     | p.E1039* | NONSENSE         |
| MA4_22R | Chr17 | 44109023  | G | A | 0.115942029 | KANSL1   | ENST00000574590_r73 | c.3137 C>T     | p.P1046L | MISSENSE         |
| MA4_22R | Chr17 | 46628451  | T | C | 0.666666667 | HOXB3    | ENST00000470495_r73 | c.541 A>G      | p.S181G  | MISSENSE         |
| MA4_22R | Chr17 | 48245917  | G | A | 0.074766355 | SGCA     | ENST00000344627_r73 | c.568 G>A      | p.E190K  | MISSENSE         |
| MA4_22R | Chr17 | 57644084  | C | A | 0.14893617  | DHX40    | ENST00000251241_r73 | c.209 C>A      | p.S70*   | NONSENSE         |
| MA4_22R | Chr17 | 58286188  | G | A | 0.064220184 | USP32    | ENST00000300896_r73 | c.2600 C>T     | p.A867V  | MISSENSE         |
| MA4_22R | Chr17 | 63537574  | G | A | 0.12244898  | AXIN2    | ENST00000307078_r73 | c.1058 C>T     | p.P353L  | MISSENSE         |
| MA4_22R | Chr17 | 73488684  | C | T | 0.059602649 | KIAA0195 | ENST00000314256_r73 | c.1726 C>T     | p.Q576*  | NONSENSE         |
| MA4_22R | Chr17 | 73520492  | G | A | 0.071428571 | TSEN54   | ENST00000333213_r73 | c.1580 G>A     | p.*527*  | SILENT           |
| MA4_22R | Chr17 | 74283314  | C | T | 0.073770492 | QRICH2   | ENST00000262765_r73 | c.3472 G>A     | p.E1158K | MISSENSE         |
| MA4_22R | Chr17 | 74865120  | C | T | 0.0625      | MGAT5B   | ENST00000301618_r73 | c.9 C>T        | p.T3T    | SILENT           |
| MA4_22R | Chr22 | 17669257  | C | T | 0.058252427 | CECR1    | ENST00000399839_r73 | c.1053 G>A     | p.L351L  | SILENT           |
| MA4_22R | Chr22 | 21119138  | T | A | 0.063063063 | PI4KA    | ENST00000255882_r73 | c.2675 A>T     | p.Y892F  | MISSENSE         |
| MA4_22R | Chr22 | 30925111  | C | T | 0.058823529 | SEC14L6  | ENST00000402034_r73 | c.627 G>A      | p.M209I  | MISSENSE         |
| MA4_22R | Chr1  | 1007257   | G | A | 0.271428571 | RNF223   | ENST00000453464_r73 | c.690 C>T      | p.P230P  | SILENT           |
| MA4_22R | Chr1  | 1168143   | G | A | 0.483516484 | B3GALT6  | ENST00000379198_r73 | c.485 G>A      | p.R162Q  | MISSENSE         |
| MA4_22R | Chr1  | 1960665   | C | A | 0.101010101 | GABRD    | ENST00000378585_r73 | c.807 C>A      | p.F269L  | MISSENSE         |
| MA4_22R | Chr1  | 3683892   | G | A | 0.068181818 | CCDC27   | ENST00000294600_r73 | c.1626 G>A     | p.L542L  | SILENT           |

Sheet1

|         |       |           |     |   |             |            |                     |               |             |                  |
|---------|-------|-----------|-----|---|-------------|------------|---------------------|---------------|-------------|------------------|
| MA4_22R | Chr1  | 4772148   | G   | A | 0.561403509 | AJAP1      | ENST00000378190_r73 | c.218 G>A     | p.R73Q      | MISSENSE         |
| MA4_22R | Chr1  | 6531080   | G   | A | 0.403508772 | PLEKHG5    | ENST00000377748_r73 | c.1593 C>T    | p.R531R     | SILENT           |
| MA4_22R | Chr1  | 11589887  | C   | T | 0.195121951 | PTCHD2     | ENST00000294484_r73 | c.2973 C>T    | p.C991C     | SILENT           |
| MA4_22R | Chr1  | 17396656  | T   | A | 0.064102564 | PADI2      | ENST00000375486_r73 | c.1691 A>T    | p.Q564L     | MISSENSE         |
| MA4_22R | Chr1  | 24408594  | C   | T | 0.265306122 | MYOM3      | ENST00000374434_r73 | c.2177 G>A    | p.R726H     | MISSENSE         |
| MA4_22R | Chr22 | 40042742  | C   | T | 0.077419355 | CACNA1I    | ENST00000404898_r73 | c.1318 C>T    | p.Q440*     | NONSENSE         |
| MA4_22R | Chr22 | 50714157  | C   | T | 0.089552239 | PLXNB2     | ENST00000449103_r73 | c.5493 G>A    | p.L1831L    | SILENT           |
| MA4_22R | Chr22 | 50714157  | C   | T | 0.089552239 | AL022328.1 | ENST00000595015_r73 | c.55 C>T      | p.Q19*      | NONSENSE         |
| MA4_22R | Chr1  | 156509684 | G   | A | 0.051094891 | IQGAP3     | ENST00000361170_r73 | c.2838 C>T    | p.S946S     | SILENT           |
| MA4_22R | Chr1  | 158326365 | C   | T | 0.113402062 | CD1E       | ENST00000368167_r73 | c.982 C>T     | p.R328W     | MISSENSE         |
| MA4_22R | Chr1  | 158450438 | G   | A | 0.333333333 | OR10R2     | ENST00000368152_r73 | c.771 G>A     | p.A257A     | SILENT           |
| MA4_22R | Chr1  | 161165409 | C   | A | 0.108910891 | ADAMTS4    | ENST00000367996_r73 | c.1107 G>T    | p.M369I     | MISSENSE         |
| MA4_22R | Chr1  | 162567643 | G   | A | 0.058823529 | UAP1       | ENST00000367926_r73 | c.1420 G>A    | p.G474R     | MISSENSE         |
| MA4_22R | Chr1  | 169292461 | C   | T | 0.096491228 | NME7       | ENST00000472647_r73 | c.64 G>A      | p.E22K      | MISSENSE         |
| MA4_22R | Chr1  | 169493034 | C   | T | 0.063380282 | F5         | ENST00000367797_r73 | Exon 20 5 G>A | -           | ESSENTIAL_SPLICE |
| MA4_22R | Chr1  | 172543102 | C   | A | 0.111111111 | SUCO       | ENST00000263688_r73 | c.1121 C>A    | p.S374Y     | MISSENSE         |
| MA4_22R | Chr1  | 177245460 | C   | T | 0.053763441 | FAM5B      | ENST00000361539_r73 | c.902 C>T     | p.P301L     | MISSENSE         |
| MA4_22R | Chr1  | 179562979 | A   | G | 0.389380531 | TDRD5      | ENST00000367614_r73 | c.617 A>G     | p.E206G     | MISSENSE         |
| MA4_22R | Chr1  | 180885344 | G   | A | 0.070175439 | KIAA1614   | ENST00000367588_r73 | c.105 G>A     | p.V35V      | SILENT           |
| MA4_22R | Chr1  | 184764692 | C   | T | 0.061643836 | FAM129A    | ENST00000367511_r73 | c.2206 G>A    | p.G736R     | MISSENSE         |
| MA4_22R | Chr1  | 190234153 | G   | A | 0.420634921 | FAM5C      | ENST00000367462_r73 | c.460 C>T     | p.R154W     | MISSENSE         |
| MA4_22R | Chr1  | 205033551 | G   | A | 0.064516129 | CNTN2      | ENST00000331830_r73 | c.1342 G>A    | p.A448T     | MISSENSE         |
| MA4_22R | Chr1  | 223803625 | C   | T | 0.058823529 | CAPN8      | ENST00000366872_r73 | c.1342 G>A    | p.G448R     | MISSENSE         |
| MA4_22R | Chr1  | 226127230 | G   | T | 0.135135135 | LEFTY2     | ENST00000366820_r73 | c.568 C>A     | p.L190M     | MISSENSE         |
| MA4_22R | Chr1  | 228506816 | C   | T | 0.2125      | OBSCN      | ENST00000284548_r73 | c.14363 C>T   | p.T4788M    | MISSENSE         |
| MA4_22R | Chr1  | 232650601 | C   | G | 0.053691275 | SIPA1L2    | ENST00000366630_r73 | c.485 G>C     | p.S162T     | MISSENSE         |
| MA4_22R | Chr1  | 232943422 | A   | T | 0.05952381  | MAP10      | ENST00000418460_r73 | c.2653 A>T    | p.K885*     | NONSENSE         |
| MA4_22R | Chr1  | 235887462 | C   | T | 0.060240964 | LYST       | ENST00000389794_r73 | c.9181 G>A    | p.E3061K    | MISSENSE         |
| MA4_22R | Chr11 | 15199983  | GG  | - | 0.123076923 | INSC       | ENST00000379554_r73 | c.710 GG>-    | p.R237fs*10 | FRAMESHIFT       |
| MA4_22R | Chr7  | 26237308  | G   | - | 0.180124224 | HNRNPA2B1  | ENST00000354667_r73 | c.87 C>-      | p.S29fs*9   | FRAMESHIFT       |
| MA4_22R | Chr7  | 100001318 | G   | - | 0.185185185 | ZCWPW1     | ENST00000398027_r73 | c.1409 C>-    | p.T470fs*41 | FRAMESHIFT       |
| MA4_22R | Chr2  | 43924491  | G   | - | 0.113207547 | PLEKHH2    | ENST00000282406_r73 | c.684 G>-     | p.M228fs*16 | FRAMESHIFT       |
| MA4_22R | Chr2  | 73430157  | GC  | - | 0.133333333 | NOTO       | ENST00000398468_r73 | c.363 GC>-    | p.L121fs*32 | FRAMESHIFT       |
| MA4_22R | Chr2  | 71160044  | T   | - | 0.125       | VAX2       | ENST00000234392_r73 | c.583 T>-     | p.P195fs*9  | FRAMESHIFT       |
| MA4_22R | Chr2  | 113588969 | TC  | - | 0.107142857 | IL1B       | ENST00000263341_r73 | c.496 GA>-    | p.E166fs*3  | FRAMESHIFT       |
| MA4_22R | Chr2  | 201399723 | TTC | - | 0.148148148 | SGOL2      | ENST00000357799_r73 | c.138 TTC>-   | p.N46 NS>N  | MISSENSE         |
| MA4_22R | Chr2  | 220412717 | CC  | - | 0.142857143 | TMEM198    | ENST00000344458_r73 | c.656 CC>-    | p.A219fs*22 | FRAMESHIFT       |

Sheet1

|         |       |           |         |    |             |               |                     |                 |              |            |
|---------|-------|-----------|---------|----|-------------|---------------|---------------------|-----------------|--------------|------------|
| MA4_22R | Chr2  | 222291323 | AC      | -  | 0.101694915 | EPHA4         | ENST00000409938_r73 | c.2706 GT>-     | p.L902fs*7   | FRAMESHIFT |
| MA4_22R | Chr2  | 238662045 | G       | -  | 0.117647059 | LRRFIP1       | ENST00000308482_r73 | c.961 G>-       | p.D321fs*3   | FRAMESHIFT |
| MA4_22R | Chr1  | 22970558  | GCT     | -  | 0.176470588 | C1QC          | ENST00000374640_r73 | c.42 GCT>-      | p.K14 KL>K   | MISSSENSE  |
| MA4_22R | Chr1  | 31899598  | C       | -  | 0.102040816 | SERINC2       | ENST00000373710_r73 | c.735 C>-       | p.G245fs*112 | FRAMESHIFT |
| MA4_22R | Chr1  | 150469354 | A       | -  | 0.133333333 | TARS2         | ENST00000369064_r73 | c.990 A>-       | p.R330fs*6   | FRAMESHIFT |
| MA4_22R | Chr16 | 22019647  | G       | -  | 0.230769231 | C16orf52      | ENST00000542527_r73 | c.25 G>-        | p.G9fs*71    | FRAMESHIFT |
| MA4_22R | Chr16 | 67680870  | GC      | -  | 0.117647059 | RLTPR         | ENST00000334583_r73 | c.605 GC>-      | p.G202fs*30  | FRAMESHIFT |
| MA4_22R | Chr16 | 68026446  | T       | -  | 0.142857143 | DPEP2         | ENST00000393847_r73 | c.357 A>-       | p.L119fs*51  | FRAMESHIFT |
| MA4_22R | Chr13 | 51929241  | T       | -  | 0.107526882 | SERPINE3      | ENST00000521255_r73 | c.962 T>-       | p.L321fs*9   | FRAMESHIFT |
| MA4_22R | Chr6  | 38743571  | G       | -  | 0.148148148 | DNAH8         | ENST00000449981_r73 | c.1806 G>-      | p.L602fs*6   | FRAMESHIFT |
| MA4_22R | ChrX  | 13792720  | TG      | -  | 0.107142857 | GPM6B         | ENST00000454189_r73 | c.683 CA>-      | p.T228fs*2   | FRAMESHIFT |
| MA4_22R | ChrX  | 47918404  | C       | -  | 0.125       | ZNF630        | ENST00000409324_r73 | c.1427 G>-      | p.G476fs*59  | FRAMESHIFT |
| MA4_22R | ChrX  | 50654097  | C       | -  | 0.153846154 | BMP15         | ENST00000252677_r73 | c.314 C>-       | p.A105fs*26  | FRAMESHIFT |
| MA4_22R | ChrX  | 53588762  | CC      | -  | 0.12        | HUWE1         | ENST00000342160_r73 | c.7461 GG>-     | p.R2487fs*3  | FRAMESHIFT |
| MA4_22R | ChrX  | 99941061  | T       | -  | 0.1         | SYTL4         | ENST00000372989_r73 | c.1375 A>-      | p.G459fs*45  | FRAMESHIFT |
| MA4_22R | ChrX  | 104728339 | C       | -  | 0.127659575 | IL1RAPL2      | ENST00000372582_r73 | c.732 C>-       | p.F244fs*10  | FRAMESHIFT |
| MA4_22R | ChrX  | 106229235 | T       | -  | 0.113207547 | MORC4         | ENST00000355610_r73 | c.504 A>-       | p.I168fs*11  | FRAMESHIFT |
| MA4_22R | ChrX  | 117695409 | TA      | -  | 0.121212121 | DOCK11        | ENST00000276202_r73 | c.622 TA>-      | p.Y208fs*1   | FRAMESHIFT |
| MA4_22R | ChrX  | 131211974 | CA      | -  | 0.126984127 | FRMD7         | ENST00000298542_r73 | c.2070 TG>-     | p.D690fs*11  | FRAMESHIFT |
| MA4_22R | Chr3  | 9989580   | CG      | -  | 0.153846154 | PRRT3         | ENST00000295984_r73 | c.1276 CG>-     | p.R426fs*225 | FRAMESHIFT |
| MA4_22R | Chr3  | 11372865  | GCCGGGA | -  | 0.100628931 | ATG7          | ENST00000446450_r73 | c.613 GCCGGGA>- | p.P205fs*420 | FRAMESHIFT |
| MA4_22R | Chr3  | 52538052  | GC      | -  | 0.106666667 | STAB1         | ENST00000321725_r73 | c.1031 GC>-     | p.C344fs*1   | FRAMESHIFT |
| MA4_22R | Chr9  | 38068159  | AG      | -  | 0.115384615 | RP11-613M10.9 | ENST00000540557_r73 | c.483 CT>-      | p.L161fs*84  | FRAMESHIFT |
| MA4_22R | Chr9  | 38068159  | AG      | -  | 0.115384615 | SHB           | ENST00000377707_r73 | c.483 CT>-      | p.L161fs*84  | FRAMESHIFT |
| MA4_22R | Chr9  | 140329682 | A       | -  | 0.115384615 | ENTPD8        | ENST00000344119_r73 | c.1159 T>-      | p.W387fs*23  | FRAMESHIFT |
| MA4_22R | Chr12 | 33592372  | A       | -  | 0.123076923 | SYT10         | ENST00000228567_r73 | c.86 T>-        | p.V29fs*29   | FRAMESHIFT |
| MA4_22R | Chr12 | 64062132  | G       | -  | 0.113207547 | DPY19L2       | ENST00000324472_r73 | c.42 C>-        | p.S14fs*20   | FRAMESHIFT |
| MA4_22R | Chr12 | 102591411 | T       | -  | 0.115384615 | PMCH          | ENST00000329406_r73 | c.138 A>-       | p.K46fs*29   | FRAMESHIFT |
| MA4_22R | Chr12 | 108133240 | C       | -  | 0.125       | PRDM4         | ENST00000228437_r73 | c.2013 G>-      | p.E671fs*42  | FRAMESHIFT |
| MA4_22R | Chr12 | 121678328 | -       | TT | 0.12195122  | CAMKK2        | ENST00000392474_r73 | c.1614 ->AA     | p.K538fs*7   | FRAMESHIFT |
| MA4_22R | Chr14 | 95909596  | C       | -  | 0.103896104 | SYNE3         | ENST00000334258_r73 | c.1807 G>-      | p.A603fs*64  | FRAMESHIFT |
| MA4_22R | Chr15 | 42164605  | TGGT    | -  | 0.117647059 | SPTBN5        | ENST00000320955_r73 | c.5057 ACCA>-   | p.D1686fs*44 | FRAMESHIFT |
| MA4_22R | Chr4  | 6037696   | CT      | -  | 0.111111111 | JAKMIP1       | ENST00000409021_r73 | c.2313 AG>-     | p.R771fs*72  | FRAMESHIFT |
| MA4_22R | Chr19 | 10096537  | G       | -  | 0.166666667 | COL5A3        | ENST00000264828_r73 | c.2387 C>-      | p.P796fs*19  | FRAMESHIFT |
| MA4_22R | Chr19 | 17337584  | G       | -  | 0.24        | OCEL1         | ENST00000215061_r73 | c.152 G>-       | p.C51fs*106  | FRAMESHIFT |
| MA4_22R | Chr19 | 56154064  | T       | -  | 0.166666667 | ZNF580        | ENST00000325333_r73 | c.190 T>-       | p.T64fs*127  | FRAMESHIFT |
| MA4_22R | Chr10 | 33017914  | A       | -  | 0.181818182 | C10orf68      | ENST00000302316_r73 | c.689 A>-       | p.E230fs*8   | FRAMESHIFT |

Sheet1

|         |       |           |    |   |             |         |                     |             |             |            |
|---------|-------|-----------|----|---|-------------|---------|---------------------|-------------|-------------|------------|
| MA4_22R | Chr5  | 61833074  | A  | - | 0.136986301 | IPO11   | ENST00000325324_r73 | c.2208 A>-  | p.L736fs*23 | FRAMESHIFT |
| MA4_22R | Chr5  | 72183033  | A  | - | 0.117647059 | TNPO1   | ENST00000337273_r73 | c.1287 A>-  | p.L429fs*12 | FRAMESHIFT |
| MA4_22R | Chr5  | 98109796  | TC | - | 0.130434783 | RGMB    | ENST00000308234_r73 | c.145 TC>-  | p.S49fs*10  | FRAMESHIFT |
| MA4_23  | Chr18 | 43311053  | C  | T | 0.143349807 | SLC14A1 | ENST00000321925_r73 | c.225 C>T   | p.P75P      | SILENT     |
| MA4_23  | Chr19 | 6374247   | C  | G | 0.474226804 | ALKBH7  | ENST00000245812_r73 | c.238 C>G   | p.R80G      | MISSENSE   |
| MA4_23  | Chr19 | 40900136  | G  | A | 0.705932932 | PRX     | ENST00000324001_r73 | c.4123 C>T  | p.R1375W    | MISSENSE   |
| MA4_23  | Chr6  | 63921655  | T  | C | 0.006410997 | FKBP1C  | ENST00000370659_r73 | c.194 T>C   | p.V65A      | MISSENSE   |
| MA4_23  | Chr7  | 100275000 | G  | A | 0.049090909 | GNB2    | ENST00000303210_r73 | c.229 G>A   | p.G77R      | MISSENSE   |
| MA4_23  | Chr20 | 57571837  | C  | T | 0.4588161   | CTSZ    | ENST00000217131_r73 | c.658 G>A   | p.E220K     | MISSENSE   |
| MA4_23  | Chr1  | 115258747 | C  | T | 0.06218555  | NRAS    | ENST00000311936_r73 | c.35 G>A    | p.G12D      | MISSENSE   |
| MA4_23  | Chr12 | 25398284  | C  | A | 0.0203125   | KRAS    | ENST00000311936_r73 | c.437 C>T   | p.A146V     | MISSENSE   |
| MA4_23  | Chr12 | 25378561  | G  | A | 0.02244898  | KRAS    | ENST00000369535_r73 | c.35 G>A    | p.G12D      | MISSENSE   |
| MA4_23  | Chr12 | 124856830 | C  | T | 0.424094635 | NCOR2   | ENST00000405201_r73 | c.2545 G>A  | p.E849K     | MISSENSE   |
| MA4_23  | Chr11 | 58959633  | G  | A | 0.19753824  | DTX4    | ENST00000227451_r73 | c.1284 G>A  | p.T428T     | SILENT     |
| MA4_23  | Chr18 | 54362417  | A  | G | 0.011690047 | WDR7    | ENST00000357574_r73 | c.1345 A>G  | p.M449V     | MISSENSE   |
| MA4_23R | Chr1  | 152188413 | C  | T | 0.134920635 | HRNR    | ENST00000368801_r73 | c.5692 G>A  | p.E1898K    | MISSENSE   |
| MA4_23R | Chr11 | 58959633  | G  | A | 0.194152547 | DTX4    | ENST00000227451_r73 | c.1284 G>A  | p.T428T     | SILENT     |
| MA4_23R | Chr12 | 124856830 | C  | T | 0.418136171 | NCOR2   | ENST00000405201_r73 | c.2545 G>A  | p.E849K     | MISSENSE   |
| MA4_23R | Chr13 | 28597490  | C  | T | 0.186016213 | FLT3    | ENST00000241453_r73 | c.2415 G>A  | p.K805K     | SILENT     |
| MA4_23R | Chr15 | 41989003  | G  | C | 0.170652877 | MGA     | ENST00000566586_r73 | c.1795 G>C  | p.V599L     | MISSENSE   |
| MA4_23R | Chr16 | 70883694  | G  | A | 0.092937092 | HYDIN   | ENST00000393567_r73 | c.12808 C>T | p.H4270Y    | MISSENSE   |
| MA4_23R | Chr16 | 70937582  | G  | A | 0.094841213 | HYDIN   | ENST00000393567_r73 | c.8795 C>T  | p.P2932L    | MISSENSE   |
| MA4_23R | Chr18 | 54362417  | A  | G | 0.181823661 | WDR7    | ENST00000357574_r73 | c.1345 A>G  | p.M449V     | MISSENSE   |
| MA4_23R | Chr20 | 17950950  | G  | A | 0.171070534 | MGME1   | ENST00000377710_r73 | c.448 G>A   | p.E150K     | MISSENSE   |
| MA4_23R | Chr3  | 49756522  | C  | T | 0.236234458 | AMIGO3  | ENST00000320431_r73 | c.377 G>A   | p.R126H     | MISSENSE   |
| MA4_23R | Chr3  | 133368471 | A  | G | 0.219197759 | TOPBP1  | ENST00000260810_r73 | c.1260 T>C  | p.H420H     | SILENT     |
| MA4_23R | Chr4  | 10445952  | T  | C | 0.201005025 | ZNF518B | ENST00000326756_r73 | c.2001 A>G  | p.R667R     | SILENT     |
| MA4_23R | Chr4  | 16077351  | T  | C | 0.186183079 | PROM1   | ENST00000505450_r73 | c.179 A>G   | p.H60R      | MISSENSE   |
| MA4_23R | Chr6  | 114270153 | T  | C | 0.17850901  | HDAC2   | ENST00000519065_r73 | c.831 A>G   | p.L277L     | SILENT     |
| MA4_23R | Chr6  | 117128289 | G  | C | 0.185470706 | GPRC6A  | ENST00000310357_r73 | c.579 C>G   | p.F193L     | MISSENSE   |
| MA4_23R | Chr8  | 144994337 | G  | A | 0.235934664 | PLEC    | ENST00000345136_r73 | c.9652 C>T  | p.R3218W    | MISSENSE   |
| MA4_23R | ChrX  | 24741351  | C  | T | 0.258435032 | POLA1   | ENST00000379059_r73 | c.1149 C>T  | p.I383I     | SILENT     |
| MA4_23R | ChrX  | 35938045  | C  | T | 0.540260608 | CXorf22 | ENST00000297866_r73 | c.129 C>T   | p.I43I      | SILENT     |
| MA4_23R | ChrX  | 35969297  | G  | A | 0.528962956 | CXorf22 | ENST00000297866_r73 | c.706 G>A   | p.V236M     | MISSENSE   |
| MA4_23R | ChrX  | 44171953  | T  | C | 0.385125184 | EFHC2   | ENST00000420999_r73 | c.92 A>G    | p.N31S      | MISSENSE   |
| MA4_23R | ChrX  | 48847497  | T  | C | 0.530505952 | GRIPAP1 | ENST00000376441_r73 | c.483 A>G   | p.E161E     | SILENT     |
| MA4_23R | ChrX  | 139038443 | G  | A | 0.254189944 | CXorf66 | ENST00000370540_r73 | c.698 C>T   | p.P233L     | MISSENSE   |

Sheet1

|         |       |           |   |     |             |          |                     |        |       |            |          |
|---------|-------|-----------|---|-----|-------------|----------|---------------------|--------|-------|------------|----------|
| MA4_23R | Chr1  | 152278814 | C | T   | 0.209754681 | FLG      | ENST00000368799_r73 | c.8548 | G>A   | p.G2850S   | MISSENSE |
| MA4_23R | Chr6  | 32191659  | - | AGC | 0.070879242 | NOTCH4   | ENST00000375023_r73 | c.47   | ->GCT | p.L16 L>RL | MISSENSE |
| MA4_23R | ChrX  | 12937804  | C | T   | 0.532887403 | TLR8     | ENST00000218032_r73 | c.645  | C>T   | p.H215H    | SILENT   |
| MA4_23R | ChrX  | 12939112  | G | C   | 0.546212396 | TLR8     | ENST00000218032_r73 | c.1953 | G>C   | p.L651L    | SILENT   |
| MA4_23R | ChrX  | 22291732  | C | T   | 0.553430079 | ZNF645   | ENST00000323684_r73 | c.624  | C>T   | p.I208I    | SILENT   |
| MA4_23R | ChrX  | 36403036  | A | G   | 0.286539082 | CXorf30  | ENST00000378657_r73 | c.1817 | A>G   | p.H606R    | MISSENSE |
| MA4_23R | ChrX  | 135430044 | T | C   | 0.283352557 | GPR112   | ENST00000394143_r73 | c.4179 | T>C   | p.T1393T   | SILENT   |
| MA4_23R | ChrX  | 16168677  | T | C   | 0.551388889 | GRPR     | ENST00000380289_r73 | c.663  | T>C   | p.I221I    | SILENT   |
| MA4_23R | Chr18 | 43311053  | C | T   | 0.196078431 | SLC14A1  | ENST00000321925_r73 | c.225  | C>T   | p.P75P     | SILENT   |
| MA4_23R | Chr20 | 57571837  | C | T   | 0.2951875   | CTSZ     | ENST00000217131_r73 | c.658  | G>A   | p.E220K    | MISSENSE |
| MA4_23R | ChrX  | 135430483 | T | C   | 0.26859095  | GPR112   | ENST00000394143_r73 | c.4618 | T>C   | p.S1540P   | MISSENSE |
| MA4_23R | Chr1  | 985377    | C | T   | 0.130434783 | AGRN     | ENST00000379370_r73 | c.4839 | C>T   | p.C1613C   | SILENT   |
| MA4_23R | Chr1  | 989216    | C | T   | 0.290322581 | AGRN     | ENST00000379370_r73 | c.5735 | C>T   | p.A1912V   | MISSENSE |
| MA4_23R | Chr1  | 1217690   | C | T   | 0.177777778 | SCNN1D   | ENST00000379116_r73 | c.346  | C>T   | p.R116W    | MISSENSE |
| MA4_23R | Chr1  | 2451298   | G | A   | 0.171875    | PANK4    | ENST00000378466_r73 | c.795  | C>T   | p.L265L    | SILENT   |
| MA4_23R | Chr1  | 11733905  | C | T   | 0.147286822 | FBXO6    | ENST00000376753_r73 | c.879  | C>T   | p.F293F    | SILENT   |
| MA4_23R | Chr1  | 12248855  | G | C   | 0.248554913 | TNFRSF1B | ENST00000376259_r73 | c.81   | G>C   | p.V27V     | SILENT   |
| MA4_23R | Chr1  | 16353911  | A | G   | 0.143884892 | CLCNKA   | ENST00000375692_r73 | c.762  | A>G   | p.A254A    | SILENT   |
| MA4_23R | Chr1  | 16535487  | G | C   | 0.184210526 | ARHGEF19 | ENST00000270747_r73 | c.63   | C>G   | p.H21Q     | MISSENSE |
| MA4_23R | Chr1  | 17603340  | C | T   | 0.163265306 | PADI3    | ENST00000375460_r73 | c.1524 | C>T   | p.H508H    | SILENT   |
| MA4_23R | Chr1  | 22202483  | G | A   | 0.118811881 | HSPG2    | ENST00000374695_r73 | c.3056 | C>T   | p.P1019L   | MISSENSE |
| MA4_23R | Chr1  | 22307376  | C | T   | 0.409090909 | CELA3B   | ENST00000337107_r73 | c.189  | C>T   | p.I63I     | SILENT   |
| MA4_23R | Chr1  | 25883695  | C | T   | 0.183908046 | LDLRAP1  | ENST00000374338_r73 | c.396  | C>T   | p.I132I    | SILENT   |
| MA4_23R | Chr1  | 26665873  | C | G   | 0.234042553 | AIM1L    | ENST00000527815_r73 | c.630  | G>C   | p.K210N    | MISSENSE |
| MA4_23R | Chr1  | 28206363  | G | C   | 0.285714286 | THEMIS2  | ENST00000373925_r73 | c.444  | G>C   | p.L148L    | SILENT   |
| MA4_23R | Chr1  | 29475296  | G | A   | 0.196969697 | SRSF4    | ENST00000373795_r73 | c.1111 | C>T   | p.R371C    | MISSENSE |
| MA4_23R | Chr1  | 32740366  | G | A   | 0.151515152 | LCK      | ENST00000336890_r73 | c.134  | G>A   | p.R45Q     | MISSENSE |
| MA4_23R | Chr1  | 41475187  | A | G   | 0.292307692 | CTPS1    | ENST00000372621_r73 | c.1617 | A>G   | p.P539P    | SILENT   |
| MA4_23R | Chr1  | 45228266  | A | T   | 0.28125     | KIF2C    | ENST00000372224_r73 | c.1907 | A>T   | p.E636V    | MISSENSE |
| MA4_23R | Chr1  | 53569148  | C | T   | 0.096774194 | SLC1A7   | ENST00000371494_r73 | c.567  | G>A   | p.E189E    | SILENT   |
| MA4_23R | Chr1  | 54060404  | G | A   | 0.288888889 | GLIS1    | ENST00000312233_r73 | c.172  | C>T   | p.P58S     | MISSENSE |
| MA4_23R | Chr1  | 79121172  | C | T   | 0.225806452 | IFI44    | ENST00000370747_r73 | c.816  | C>T   | p.N272N    | SILENT   |
| MA4_23R | Chr1  | 91967341  | A | G   | 0.149350649 | CDC7     | ENST00000234626_r73 | c.68   | A>G   | p.Q23R     | MISSENSE |
| MA4_23R | Chr1  | 108697684 | C | T   | 0.152091255 | SLC25A24 | ENST00000565488_r73 | c.743  | G>A   | p.R248H    | MISSENSE |
| MA4_23R | Chr1  | 109808448 | A | G   | 0.177419355 | CELSR2   | ENST00000271332_r73 | c.5819 | A>G   | p.D1940G   | MISSENSE |
| MA4_23R | Chr1  | 114226447 | A | G   | 0.181818182 | MAGI3    | ENST00000307546_r73 | c.4257 | A>G   | p.V1419V   | SILENT   |
| MA4_23R | Chr1  | 117120150 | G | A   | 0.136363636 | IGSF3    | ENST00000369486_r73 | c.3369 | C>T   | p.D1123D   | SILENT   |

Sheet1

|         |       |           |   |   |             |              |                     |             |          |          |
|---------|-------|-----------|---|---|-------------|--------------|---------------------|-------------|----------|----------|
| MA4_23R | Chr1  | 143767466 | G | A | 0.086206897 | PPIAL4G      | ENST00000419275_r73 | c.383 C>T   | p.A128V  | MISSENSE |
| MA4_23R | Chr1  | 144921924 | G | A | 0.080745342 | PDE4DIP      | ENST00000313382_r73 | c.1303 C>T  | p.L435L  | SILENT   |
| MA4_23R | Chr1  | 151810935 | G | C | 0.14        | C2CD4D       | ENST00000454109_r73 | c.531 C>G   | p.A177A  | SILENT   |
| MA4_23R | Chr1  | 152187589 | G | A | 0.201117318 | HRNR         | ENST00000368801_r73 | c.6516 C>T  | p.H2172H | SILENT   |
| MA4_23R | Chr1  | 152187628 | A | G | 0.090909091 | HRNR         | ENST00000368801_r73 | c.6477 T>C  | p.Y2159Y | SILENT   |
| MA4_23R | Chr1  | 152188999 | G | A | 0.120967742 | HRNR         | ENST00000368801_r73 | c.5106 C>T  | p.H1702H | SILENT   |
| MA4_23R | Chr1  | 152190835 | G | A | 0.258064516 | HRNR         | ENST00000368801_r73 | c.3270 C>T  | p.G1090G | SILENT   |
| MA4_23R | Chr1  | 152190945 | C | T | 0.407407407 | HRNR         | ENST00000368801_r73 | c.3160 G>A  | p.E1054K | MISSENSE |
| MA4_23R | Chr1  | 152276699 | A | G | 0.162962963 | FLG          | ENST00000368799_r73 | c.10663 T>C | p.W3555R | MISSENSE |
| MA4_23R | Chr1  | 153967598 | G | A | 0.20661157  | NUP210L      | ENST00000368559_r73 | c.5445 C>T  | p.L1815L | SILENT   |
| MA4_23R | Chr1  | 155004236 | G | A | 0.175       | DCST2        | ENST00000368424_r73 | c.553 C>T   | p.R185W  | MISSENSE |
| MA4_23R | Chr1  | 155152310 | C | T | 0.090909091 | TRIM46       | ENST00000368382_r73 | c.1419 C>T  | p.P473P  | SILENT   |
| MA4_23R | Chr1  | 156518453 | G | A | 0.181818182 | IQGAP3       | ENST00000361170_r73 | c.1913 C>T  | p.A638V  | MISSENSE |
| MA4_23R | Chr1  | 161642985 | G | A | 0.20754717  | FCGR2B       | ENST00000236937_r73 | c.612 G>A   | p.L204L  | SILENT   |
| MA4_23R | Chr1  | 165638548 | C | T | 0.144329897 | ALDH9A1      | ENST00000354775_r73 | c.1070 G>A  | p.R357Q  | MISSENSE |
| MA4_23R | Chr1  | 166961966 | T | C | 0.15        | MAEL         | ENST00000367872_r73 | c.369 T>C   | p.H123H  | SILENT   |
| MA4_23R | Chr1  | 167962499 | G | T | 0.140186916 | DCAF6        | ENST00000367843_r73 | c.724 G>T   | p.A242S  | MISSENSE |
| MA4_23R | Chr1  | 192778206 | A | G | 0.315789474 | RGS2         | ENST00000235382_r73 | c.5 A>G     | p.Q2R    | MISSENSE |
| MA4_23R | Chr1  | 193119478 | C | T | 0.175257732 | CDC73        | ENST00000367435_r73 | c.873 C>T   | p.N291N  | SILENT   |
| MA4_23R | Chr1  | 200613610 | T | C | 0.12345679  | DDX59        | ENST00000331314_r73 | c.1632 A>G  | p.T544T  | SILENT   |
| MA4_23R | Chr1  | 203141167 | C | T | 0.180327869 | MYBPH        | ENST00000255416_r73 | c.510 G>A   | p.E170E  | SILENT   |
| MA4_23R | Chr1  | 207263734 | A | T | 0.24        | C4BPB        | ENST00000367078_r73 | c.140 A>T   | p.Y47F   | MISSENSE |
| MA4_23R | Chr1  | 209805977 | C | T | 0.181818182 | LAMB3        | ENST00000356082_r73 | c.773 G>A   | p.R258H  | MISSENSE |
| MA4_23R | Chr1  | 222802152 | A | G | 0.194444444 | MIA3         | ENST00000344922_r73 | c.1590 A>G  | p.G530G  | SILENT   |
| MA4_23R | Chr1  | 247587870 | G | A | 0.217948718 | NLRP3        | ENST00000391828_r73 | c.1125 G>A  | p.E375E  | SILENT   |
| MA4_23R | Chr1  | 247719734 | C | T | 0.151515152 | GCSAML       | ENST00000366488_r73 | c.55 C>T    | p.P19S   | MISSENSE |
| MA4_23R | Chr1  | 248202474 | A | G | 0.113861386 | OR2L2        | ENST00000366479_r73 | c.905 A>G   | p.Q302R  | MISSENSE |
| MA4_23R | Chr1  | 248616776 | C | T | 0.164285714 | OR2T2        | ENST00000342927_r73 | c.678 C>T   | p.V226V  | SILENT   |
| MA4_23R | Chr10 | 3141522   | G | A | 0.333333333 | PFKP         | ENST00000381125_r73 | c.242 G>A   | p.S81N   | MISSENSE |
| MA4_23R | Chr10 | 3143135   | G | A | 175         | PFKP         | ENST00000381075_r73 | c.183 G>A   | p.R61R   | SILENT   |
| MA4_23R | Chr10 | 13672334  | A | G | 0.106122449 | PRPF18       | ENST00000378572_r73 | c.1023 A>G  | p.A341A  | SILENT   |
| MA4_23R | Chr10 | 13672334  | A | G | 0.106122449 | RP11-295P9.3 | ENST00000595538_r73 | c.98 A>G    | p.A33G   | MISSENSE |
| MA4_23R | Chr10 | 13699231  | C | T | 0.230769231 | FRMD4A       | ENST00000357447_r73 | c.2358 G>A  | p.R786R  | SILENT   |
| MA4_23R | Chr10 | 13702435  | C | T | 0.183673469 | FRMD4A       | ENST00000357447_r73 | c.1779 G>A  | p.Q593Q  | SILENT   |
| MA4_23R | Chr10 | 23319653  | T | C | 0.135021097 | ARMC3        | ENST00000298032_r73 | c.2174 T>C  | p.M725T  | MISSENSE |
| MA4_23R | Chr10 | 24762184  | G | A | 0.178947368 | KIAA1217     | ENST00000376462_r73 | c.634 G>A   | p.G212R  | MISSENSE |
| MA4_23R | Chr10 | 32097609  | G | A | 0.222222222 | ARHGAP12     | ENST00000311380_r73 | c.2178 C>T  | p.D726D  | SILENT   |



Sheet1

|         |       |           |   |   |             |            |                     |             |          |          |
|---------|-------|-----------|---|---|-------------|------------|---------------------|-------------|----------|----------|
| MA4_23R | Chr10 | 50667225  | C | G | 0.157303371 | ERCC6      | ENST00000355832_r73 | c.4118 G>C  | p.R1373T | MISSENSE |
| MA4_23R | Chr10 | 61835633  | G | A | 0.182795699 | ANK3       | ENST00000280772_r73 | c.5006 C>T  | p.P1669L | MISSENSE |
| MA4_23R | Chr10 | 69299372  | T | G | 0.223214286 | CTNNA3     | ENST00000433211_r73 | c.348 A>C   | p.P116P  | SILENT   |
| MA4_23R | Chr10 | 79781312  | G | A | 0.27027027  | POLR3A     | ENST00000372371_r73 | c.1177 C>T  | p.P393S  | MISSENSE |
| MA4_23R | Chr10 | 82013319  | T | G | 0.223076923 | AL359195.1 | ENST00000356374_r73 | c.837 T>G   | p.F279L  | MISSENSE |
| MA4_23R | Chr10 | 94223726  | A | G | 0.196969697 | IDE        | ENST00000265986_r73 | c.2523 T>C  | p.N841N  | SILENT   |
| MA4_23R | Chr10 | 105178380 | G | A | 0.222222222 | PDCD11     | ENST00000369797_r73 | c.2095 G>A  | p.E699K  | MISSENSE |
| MA4_23R | Chr10 | 106075269 | G | A | 0.25        | ITPRIP     | ENST00000337478_r73 | c.541 C>T   | p.R181W  | MISSENSE |
| MA4_23R | Chr10 | 116853561 | G | A | 0.23943662  | ATRNL1     | ENST00000355044_r73 | c.52 G>A    | p.G18R   | MISSENSE |
| MA4_23R | Chr10 | 134218641 | C | T | 0.28        | PWWP2B     | ENST00000305233_r73 | c.637 C>T   | p.R213C  | MISSENSE |
| MA4_23R | Chr10 | 134622089 | A | G | 0.164705882 | TTC40      | ENST00000368586_r73 | c.7984 T>C  | p.W2662R | MISSENSE |
| MA4_23R | Chr11 | 5537147   | C | G | 0.194029851 | UBQLNL     | ENST00000380184_r73 | c.525 G>C   | p.M175I  | MISSENSE |
| MA4_23R | Chr11 | 16838719  | C | T | 0.16025641  | PLEKHA7    | ENST00000355661_r73 | c.1494 G>A  | p.A498A  | SILENT   |
| MA4_23R | Chr11 | 45672170  | G | A | 0.266055046 | CHST1      | ENST00000308064_r73 | c.304 C>T   | p.P102S  | MISSENSE |
| MA4_23R | Chr11 | 46907712  | A | G | 0.172839506 | LRP4       | ENST00000378623_r73 | c.2436 T>C  | p.D812D  | SILENT   |
| MA4_23R | Chr11 | 55541614  | G | T | 0.166666667 | OR5D13     | ENST00000361760_r73 | c.701 G>T   | p.S234I  | MISSENSE |
| MA4_23R | Chr11 | 55872749  | C | T | 0.151394422 | OR8H2      | ENST00000313503_r73 | c.231 C>T   | p.V77V   | SILENT   |
| MA4_23R | Chr11 | 57147126  | G | A | 0.173553719 | PRG3       | ENST00000287143_r73 | c.216 C>T   | p.N72N   | SILENT   |
| MA4_23R | Chr11 | 60610065  | G | A | 0.342342342 | CCDC86     | ENST00000227520_r73 | c.468 G>A   | p.P156P  | SILENT   |
| MA4_23R | Chr11 | 62286188  | G | A | 0.156862745 | AHNAK      | ENST00000378024_r73 | c.15701 C>T | p.P5234L | MISSENSE |
| MA4_23R | Chr11 | 62656046  | A | C | 0.176056338 | SLC3A2     | ENST00000377890_r73 | c.1774 A>C  | p.K592Q  | MISSENSE |
| MA4_23R | Chr11 | 64577243  | G | A | 0.181818182 | MEN1       | ENST00000377326_r73 | c.339 C>T   | p.S113S  | SILENT   |
| MA4_23R | Chr11 | 65359552  | A | G | 0.141791045 | EHBP1L1    | ENST00000309295_r73 | c.4463 A>G  | p.K1488R | MISSENSE |
| MA4_23R | Chr11 | 65359552  | A | G | 0.141791045 | AP001362.1 | ENST00000597463_r73 | c.268 T>C   | p.L90L   | SILENT   |
| MA4_23R | Chr11 | 67209515  | C | T | 0.240963855 | CORO1B     | ENST00000341356_r73 | c.246 G>A   | p.T82T   | SILENT   |
| MA4_23R | Chr11 | 73007938  | C | T | 0.166666667 | P2RY6      | ENST00000540342_r73 | c.375 C>T   | p.Y125Y  | SILENT   |
| MA4_23R | Chr11 | 89133530  | A | G | 0.149122807 | NOX4       | ENST00000343727_r73 | c.792 T>C   | p.S264S  | SILENT   |
| MA4_23R | Chr11 | 102482626 | T | G | 0.174825175 | MMP20      | ENST00000260228_r73 | c.383 A>C   | p.K128T  | MISSENSE |
| MA4_23R | Chr11 | 120980048 | C | T | 0.191011236 | TECTA      | ENST00000392793_r73 | c.327 C>T   | p.G109G  | SILENT   |
| MA4_23R | Chr11 | 120984338 | A | G | 0.107692308 | TECTA      | ENST00000392793_r73 | c.701 A>G   | p.Q234R  | MISSENSE |
| MA4_23R | Chr11 | 121008285 | C | T | 0.163793103 | TECTA      | ENST00000392793_r73 | c.3097 C>T  | p.R1033W | MISSENSE |
| MA4_23R | Chr11 | 121489544 | C | T | 0.153846154 | SORL1      | ENST00000260197_r73 | c.5666 C>T  | p.T1889I | MISSENSE |
| MA4_23R | Chr11 | 123753959 | G | A | 0.157894737 | TMEM225    | ENST00000375026_r73 | c.564 C>T   | p.I188I  | SILENT   |
| MA4_23R | Chr11 | 124267056 | G | A | 0.227799228 | OR8B3      | ENST00000354597_r73 | c.192 C>T   | p.F64F   | SILENT   |
| MA4_23R | Chr11 | 128638142 | C | T | 0.139784946 | FLI1       | ENST00000429175_r73 | c.360 C>T   | p.N120N  | SILENT   |
| MA4_23R | Chr12 | 332338    | G | A | 0.2         | SLC6A13    | ENST00000343164_r73 | c.1374 C>T  | p.F458F  | SILENT   |
| MA4_23R | Chr12 | 674540    | T | C | 0.270833333 | NINJ2      | ENST00000305108_r73 | c.428 A>G   | p.K143R  | MISSENSE |

Sheet1

|         |       |           |   |   |             |           |                     |            |          |          |
|---------|-------|-----------|---|---|-------------|-----------|---------------------|------------|----------|----------|
| MA4_23R | Chr12 | 6640519   | G | A | 0.260869565 | NCAPD2    | ENST00000315579_r73 | c.4147 G>A | p.E1383K | MISSENSE |
| MA4_23R | Chr12 | 7637940   | T | C | 0.130434783 | CD163     | ENST00000359156_r73 | c.2531 A>G | p.N844S  | MISSENSE |
| MA4_23R | Chr12 | 11546192  | G | A | 0.279069767 | PRB2      | ENST00000389362_r73 | c.820 C>T  | p.P274S  | MISSENSE |
| MA4_23R | Chr12 | 51693021  | C | T | 0.225352113 | BIN2      | ENST00000267012_r73 | c.568 G>A  | p.E190K  | MISSENSE |
| MA4_23R | Chr12 | 52585534  | C | T | 0.148148148 | KRT80     | ENST00000313234_r73 | c.153 G>A  | p.S51S   | SILENT   |
| MA4_23R | Chr12 | 53004526  | C | T | 0.213333333 | KRT73     | ENST00000305748_r73 | c.1204 G>A | p.A402T  | MISSENSE |
| MA4_23R | Chr12 | 53200921  | C | G | 0.179104478 | KRT4      | ENST00000551956_r73 | c.1495 G>C | p.G499R  | MISSENSE |
| MA4_23R | Chr12 | 53591607  | C | T | 0.166666667 | ITGB7     | ENST00000267082_r73 | c.330 G>A  | p.P110P  | SILENT   |
| MA4_23R | Chr12 | 56748273  | G | A | 0.175438597 | STAT2     | ENST00000314128_r73 | c.759 C>T  | p.H253H  | SILENT   |
| MA4_23R | Chr12 | 58174038  | G | C | 0.206896552 | METTL21B  | ENST00000300209_r73 | c.290 G>C  | p.G97A   | MISSENSE |
| MA4_23R | Chr12 | 80855816  | T | C | 0.12962963  | PTPRQ     | ENST00000266688_r73 | c.533 T>C  | p.V178A  | MISSENSE |
| MA4_23R | Chr12 | 95604081  | G | A | 0.186915888 | FGD6      | ENST00000343958_r73 | c.979 C>T  | p.R327C  | MISSENSE |
| MA4_23R | Chr12 | 101603543 | G | A | 0.226086957 | SLC5A8    | ENST00000536262_r73 | c.84 C>T   | p.I28I   | SILENT   |
| MA4_23R | Chr12 | 106995090 | C | T | 0.25        | RFX4      | ENST00000357881_r73 | c.36 C>T   | p.G12G   | SILENT   |
| MA4_23R | Chr12 | 107713087 | C | T | 0.175438597 | BTBD11    | ENST00000280758_r73 | c.370 C>T  | p.L124L  | SILENT   |
| MA4_23R | Chr12 | 109994854 | C | T | 0.163636364 | MMAB      | ENST00000545712_r73 | c.732 G>A  | p.S244S  | SILENT   |
| MA4_23R | Chr12 | 129308324 | C | T | 0.191919192 | SLC15A4   | ENST00000266771_r73 | c.165 G>A  | p.T55T   | SILENT   |
| MA4_23R | Chr12 | 133634950 | A | G | 0.172839506 | ZNF84     | ENST00000539354_r73 | c.1649 A>G | p.K550R  | MISSENSE |
| MA4_23R | Chr13 | 29600208  | G | A | 0.209876543 | MTUS2     | ENST00000431530_r73 | c.1403 G>A | p.R468Q  | MISSENSE |
| MA4_23R | Chr13 | 39424254  | T | C | 0.152173913 | FREM2     | ENST00000280481_r73 | c.6459 T>C | p.T2153T | SILENT   |
| MA4_23R | Chr13 | 77581658  | G | A | 0.213483146 | FBXL3     | ENST00000355619_r73 | c.909 C>T  | p.F303F  | SILENT   |
| MA4_23R | Chr13 | 96530055  | T | C | 0.155279503 | UGGT2     | ENST00000376747_r73 | c.3284 A>G | p.Q1095R | MISSENSE |
| MA4_23R | Chr13 | 102250542 | C | T | 0.197916667 | ITGBL1    | ENST00000376180_r73 | c.908 C>T  | p.A303V  | MISSENSE |
| MA4_23R | Chr13 | 103438592 | T | C | 0.201183432 | KDELCL1   | ENST00000376004_r73 | c.1481 A>G | p.H494R  | MISSENSE |
| MA4_23R | Chr14 | 20404080  | T | C | 0.148825065 | OR4K1     | ENST00000285600_r73 | c.255 T>C  | p.F85F   | SILENT   |
| MA4_23R | Chr14 | 23549380  | G | A | 0.257575758 | ACIN1     | ENST00000262710_r73 | c.1338 C>T | p.P446P  | SILENT   |
| MA4_23R | Chr14 | 23566949  | C | T | 0.121212121 | C14orf119 | ENST00000319074_r73 | c.82 C>T   | p.P28S   | MISSENSE |
| MA4_23R | Chr14 | 23861839  | G | C | 0.190909091 | MYH6      | ENST00000356287_r73 | c.3274 C>G | p.Q1092E | MISSENSE |
| MA4_23R | Chr14 | 24769809  | G | A | 0.194029851 | NOP9      | ENST00000267425_r73 | c.443 G>A  | p.S148N  | MISSENSE |
| MA4_23R | Chr14 | 24911441  | G | C | 0.183098592 | SDR39U1   | ENST00000399395_r73 | c.149 C>G  | p.P50R   | MISSENSE |
| MA4_23R | Chr14 | 45711535  | T | G | 0.124223603 | MIS18BP1  | ENST00000310806_r73 | c.845 A>C  | p.N282T  | MISSENSE |
| MA4_23R | Chr14 | 52527005  | T | C | 0.277777778 | NID2      | ENST00000216286_r73 | c.604 A>G  | p.N202D  | MISSENSE |
| MA4_23R | Chr14 | 57858186  | G | A | 0.235294118 | NAA30     | ENST00000556492_r73 | c.511 G>A  | p.E171K  | MISSENSE |
| MA4_23R | Chr14 | 59939804  | G | A | 0.173469388 | L3HYPDH   | ENST00000247194_r73 | c.944 C>T  | p.A315V  | MISSENSE |
| MA4_23R | Chr14 | 63735877  | C | T | 0.279069767 | RHOJ      | ENST00000316754_r73 | c.228 C>T  | p.T76T   | SILENT   |
| MA4_23R | Chr14 | 64488055  | A | G | 0.161290323 | SYNE2     | ENST00000344113_r73 | c.5174 A>G | p.N1725S | MISSENSE |
| MA4_23R | Chr14 | 64954574  | G | C | 0.161290323 | ZBTB25    | ENST00000261683_r73 | c.375 C>G  | p.S125S  | SILENT   |

Sheet1

|         |       |           |   |   |                      |                     |              |          |                  |
|---------|-------|-----------|---|---|----------------------|---------------------|--------------|----------|------------------|
| MA4_23R | Chr14 | 91113353  | G | A | 0.25 TTC7B           | ENST00000328459_r73 | c.1532 C>T   | p.S511L  | MISSENSE         |
| MA4_23R | Chr14 | 100934449 | G | A | 0.154761905 WDR25    | ENST00000554998_r73 | c.914 G>A    | p.R305Q  | MISSENSE         |
| MA4_23R | Chr14 | 105174236 | T | C | 0.214285714 INF2     | ENST00000330634_r73 | c.1632 T>C   | p.H544H  | SILENT           |
| MA4_23R | Chr14 | 105407977 | A | G | 0.245283019 AHNAK2   | ENST00000333244_r73 | c.13811 T>C  | p.M4604T | MISSENSE         |
| MA4_23R | Chr14 | 105411286 | G | A | 0.125 AHNAK2         | ENST00000333244_r73 | c.10502 C>T  | p.P3501L | MISSENSE         |
| MA4_23R | Chr14 | 105411287 | G | A | 0.125 AHNAK2         | ENST00000333244_r73 | c.10501 C>T  | p.P3501S | MISSENSE         |
| MA4_23R | Chr14 | 106829985 | G | A | 0.18 IGHV4-34        | ENST00000390616_r73 | c.61 C>T     | p.P21S   | MISSENSE         |
| MA4_23R | Chr14 | 107083424 | T | C | 0.402173913 IGHV4-59 | ENST00000455737_r73 | c.180 A>G    | p.P60P   | SILENT           |
| MA4_23R | Chr14 | 107179058 | G | A | 0.133333333 IGHV2-70 | ENST00000390634_r73 | c.119 C>T    | p.T40I   | MISSENSE         |
| MA4_23R | Chr15 | 23006346  | T | C | 0.270833333 NIPA2    | ENST00000337451_r73 | c.958 A>G    | p.M320V  | MISSENSE         |
| MA4_23R | Chr15 | 30659641  | C | T | 0.212121212 CHRFA7A  | ENST00000299847_r73 | c.700 G>A    | p.G234R  | MISSENSE         |
| MA4_23R | Chr15 | 35274130  | G | C | 0.203703704 ZNF770   | ENST00000356321_r73 | c.1506 C>G   | p.P502P  | SILENT           |
| MA4_23R | Chr15 | 41961191  | T | C | 0.210884354 MGA      | ENST00000566586_r73 | c.99 T>C     | p.N33N   | SILENT           |
| MA4_23R | Chr15 | 42148796  | T | A | 0.169491525 SPTBN5   | ENST00000320955_r73 | c.8809 A>T   | p.N2937Y | MISSENSE         |
| MA4_23R | Chr15 | 43290373  | A | G | 0.095890411 UBR1     | ENST00000290650_r73 | c.3750 T>C   | p.H1250H | SILENT           |
| MA4_23R | Chr15 | 48779352  | C | T | 0.262820513 FBN1     | ENST00000316623_r73 | c.3509 G>A   | p.R1170H | MISSENSE         |
| MA4_23R | Chr15 | 51830647  | T | C | 0.303030303 DMXL2    | ENST00000251076_r73 | c.1108 A>G   | p.I370V  | MISSENSE         |
| MA4_23R | Chr15 | 63597969  | C | T | 0.164705882 APH1B    | ENST00000261879_r73 | c.763 C>T    | p.R255C  | MISSENSE         |
| MA4_23R | Chr15 | 64008623  | A | C | 0.156862745 HERC1    | ENST00000443617_r73 | c.4028 T>G   | p.F1343C | MISSENSE         |
| MA4_23R | Chr15 | 73615695  | C | T | 0.186440678 HCN4     | ENST00000261917_r73 | c.2739 G>A   | p.A913A  | SILENT           |
| MA4_23R | Chr15 | 74277048  | C | T | 0.202380952 STOML1   | ENST00000564777_r73 | c.802 G>A    | p.V268I  | MISSENSE         |
| MA4_23R | Chr15 | 78393899  | A | G | 0.146067416 SH2D7    | ENST00000328828_r73 | c.1304 A>G   | p.K435R  | MISSENSE         |
| MA4_23R | Chr15 | 78474907  | G | A | 0.133333333 ACSBG1   | ENST00000258873_r73 | c.795 C>T    | p.D265D  | SILENT           |
| MA4_23R | Chr15 | 96877696  | G | A | 0.185185185 NR2F2    | ENST00000421109_r73 | c.435 G>A    | p.S145S  | SILENT           |
| MA4_23R | Chr16 | 334920    | C | T | 0.164634146 PDIA2    | ENST00000219406_r73 | c.583 C>T    | p.Q195*  | NONSENSE         |
| MA4_23R | Chr16 | 420061    | T | G | 0.202380952 MRPL28   | ENST00000199706_r73 | c.158 A>C    | p.N53T   | MISSENSE         |
| MA4_23R | Chr16 | 630878    | C | T | 0.239130435 PIGQ     | ENST00000409527_r73 | c.1437 C>T   | p.A479A  | SILENT           |
| MA4_23R | Chr16 | 1748888   | G | A | 0.194444444 HN1L     | ENST00000248098_r73 | c.462 G>A    | p.Q154Q  | SILENT           |
| MA4_23R | Chr16 | 1837741   | C | T | 0.219178082 NUBP2    | ENST00000262302_r73 | c.398 C>T    | p.T133M  | MISSENSE         |
| MA4_23R | Chr16 | 1841153   | G | A | 0.1 IGFALS           | ENST00000215539_r73 | c.1266 C>T   | p.L422L  | SILENT           |
| MA4_23R | Chr16 | 2140954   | G | A | 0.190476191 PKD1     | ENST00000262304_r73 | c.11934 C>T  | p.D3978D | SILENT           |
| MA4_23R | Chr16 | 2287651   | G | A | 0.162361624 DNASE1L2 | ENST00000564065_r73 | Exon 4 1 G>A | -        | ESSENTIAL_SPLICE |
| MA4_23R | Chr16 | 2571122   | A | G | 0.150943396 ATP6C    | ENST00000569317_r73 | c.217 A>G    | p.K73E   | MISSENSE         |
| MA4_23R | Chr16 | 2571122   | A | G | 0.150943396 AMDHD2   | ENST00000302956_r73 | c.358 A>G    | p.K120E  | MISSENSE         |
| MA4_23R | Chr16 | 2816359   | C | T | 0.151260504 SRRM2    | ENST00000301740_r73 | c.5830 C>T   | p.R1944C | MISSENSE         |
| MA4_23R | Chr16 | 3487431   | G | C | 0.184397163 ZNF597   | ENST00000301744_r73 | c.268 C>G    | p.P90A   | MISSENSE         |
| MA4_23R | Chr16 | 11001797  | C | T | 0.12345679 CIITA     | ENST00000324288_r73 | c.2448 C>T   | p.A816A  | SILENT           |

Sheet1

|         |       |          |   |   |             |               |                     |             |          |          |
|---------|-------|----------|---|---|-------------|---------------|---------------------|-------------|----------|----------|
| MA4_23R | Chr16 | 21213488 | C | T | 0.193181818 | ZP2           | ENST00000574002_r73 | c.1224 G>A  | p.E408E  | SILENT   |
| MA4_23R | Chr16 | 22144284 | C | A | 0.223880597 | VWA3A         | ENST00000389398_r73 | c.1936 C>A  | p.L646I  | MISSENSE |
| MA4_23R | Chr16 | 22182168 | C | T | 0.173913044 | SDR42E2       | ENST00000602312_r73 | c.307 C>T   | p.R103W  | MISSENSE |
| MA4_23R | Chr16 | 22201561 | A | G | 0.28358209  | SDR42E2       | ENST00000602312_r73 | c.1014 A>G  | p.L338L  | SILENT   |
| MA4_23R | Chr16 | 22826046 | T | G | 0.191304348 | HS3ST2        | ENST00000261374_r73 | c.115 T>G   | p.C39G   | MISSENSE |
| MA4_23R | Chr16 | 29063529 | C | T | 0.379310345 | CTB-134H23.2  | ENST00000424293_r73 | c.779 C>T   | p.S260F  | MISSENSE |
| MA4_23R | Chr16 | 29708436 | C | T | 0.134615385 | QPRT          | ENST00000395384_r73 | c.669 C>T   | p.N223N  | SILENT   |
| MA4_23R | Chr16 | 30975492 | C | T | 0.166666667 | SETD1A        | ENST00000262519_r73 | c.717 C>T   | p.N239N  | SILENT   |
| MA4_23R | Chr16 | 46766304 | C | T | 0.164179105 | MYLK3         | ENST00000394809_r73 | c.1278 G>A  | p.T426T  | SILENT   |
| MA4_23R | Chr16 | 57101678 | T | A | 0.17948718  | NLRC5         | ENST00000262510_r73 | c.4437 T>A  | p.D1479E | MISSENSE |
| MA4_23R | Chr16 | 72164240 | G | C | 0.274193548 | PMFBP1        | ENST00000237353_r73 | c.1654 C>G  | p.L552V  | MISSENSE |
| MA4_23R | Chr16 | 72170469 | G | A | 0.213483146 | PMFBP1        | ENST00000237353_r73 | c.1081 C>T  | p.R361W  | MISSENSE |
| MA4_23R | Chr16 | 72821625 | C | T | 0.229166667 | ZFH3          | ENST00000268489_r73 | c.10550 G>A | p.G3517D | MISSENSE |
| MA4_23R | Chr16 | 80583473 | C | T | 0.19205298  | DYNLRB2       | ENST00000305904_r73 | c.172 C>T   | p.R58C   | MISSENSE |
| MA4_23R | Chr16 | 87344867 | G | A | 0.154639175 | C16orf95      | ENST00000567970_r73 | c.366 C>T   | p.T122T  | SILENT   |
| MA4_23R | Chr17 | 2291323  | C | T | 0.168539326 | MNT           | ENST00000174618_r73 | c.828 G>A   | p.K276K  | SILENT   |
| MA4_23R | Chr17 | 2605278  | G | A | 0.190476191 | CLUH          | ENST00000570628_r73 | c.435 C>T   | p.S145S  | SILENT   |
| MA4_23R | Chr17 | 4689601  | A | G | 0.137096774 | VMO1          | ENST00000441199_r73 | c.47 T>C    | p.L16P   | MISSENSE |
| MA4_23R | Chr17 | 8146306  | T | C | 0.215686275 | CTC1          | ENST00000315684_r73 | c.194 A>G   | p.Y65C   | MISSENSE |
| MA4_23R | Chr17 | 15477417 | A | G | 0.196428571 | RP11-385D13.1 | ENST00000455584_r73 | c.2858 T>C  | p.L953P  | MISSENSE |
| MA4_23R | Chr17 | 18566585 | G | A | 0.164021164 | ZNF286B       | ENST00000545289_r73 | c.234 C>T   | p.S78S   | SILENT   |
| MA4_23R | Chr17 | 20354923 | G | A | 0.225806452 | LGALS9B       | ENST00000324290_r73 | c.792 C>T   | p.I264I  | SILENT   |
| MA4_23R | Chr17 | 21319267 | C | T | 0.072519084 | KCNJ12        | ENST00000583088_r73 | c.613 C>T   | p.R205C  | MISSENSE |
| MA4_23R | Chr17 | 31087609 | G | A | 0.185185185 | MYO1D         | ENST00000318217_r73 | c.1072 C>T  | p.R358C  | MISSENSE |
| MA4_23R | Chr17 | 34432664 | T | A | 0.176100629 | CCL4          | ENST00000250151_r73 | c.238 T>A   | p.S80T   | MISSENSE |
| MA4_23R | Chr17 | 38191515 | A | G | 0.213333333 | MED24         | ENST00000356271_r73 | c.375 T>C   | p.S125S  | SILENT   |
| MA4_23R | Chr17 | 42335379 | G | A | 0.149253731 | SLC4A1        | ENST00000262418_r73 | c.1257 C>T  | p.P419P  | SILENT   |
| MA4_23R | Chr17 | 45016025 | C | T | 0.05        | GOSR2         | ENST00000393456_r73 | c.538 C>T   | p.R180W  | MISSENSE |
| MA4_23R | Chr17 | 45016025 | C | T | 0.05        | RP11-156P1.2  | ENST00000571841_r73 | c.538 C>T   | p.R180W  | MISSENSE |
| MA4_23R | Chr17 | 58503639 | C | G | 0.205882353 | C17orf64      | ENST00000269127_r73 | c.271 C>G   | p.H91D   | MISSENSE |
| MA4_23R | Chr17 | 72349656 | C | T | 0.178010471 | KIF19         | ENST00000389916_r73 | c.2244 C>T  | p.G748G  | SILENT   |
| MA4_23R | Chr17 | 73830182 | C | T | 0.188679245 | UNC13D        | ENST00000207549_r73 | c.2341 G>A  | p.V781I  | MISSENSE |
| MA4_23R | Chr17 | 74005802 | C | T | 0.185714286 | EVPL          | ENST00000301607_r73 | c.3484 G>A  | p.E1162K | MISSENSE |
| MA4_23R | Chr17 | 76482177 | G | A | 0.210526316 | DNAH17        | ENST00000585328_r73 | c.7125 C>T  | p.I2375I | SILENT   |
| MA4_23R | Chr17 | 77769143 | C | T | 0.309859155 | CBX8          | ENST00000269385_r73 | c.461 G>A   | p.R154Q  | MISSENSE |
| MA4_23R | Chr17 | 80206865 | G | A | 0.2         | CSNK1D        | ENST00000314028_r73 | c.1083 C>T  | p.S361S  | SILENT   |
| MA4_23R | Chr18 | 6999496  | G | A | 0.218181818 | LAMA1         | ENST00000389658_r73 | c.4611 C>T  | p.L1537L | SILENT   |

Sheet1

|         |       |          |   |   |             |         |                     |            |          |          |
|---------|-------|----------|---|---|-------------|---------|---------------------|------------|----------|----------|
| MA4_23R | Chr18 | 9204535  | A | G | 0.22818792  | ANKRD12 | ENST00000262126_r73 | c.297 A>G  | p.T99T   | SILENT   |
| MA4_23R | Chr18 | 10485561 | G | A | 0.179310345 | APCDD1  | ENST00000355285_r73 | c.877 G>A  | p.G293R  | MISSENSE |
| MA4_23R | Chr18 | 13029750 | A | G | 0.168316832 | CEP192  | ENST00000506447_r73 | c.1139 A>G | p.N380S  | MISSENSE |
| MA4_23R | Chr18 | 34298589 | C | T | 0.185483871 | FHOD3   | ENST00000257209_r73 | c.2803 C>T | p.L935L  | SILENT   |
| MA4_23R | Chr18 | 46343626 | A | G | 0.183673469 | CTIF    | ENST00000256413_r73 | c.1406 A>G | p.Q469R  | MISSENSE |
| MA4_23R | Chr18 | 57013161 | T | A | 0.326530612 | LMAN1   | ENST00000251047_r73 | c.945 A>T  | p.Q315H  | MISSENSE |
| MA4_23R | Chr19 | 687035   | T | A | 0.174193548 | PRSS57  | ENST00000329267_r73 | c.535 A>T  | p.K179*  | NONSENSE |
| MA4_23R | Chr19 | 1010673  | G | A | 0.255319149 | TMEM259 | ENST00000356663_r73 | c.1539 C>T | p.P513P  | SILENT   |
| MA4_23R | Chr19 | 3942175  | C | T | 0.179104478 | NMRK2   | ENST00000168977_r73 | c.597 C>T  | p.A199A  | SILENT   |
| MA4_23R | Chr19 | 6183185  | C | A | 0.211864407 | ACSBG2  | ENST00000591403_r73 | c.1224 C>A | p.F408L  | MISSENSE |
| MA4_23R | Chr19 | 11508199 | C | T | 0.164556962 | RGL3    | ENST00000380456_r73 | c.1821 G>A | p.P607P  | SILENT   |
| MA4_23R | Chr19 | 11512897 | C | T | 0.2         | RGL3    | ENST00000380456_r73 | c.1356 G>A | p.R452R  | SILENT   |
| MA4_23R | Chr19 | 11618630 | G | A | 0.20952381  | ECSIT   | ENST00000270517_r73 | c.832 C>T  | p.R278C  | MISSENSE |
| MA4_23R | Chr19 | 12984928 | C | T | 0.234567901 | MAST1   | ENST00000251472_r73 | c.3957 C>T | p.G1319G | SILENT   |
| MA4_23R | Chr19 | 13218667 | G | A | 0.226890756 | TRMT1   | ENST00000221504_r73 | c.1317 C>T | p.A439A  | SILENT   |
| MA4_23R | Chr19 | 16962292 | A | G | 0.222222222 | SIN3B   | ENST00000379803_r73 | c.796 A>G  | p.S266G  | MISSENSE |
| MA4_23R | Chr19 | 19038597 | C | T | 0.191489362 | DDX49   | ENST00000247003_r73 | c.1125 C>T | p.S375S  | SILENT   |
| MA4_23R | Chr19 | 20989454 | T | C | 0.212765957 | ZNF66   | ENST00000344519_r73 | c.1048 T>C | p.F350L  | MISSENSE |
| MA4_23R | Chr19 | 21300018 | G | A | 0.164948454 | ZNF714  | ENST00000596143_r73 | c.548 G>A  | p.R183Q  | MISSENSE |
| MA4_23R | Chr19 | 22271303 | C | T | 0.206896552 | ZNF257  | ENST00000594947_r73 | c.751 C>T  | p.H251Y  | MISSENSE |
| MA4_23R | Chr19 | 35173717 | T | A | 0.135294118 | ZNF302  | ENST00000457781_r73 | c.45 T>A   | p.H15Q   | MISSENSE |
| MA4_23R | Chr19 | 39281364 | G | A | 0.208333333 | LGALS7B | ENST00000314980_r73 | c.131 G>A  | p.G44D   | MISSENSE |
| MA4_23R | Chr19 | 39880149 | C | T | 0.213333333 | PAF1    | ENST00000221265_r73 | c.330 G>A  | p.E110E  | SILENT   |
| MA4_23R | Chr19 | 40900136 | G | A | 0.225352113 | PRX     | ENST00000324001_r73 | c.4123 C>T | p.R1375W | MISSENSE |
| MA4_23R | Chr19 | 46915525 | C | T | 0.25        | CCDC8   | ENST00000307522_r73 | c.543 G>A  | p.E181E  | SILENT   |
| MA4_23R | Chr19 | 49116359 | T | C | 0.148648649 | FAM83E  | ENST00000263266_r73 | c.271 A>G  | p.T91A   | MISSENSE |
| MA4_23R | Chr19 | 49206550 | G | A | 0.175438597 | FUT2    | ENST00000425340_r73 | c.337 G>A  | p.V113M  | MISSENSE |
| MA4_23R | Chr19 | 54697199 | A | G | 0.296296296 | TSEN34  | ENST00000302937_r73 | c.915 A>G  | p.Q305Q  | SILENT   |
| MA4_23R | Chr19 | 54723078 | G | A | 0.134020619 | LILRB3  | ENST00000391750_r73 | c.1346 C>T | p.S449L  | MISSENSE |
| MA4_23R | Chr19 | 55237603 | G | A | 0.201680672 | KIR3DL3 | ENST00000291860_r73 | c.155 G>A  | p.R52H   | MISSENSE |
| MA4_23R | Chr19 | 55241172 | A | C | 0.128654971 | KIR3DL3 | ENST00000291860_r73 | c.869 A>C  | p.N290T  | MISSENSE |
| MA4_23R | Chr19 | 55246812 | G | C | 0.223880597 | KIR3DL3 | ENST00000291860_r73 | c.1042 G>C | p.A348P  | MISSENSE |
| MA4_23R | Chr19 | 55247449 | A | T | 0.217105263 | KIR3DL3 | ENST00000291860_r73 | c.1119 A>T | p.E373D  | MISSENSE |
| MA4_23R | Chr19 | 55255361 | G | A | 0.134502924 | KIR2DL3 | ENST00000342376_r73 | c.489 G>A  | p.E163E  | SILENT   |
| MA4_23R | Chr19 | 55317439 | C | T | 0.254237288 | KIR2DL4 | ENST00000359085_r73 | c.395 C>T  | p.P132L  | MISSENSE |
| MA4_23R | Chr19 | 55333275 | G | T | 0.150684932 | KIR3DL1 | ENST00000391728_r73 | c.911 G>T  | p.W304L  | MISSENSE |
| MA4_23R | Chr19 | 55363504 | G | A | 0.24822695  | KIR3DL2 | ENST00000326321_r73 | c.122 G>A  | p.R41Q   | MISSENSE |

Sheet1

|         |       |           |   |   |                       |                     |             |           |          |
|---------|-------|-----------|---|---|-----------------------|---------------------|-------------|-----------|----------|
| MA4_23R | Chr19 | 58117099  | G | C | 0.2 ZNF530            | ENST00000332854_r73 | c.206 G>C   | p.S69T    | MISSENSE |
| MA4_23R | Chr2  | 21258553  | T | A | 0.25 APOB             | ENST00000233242_r73 | c.721 A>T   | p.S241C   | MISSENSE |
| MA4_23R | Chr2  | 27303740  | C | T | 0.176470588 EMILIN1   | ENST00000380320_r73 | c.431 C>T   | p.P144L   | MISSENSE |
| MA4_23R | Chr2  | 28843469  | T | C | 0.157142857 PLB1      | ENST00000327757_r73 | c.3386 T>C  | p.I1129T  | MISSENSE |
| MA4_23R | Chr2  | 29274749  | C | T | 0.162601626 FAM179A   | ENST00000379558_r73 | c.2850 C>T  | p.R950R   | SILENT   |
| MA4_23R | Chr2  | 29416768  | G | A | 0.198412698 ALK       | ENST00000389048_r73 | c.4185 C>T  | p.T1395T  | SILENT   |
| MA4_23R | Chr2  | 47202156  | C | T | 0.274509804 TTC7A     | ENST00000319190_r73 | c.562 C>T   | p.R188C   | MISSENSE |
| MA4_23R | Chr2  | 61331001  | G | A | 0.146153846 KIAA1841  | ENST00000402291_r73 | c.1379 G>A  | p.R460K   | MISSENSE |
| MA4_23R | Chr2  | 65300035  | T | G | 0.175879397 CEP68     | ENST00000377990_r73 | c.1805 T>G  | p.F602C   | MISSENSE |
| MA4_23R | Chr2  | 71206851  | G | A | 0.172413793 ANKRD53   | ENST00000272421_r73 | c.478 G>A   | p.V160I   | MISSENSE |
| MA4_23R | Chr2  | 74699368  | G | A | 0.159763314 MRPL53    | ENST00000258105_r73 | c.217 C>T   | p.R73C    | MISSENSE |
| MA4_23R | Chr2  | 85780132  | C | T | 0.21969697 GGCX       | ENST00000233838_r73 | c.1217 G>A  | p.R406H   | MISSENSE |
| MA4_23R | Chr2  | 90121841  | C | A | 0.155339806 IGKV1D-17 | ENST00000483379_r73 | c.59 C>A    | p.A20D    | MISSENSE |
| MA4_23R | Chr2  | 111551680 | A | G | 0.157894737 ACOXL     | ENST00000439055_r73 | c.274 A>G   | p.M92V    | MISSENSE |
| MA4_23R | Chr2  | 112578860 | G | A | 0.25 ANAPC1           | ENST00000341068_r73 | c.3162 C>T  | p.Y1054Y  | SILENT   |
| MA4_23R | Chr2  | 127816628 | C | T | 0.1875 BIN1           | ENST00000357970_r73 | c.961 G>A   | p.G321R   | MISSENSE |
| MA4_23R | Chr2  | 133542131 | A | T | 0.157232704 NCKAP5    | ENST00000409261_r73 | c.2253 T>A  | p.V751V   | SILENT   |
| MA4_23R | Chr2  | 150427678 | T | C | 0.256410256 MMADHC    | ENST00000303319_r73 | c.617 A>G   | p.N206S   | MISSENSE |
| MA4_23R | Chr2  | 152320764 | A | G | 0.163043478 RIF1      | ENST00000444746_r73 | c.4730 A>G  | p.N1577S  | MISSENSE |
| MA4_23R | Chr2  | 165772426 | C | T | 0.177339902 SLC38A11  | ENST00000303735_r73 | c.441 G>A   | p.G147G   | SILENT   |
| MA4_23R | Chr2  | 179397368 | G | A | 0.18627451 TTN        | ENST00000342992_r73 | c.96270 C>T | p.I32090I | SILENT   |
| MA4_23R | Chr2  | 207003230 | C | T | 0.164835165 NDUFS1    | ENST00000233190_r73 | c.1371 G>A  | p.S457S   | SILENT   |
| MA4_23R | Chr2  | 209358019 | C | T | 0.238095238 PTH2R     | ENST00000272847_r73 | c.1288 C>T  | p.R430W   | MISSENSE |
| MA4_23R | Chr2  | 211018503 | T | C | 0.180257511 KANSL1L   | ENST00000281772_r73 | c.804 A>G   | p.Q268Q   | SILENT   |
| MA4_23R | Chr2  | 219414580 | C | T | 0.094017094 USP37     | ENST00000258399_r73 | c.381 G>A   | p.R127R   | SILENT   |
| MA4_23R | Chr2  | 220161758 | C | T | 0.237288136 PTPRN     | ENST00000409251_r73 | c.2098 G>A  | p.A700T   | MISSENSE |
| MA4_23R | Chr2  | 220493959 | G | A | 0.346938776 SLC4A3    | ENST00000358055_r73 | c.311 G>A   | p.R104Q   | MISSENSE |
| MA4_23R | Chr2  | 225661080 | A | C | 0.211640212 DOCK10    | ENST00000258390_r73 | c.4891 T>G  | p.S1631A  | MISSENSE |
| MA4_23R | Chr2  | 228855865 | G | A | 0.196581197 SPHKAP    | ENST00000392056_r73 | c.4810 C>T  | p.P1604S  | MISSENSE |
| MA4_23R | Chr2  | 230723502 | T | C | 0.141025641 TRIP12    | ENST00000283943_r73 | c.887 A>G   | p.Q296R   | MISSENSE |
| MA4_23R | Chr2  | 233413012 | G | A | 0.409090909 TIGD1     | ENST00000408957_r73 | c.1581 C>T  | p.I527I   | SILENT   |
| MA4_23R | Chr2  | 238449108 | G | T | 0.394736842 MLPH      | ENST00000264605_r73 | c.1222 G>T  | p.A408S   | MISSENSE |
| MA4_23R | Chr2  | 242371116 | T | C | 0.173913044 FARP2     | ENST00000264042_r73 | c.794 T>C   | p.F265S   | MISSENSE |
| MA4_23R | Chr20 | 633682    | T | C | 0.243902439 SRXN1     | ENST00000381962_r73 | c.148 A>G   | p.I50V    | MISSENSE |
| MA4_23R | Chr20 | 3687772   | C | T | 0.273972603 SIGLEC1   | ENST00000344754_r73 | c.4 G>A     | p.G2S     | MISSENSE |
| MA4_23R | Chr20 | 13280052  | G | A | 0.106382979 ISM1      | ENST00000262487_r73 | c.1341 G>A  | p.E447E   | SILENT   |
| MA4_23R | Chr20 | 33875140  | C | T | 0.136752137 FAM83C    | ENST00000374408_r73 | c.1442 G>A  | p.G481D   | MISSENSE |

Sheet1

|         |       |           |   |   |             |              |                     |               |          |                  |
|---------|-------|-----------|---|---|-------------|--------------|---------------------|---------------|----------|------------------|
| MA4_23R | Chr20 | 39831546  | C | T | 0.188571429 | ZHX3         | ENST00000309060_r73 | c.2011 G>A    | p.E671K  | MISSENSE         |
| MA4_23R | Chr20 | 43727834  | C | T | 0.337209302 | KCNS1        | ENST00000306117_r73 | c.44 G>A      | p.R15Q   | MISSENSE         |
| MA4_23R | Chr20 | 57246312  | A | C | 0.112244898 | STX16        | ENST00000355957_r73 | c.700 A>C     | p.N234H  | MISSENSE         |
| MA4_23R | Chr20 | 57246312  | A | C | 0.112244898 | STX16-NPEPL1 | ENST00000530122_r73 | c.751 A>C     | p.N251H  | MISSENSE         |
| MA4_23R | Chr20 | 57571837  | C | T | 0.284023669 | CTSZ         | ENST00000217131_r73 | c.658 G>A     | p.E220K  | MISSENSE         |
| MA4_23R | Chr20 | 61459319  | C | T | 0.213483146 | COL9A3       | ENST00000343916_r73 | c.891 C>T     | p.S297S  | SILENT           |
| MA4_23R | Chr20 | 62195536  | G | A | 0.188679245 | HELZ2        | ENST00000427522_r73 | c.2932 C>T    | p.R978W  | MISSENSE         |
| MA4_23R | Chr21 | 30380903  | G | A | 0.142857143 | RWDD2B       | ENST00000493196_r73 | c.107 C>T     | p.A36V   | MISSENSE         |
| MA4_23R | Chr21 | 34837660  | A | G | 0.202898551 | TMEM50B      | ENST00000420455_r73 | c.269 T>C     | p.L90S   | MISSENSE         |
| MA4_23R | Chr21 | 34922515  | G | A | 0.194444444 | SON          | ENST00000356577_r73 | c.978 G>A     | p.M326I  | MISSENSE         |
| MA4_23R | Chr21 | 40552338  | T | G | 0.139705882 | PSMG1        | ENST00000331573_r73 | c.266 A>C     | p.N89T   | MISSENSE         |
| MA4_23R | Chr21 | 43240044  | G | A | 0.191489362 | PRDM15       | ENST00000398548_r73 | c.2265 C>T    | p.H755H  | SILENT           |
| MA4_23R | Chr22 | 23523753  | C | T | 0.195121951 | BCR          | ENST00000305877_r73 | c.606 C>T     | p.S202S  | SILENT           |
| MA4_23R | Chr22 | 29876996  | G | A | 0.25        | NEFH         | ENST00000310624_r73 | c.745 G>A     | p.G249S  | MISSENSE         |
| MA4_23R | Chr22 | 32909761  | C | G | 0.223529412 | SYN3         | ENST00000358763_r73 | c.1661 G>C    | p.R554P  | MISSENSE         |
| MA4_23R | Chr22 | 37414181  | A | G | 0.461538462 | TST          | ENST00000403892_r73 | c.593 T>C     | p.V198A  | MISSENSE         |
| MA4_23R | Chr22 | 37890166  | C | A | 0.166666667 | CARD10       | ENST00000403299_r73 | c.2403 G>T    | p.R801R  | SILENT           |
| MA4_23R | Chr22 | 38211281  | C | G | 0.235294118 | GCAT         | ENST00000323205_r73 | c.803 C>G     | p.T268R  | MISSENSE         |
| MA4_23R | Chr22 | 39621819  | G | A | 0.1875      | PDGFB        | ENST00000331163_r73 | c.635 C>T     | p.T212M  | MISSENSE         |
| MA4_23R | Chr22 | 39917587  | C | T | 0.205882353 | ATF4         | ENST00000404241_r73 | c.137 C>T     | p.P46L   | MISSENSE         |
| MA4_23R | Chr22 | 45255677  | A | G | 0.166666667 | PRR5-ARHGAP8 | ENST00000361473_r73 | c.1337 A>G    | p.Y446C  | MISSENSE         |
| MA4_23R | Chr22 | 45255677  | A | G | 0.166666667 | ARHGAP8      | ENST00000389774_r73 | c.1037 A>G    | p.Y346C  | MISSENSE         |
| MA4_23R | Chr22 | 46658198  | A | G | 0.253012048 | PKDREJ       | ENST00000253255_r73 | c.1022 T>C    | p.L341P  | MISSENSE         |
| MA4_23R | Chr22 | 50885863  | C | T | 0.212765957 | SBF1         | ENST00000380817_r73 | c.5471 G>A    | p.R1824H | MISSENSE         |
| MA4_23R | Chr3  | 16358506  | A | G | 0.08974359  | RFTN1        | ENST00000334133_r73 | c.1566 T>C    | p.P522P  | SILENT           |
| MA4_23R | Chr3  | 32995349  | C | T | 0.192090396 | CCR4         | ENST00000330953_r73 | c.435 C>T     | p.S145S  | SILENT           |
| MA4_23R | Chr3  | 40557438  | G | A | 0.196969697 | ZNF620       | ENST00000314529_r73 | c.353 G>A     | p.G118D  | MISSENSE         |
| MA4_23R | Chr3  | 46008939  | G | A | 0.192307692 | FYCO1        | ENST00000296137_r73 | c.1887 C>T    | p.V629V  | SILENT           |
| MA4_23R | Chr3  | 49060313  | C | T | 0.25974026  | NDUFAF3      | ENST00000326912_r73 | c.171 C>T     | p.I57I   | SILENT           |
| MA4_23R | Chr3  | 49837207  | C | T | 0.192771084 | CDHR4        | ENST00000412678_r73 | c.39 G>A      | p.P13P   | SILENT           |
| MA4_23R | Chr3  | 49850929  | A | G | 0.25        | UBA7         | ENST00000333486_r73 | c.208 T>C     | p.S70P   | MISSENSE         |
| MA4_23R | Chr3  | 52283025  | C | T | 0.175572519 | PPM1M        | ENST00000409502_r73 | c.396 C>T     | p.L132L  | SILENT           |
| MA4_23R | Chr3  | 52398913  | A | G | 0.154589372 | DNAH1        | ENST00000420323_r73 | c.5396 A>G    | p.K1799R | MISSENSE         |
| MA4_23R | Chr3  | 52661351  | G | A | 0.235294118 | PBRM1        | ENST00000394830_r73 | c.1479 C>T    | p.I493I  | SILENT           |
| MA4_23R | Chr3  | 52858459  | G | A | 0.264285714 | ITIH4        | ENST00000266041_r73 | c.999 C>T     | p.N333N  | SILENT           |
| MA4_23R | Chr3  | 101571742 | C | G | 0.192546584 | NFKBIZ       | ENST00000394054_r73 | c.173 C>G     | p.T58R   | MISSENSE         |
| MA4_23R | Chr3  | 108781994 | C | T | 0.151898734 | MORC1        | ENST00000232603_r73 | Exon 10 5 G>A | -        | ESSENTIAL_SPLICE |

Sheet1

|         |      |           |   |   |             |            |                     |             |          |          |
|---------|------|-----------|---|---|-------------|------------|---------------------|-------------|----------|----------|
| MA4_23R | Chr3 | 122420142 | G | A | 0.220994475 | PARP14     | ENST00000474629_r73 | c.2741 G>A  | p.R914Q  | MISSENSE |
| MA4_23R | Chr3 | 132196983 | G | A | 0.16        | DNAJC13    | ENST00000260818_r73 | c.2708 G>A  | p.R903K  | MISSENSE |
| MA4_23R | Chr3 | 145782480 | A | G | 0.227272727 | AC107021.1 | ENST00000422482_r73 | c.101 A>G   | p.H34R   | MISSENSE |
| MA4_23R | Chr3 | 150834162 | A | G | 0.183206107 | MED12L     | ENST00000474524_r73 | c.137 A>G   | p.N46S   | MISSENSE |
| MA4_23R | Chr3 | 169485469 | G | A | 0.189655172 | ACTRT3     | ENST00000330368_r73 | c.870 C>T   | p.F290F  | SILENT   |
| MA4_23R | Chr3 | 184071136 | G | A | 0.227722772 | CLCN2      | ENST00000265593_r73 | c.1930 C>T  | p.R644C  | MISSENSE |
| MA4_23R | Chr3 | 184101429 | C | T | 0.243243243 | CHRD       | ENST00000204604_r73 | c.1439 C>T  | p.T480M  | MISSENSE |
| MA4_23R | Chr3 | 193081090 | C | T | 0.1875      | ATP13A5    | ENST00000342358_r73 | c.319 G>A   | p.E107K  | MISSENSE |
| MA4_23R | Chr4 | 1388564   | T | C | 0.272727273 | CRIPAK     | ENST00000324803_r73 | c.265 T>C   | p.C89R   | MISSENSE |
| MA4_23R | Chr4 | 6303769   | G | A | 0.201970443 | WFS1       | ENST00000503569_r73 | c.2247 G>A  | p.T749T  | SILENT   |
| MA4_23R | Chr4 | 17841383  | A | G | 0.210526316 | NCAPG      | ENST00000251496_r73 | c.2551 A>G  | p.T851A  | MISSENSE |
| MA4_23R | Chr4 | 40339286  | C | G | 0.157894737 | CHRNA9     | ENST00000310169_r73 | c.270 C>G   | p.A90A   | SILENT   |
| MA4_23R | Chr4 | 48844693  | A | T | 0.235294118 | OCIAD1     | ENST00000264312_r73 | c.180 A>T   | p.G60G   | SILENT   |
| MA4_23R | Chr4 | 56847506  | A | G | 0.227722772 | CEP135     | ENST00000257287_r73 | c.1740 A>G  | p.R580R  | SILENT   |
| MA4_23R | Chr4 | 70146902  | T | C | 0.4375      | UGT2B28    | ENST00000335568_r73 | c.684 T>C   | p.D228D  | SILENT   |
| MA4_23R | Chr4 | 89300241  | C | A | 0.404761905 | HERC6      | ENST00000380265_r73 | c.168 C>A   | p.G56G   | SILENT   |
| MA4_23R | Chr4 | 91230194  | A | C | 0.230769231 | CCSER1     | ENST00000509176_r73 | c.759 A>C   | p.T253T  | SILENT   |
| MA4_23R | Chr4 | 106190798 | G | A | 0.101941748 | TET2       | ENST00000380013_r73 | c.4076 G>A  | p.R1359H | MISSENSE |
| MA4_23R | Chr4 | 122062982 | G | A | 0.189189189 | TNIP3      | ENST00000057513_r73 | c.874 C>T   | p.R292W  | MISSENSE |
| MA4_23R | Chr4 | 141446698 | T | G | 0.177514793 | ELMOD2     | ENST00000323570_r73 | c.116 T>G   | p.V39G   | MISSENSE |
| MA4_23R | Chr4 | 144922436 | T | G | 0.063926941 | GYPB       | ENST00000502664_r73 | c.38 A>C    | p.E13A   | MISSENSE |
| MA4_23R | Chr4 | 154626370 | C | T | 0.173913044 | TLR2       | ENST00000260010_r73 | c.2311 C>T  | p.R771W  | MISSENSE |
| MA4_23R | Chr4 | 155490820 | A | G | 0.216216216 | FGB        | ENST00000302068_r73 | c.1113 A>G  | p.S371S  | SILENT   |
| MA4_23R | Chr5 | 428022    | C | T | 0.176470588 | AHRR       | ENST00000505113_r73 | c.821 C>T   | p.A274V  | MISSENSE |
| MA4_23R | Chr5 | 1087084   | G | A | 0.135483871 | SLC12A7    | ENST00000264930_r73 | c.609 C>T   | p.L203L  | SILENT   |
| MA4_23R | Chr5 | 1217004   | G | A | 0.174603175 | SLC6A19    | ENST00000304460_r73 | c.1117 G>A  | p.A373T  | MISSENSE |
| MA4_23R | Chr5 | 13717485  | G | A | 0.145833333 | DNAH5      | ENST00000265104_r73 | c.12644 C>T | p.A4215V | MISSENSE |
| MA4_23R | Chr5 | 32058127  | C | T | 0.126213592 | PDZD2      | ENST00000438447_r73 | c.2118 C>T  | p.S706S  | SILENT   |
| MA4_23R | Chr5 | 93966286  | G | A | 0.142857143 | ANKRD32    | ENST00000265140_r73 | c.269 G>A   | p.W90*   | NONSENSE |
| MA4_23R | Chr5 | 107717088 | C | T | 0.217391304 | FBXL17     | ENST00000542267_r73 | c.305 G>A   | p.R102Q  | MISSENSE |
| MA4_23R | Chr5 | 126755873 | G | A | 0.098591549 | MEGF10     | ENST00000503335_r73 | c.1564 G>A  | p.G522R  | MISSENSE |
| MA4_23R | Chr5 | 131008132 | T | C | 0.179661017 | FNIP1      | ENST00000307968_r73 | c.1921 A>G  | p.K641E  | MISSENSE |
| MA4_23R | Chr5 | 131329826 | C | G | 0.189473684 | ACSL6      | ENST00000379264_r73 | c.168 G>C   | p.V56V   | SILENT   |
| MA4_23R | Chr5 | 132150837 | C | G | 0.140186916 | SOWAHA     | ENST00000378693_r73 | c.1524 C>G  | p.A508A  | SILENT   |
| MA4_23R | Chr5 | 133473774 | G | A | 0.307692308 | TCF7       | ENST00000342854_r73 | c.466 G>A   | p.G156S  | MISSENSE |
| MA4_23R | Chr5 | 138260288 | C | T | 0.297297297 | CTNNA1     | ENST00000302763_r73 | c.1636 C>T  | p.R546*  | NONSENSE |
| MA4_23R | Chr5 | 139060486 | G | A | 0.159763314 | CXXC5      | ENST00000302517_r73 | c.378 G>A   | p.A126A  | SILENT   |



Sheet1

|         |      |           |   |   |             |          |                     |             |          |          |
|---------|------|-----------|---|---|-------------|----------|---------------------|-------------|----------|----------|
| MA4_23R | Chr5 | 139714273 | A | G | 0.156028369 | HBEGF    | ENST00000230990_r73 | c.615 T>C   | p.T205T  | SILENT   |
| MA4_23R | Chr5 | 145843260 | T | C | 0.131428571 | TCERG1   | ENST00000296702_r73 | c.1039 T>C  | p.S347P  | MISSENSE |
| MA4_23R | Chr5 | 149578896 | C | T | 0.164179105 | SLC6A7   | ENST00000230671_r73 | c.690 C>T   | p.L230L  | SILENT   |
| MA4_23R | Chr5 | 162939175 | A | G | 0.205882353 | MAT2B    | ENST00000280969_r73 | c.198 A>G   | p.A66A   | SILENT   |
| MA4_23R | Chr5 | 167630831 | A | C | 0.183673469 | TENM2    | ENST00000518659_r73 | c.3568 A>C  | p.K1190Q | MISSENSE |
| MA4_23R | Chr5 | 171509391 | C | T | 0.104651163 | STK10    | ENST00000176763_r73 | c.1928 G>A  | p.R643H  | MISSENSE |
| MA4_23R | Chr5 | 174869692 | G | C | 0.192307692 | DRD1     | ENST00000393752_r73 | c.411 C>G   | p.P137P  | SILENT   |
| MA4_23R | Chr5 | 176832999 | T | C | 0.113636364 | F12      | ENST00000253496_r73 | c.179 A>G   | p.K60R   | MISSENSE |
| MA4_23R | Chr5 | 178358521 | G | T | 0.161290323 | ZFP2     | ENST00000361362_r73 | c.207 G>T   | p.M69I   | MISSENSE |
| MA4_23R | Chr5 | 179260201 | G | A | 0.176470588 | SQSTM1   | ENST00000389805_r73 | c.924 G>A   | p.A308A  | SILENT   |
| MA4_23R | Chr6 | 656694    | G | C | 0.182926829 | HUS1B    | ENST00000380907_r73 | c.251 C>G   | p.A84G   | MISSENSE |
| MA4_23R | Chr6 | 10634514  | C | T | 0.202702703 | GCNT6    | ENST00000379591_r73 | c.357 C>T   | p.A119A  | SILENT   |
| MA4_23R | Chr6 | 26156843  | G | A | 0.210526316 | HIST1H1E | ENST00000304218_r73 | c.225 G>A   | p.K75K   | SILENT   |
| MA4_23R | Chr6 | 31779134  | T | C | 0.205479452 | HSPA1L   | ENST00000375654_r73 | c.616 A>G   | p.T206A  | MISSENSE |
| MA4_23R | Chr6 | 32905086  | G | A | 0.168316832 | HLA-DMB  | ENST00000418107_r73 | c.485 C>T   | p.A162V  | MISSENSE |
| MA4_23R | Chr6 | 34208668  | C | T | 0.227272727 | HMGA1    | ENST00000311487_r73 | c.111 C>T   | p.P37P   | SILENT   |
| MA4_23R | Chr6 | 35262346  | G | A | 0.132075472 | ZNF76    | ENST00000373953_r73 | c.1608 G>A  | p.Q536Q  | SILENT   |
| MA4_23R | Chr6 | 41754576  | C | T | 0.202380952 | PRICKLE4 | ENST00000335515_r73 | c.864 C>T   | p.L288L  | SILENT   |
| MA4_23R | Chr6 | 42072274  | C | T | 0.193548387 | C6orf132 | ENST00000341865_r73 | c.3376 G>A  | p.A1126T | MISSENSE |
| MA4_23R | Chr6 | 51889823  | G | A | 0.191358025 | PKHD1    | ENST00000371117_r73 | c.4785 C>T  | p.G1595G | SILENT   |
| MA4_23R | Chr6 | 54804720  | C | T | 0.223776224 | FAM83B   | ENST00000306858_r73 | c.951 C>T   | p.S317S  | SILENT   |
| MA4_23R | Chr6 | 84871572  | G | A | 0.24137931  | KIAA1009 | ENST00000403245_r73 | c.2569 C>T  | p.R857C  | MISSENSE |
| MA4_23R | Chr6 | 109764598 | A | T | 0.2734375   | SMPD2    | ENST00000258052_r73 | c.858 A>T   | p.P286P  | SILENT   |
| MA4_23R | Chr6 | 126080448 | T | C | 0.136363636 | HEY2     | ENST00000368364_r73 | c.514 T>C   | p.S172P  | MISSENSE |
| MA4_23R | Chr6 | 131919806 | G | A | 0.174757282 | MED23    | ENST00000354577_r73 | c.2334 C>T  | p.N778N  | SILENT   |
| MA4_23R | Chr6 | 137479526 | G | A | 0.220779221 | IL22RA2  | ENST00000349184_r73 | c.155 C>T   | p.A52V   | MISSENSE |
| MA4_23R | Chr6 | 142539730 | G | A | 0.197802198 | VTA1     | ENST00000367630_r73 | c.874 G>A   | p.V292I  | MISSENSE |
| MA4_23R | Chr6 | 154481128 | C | T | 0.2         | IPCEF1   | ENST00000265198_r73 | c.1149 G>A  | p.P383P  | SILENT   |
| MA4_23R | Chr7 | 4722377   | G | A | 0.36        | FOXK1    | ENST00000328914_r73 | c.438 G>A   | p.R146R  | SILENT   |
| MA4_23R | Chr7 | 4824597   | C | T | 0.219512195 | AP5Z1    | ENST00000348624_r73 | c.849 C>T   | p.A283A  | SILENT   |
| MA4_23R | Chr7 | 5434174   | C | G | 0.166666667 | TNRC18   | ENST00000430969_r73 | c.240 G>C   | p.S80S   | SILENT   |
| MA4_23R | Chr7 | 21893969  | G | C | 0.259615385 | DNAH11   | ENST00000409508_r73 | c.11098 G>C | p.E3700Q | MISSENSE |
| MA4_23R | Chr7 | 26192248  | G | A | 0.390243902 | NFE2L3   | ENST00000056233_r73 | c.130 G>A   | p.D44N   | MISSENSE |
| MA4_23R | Chr7 | 26224382  | C | T | 0.066371681 | NFE2L3   | ENST00000056233_r73 | c.1064 C>T  | p.T355I  | MISSENSE |
| MA4_23R | Chr7 | 47409029  | G | A | 0.261904762 | TNS3     | ENST00000311160_r73 | c.1214 C>T  | p.T405M  | MISSENSE |
| MA4_23R | Chr7 | 48314389  | T | C | 0.266666667 | ABCA13   | ENST00000435803_r73 | c.5126 T>C  | p.L1709P | MISSENSE |
| MA4_23R | Chr7 | 100356262 | G | C | 0.142857143 | ZAN      | ENST00000349350_r73 | c.3560 G>C  | p.G1187A | MISSENSE |

Sheet1

|         |      |           |   |   |             |              |                     |             |          |          |
|---------|------|-----------|---|---|-------------|--------------|---------------------|-------------|----------|----------|
| MA4_23R | Chr7 | 100643477 | A | C | 0.074829932 | MUC12        | ENST00000536621_r73 | c.9633 A>C  | p.S3211S | SILENT   |
| MA4_23R | Chr7 | 100645731 | G | A | 0.111111111 | MUC12        | ENST00000536621_r73 | c.11887 G>A | p.E3963K | MISSENSE |
| MA4_23R | Chr7 | 100855576 | G | A | 0.171428571 | PLOD3        | ENST00000223127_r73 | c.1085 C>T  | p.P362L  | MISSENSE |
| MA4_23R | Chr7 | 117243823 | C | T | 0.167567568 | CFTR         | ENST00000003084_r73 | c.2895 C>T  | p.N965N  | SILENT   |
| MA4_23R | Chr7 | 121944279 | G | A | 0.159624413 | FEZF1        | ENST00000442488_r73 | c.213 C>T   | p.I71I   | SILENT   |
| MA4_23R | Chr7 | 139257887 | C | T | 0.163265306 | HIPK2        | ENST00000406875_r73 | c.3383 G>A  | p.R1128H | MISSENSE |
| MA4_23R | Chr7 | 140287517 | G | A | 0.189873418 | DENND2A      | ENST00000275884_r73 | c.1059 C>T  | p.Y353Y  | SILENT   |
| MA4_23R | Chr7 | 148904547 | A | G | 0.14516129  | ZNF282       | ENST00000262085_r73 | c.817 A>G   | p.M273V  | MISSENSE |
| MA4_23R | Chr7 | 150713295 | G | C | 0.17948718  | ATG9B        | ENST00000377974_r73 | c.2546 C>G  | p.P849R  | MISSENSE |
| MA4_23R | Chr7 | 150716160 | T | C | 0.158878505 | ATG9B        | ENST00000377974_r73 | c.1265 A>G  | p.Y422C  | MISSENSE |
| MA4_23R | Chr8 | 8185328   | C | T | 0.220183486 | SGK223       | ENST00000520004_r73 | c.2964 G>A  | p.S988S  | SILENT   |
| MA4_23R | Chr8 | 8235510   | G | C | 0.151898734 | SGK223       | ENST00000520004_r73 | c.409 C>G   | p.R137G  | MISSENSE |
| MA4_23R | Chr8 | 8560176   | G | A | 0.212121212 | CLDN23       | ENST00000519106_r73 | c.268 G>A   | p.A90T   | MISSENSE |
| MA4_23R | Chr8 | 9009379   | G | A | 0.25        | RP11-10A14.4 | ENST00000518496_r73 | c.21 G>A    | p.K7K    | SILENT   |
| MA4_23R | Chr8 | 11659451  | G | C | 0.428571429 | RP11-297N6.4 | ENST00000533405_r73 | c.146 C>G   | p.A49G   | MISSENSE |
| MA4_23R | Chr8 | 12957678  | C | T | 0.174863388 | DLC1         | ENST00000276297_r73 | c.2168 G>A  | p.R723H  | MISSENSE |
| MA4_23R | Chr8 | 22548277  | C | T | 0.137931035 | EGR3         | ENST00000317216_r73 | c.873 G>A   | p.E291E  | SILENT   |
| MA4_23R | Chr8 | 28671031  | A | C | 0.189393939 | INTS9        | ENST00000521022_r73 | c.587 T>G   | p.L196R  | MISSENSE |
| MA4_23R | Chr8 | 28929820  | A | C | 0.17948718  | KIF13B       | ENST00000524189_r73 | c.4535 T>G  | p.M1512R | MISSENSE |
| MA4_23R | Chr8 | 68028331  | C | T | 0.269662921 | CSPP1        | ENST00000262210_r73 | c.1455 C>T  | p.S485S  | SILENT   |
| MA4_23R | Chr8 | 98656775  | C | T | 0.225806452 | MTDH         | ENST00000336273_r73 | c.41 C>T    | p.A14V   | MISSENSE |
| MA4_23R | Chr8 | 103372358 | G | A | 0.181818182 | UBR5         | ENST00000520539_r73 | c.327 C>T   | p.D109D  | SILENT   |
| MA4_23R | Chr8 | 110302077 | A | T | 0.183206107 | NUDCD1       | ENST00000239690_r73 | c.726 T>A   | p.N242K  | MISSENSE |
| MA4_23R | Chr8 | 126052103 | T | C | 0.242105263 | KIAA0196     | ENST00000318410_r73 | c.2888 A>G  | p.N963S  | MISSENSE |
| MA4_23R | Chr8 | 144332046 | G | A | 0.107142857 | ZFP41        | ENST00000520584_r73 | c.33 G>A    | p.T11T   | SILENT   |
| MA4_23R | Chr8 | 144332046 | G | A | 0.107142857 | ZFP41        | ENST00000522452_r73 | c.33 G>A    | p.T11T   | SILENT   |
| MA4_23R | Chr8 | 144810572 | G | A | 0.150684932 | FAM83H       | ENST00000388913_r73 | c.1059 C>T  | p.A353A  | SILENT   |
| MA4_23R | Chr8 | 145748360 | G | C | 0.195402299 | LRRC24       | ENST00000529415_r73 | c.1041 C>G  | p.A347A  | SILENT   |
| MA4_23R | Chr9 | 6012864   | C | T | 0.073033708 | RANBP6       | ENST00000259569_r73 | c.2744 G>A  | p.R915Q  | MISSENSE |
| MA4_23R | Chr9 | 19409094  | G | C | 0.191489362 | ACER2        | ENST00000340967_r73 | c.12 G>C    | p.P4P    | SILENT   |
| MA4_23R | Chr9 | 34690000  | C | T | 0.166666667 | CCL19        | ENST00000311925_r73 | c.203 G>A   | p.R68H   | MISSENSE |
| MA4_23R | Chr9 | 34993437  | G | A | 0.178571429 | DNAJB5       | ENST00000453597_r73 | c.549 G>A   | p.E183E  | SILENT   |
| MA4_23R | Chr9 | 79635269  | C | T | 0.410958904 | FOXB2        | ENST00000376708_r73 | c.699 C>T   | p.A233A  | SILENT   |
| MA4_23R | Chr9 | 95177598  | T | C | 0.140625    | OMD          | ENST00000375550_r73 | c.1102 A>G  | p.T368A  | MISSENSE |
| MA4_23R | Chr9 | 96860820  | G | A | 0.152777778 | PTPDC1       | ENST00000375360_r73 | c.1810 G>A  | p.V604I  | MISSENSE |
| MA4_23R | Chr9 | 100112770 | C | T | 0.186046512 | CCDC180      | ENST00000529487_r73 | c.3067 C>T  | p.R1023W | MISSENSE |
| MA4_23R | Chr9 | 121930252 | C | T | 0.308411215 | DBC1         | ENST00000265922_r73 | c.1396 G>A  | p.V466M  | MISSENSE |

Sheet1

|         |      |           |   |   |             |         |                     |            |          |          |
|---------|------|-----------|---|---|-------------|---------|---------------------|------------|----------|----------|
| MA4_23R | Chr9 | 125486542 | A | G | 0.123167155 | OR1L4   | ENST00000259466_r73 | c.274 A>G  | p.I92V   | MISSENSE |
| MA4_23R | Chr9 | 131768786 | G | A | 0.154929578 | NUP188  | ENST00000372577_r73 | c.5079 G>A | p.T1693T | SILENT   |
| MA4_23R | Chr9 | 137711997 | G | A | 0.171974522 | COL5A1  | ENST00000371817_r73 | c.4482 G>A | p.P1494P | SILENT   |
| MA4_23R | Chr9 | 139636334 | G | A | 0.166666667 | LCN10   | ENST00000497771_r73 | c.256 C>T  | p.R86W   | MISSENSE |
| MA4_23R | Chr9 | 139935576 | C | T | 0.175675676 | NPDC1   | ENST00000371601_r73 | c.323 G>A  | p.R108Q  | MISSENSE |
| MA4_23R | ChrX | 2777948   | A | T | 0.186813187 | GYG2    | ENST00000398806_r73 | c.679 A>T  | p.N227Y  | MISSENSE |
| MA4_23R | ChrX | 2825403   | A | G | 0.175572519 | ARSD    | ENST00000381154_r73 | c.1691 T>C | p.M564T  | MISSENSE |
| MA4_23R | ChrX | 2836037   | G | C | 0.223684211 | ARSD    | ENST00000381154_r73 | c.671 C>G  | p.S224C  | MISSENSE |
| MA4_23R | ChrX | 2951348   | A | G | 0.4         | ARSH    | ENST00000381130_r73 | c.1611 A>G | p.P537P  | SILENT   |
| MA4_23R | ChrX | 3002687   | A | G | 0.382978723 | ARSF    | ENST00000381127_r73 | c.810 A>G  | p.E270E  | SILENT   |
| MA4_23R | ChrX | 3228411   | G | A | 0.755555556 | MXRA5   | ENST00000217939_r73 | c.7833 C>T | p.A2611A | SILENT   |
| MA4_23R | ChrX | 3228891   | A | G | 0.471428571 | MXRA5   | ENST00000217939_r73 | c.7353 T>C | p.T2451T | SILENT   |
| MA4_23R | ChrX | 3235724   | C | T | 0.727272727 | MXRA5   | ENST00000217939_r73 | c.5998 G>A | p.G2000S | MISSENSE |
| MA4_23R | ChrX | 3239545   | C | T | 0.523809524 | MXRA5   | ENST00000217939_r73 | c.4181 G>A | p.G1394D | MISSENSE |
| MA4_23R | ChrX | 3240343   | G | A | 0.546875    | MXRA5   | ENST00000217939_r73 | c.3383 C>T | p.A1128V | MISSENSE |
| MA4_23R | ChrX | 3241050   | G | A | 0.642857143 | MXRA5   | ENST00000217939_r73 | c.2676 C>T | p.S892S  | SILENT   |
| MA4_23R | ChrX | 3241256   | T | C | 0.338235294 | MXRA5   | ENST00000217939_r73 | c.2470 A>G | p.I824V  | MISSENSE |
| MA4_23R | ChrX | 3241317   | T | C | 0.37704918  | MXRA5   | ENST00000217939_r73 | c.2409 A>G | p.P803P  | SILENT   |
| MA4_23R | ChrX | 3241791   | G | A | 0.471698113 | MXRA5   | ENST00000217939_r73 | c.1935 C>T | p.D645D  | SILENT   |
| MA4_23R | ChrX | 3592725   | G | A | 0.492753623 | PRKX    | ENST00000262848_r73 | c.249 C>T  | p.P83P   | SILENT   |
| MA4_23R | ChrX | 3631167   | A | G | 0.45945946  | PRKX    | ENST00000262848_r73 | c.128 T>C  | p.V43A   | MISSENSE |
| MA4_23R | ChrX | 7889828   | C | T | 0.306122449 | PNPLA4  | ENST00000381042_r73 | c.337 G>A  | p.V113I  | MISSENSE |
| MA4_23R | ChrX | 10180554  | G | A | 0.333333333 | CLCN4   | ENST00000380833_r73 | c.1437 G>A | p.A479A  | SILENT   |
| MA4_23R | ChrX | 12937513  | C | T | 0.253424658 | TLR8    | ENST00000218032_r73 | c.354 C>T  | p.D118D  | SILENT   |
| MA4_23R | ChrX | 16168467  | T | C | 0.647058824 | GRPR    | ENST00000380289_r73 | c.453 T>C  | p.S151S  | SILENT   |
| MA4_23R | ChrX | 16627756  | C | T | 0.346153846 | CTPS2   | ENST00000359276_r73 | c.1599 G>A | p.P533P  | SILENT   |
| MA4_23R | ChrX | 16859628  | G | A | 0.517241379 | TXLNG   | ENST00000380122_r73 | c.1326 G>A | p.Q442Q  | SILENT   |
| MA4_23R | ChrX | 21508666  | A | G | 0.193277311 | CNKSR2  | ENST00000279451_r73 | c.651 A>G  | p.Q217Q  | SILENT   |
| MA4_23R | ChrX | 21861434  | A | G | 0.28        | MBTPS2  | ENST00000379484_r73 | c.222 A>G  | p.Q74Q   | SILENT   |
| MA4_23R | ChrX | 23019346  | G | T | 0.339285714 | DDX53   | ENST00000327968_r73 | c.1172 G>T | p.R391M  | MISSENSE |
| MA4_23R | ChrX | 23933852  | G | A | 0.3125      | CXorf58 | ENST00000379211_r73 | c.252 G>A  | p.V84V   | SILENT   |
| MA4_23R | ChrX | 24608284  | A | G | 0.223880597 | PCYT1B  | ENST00000379145_r73 | c.288 T>C  | p.S96S   | SILENT   |
| MA4_23R | ChrX | 26157792  | C | T | 0.560606061 | MAGEB18 | ENST00000325250_r73 | c.690 C>T  | p.A230A  | SILENT   |
| MA4_23R | ChrX | 27999146  | C | T | 0.302013423 | DCAF8L1 | ENST00000441525_r73 | c.306 G>A  | p.E102E  | SILENT   |
| MA4_23R | ChrX | 30254361  | G | A | 0.375       | MAGEB3  | ENST00000378986_r73 | c.320 G>A  | p.R107H  | MISSENSE |
| MA4_23R | ChrX | 30254530  | A | G | 0.186440678 | MAGEB3  | ENST00000378986_r73 | c.489 A>G  | p.V163V  | SILENT   |
| MA4_23R | ChrX | 30326983  | C | T | 0.328767123 | NR0B1   | ENST00000378970_r73 | c.498 G>A  | p.R166R  | SILENT   |

Sheet1

|         |      |          |   |   |             |         |                     |        |     |          |          |
|---------|------|----------|---|---|-------------|---------|---------------------|--------|-----|----------|----------|
| MA4_23R | ChrX | 31496426 | T | C | 0.234848485 | DMD     | ENST00000378677_r73 | c.8722 | A>G | p.N2908D | MISSENSE |
| MA4_23R | ChrX | 31496431 | T | A | 0.2421875   | DMD     | ENST00000378677_r73 | c.8717 | A>T | p.E2906V | MISSENSE |
| MA4_23R | ChrX | 31697636 | A | G | 0.27972028  | DMD     | ENST00000378677_r73 | c.7716 | T>C | p.N2572N | SILENT   |
| MA4_23R | ChrX | 31893307 | T | G | 0.310344828 | DMD     | ENST00000378677_r73 | c.7084 | A>C | p.K2362Q | MISSENSE |
| MA4_23R | ChrX | 32235149 | G | A | 0.222222222 | DMD     | ENST00000378677_r73 | c.6310 | C>T | p.R2104C | MISSENSE |
| MA4_23R | ChrX | 32380996 | C | T | 0.330275229 | DMD     | ENST00000378677_r73 | c.5222 | G>A | p.R1741H | MISSENSE |
| MA4_23R | ChrX | 35988996 | T | C | 0.4         | CXorf22 | ENST00000297866_r73 | c.1926 | T>C | p.L642L  | SILENT   |
| MA4_23R | ChrX | 35993454 | C | T | 0.612903226 | CXorf22 | ENST00000297866_r73 | c.2445 | C>T | p.D815D  | SILENT   |
| MA4_23R | ChrX | 36007464 | A | T | 0.333333333 | CXorf22 | ENST00000297866_r73 | c.2742 | A>T | p.E914D  | MISSENSE |
| MA4_23R | ChrX | 36368166 | G | A | 0.304347826 | CXorf30 | ENST00000378657_r73 | c.955  | G>A | p.D319N  | MISSENSE |
| MA4_23R | ChrX | 36371719 | T | A | 0.479591837 | CXorf30 | ENST00000378657_r73 | c.1112 | T>A | p.F371Y  | MISSENSE |
| MA4_23R | ChrX | 36385156 | A | G | 0.216374269 | CXorf30 | ENST00000378657_r73 | c.1437 | A>G | p.E479E  | SILENT   |
| MA4_23R | ChrX | 37028127 | A | G | 0.322580645 | FAM47C  | ENST00000358047_r73 | c.1644 | A>G | p.P548P  | SILENT   |
| MA4_23R | ChrX | 37029254 | A | C | 0.323076923 | FAM47C  | ENST00000358047_r73 | c.2771 | A>C | p.N924T  | MISSENSE |
| MA4_23R | ChrX | 39932907 | T | C | 0.201438849 | BCOR    | ENST00000397354_r73 | c.1692 | A>G | p.A564A  | SILENT   |
| MA4_23R | ChrX | 40513785 | C | T | 0.183673469 | MED14   | ENST00000324817_r73 | c.4122 | G>A | p.S1374S | SILENT   |
| MA4_23R | ChrX | 40573157 | G | A | 0.296875    | MED14   | ENST00000324817_r73 | c.525  | C>T | p.D175D  | SILENT   |
| MA4_23R | ChrX | 43603391 | T | C | 0.606060606 | MAOA    | ENST00000338702_r73 | c.1410 | T>C | p.D470D  | SILENT   |
| MA4_23R | ChrX | 44401295 | T | G | 0.119047619 | FUNDC1  | ENST00000378045_r73 | c.81   | A>C | p.A27A   | SILENT   |
| MA4_23R | ChrX | 47343254 | C | T | 0.284482759 | CXorf24 | ENST00000357412_r73 | c.251  | C>T | p.T84I   | MISSENSE |
| MA4_23R | ChrX | 47444985 | T | C | 0.351851852 | TIMP1   | ENST00000218388_r73 | c.372  | T>C | p.F124F  | SILENT   |
| MA4_23R | ChrX | 47483800 | G | A | 0.327272727 | CFP     | ENST00000396992_r73 | c.1284 | C>T | p.N428N  | SILENT   |
| MA4_23R | ChrX | 47918205 | G | A | 0.666666667 | ZNF630  | ENST00000409324_r73 | c.1626 | C>T | p.P542P  | SILENT   |
| MA4_23R | ChrX | 48418126 | A | G | 0.271186441 | TBC1D25 | ENST00000376771_r73 | c.830  | A>G | p.N277S  | MISSENSE |
| MA4_23R | ChrX | 48418659 | G | A | 0.377192983 | TBC1D25 | ENST00000376771_r73 | c.1363 | G>A | p.A455T  | MISSENSE |
| MA4_23R | ChrX | 48751289 | G | A | 0.394736842 | TIMM17B | ENST00000376582_r73 | c.324  | C>T | p.G108G  | SILENT   |
| MA4_23R | ChrX | 48888074 | T | C | 0.538461539 | TFE3    | ENST00000315869_r73 | c.1323 | A>G | p.V441V  | SILENT   |
| MA4_23R | ChrX | 53457622 | T | C | 0.176470588 | RIBC1   | ENST00000375327_r73 | c.942  | T>C | p.T314T  | SILENT   |
| MA4_23R | ChrX | 54836361 | A | G | 0.2         | MAGED2  | ENST00000375068_r73 | c.252  | A>G | p.S84S   | SILENT   |
| MA4_23R | ChrX | 54836505 | A | G | 0.188235294 | MAGED2  | ENST00000375068_r73 | c.396  | A>G | p.T132T  | SILENT   |
| MA4_23R | ChrX | 54838077 | C | T | 0.23255814  | MAGED2  | ENST00000375068_r73 | c.981  | C>T | p.S327S  | SILENT   |
| MA4_23R | ChrX | 67937976 | G | A | 0.295081967 | STARD8  | ENST00000374599_r73 | c.1220 | G>A | p.R407Q  | MISSENSE |
| MA4_23R | ChrX | 68381912 | G | A | 0.493670886 | PJA1    | ENST00000374583_r73 | c.1170 | C>T | p.G390G  | SILENT   |
| MA4_23R | ChrX | 70597546 | C | G | 0.204081633 | TAF1    | ENST00000373790_r73 | c.805  | C>G | p.L269V  | MISSENSE |
| MA4_23R | ChrX | 70787856 | T | C | 0.268965517 | OGT     | ENST00000373719_r73 | c.2856 | T>C | p.A952A  | SILENT   |
| MA4_23R | ChrX | 71350133 | T | G | 0.279411765 | RGAG4   | ENST00000479991_r73 | c.1258 | A>C | p.S420R  | MISSENSE |
| MA4_23R | ChrX | 71360204 | A | G | 0.242424242 | NHSL2   | ENST00000373677_r73 | c.1708 | A>G | p.R570G  | MISSENSE |

Sheet1

|         |      |           |   |   |             |          |                     |            |          |          |
|---------|------|-----------|---|---|-------------|----------|---------------------|------------|----------|----------|
| MA4_23R | ChrX | 73524557  | A | G | 0.333333333 | ZCCHC13  | ENST00000339534_r73 | c.456 A>G  | p.L152L  | SILENT   |
| MA4_23R | ChrX | 77913569  | G | A | 0.292134832 | ZCCHC5   | ENST00000321110_r73 | c.349 C>T  | p.P117S  | MISSENSE |
| MA4_23R | ChrX | 78216024  | A | C | 0.22        | P2RY10   | ENST00000171757_r73 | c.7 A>C    | p.N3H    | MISSENSE |
| MA4_23R | ChrX | 79281202  | G | A | 0.368421053 | TBX22    | ENST00000373296_r73 | c.559 G>A  | p.E187K  | MISSENSE |
| MA4_23R | ChrX | 83723541  | A | G | 0.283018868 | HDX      | ENST00000297977_r73 | c.1190 T>C | p.F397S  | MISSENSE |
| MA4_23R | ChrX | 85219021  | T | C | 0.174757282 | CHM      | ENST00000357749_r73 | c.351 A>G  | p.A117A  | SILENT   |
| MA4_23R | ChrX | 86887244  | C | T | 0.25        | KLHL4    | ENST00000373119_r73 | c.1359 C>T | p.T453T  | SILENT   |
| MA4_23R | ChrX | 88008807  | G | A | 0.285714286 | CPXCR1   | ENST00000276127_r73 | c.392 G>A  | p.R131H  | MISSENSE |
| MA4_23R | ChrX | 89177673  | G | A | 0.279069767 | TGIF2LX  | ENST00000283891_r73 | c.589 G>A  | p.V197I  | MISSENSE |
| MA4_23R | ChrX | 99890204  | C | T | 0.295454546 | TSPAN6   | ENST00000373020_r73 | c.322 G>A  | p.A108T  | MISSENSE |
| MA4_23R | ChrX | 100749588 | A | C | 0.325       | ARMCX4   | ENST00000423738_r73 | c.6012 A>C | p.Q2004H | MISSENSE |
| MA4_23R | ChrX | 100808222 | C | T | 0.214876033 | ARMCX1   | ENST00000372829_r73 | c.309 C>T  | p.G103G  | SILENT   |
| MA4_23R | ChrX | 103042882 | T | C | 0.263157895 | PLP1     | ENST00000303958_r73 | c.609 T>C  | p.D203D  | SILENT   |
| MA4_23R | ChrX | 103294760 | C | T | 0.462686567 | H2BFM    | ENST00000355016_r73 | c.217 C>T  | p.Q73*   | NONSENSE |
| MA4_23R | ChrX | 104992963 | T | C | 0.26984127  | IL1RAPL2 | ENST00000372582_r73 | c.1059 T>C | p.Y353Y  | SILENT   |
| MA4_23R | ChrX | 105152282 | G | A | 0.333333333 | NRK      | ENST00000243300_r73 | c.1072 G>A | p.V358M  | MISSENSE |
| MA4_23R | ChrX | 105449445 | T | A | 0.284210526 | MUM1L1   | ENST00000357175_r73 | c.20 T>A   | p.L7Q    | MISSENSE |
| MA4_23R | ChrX | 105449709 | G | A | 0.324786325 | MUM1L1   | ENST00000357175_r73 | c.284 G>A  | p.G95D   | MISSENSE |
| MA4_23R | ChrX | 111698613 | T | C | 0.279411765 | ZCCHC16  | ENST00000340433_r73 | c.657 T>C  | p.H219H  | SILENT   |
| MA4_23R | ChrX | 111914244 | A | G | 0.272727273 | LHFPL1   | ENST00000371968_r73 | c.375 T>C  | p.F125F  | SILENT   |
| MA4_23R | ChrX | 114398338 | T | G | 0.213333333 | LRCH2    | ENST00000317135_r73 | c.1364 A>C | p.K455T  | MISSENSE |
| MA4_23R | ChrX | 114541176 | G | A | 0.5         | LUZP4    | ENST00000371920_r73 | c.749 G>A  | p.R250K  | MISSENSE |
| MA4_23R | ChrX | 117528142 | C | T | 0.26056338  | WDR44    | ENST00000254029_r73 | c.951 C>T  | p.T317T  | SILENT   |
| MA4_23R | ChrX | 118108785 | T | C | 0.225806452 | LONRF3   | ENST00000365713_r73 | c.42 T>C   | p.A14A   | SILENT   |
| MA4_23R | ChrX | 118587003 | C | T | 0.206666667 | SLC25A43 | ENST00000217909_r73 | c.1001 C>T | p.P334L  | MISSENSE |
| MA4_23R | ChrX | 118604436 | T | C | 0.565217391 | SLC25A5  | ENST00000317881_r73 | c.699 T>C  | p.T233T  | SILENT   |
| MA4_23R | ChrX | 118678364 | G | A | 0.454545455 | CXorf56  | ENST00000486230_r73 | c.375 C>T  | p.G125G  | SILENT   |
| MA4_23R | ChrX | 122537277 | T | C | 0.571428571 | GRIA3    | ENST00000371251_r73 | c.1200 T>C | p.N400N  | SILENT   |
| MA4_23R | ChrX | 123034511 | A | C | 0.5         | XIAP     | ENST00000371199_r73 | c.1268 A>C | p.Q423P  | MISSENSE |
| MA4_23R | ChrX | 123540315 | G | T | 0.75        | TENM1    | ENST00000371130_r73 | c.4986 C>A | p.T1662T | SILENT   |
| MA4_23R | ChrX | 125954964 | C | G | 0.172413793 | CXorf64  | ENST00000371125_r73 | c.343 C>G  | p.L115V  | MISSENSE |
| MA4_23R | ChrX | 128880614 | T | C | 0.529411765 | XPNPEP2  | ENST00000371106_r73 | c.447 T>C  | p.P149P  | SILENT   |
| MA4_23R | ChrX | 129201179 | C | T | 0.152542373 | ELF4     | ENST00000335997_r73 | c.1509 G>A | p.T503T  | SILENT   |
| MA4_23R | ChrX | 129283520 | A | G | 0.222222222 | AIFM1    | ENST00000416073_r73 | c.273 T>C  | p.D91D   | SILENT   |
| MA4_23R | ChrX | 129349295 | T | G | 0.265306122 | ZNF280C  | ENST00000370978_r73 | c.1851 A>C | p.G617G  | SILENT   |
| MA4_23R | ChrX | 129518646 | A | G | 0.244897959 | GPR119   | ENST00000276218_r73 | c.776 T>C  | p.V259A  | MISSENSE |
| MA4_23R | ChrX | 130408745 | G | A | 0.273972603 | IGSF1    | ENST00000370910_r73 | c.3552 C>T | p.V1184V | SILENT   |

Sheet1

|         |      |           |   |   |             |          |                     |        |     |          |          |
|---------|------|-----------|---|---|-------------|----------|---------------------|--------|-----|----------|----------|
| MA4_23R | ChrX | 130409217 | C | G | 0.333333333 | IGSF1    | ENST00000370910_r73 | c.3201 | G>C | p.M1067I | MISSENSE |
| MA4_23R | ChrX | 131212512 | A | G | 0.288288288 | FRMD7    | ENST00000298542_r73 | c.1533 | T>C | p.I511I  | SILENT   |
| MA4_23R | ChrX | 131212944 | A | G | 0.236111111 | FRMD7    | ENST00000298542_r73 | c.1101 | T>C | p.N367N  | SILENT   |
| MA4_23R | ChrX | 132161159 | G | A | 0.212389381 | USP26    | ENST00000370832_r73 | c.1090 | C>T | p.L364F  | MISSENSE |
| MA4_23R | ChrX | 132161673 | C | T | 0.253164557 | USP26    | ENST00000370832_r73 | c.576  | G>A | p.E192E  | SILENT   |
| MA4_23R | ChrX | 133963268 | C | T | 0.251968504 | FAM122C  | ENST00000370785_r73 | c.202  | C>T | p.P68S   | MISSENSE |
| MA4_23R | ChrX | 134185997 | T | A | 0.405405405 | FAM127B  | ENST00000370775_r73 | c.142  | A>T | p.S48C   | MISSENSE |
| MA4_23R | ChrX | 134990000 | C | T | 0.283333333 | SAGE1    | ENST00000370709_r73 | c.1159 | C>T | p.H387Y  | MISSENSE |
| MA4_23R | ChrX | 134991078 | A | G | 0.20625     | SAGE1    | ENST00000370709_r73 | c.1497 | A>G | p.Q499Q  | SILENT   |
| MA4_23R | ChrX | 134994005 | T | C | 0.35483871  | SAGE1    | ENST00000370709_r73 | c.2414 | T>C | p.L805S  | MISSENSE |
| MA4_23R | ChrX | 135426693 | A | G | 0.189655172 | GPR112   | ENST00000394143_r73 | c.828  | A>G | p.I276M  | MISSENSE |
| MA4_23R | ChrX | 135431236 | T | C | 0.297435897 | GPR112   | ENST00000394143_r73 | c.5371 | T>C | p.F1791L | MISSENSE |
| MA4_23R | ChrX | 135431358 | C | T | 0.277777778 | GPR112   | ENST00000394143_r73 | c.5493 | C>T | p.P1831P | SILENT   |
| MA4_23R | ChrX | 135480126 | T | C | 0.37037037  | GPR112   | ENST00000394143_r73 | c.8271 | T>C | p.F2757F | SILENT   |
| MA4_23R | ChrX | 135496398 | G | A | 0.26519337  | GPR112   | ENST00000394143_r73 | c.9117 | G>A | p.T3039T | SILENT   |
| MA4_23R | ChrX | 138679712 | T | A | 0.17948718  | MCF2     | ENST00000520602_r73 | c.2142 | A>T | p.G714G  | SILENT   |
| MA4_23R | ChrX | 142795225 | G | A | 0.230769231 | SPANXN2  | ENST00000370498_r73 | c.453  | C>T | p.D151D  | SILENT   |
| MA4_23R | ChrX | 149013097 | G | A | 0.173913044 | MAGEA8   | ENST00000286482_r73 | c.51   | G>A | p.Q17Q   | SILENT   |
| MA4_23R | ChrX | 149680554 | C | T | 0.289156627 | MAMLD1   | ENST00000432680_r73 | c.2208 | C>T | p.S736S  | SILENT   |
| MA4_23R | ChrX | 150348610 | C | T | 0.220183486 | GPR50    | ENST00000218316_r73 | c.555  | C>T | p.N185N  | SILENT   |
| MA4_23R | ChrX | 150817094 | C | G | 0.242105263 | PASD1    | ENST00000370357_r73 | c.637  | C>G | p.Q213E  | MISSENSE |
| MA4_23R | ChrX | 150840916 | C | T | 0.510638298 | PASD1    | ENST00000370357_r73 | c.1699 | C>T | p.L567L  | SILENT   |
| MA4_23R | ChrX | 150911107 | G | A | 0.375       | CNGA2    | ENST00000329903_r73 | c.582  | G>A | p.L194L  | SILENT   |
| MA4_23R | ChrX | 151092220 | A | G | 0.242424242 | MAGEA4   | ENST00000370340_r73 | c.84   | A>G | p.A28A   | SILENT   |
| MA4_23R | ChrX | 151899913 | T | C | 0.227722772 | MAGEA12  | ENST00000357916_r73 | c.888  | A>G | p.G296G  | SILENT   |
| MA4_23R | ChrX | 152106638 | C | T | 0.230769231 | ZNF185   | ENST00000370268_r73 | c.1139 | C>T | p.S380F  | MISSENSE |
| MA4_23R | ChrX | 152751497 | G | A | 0.3         | U82695.9 | ENST00000428676_r73 | c.140  | G>A | p.R47H   | MISSENSE |
| MA4_23R | ChrX | 153039502 | G | C | 0.304347826 | PLXNB3   | ENST00000361971_r73 | c.3468 | G>C | p.E1156D | MISSENSE |
| MA4_23R | ChrX | 153041544 | T | C | 0.186046512 | PLXNB3   | ENST00000361971_r73 | c.4604 | T>C | p.M1535T | MISSENSE |
| MA4_23R | ChrX | 153046686 | C | T | 0.1875      | SRPK3    | ENST00000370104_r73 | c.75   | C>T | p.C25C   | SILENT   |
| MA4_23R | ChrX | 153070999 | G | A | 0.28125     | PDZD4    | ENST00000164640_r73 | c.612  | C>T | p.N204N  | SILENT   |
| MA4_23R | ChrX | 153132228 | G | A | 0.276923077 | L1CAM    | ENST00000370060_r73 | c.2307 | C>T | p.S769S  | SILENT   |
| MA4_23R | ChrX | 153172059 | C | T | 0.212962963 | AVPR2    | ENST00000358927_r73 | c.993  | C>T | p.S331S  | SILENT   |
| MA4_23R | ChrX | 153421912 | T | C | 0.216216216 | OPN1LW   | ENST00000369951_r73 | c.888  | T>C | p.G296G  | SILENT   |
| MA4_23R | ChrX | 153540977 | A | G | 0.25        | TKTL1    | ENST00000369915_r73 | c.717  | A>G | p.E239E  | SILENT   |
| MA4_23R | ChrX | 153581932 | A | G | 0.36        | FLNA     | ENST00000360319_r73 | c.5826 | T>C | p.A1942A | SILENT   |
| MA4_23R | ChrX | 153667176 | T | C | 0.271186441 | GDI1     | ENST00000447750_r73 | c.219  | T>C | p.N73N   | SILENT   |

Sheet1

|         |       |           |           |        |             |          |                     |                       |               |                  |
|---------|-------|-----------|-----------|--------|-------------|----------|---------------------|-----------------------|---------------|------------------|
| MA4_23R | ChrX  | 153760953 | C         | T      | 0.298850575 | G6PD     | ENST00000393562_r73 | c.1206 G>A            | p.Q402Q       | SILENT           |
| MA4_23R | ChrX  | 153880569 | A         | G      | 0.363636364 | CTAG2    | ENST00000247306_r73 | c.606 T>C             | p.N202N       | SILENT           |
| MA4_23R | ChrX  | 153880634 | C         | G      | 0.391304348 | CTAG2    | ENST00000247306_r73 | c.541 G>C             | p.G181R       | MISSENSE         |
| MA4_23R | ChrX  | 153880830 | A         | C      | 0.297709924 | CTAG2    | ENST00000247306_r73 | c.345 T>G             | p.P115P       | SILENT           |
| MA4_23R | ChrX  | 153881525 | G         | C      | 0.267441861 | CTAG2    | ENST00000247306_r73 | c.265 C>G             | p.Q89E        | MISSENSE         |
| MA4_23R | Chr11 | 209895    | CCC       | -      | 0.107142857 | RIC8A    | ENST00000325207_r73 | c.621 CCC>-           | p.N207 NP>N   | MISSENSE         |
| MA4_23R | Chr11 | 17352478  | ACA       | -      | 0.166666667 | NUCB2    | ENST00000529010_r73 | c.1203 ACA>-          | p.L401 LQ>L   | MISSENSE         |
| MA4_23R | Chr11 | 4592707   | -         | AC     | 0.151162791 | C11orf40 | ENST00000307616_r73 | c.600 ->GT            | p.C200fs*12   | FRAMESHIFT       |
| MA4_23R | Chr11 | 5172796   | -         | C      | 0.192592593 | OR52A1   | ENST00000380367_r73 | c.804 ->G             | p.G268fs*14   | FRAMESHIFT       |
| MA4_23R | Chr11 | 71850157  | -         | TA     | 0.112033195 | FOLR3    | ENST00000542161_r73 | c.313 ->TA            | p.*105fs*73   | FRAMESHIFT       |
| MA4_23R | Chr11 | 73020376  | -         | CTC    | 0.125       | ARHGEF17 | ENST00000263674_r73 | c.693 ->CTC           | p.C231 C>CS   | MISSENSE         |
| MA4_23R | Chr11 | 94153333  | -         | ATC    | 0.142857143 | MRE11A   | ENST00000323929_r73 | c.2085 ->GAT          | p.D695 D>EI   | MISSENSE         |
| MA4_23R | Chr7  | 137612914 | TGG       | -      | 0.4375      | CREB3L2  | ENST00000330387_r73 | c.299 CCA>-           | p.T100 TS>S   | MISSENSE         |
| MA4_23R | Chr7  | 12391269  | -         | A      | 0.2         | VWDE     | ENST00000275358_r73 | c.3816 ->T            | p.N1272fs*2   | FRAMESHIFT       |
| MA4_23R | Chr17 | 38858135  | A         | -      | 0.180851064 | KRT24    | ENST00000264651_r73 | c.666 T>-             | p.N222fs*11   | FRAMESHIFT       |
| MA4_23R | Chr17 | 72957963  | T         | -      | 0.3125      | HID1     | ENST00000425042_r73 | Exon 6 + 5 A>-        | -             | ESSENTIAL_SPLICE |
| MA4_23R | Chr17 | 79219501  | ATG       | -      | 0.260273973 | SLC38A10 | ENST00000374759_r73 | c.3213 CAT>-          | p.I1071 I >I  | MISSENSE         |
| MA4_23R | Chr2  | 3749152   | GAA       | -      | 0.176470588 | ALLC     | ENST00000252505_r73 | c.901 GAA>-           | p.E301Del(E)  | MISSENSE         |
| MA4_23R | Chr2  | 112843593 | TTGATAT   | -      | 0.222222222 | TMEM87B  | ENST00000283206_r73 | c.850 TTGATAT>-       | p.L284fs*4    | FRAMESHIFT       |
| MA4_23R | Chr2  | 238244864 | GCA       | -      | 0.171052632 | COL6A3   | ENST00000295550_r73 | c.8877 TGC>-          | p.A2959 AA>A  | MISSENSE         |
| MA4_23R | Chr2  | 71801335  | -         | AGGCGG | 0.109090909 | DYSF     | ENST00000409762_r73 | c.3233 ->AGGCGG       | p.Q1078 Q>QAE | MISSENSE         |
| MA4_23R | Chr2  | 170387133 | -         | T      | 0.181818182 | FASTKD1  | ENST00000453153_r73 | c.2406 ->A            | p.K802fs*18   | FRAMESHIFT       |
| MA4_23R | Chr2  | 172967129 | -         | GCT    | 0.122222222 | DLX2     | ENST00000234198_r73 | c.138 ->AGC           | p.S46 S>RA    | MISSENSE         |
| MA4_23R | Chr2  | 234113397 | -         | TG     | 0.181818182 | INPP5D   | ENST00000491070_r73 | c.110 ->TG            | p.I37fs*90    | FRAMESHIFT       |
| MA4_23R | Chr2  | 234429740 | -         | TTC    | 0.271186441 | USP40    | ENST00000450966_r73 | c.2255 ->GAA          | p.K752 K>RK   | MISSENSE         |
| MA4_23R | Chr22 | 38119755  | CAA       | -      | 0.157894737 | TRIOBP   | ENST00000406386_r73 | c.1192 CAA>-          | p.Q398Del(Q)  | MISSENSE         |
| MA4_23R | Chr22 | 36587846  | -         | CT     | 0.120171674 | APOL4    | ENST00000404685_r73 | c.331 ->AG            | p.V111fs*242  | FRAMESHIFT       |
| MA4_23R | Chr1  | 9304979   | CCCAGGCA  | -      | 0.178571429 | H6PD     | ENST00000377403_r73 | Exon 2 - 5 CCCAGGCA>- | -             | ESSENTIAL_SPLICE |
| MA4_23R | Chr1  | 36643701  | AGA       | -      | 0.333333333 | MAP7D1   | ENST00000373151_r73 | c.1607 AGA>-          | p.E536 EK>E   | MISSENSE         |
| MA4_23R | Chr1  | 45974801  | CCCGCC    | -      | 0.158273381 | MMACHC   | ENST00000401061_r73 | c.763 CCCGCC>-        | p.P255Del(PA) | MISSENSE         |
| MA4_23R | Chr1  | 153907279 | CTGCTGCTG | -      | 0.102040816 | DENND4B  | ENST00000361217_r73 | c.2722 CAGCAGCAG>-    | p.Q908Del(QQ) | MISSENSE         |
| MA4_23R | Chr1  | 154542837 | ACA       | -      | 0.145833333 | CHRN2    | ENST00000368476_r73 | c.359 ACA>-           | p.Y120 YN>Y   | MISSENSE         |
| MA4_23R | Chr1  | 156354348 | C         | -      | 0.184210526 | RHBG     | ENST00000368249_r73 | c.1265 C>-            | p.S422fs*38   | FRAMESHIFT       |
| MA4_23R | Chr1  | 206239432 | AAT       | -      | 0.183823529 | C1orf186 | ENST00000331555_r73 | c.464 ATT>-           | p.Y155 YF>F   | MISSENSE         |
| MA4_23R | Chr1  | 23966895  | -         | AAG    | 0.275362319 | MDS2     | ENST00000374555_r73 | c.279 ->AAG           | p.V93 V>VR    | MISSENSE         |
| MA4_23R | Chr1  | 85598680  | -         | A      | 0.110236221 | WDR63    | ENST00000294664_r73 | c.2675 ->A            | p.*892fs*1    | FRAMESHIFT       |
| MA4_23R | Chr1  | 153907279 | -         | CTG    | 0.102040816 | DENND4B  | ENST00000361217_r73 | c.2730 ->CAG          | p.Q910 Q>HR   | MISSENSE         |

Sheet1

|         |       |           |           |        |             |               |                     |                    |                |                  |
|---------|-------|-----------|-----------|--------|-------------|---------------|---------------------|--------------------|----------------|------------------|
| MA4_23R | Chr1  | 234744946 | -         | GCT    | 0.205882353 | IRF2BP2       | ENST00000366610_r73 | c.295 ->AGC        | p.L99Ins(S)    | MISSENSE         |
| MA4_23R | Chr1  | 248059780 | -         | A      | 0.136363636 | OR2W3         | ENST00000360358_r73 | c.892 ->A          | p.K298fs*19    | FRAMESHIFT       |
| MA4_23R | Chr18 | 60646248  | CAG       | -      | 0.129533679 | PHLPP1        | ENST00000262719_r73 | c.4738 CAG>-       | p.Q1580Del(Q)  | MISSENSE         |
| MA4_23R | Chr16 | 3406757   | T         | -      | 0.175257732 | OR2C1         | ENST00000304936_r73 | c.817 T>-          | p.F273fs*13    | FRAMESHIFT       |
| MA4_23R | Chr16 | 7760847   | AAA       | -      | 0.238095238 | RBFOX1        | ENST00000550418_r73 | Exon 16 + 5 AAA>-  | -              | ESSENTIAL_SPLICE |
| MA4_23R | Chr16 | 67859708  | AGG       | -      | 0.125       | TSNAXIP1      | ENST00000388833_r73 | c.791 AGG>-        | p.Q264 QE>Q    | MISSENSE         |
| MA4_23R | Chr16 | 336889    | -         | A      | 0.190476191 | PDIA2         | ENST00000219406_r73 | c.1477 ->A         | p.N493fs*64    | FRAMESHIFT       |
| MA4_23R | Chr13 | 61102576  | ATA       | -      | 0.133640553 | TDRD3         | ENST00000377894_r73 | c.938 ATA>-        | p.D313 DN>D    | MISSENSE         |
| MA4_23R | Chr13 | 77532065  | CAGAGGTAG | -      | 0.207317073 | IRG1          | ENST00000377462_r73 | c.1391 CAGAGGTAG>- | p.P464 PEVA>P  | MISSENSE         |
| MA4_23R | Chr6  | 168314998 | G         | -      | 0.108108108 | MLLT4         | ENST00000392108_r73 | Exon 16 + 5 G>-    | -              | ESSENTIAL_SPLICE |
| MA4_23R | ChrX  | 135474445 | GAT       | -      | 0.266666667 | GPR112        | ENST00000394143_r73 | c.7966 GAT>-       | p.D2656Del(D)  | MISSENSE         |
| MA4_23R | ChrX  | 36162685  | -         | TG     | 0.30952381  | GHDC2         | ENST00000378660_r73 | c.1268 ->TG        | p.L423fs*2     | FRAMESHIFT       |
| MA4_23R | ChrX  | 112022298 | -         | AGG    | 0.177777778 | AMOT          | ENST00000304758_r73 | c.1857 ->CCT       | p.P619 P>PL    | MISSENSE         |
| MA4_23R | Chr3  | 124482495 | TTGTTGAAC | -      | 0.144578313 | ITGB5         | ENST00000296181_r73 | c.2367 GTTCAACAA>- | p.K789 KFNK>K  | MISSENSE         |
| MA4_23R | Chr3  | 56650055  | -         | CTC    | 0.188679245 | CCDC66        | ENST00000394672_r73 | c.1817 ->CTC       | p.S606 S>SP    | MISSENSE         |
| MA4_23R | Chr3  | 122459291 | -         | AGA    | 0.111111111 | HSPBAP1       | ENST00000306103_r73 | c.1368 ->TCT       | p.P456 P>PL    | MISSENSE         |
| MA4_23R | Chr9  | 139235482 | C         | -      | 0.159090909 | GPSM1         | ENST00000392945_r73 | c.1239 C>-         | p.L413fs*57    | FRAMESHIFT       |
| MA4_23R | Chr9  | 80881428  | -         | GGG    | 0.153333333 | CEP78         | ENST00000415759_r73 | c.1871 ->GGG       | p.P624 P>RA    | MISSENSE         |
| MA4_23R | Chr9  | 125391771 | -         | A      | 0.255813954 | OR1B1         | ENST00000304833_r73 | c.44 ->T           | p.L15fs*9      | FRAMESHIFT       |
| MA4_23R | Chr12 | 27849503  | A         | -      | 0.2         | REP15         | ENST00000310791_r73 | c.8 A>-            | p.Q3fs*9       | FRAMESHIFT       |
| MA4_23R | Chr12 | 72070506  | GTT       | -      | 0.101449275 | THAP2         | ENST00000308086_r73 | c.305 GTT>-        | p.S102 SC>S    | MISSENSE         |
| MA4_23R | Chr12 | 2062324   | -         | TGC    | 0.104477612 | DCP1B         | ENST00000280665_r73 | c.782 ->GCA        | p.Q261 Q>RK    | MISSENSE         |
| MA4_23R | Chr20 | 25457050  | CTCCCA    | -      | 0.161764706 | NINL          | ENST00000278886_r73 | c.2872 TGGGAG>-    | p.W958Del(WE)  | MISSENSE         |
| MA4_23R | Chr14 | 94410276  | A         | -      | 0.32        | RP11-131H24.4 | ENST00000557646_r73 | c.167 A>-          | p.Q56fs*8      | FRAMESHIFT       |
| MA4_23R | Chr14 | 105352885 | GCAGGA    | -      | 0.215686275 | CEP170B       | ENST00000556508_r73 | c.2099 GCAGGA>-    | p.R700 RRS>R   | MISSENSE         |
| MA4_23R | Chr14 | 23548788  | -         | GTGAAT | 0.123076923 | ACIN1         | ENST00000262710_r73 | c.1930 ->ATTCAC    | p.R644Ins(IH)  | MISSENSE         |
| MA4_23R | Chr15 | 43579798  | C         | -      | 0.121827411 | TGM7          | ENST00000452443_r73 | c.628 G>-          | p.A210fs*17    | FRAMESHIFT       |
| MA4_23R | Chr15 | 41099900  | -         | GGGGC  | 0.153846154 | ZFYVE19       | ENST00000355341_r73 | c.113 ->GGGGC      | p.W38fs*73     | FRAMESHIFT       |
| MA4_23R | Chr8  | 75664695  | A         | -      | 0.143646409 | RP11-758M4.1  | ENST00000523442_r73 | c.248 A>-          | p.H83fs*24     | FRAMESHIFT       |
| MA4_23R | Chr8  | 145740367 | A         | -      | 0.111111111 | RECQL4        | ENST00000428558_r73 | c.1573 T>-         | p.C525fs*33    | FRAMESHIFT       |
| MA4_23R | Chr8  | 72755648  | -         | T      | 0.166666667 | RP11-383H13.1 | ENST00000537896_r73 | c.12 ->T           | p.T4fs*16      | FRAMESHIFT       |
| MA4_23R | Chr4  | 177106010 | TCTC      | -      | 0.158227848 | SPATA4        | ENST00000280191_r73 | c.836 GAGA>-       | p.R279fs*4     | FRAMESHIFT       |
| MA4_23R | Chr19 | 8389893   | TCC       | -      | 0.13592233  | KANK3         | ENST00000330915_r73 | c.2022 GGA>-       | p.E674 ED>D    | MISSENSE         |
| MA4_23R | Chr19 | 11558341  | GAG       | -      | 0.1875      | PRKCSH        | ENST00000591462_r73 | c.937 GAG>-        | p.E313Del(E)   | MISSENSE         |
| MA4_23R | Chr19 | 23927742  | CA        | -      | 0.119047619 | ZNF681        | ENST00000402377_r73 | c.609 TG>-         | p.C203fs*5     | FRAMESHIFT       |
| MA4_23R | Chr19 | 37879853  | TGTGCA    | -      | 0.125748503 | ZNF527        | ENST00000436120_r73 | c.902 TGTGCA>-     | p.P301 PYA>PYA | MISSENSE         |
| MA4_23R | Chr19 | 54973989  | CCT       | -      | 0.172413793 | LENG9         | ENST00000333834_r73 | c.785 AGG>-        | p.E262 EA>A    | MISSENSE         |



Sheet1

|         |       |           |      |           |             |               |                     |                 |               |            |
|---------|-------|-----------|------|-----------|-------------|---------------|---------------------|-----------------|---------------|------------|
| MA4_23R | Chr19 | 34263201  | -    | AGC       | 0.13        | CHST8         | ENST00000438847_r73 | c.508 ->AGC     | p.S170Ins(S)  | MISSENSE   |
| MA4_23R | Chr19 | 46265048  | -    | TCCAGC    | 0.128205128 | AC074212.3    | ENST00000457052_r73 | c.1357 ->TCCAGC | p.S453Ins(SS) | MISSENSE   |
| MA4_23R | Chr19 | 55790887  | -    | GCCGCCGCC | 0.112359551 | HSPBP1        | ENST00000255631_r73 | c.90 ->GGCGCGCC | p.G30 G->GAAA | MISSENSE   |
| MA4_23R | Chr19 | 56244722  | -    | T         | 0.143884892 | NLRP9         | ENST00000332836_r73 | c.475 ->A       | p.T159fs*31   | FRAMESHIFT |
| MA4_23R | Chr10 | 21435341  | CACT | -         | 0.133640553 | C10orf113     | ENST00000534331_r73 | c.94 AGTG>-     | p.S32fs*5     | FRAMESHIFT |
| MA4_23R | Chr10 | 22498485  | -    | AGA       | 0.251231527 | EBLN1         | ENST00000422359_r73 | c.428 ->TCT     | p.L143 L>LL   | MISSENSE   |
| MA4_23R | Chr10 | 27702257  | -    | C         | 0.121052632 | PTCHD3        | ENST00000438700_r73 | c.923 ->G       | p.G308fs*27   | FRAMESHIFT |
| MA4_23R | Chr10 | 32740799  | -    | T         | 0.183486239 | CCDC7         | ENST00000277657_r73 | c.229 ->T       | p.L77fs*6     | FRAMESHIFT |
| MA4_23R | Chr5  | 7867478   | ATA  | -         | 0.147368421 | FASTKD3       | ENST00000264669_r73 | c.717 TAT>-     | p.I239 I>I    | MISSENSE   |
| MA4_23R | Chr5  | 74491716  | TCA  | -         | 0.14        | ANKRD31       | ENST00000506364_r73 | c.755 TGA>-     | p.M252 MN>N   | MISSENSE   |
| MA4_23R | Chr5  | 111755670 | G    | -         | 0.132653061 | FLJ11235      | ENST00000600409_r73 | c.376 G>-       | p.G126fs*173  | FRAMESHIFT |
| MA4_23R | Chr5  | 180687429 | TCT  | -         | 0.233502538 | TRIM52        | ENST00000327767_r73 | c.384 AGA>-     | p.E128 EE>E   | MISSENSE   |
| MA4_24  | Chr2  | 130832835 | C    | T         | 0.107142857 | POTEF         | ENST00000409914_r73 | c.2210 G>A      | p.R737H       | MISSENSE   |
| MA4_24  | Chr1  | 203134484 | G    | T         | 0.076923077 | ADORA1        | ENST00000309502_r73 | c.437 G>T       | p.W146L       | MISSENSE   |
| MA4_24  | Chr9  | 138377427 | C    | T         | 0.04787234  | PPP1R26       | ENST00000605286_r73 | c.1071 C>T      | p.S357S       | SILENT     |
| MA4_24  | Chr1  | 115258748 | C    | T         | 0.033224146 | NRAS          | ENST00000369535_r73 | c.34 G>A        | p.G12S        | MISSENSE   |
| MA4_24  | ChrX  | 100400133 | G    | C         | 0.022727273 | CENPI         | ENST00000372927_r73 | c.1646 G>C      | p.R549P       | MISSENSE   |
| MA4_24R | Chr21 | 22849652  | G    | A         | 0.30781759  | NCAM2         | ENST00000400546_r73 | c.1937 G>A      | p.G646E       | MISSENSE   |
| MA4_24R | Chr1  | 186014936 | G    | A         | 0.251021166 | HMCN1         | ENST00000271588_r73 | c.6421 G>A      | p.G2141S      | MISSENSE   |
| MA4_24R | Chr6  | 152420061 | A    | G         | 0.386363636 | ESR1          | ENST00000338799_r73 | c.1748 A>G      | p.Y583C       | MISSENSE   |
| MA4_24R | ChrX  | 100400133 | G    | C         | 0.52644041  | CENPI         | ENST00000372927_r73 | c.1646 G>C      | p.R549P       | MISSENSE   |
| MA4_24R | Chr14 | 64954616  | T    | A         | 0.31037692  | ZBTB25        | ENST00000261683_r73 | c.333 A>T       | p.A111A       | SILENT     |
| MA4_24R | Chr8  | 37702629  | C    | G         | 0.3010279   | BRF2          | ENST00000220659_r73 | c.639 G>C       | p.E213D       | MISSENSE   |
| MA4_24R | Chr9  | 126783462 | C    | T         | 0.231441048 | LHX2          | ENST00000373615_r73 | c.812 C>T       | p.T271M       | MISSENSE   |
| MA4_24R | Chr8  | 26240718  | G    | A         | 0.299591837 | BNIP3L        | ENST00000380629_r73 | c.72 G>A        | p.Q24Q        | SILENT     |
| MA4_24R | Chr12 | 53298699  | G    | A         | 0.277777778 | KRT8          | ENST00000552551_r73 | c.67 C>T        | p.R23C        | MISSENSE   |
| MA4_24R | ChrX  | 100745623 | G    | -         | 0.125       | ARMCX4        | ENST00000423738_r73 | c.2047 G>-      | p.D683fs*262  | FRAMESHIFT |
| MA4_25  | Chr22 | 31495066  | C    | T         | 0.181305399 | SMTN          | ENST00000358743_r73 | c.2352 C>T      | p.R784R       | SILENT     |
| MA4_25  | Chr12 | 25398284  | C    | T         | 0.182159147 | KRAS          | ENST00000311936_r73 | c.35 G>A        | p.G12D        | MISSENSE   |
| MA4_25  | Chr4  | 100574475 | G    | A         | 0.363435173 | RP11-766F14.2 | ENST00000511828_r73 | c.1331 C>T      | p.T444M       | MISSENSE   |
| MA4_25  | Chr5  | 176517475 | G    | A         | 0.785784993 | FGFR4         | ENST00000292408_r73 | c.176 G>A       | p.R59Q        | MISSENSE   |
| MA4_25  | Chr1  | 115258747 | C    | T         | 0.011875955 | NRAS          | ENST00000369535_r73 | c.35 G>A        | p.G12D        | MISSENSE   |
| MA4_25  | Chr1  | 115258748 | C    | T         | 0.03457938  | NRAS          | ENST00000369535_r73 | c.34 G>A        | p.G12S        | MISSENSE   |
| MA4_25  | Chr12 | 25398281  | C    | T         | 0.02281746  | KRAS          | ENST00000311936_r73 | c.38 G>A        | p.G13D        | MISSENSE   |
| MA9_02  | Chr8  | 142204230 | G    | A         | 0.138424043 | DENND3        | ENST00000262585_r73 | c.3495 G>A      | p.A1165A      | SILENT     |
| MA9_05  | Chr12 | 25378561  | G    | A         | 0.010122395 | KRAS          | ENST00000369535_r73 | c.35 G>A        | p.G12D        | MISSENSE   |
| MA9_05  | Chr3  | 78684959  | G    | A         | 0.013206336 | ROBO1         | ENST00000464233_r73 | c.3337 C>T      | p.Q1113*      | NONSENSE   |

Sheet1

|          |       |           |   |           |             |           |                     |                   |              |                  |
|----------|-------|-----------|---|-----------|-------------|-----------|---------------------|-------------------|--------------|------------------|
| MA9_05   | Chr3  | 165547388 | C | T         | 0.014514278 | BCHE      | ENST00000264381_r73 | c.1434 G>A        | p.L478L      | SILENT           |
| MA9_03   | Chr2  | 228563984 | G | A         | 0.048889717 | SLC19A3   | ENST00000425817_r73 | c.447 C>T         | p.A149A      | SILENT           |
| MA9_03   | Chr1  | 79002226  | C | T         | 0.105546838 | PTGFR     | ENST00000370758_r73 | c.934 C>T         | p.L312F      | MISSENSE         |
| MA9_03   | Chr12 | 25398281  | C | T         | 0.026697105 | KRAS      | ENST00000311936_r73 | c.38 G>A          | p.G13D       | MISSENSE         |
| MA9_04   | Chr2  | 189868770 | G | C         | 0.223776224 | COL3A1    | ENST00000304636_r73 | c.2724 G>C        | p.A908A      | SILENT           |
| MA9_04   | Chr12 | 104092949 | C | T         | 0.42753908  | STAB2     | ENST00000388887_r73 | c.3658 C>T        | p.R1220C     | MISSENSE         |
| MA9_04   | Chr8  | 113702206 | A | G         | 0.323759791 | CSMD3     | ENST00000343508_r73 | c.1926 T>C        | p.N642N      | SILENT           |
| MLLwt_01 | Chr17 | 7577094   | - | CCT       | 0.326332017 | TP53      | ENST00000269305_r73 | c.844 ->AGG       | p.R282Ins(R) | MISSENSE         |
| MLLwt_01 | Chr8  | 12595499  | C | T         | 0.444754464 | LONRF1    | ENST00000398246_r73 | Exon 4 5 G>A      | -            | ESSENTIAL_SPLICE |
| MLLwt_01 | Chr1  | 38341371  | G | A         | 0.417063492 | INPP5B    | ENST00000373024_r73 | c.1695 C>T        | p.D565D      | SILENT           |
| MLLwt_01 | Chr14 | 68270920  | G | A         | 0.439142317 | ZFYVE26   | ENST00000347230_r73 | c.1333 C>T        | p.L445F      | MISSENSE         |
| MLLwt_02 | Chr8  | 2820915   | C | T         | 0.692964304 | CSMD1     | ENST00000537824_r73 | c.9283 G>A        | p.V3095M     | MISSENSE         |
| MLLwt_02 | Chr9  | 5078360   | A | G         | 0.322690992 | JAK2      | ENST00000381652_r73 | c.2047 A>G        | p.R683G      | MISSENSE         |
| MLLwt_02 | Chr3  | 32933224  | G | A         | 0.391132723 | TRIM71    | ENST00000383763_r73 | c.2528 G>A        | p.R843H      | MISSENSE         |
| MLLwt_02 | Chr4  | 81865980  | G | A         | 0.251284104 | C4orf22   | ENST00000358105_r73 | c.493 G>A         | p.A165T      | MISSENSE         |
| MLLwt_02 | Chr9  | 139278036 | C | T         | 0.203371398 | SNAPC4    | ENST00000298532_r73 | c.1585 G>A        | p.G529S      | MISSENSE         |
| MLLwt_02 | Chr1  | 216462698 | G | T         | 0.180441281 | USH2A     | ENST00000307340_r73 | c.1895 C>A        | p.P632H      | MISSENSE         |
| MLLwt_03 | Chr9  | 95237025  | - | TCATCATCA | 0.026448196 | ASPN      | ENST00000375544_r73 | c.155 ->TGATGATGA | p.E52 E>VMMK | MISSENSE         |
| MLLwt_03 | Chr11 | 1266996   | T | C         | 0.258956916 | MUC5B     | ENST00000529681_r73 | c.8886 T>C        | p.R2962R     | SILENT           |
| MLLwt_03 | Chr12 | 112888162 | G | C         | 0.0860887   | PTPN11    | ENST00000392597_r73 | c.178 G>C         | p.G60R       | MISSENSE         |
| MLLwt_04 | Chr16 | 58076166  | G | A         | 0.055459184 | MMP15     | ENST00000219271_r73 | c.1196 G>A        | p.R399H      | MISSENSE         |
| MLLwt_05 | Chr3  | 10953794  | C | T         | 0.124726845 | SLC6A11   | ENST00000254488_r73 | c.911 C>T         | p.T304M      | MISSENSE         |
| MLLwt_06 | Chr7  | 4800821   | C | T         | 0.375       | FO XK1    | ENST00000328914_r73 | c.1823 C>T        | p.T608I      | MISSENSE         |
| MLLwt_06 | Chr6  | 20124710  | G | A         | 0.410250182 | MBOAT1    | ENST00000324607_r73 | c.836 C>T         | p.P279L      | MISSENSE         |
| MLLwt_06 | Chr6  | 27100393  | A | T         | 0.224532225 | HIST1H2BJ | ENST00000607124_r73 | c.137 T>A         | p.L46Q       | MISSENSE         |
| MLLwt_06 | Chr20 | 60791797  | C | G         | 0.422680412 | HRH3      | ENST00000340177_r73 | c.603 G>C         | p.T201T      | SILENT           |
| MLLwt_06 | Chr1  | 86289382  | G | T         | 0.303030303 | COL24A1   | ENST00000370571_r73 | c.3721 C>A        | p.Q1241K     | MISSENSE         |
| MLLwt_06 | Chr4  | 169433068 | G | C         | 0.095695971 | PALLD     | ENST00000261509_r73 | c.413 G>C         | p.R138P      | MISSENSE         |
| MLLwt_07 | Chr7  | 100643824 | C | T         | 0.044602273 | MUC12     | ENST00000536621_r73 | c.9980 C>T        | p.T3327M     | MISSENSE         |
| MLLwt_07 | Chr12 | 112230482 | G | A         | 0.312261781 | ALDH2     | ENST00000416293_r73 | c.838 G>A         | p.V280M      | MISSENSE         |
| MLLwt_08 | Chr16 | 737085    | C | T         | 0.379388448 | WDR24     | ENST00000293883_r73 | c.991 G>A         | p.A331T      | MISSENSE         |
| MLLwt_08 | Chr11 | 1017828   | G | A         | 0.083926755 | MUC6      | ENST00000421673_r73 | c.4973 C>T        | p.T1658M     | MISSENSE         |
| MLLwt_08 | Chr17 | 4643865   | C | T         | 0.346       | ZMYND15   | ENST00000433935_r73 | c.22 C>T          | p.R8W        | MISSENSE         |
| MLLwt_08 | Chr10 | 15719628  | G | A         | 0.388174807 | ITGA8     | ENST00000378076_r73 | c.639 C>T         | p.D213D      | SILENT           |
| MLLwt_08 | Chr6  | 38905788  | C | T         | 0.268558952 | DNAH8     | ENST00000449981_r73 | c.11602 C>T       | p.R3868*     | NONSENSE         |
| MLLwt_08 | Chr2  | 43452533  | - | AG        | 0.346       | ZFP36L2   | ENST00000282388_r73 | c.410 ->CT        | p.L137fs*51  | FRAMESHIFT       |
| MLLwt_08 | Chr20 | 62599293  | G | A         | 0.030521212 | ZNF512B   | ENST00000369888_r73 | c.11 C>T          | p.P4L        | MISSENSE         |

## Sheet1

|          |       |           |   |   |             |       |                     |            |         |          |
|----------|-------|-----------|---|---|-------------|-------|---------------------|------------|---------|----------|
| MLLwt_09 | Chr12 | 25398281  | C | T | 0.026697105 | KRAS  | ENST00000311936_r73 | c.38 G>A   | p.G13D  | MISSENSE |
| MLLwt_10 | Chr16 | 29830928  | G | A | 0.057032224 | PAGR1 | ENST00000320330_r73 | c.618 G>A  | p.S206S | SILENT   |
| MLLwt_10 | Chr1  | 156761566 | C | T | 0.178651281 | PRCC  | ENST00000271526_r73 | c.1161 C>T | p.S387S | SILENT   |

**Suppl. Table 5. Read counts per sample used for analysis of BCR repertoires.**

| Sample (RNA) | Total number of BCRs capture | Number of unique BCRs captured |
|--------------|------------------------------|--------------------------------|
| MA4_18       | 12795                        | 10328                          |
| MA4_18R      | 1583                         | 1213                           |
| MA4_20       | 13464                        | 8456                           |
| MA4_20R      | 29747                        | 25759                          |
| MA4_21       | 26731                        | 20934                          |
| MA4_21R      | 2620                         | 1784                           |
| MA4_22       | 13862                        | 9506                           |
| MA4_22R      | 46863                        | 38426                          |
| MA4_23       | 11129                        | 5217                           |
| MA4_23R      | 2543                         | 1777                           |
| MA4_24       | 17511                        | 9927                           |
| MA4_24R      | 24313                        | 18482                          |
| MA4_27       | 7157                         | 5232                           |
| MA4_27R      | 8129                         | 6112                           |

**Suppl. Table 6. Top 100 genes determining PC1 and PC2 separation in Figure 6C.****PC1:**

| Gene stable ID                  | Gene name                | Gene type      | Chromosome         |
|---------------------------------|--------------------------|----------------|--------------------|
| <a href="#">ENSG00000007062</a> | <a href="#">PROM1</a>    | protein_coding | <a href="#">4</a>  |
| <a href="#">ENSG00000011600</a> | <a href="#">TYROBP</a>   | protein_coding | <a href="#">19</a> |
| <a href="#">ENSG00000024526</a> | <a href="#">DEPDC1</a>   | protein_coding | <a href="#">1</a>  |
| <a href="#">ENSG00000030419</a> | <a href="#">IKZF2</a>    | protein_coding | <a href="#">2</a>  |
| <a href="#">ENSG00000035499</a> | <a href="#">DEPDC1B</a>  | protein_coding | <a href="#">5</a>  |
| <a href="#">ENSG00000066279</a> | <a href="#">ASPM</a>     | protein_coding | <a href="#">1</a>  |
| <a href="#">ENSG00000072571</a> | <a href="#">HMMR</a>     | protein_coding | <a href="#">5</a>  |
| <a href="#">ENSG00000075426</a> | <a href="#">FOSL2</a>    | protein_coding | <a href="#">2</a>  |
| <a href="#">ENSG00000077152</a> | <a href="#">UBE2T</a>    | protein_coding | <a href="#">1</a>  |
| <a href="#">ENSG00000087074</a> | <a href="#">PPP1R15A</a> | protein_coding | <a href="#">19</a> |
| <a href="#">ENSG00000090382</a> | <a href="#">LYZ</a>      | protein_coding | <a href="#">12</a> |
| <a href="#">ENSG00000092621</a> | <a href="#">PHGDH</a>    | protein_coding | <a href="#">1</a>  |
| <a href="#">ENSG00000100097</a> | <a href="#">LGALS1</a>   | protein_coding | <a href="#">22</a> |
| <a href="#">ENSG00000100721</a> | <a href="#">TCL1A</a>    | protein_coding | <a href="#">14</a> |
| <a href="#">ENSG00000101003</a> | <a href="#">GINS1</a>    | protein_coding | <a href="#">20</a> |
| <a href="#">ENSG00000102760</a> | <a href="#">RGCC</a>     | protein_coding | <a href="#">13</a> |
| <a href="#">ENSG00000105011</a> | <a href="#">ASF1B</a>    | protein_coding | <a href="#">19</a> |
| <a href="#">ENSG00000106004</a> | <a href="#">HOXA5</a>    | protein_coding | <a href="#">7</a>  |
| <a href="#">ENSG00000107447</a> | <a href="#">DNTT</a>     | protein_coding | <a href="#">10</a> |
| <a href="#">ENSG00000110777</a> | <a href="#">POU2AF1</a>  | protein_coding | <a href="#">11</a> |
| <a href="#">ENSG00000111247</a> | <a href="#">RAD51AP1</a> | protein_coding | <a href="#">12</a> |
| <a href="#">ENSG00000112984</a> | <a href="#">KIF20A</a>   | protein_coding | <a href="#">5</a>  |
| <a href="#">ENSG00000117399</a> | <a href="#">CDC20</a>    | protein_coding | <a href="#">1</a>  |
| <a href="#">ENSG00000117724</a> | <a href="#">CENPF</a>    | protein_coding | <a href="#">1</a>  |
| <a href="#">ENSG00000119138</a> | <a href="#">KLF9</a>     | protein_coding | <a href="#">9</a>  |
| <a href="#">ENSG00000119508</a> | <a href="#">NR4A3</a>    | protein_coding | <a href="#">9</a>  |
| <a href="#">ENSG00000123358</a> | <a href="#">NR4A1</a>    | protein_coding | <a href="#">12</a> |
| <a href="#">ENSG00000124785</a> | <a href="#">NRN1</a>     | protein_coding | <a href="#">6</a>  |
| <a href="#">ENSG00000125740</a> | <a href="#">FOSB</a>     | protein_coding | <a href="#">19</a> |
| <a href="#">ENSG00000125869</a> | <a href="#">LAMP5</a>    | protein_coding | <a href="#">20</a> |
| <a href="#">ENSG00000126787</a> | <a href="#">DLGAP5</a>   | protein_coding | <a href="#">14</a> |
| <a href="#">ENSG00000127528</a> | <a href="#">KLF2</a>     | protein_coding | <a href="#">19</a> |
| <a href="#">ENSG00000128218</a> | <a href="#">VPREB3</a>   | protein_coding | <a href="#">22</a> |
| <a href="#">ENSG00000128322</a> | <a href="#">IGLL1</a>    | protein_coding | <a href="#">22</a> |
| <a href="#">ENSG00000129173</a> | <a href="#">E2F8</a>     | protein_coding | <a href="#">11</a> |
| <a href="#">ENSG00000131016</a> | <a href="#">AKAP12</a>   | protein_coding | <a href="#">6</a>  |
| <a href="#">ENSG00000131747</a> | <a href="#">TOP2A</a>    | protein_coding | <a href="#">17</a> |
| <a href="#">ENSG00000132465</a> | <a href="#">JCHAIN</a>   | protein_coding | <a href="#">4</a>  |
| <a href="#">ENSG00000133101</a> | <a href="#">CCNA1</a>    | protein_coding | <a href="#">13</a> |
| <a href="#">ENSG00000135069</a> | <a href="#">PSAT1</a>    | protein_coding | <a href="#">9</a>  |
| <a href="#">ENSG00000135144</a> | <a href="#">DTX1</a>     | protein_coding | <a href="#">12</a> |
| <a href="#">ENSG00000135604</a> | <a href="#">STX11</a>    | protein_coding | <a href="#">6</a>  |
| <a href="#">ENSG00000136826</a> | <a href="#">KLF4</a>     | protein_coding | <a href="#">9</a>  |
| <a href="#">ENSG00000137804</a> | <a href="#">NUSAP1</a>   | protein_coding | <a href="#">15</a> |
| <a href="#">ENSG00000137812</a> | <a href="#">KNL1</a>     | protein_coding | <a href="#">15</a> |
| <a href="#">ENSG00000138160</a> | <a href="#">KIF11</a>    | protein_coding | <a href="#">10</a> |
| <a href="#">ENSG00000138180</a> | <a href="#">CEP55</a>    | protein_coding | <a href="#">10</a> |
| <a href="#">ENSG00000142178</a> | <a href="#">SIK1</a>     | protein_coding | <a href="#">21</a> |

|                                 |                            |                      |                    |
|---------------------------------|----------------------------|----------------------|--------------------|
| <a href="#">ENSG00000143228</a> | <a href="#">NUF2</a>       | protein_coding       | <a href="#">1</a>  |
| <a href="#">ENSG00000143507</a> | <a href="#">DUSP10</a>     | protein_coding       | <a href="#">1</a>  |
| <a href="#">ENSG00000148773</a> | <a href="#">MKI67</a>      | protein_coding       | <a href="#">10</a> |
| <a href="#">ENSG00000152253</a> | <a href="#">SPC25</a>      | protein_coding       | <a href="#">2</a>  |
| <a href="#">ENSG00000153234</a> | <a href="#">NR4A2</a>      | protein_coding       | <a href="#">2</a>  |
| <a href="#">ENSG00000156738</a> | <a href="#">MS4A1</a>      | protein_coding       | <a href="#">11</a> |
| <a href="#">ENSG00000157514</a> | <a href="#">TSC22D3</a>    | protein_coding       | <a href="#">X</a>  |
| <a href="#">ENSG00000161835</a> | <a href="#">GRASP</a>      | protein_coding       | <a href="#">12</a> |
| <a href="#">ENSG00000163808</a> | <a href="#">KIF15</a>      | protein_coding       | <a href="#">3</a>  |
| <a href="#">ENSG00000164929</a> | <a href="#">BAALC</a>      | protein_coding       | <a href="#">8</a>  |
| <a href="#">ENSG00000165030</a> | <a href="#">NFIL3</a>      | protein_coding       | <a href="#">9</a>  |
| <a href="#">ENSG00000166349</a> | <a href="#">RAG1</a>       | protein_coding       | <a href="#">11</a> |
| <a href="#">ENSG00000168078</a> | <a href="#">PBK</a>        | protein_coding       | <a href="#">8</a>  |
| <a href="#">ENSG00000169397</a> | <a href="#">RNASE3</a>     | protein_coding       | <a href="#">14</a> |
| <a href="#">ENSG00000169429</a> | <a href="#">CXCL8</a>      | protein_coding       | <a href="#">4</a>  |
| <a href="#">ENSG00000169575</a> | <a href="#">VPREB1</a>     | protein_coding       | <a href="#">22</a> |
| <a href="#">ENSG00000170293</a> | <a href="#">CMTM8</a>      | protein_coding       | <a href="#">3</a>  |
| <a href="#">ENSG00000170312</a> | <a href="#">CDK1</a>       | protein_coding       | <a href="#">10</a> |
| <a href="#">ENSG00000171246</a> | <a href="#">NPTX1</a>      | protein_coding       | <a href="#">17</a> |
| <a href="#">ENSG00000174123</a> | <a href="#">TLR10</a>      | protein_coding       | <a href="#">4</a>  |
| <a href="#">ENSG00000174500</a> | <a href="#">GCSAM</a>      | protein_coding       | <a href="#">3</a>  |
| <a href="#">ENSG00000175097</a> | <a href="#">RAG2</a>       | protein_coding       | <a href="#">11</a> |
| <a href="#">ENSG00000178999</a> | <a href="#">AURKB</a>      | protein_coding       | <a href="#">17</a> |
| <a href="#">ENSG00000185028</a> | <a href="#">LRRC14B</a>    | protein_coding       | <a href="#">5</a>  |
| <a href="#">ENSG00000185275</a> | <a href="#">CD24P4</a>     | processed_pseudogene | <a href="#">Y</a>  |
| <a href="#">ENSG00000188536</a> | <a href="#">HBA2</a>       | protein_coding       | <a href="#">16</a> |
| <a href="#">ENSG00000189057</a> | <a href="#">FAM111B</a>    | protein_coding       | <a href="#">11</a> |
| <a href="#">ENSG00000189283</a> | <a href="#">FHIT</a>       | protein_coding       | <a href="#">3</a>  |
| <a href="#">ENSG00000196549</a> | <a href="#">MME</a>        | protein_coding       | <a href="#">3</a>  |
| <a href="#">ENSG00000197747</a> | <a href="#">S100A10</a>    | protein_coding       | <a href="#">1</a>  |
| <a href="#">ENSG00000199568</a> | <a href="#">RNU5A-1</a>    | snRNA                | <a href="#">15</a> |
| <a href="#">ENSG00000199899</a> | <a href="#">RF00019</a>    | misc_RNA             | <a href="#">12</a> |
| <a href="#">ENSG00000200169</a> | <a href="#">RNU5D-1</a>    | snRNA                | <a href="#">1</a>  |
| <a href="#">ENSG00000206047</a> | <a href="#">DEFA1</a>      | protein_coding       | <a href="#">8</a>  |
| <a href="#">ENSG00000206172</a> | <a href="#">HBA1</a>       | protein_coding       | <a href="#">16</a> |
| <a href="#">ENSG00000206828</a> | <a href="#">RF00003</a>    | snRNA                | <a href="#">1</a>  |
| <a href="#">ENSG00000211904</a> | <a href="#">IGHJ2</a>      | IG_J_gene            | <a href="#">14</a> |
| <a href="#">ENSG00000211905</a> | <a href="#">IGHJ1</a>      | IG_J_gene            | <a href="#">14</a> |
| <a href="#">ENSG00000211966</a> | <a href="#">IGHV5-51</a>   | IG_V_gene            | <a href="#">14</a> |
| <a href="#">ENSG00000211978</a> | <a href="#">IGHV5-78</a>   | IG_V_pseudogene      | <a href="#">14</a> |
| <a href="#">ENSG00000227507</a> | <a href="#">LTB</a>        | protein_coding       | <a href="#">6</a>  |
| <a href="#">ENSG00000230945</a> | <a href="#">LINC01507</a>  | lincRNA              | <a href="#">9</a>  |
| <a href="#">ENSG00000236597</a> | <a href="#">IGHD7-27</a>   | IG_D_gene            | <a href="#">14</a> |
| <a href="#">ENSG00000237547</a> | <a href="#">IGHJ2P</a>     | IG_J_pseudogene      | <a href="#">14</a> |
| <a href="#">ENSG00000242887</a> | <a href="#">IGHJ3</a>      | IG_J_gene            | <a href="#">14</a> |
| <a href="#">ENSG00000244734</a> | <a href="#">HBB</a>        | protein_coding       | <a href="#">11</a> |
| <a href="#">ENSG00000253983</a> | <a href="#">AC087627.1</a> | antisense            | <a href="#">8</a>  |
| <a href="#">ENSG00000261434</a> | <a href="#">AC021087.3</a> | sense_overlapping    | <a href="#">5</a>  |
| <a href="#">ENSG00000265929</a> | <a href="#">MIR5195</a>    | miRNA                | <a href="#">14</a> |
| <a href="#">ENSG00000270640</a> | <a href="#">AC104695.3</a> | sense_intronic       | <a href="#">2</a>  |
| <a href="#">ENSG00000272398</a> | <a href="#">CD24</a>       | protein_coding       | <a href="#">6</a>  |
| <a href="#">ENSG00000275993</a> | <a href="#">SIK1B</a>      | protein_coding       | <a href="#">21</a> |

**PC2:**

| Gene stable ID                  | Gene name                  | Gene type      | Chromosome         |
|---------------------------------|----------------------------|----------------|--------------------|
| <a href="#">ENSG00000117318</a> | <a href="#">ID3</a>        | protein_coding | <a href="#">1</a>  |
| <a href="#">ENSG00000119535</a> | <a href="#">CSF3R</a>      | protein_coding | <a href="#">1</a>  |
| <a href="#">ENSG00000133048</a> | <a href="#">CHI3L1</a>     | protein_coding | <a href="#">1</a>  |
| <a href="#">ENSG00000143546</a> | <a href="#">S100A8</a>     | protein_coding | <a href="#">1</a>  |
| <a href="#">ENSG00000150681</a> | <a href="#">RGS18</a>      | protein_coding | <a href="#">1</a>  |
| <a href="#">ENSG00000158825</a> | <a href="#">CDA</a>        | protein_coding | <a href="#">1</a>  |
| <a href="#">ENSG00000159339</a> | <a href="#">PADI4</a>      | protein_coding | <a href="#">1</a>  |
| <a href="#">ENSG00000162747</a> | <a href="#">FCGR3B</a>     | protein_coding | <a href="#">1</a>  |
| <a href="#">ENSG00000163154</a> | <a href="#">TNFAIP8L2</a>  | protein_coding | <a href="#">1</a>  |
| <a href="#">ENSG00000163220</a> | <a href="#">S100A9</a>     | protein_coding | <a href="#">1</a>  |
| <a href="#">ENSG00000163221</a> | <a href="#">S100A12</a>    | protein_coding | <a href="#">1</a>  |
| <a href="#">ENSG00000163563</a> | <a href="#">MND4</a>       | protein_coding | <a href="#">1</a>  |
| <a href="#">ENSG00000186891</a> | <a href="#">TNFRSF18</a>   | protein_coding | <a href="#">1</a>  |
| <a href="#">ENSG00000235492</a> | <a href="#">LINC01221</a>  | lincRNA        | <a href="#">1</a>  |
| <a href="#">ENSG00000275538</a> | <a href="#">RNVU1-19</a>   | snRNA          | <a href="#">1</a>  |
| <a href="#">ENSG00000158050</a> | <a href="#">DUSP2</a>      | protein_coding | <a href="#">2</a>  |
| <a href="#">ENSG00000188011</a> | <a href="#">RTP5</a>       | protein_coding | <a href="#">2</a>  |
| <a href="#">ENSG00000189292</a> | <a href="#">ALKAL2</a>     | protein_coding | <a href="#">2</a>  |
| <a href="#">ENSG00000204099</a> | <a href="#">NEU4</a>       | protein_coding | <a href="#">2</a>  |
| <a href="#">ENSG00000012223</a> | <a href="#">LTF</a>        | protein_coding | <a href="#">3</a>  |
| <a href="#">ENSG00000073792</a> | <a href="#">IGF2BP2</a>    | protein_coding | <a href="#">3</a>  |
| <a href="#">ENSG00000164047</a> | <a href="#">CAMP</a>       | protein_coding | <a href="#">3</a>  |
| <a href="#">ENSG00000168334</a> | <a href="#">XIRP1</a>      | protein_coding | <a href="#">3</a>  |
| <a href="#">ENSG00000274840</a> | <a href="#">AC132807.2</a> | lincRNA        | <a href="#">3</a>  |
| <a href="#">ENSG00000163993</a> | <a href="#">S100P</a>      | protein_coding | <a href="#">4</a>  |
| <a href="#">ENSG00000038427</a> | <a href="#">VCAN</a>       | protein_coding | <a href="#">5</a>  |
| <a href="#">ENSG00000072571</a> | <a href="#">HMMR</a>       | protein_coding | <a href="#">5</a>  |
| <a href="#">ENSG00000160883</a> | <a href="#">HK3</a>        | protein_coding | <a href="#">5</a>  |
| <a href="#">ENSG00000168671</a> | <a href="#">UGT3A2</a>     | protein_coding | <a href="#">5</a>  |
| <a href="#">ENSG00000182578</a> | <a href="#">CSF1R</a>      | protein_coding | <a href="#">5</a>  |
| <a href="#">ENSG00000096006</a> | <a href="#">CRISP3</a>     | protein_coding | <a href="#">6</a>  |
| <a href="#">ENSG00000112299</a> | <a href="#">VNN1</a>       | protein_coding | <a href="#">6</a>  |
| <a href="#">ENSG00000198719</a> | <a href="#">DLL1</a>       | protein_coding | <a href="#">6</a>  |
| <a href="#">ENSG00000232891</a> | <a href="#">AL450344.3</a> | sense_intronic | <a href="#">6</a>  |
| <a href="#">ENSG00000105967</a> | <a href="#">TFEC</a>       | protein_coding | <a href="#">7</a>  |
| <a href="#">ENSG00000211688</a> | <a href="#">TRGJP2</a>     | TR_J_gene      | <a href="#">7</a>  |
| <a href="#">ENSG00000164821</a> | <a href="#">DEFA4</a>      | protein_coding | <a href="#">8</a>  |
| <a href="#">ENSG00000165071</a> | <a href="#">TMEM71</a>     | protein_coding | <a href="#">8</a>  |
| <a href="#">ENSG00000206047</a> | <a href="#">DEFA1</a>      | protein_coding | <a href="#">8</a>  |
| <a href="#">ENSG00000239839</a> | <a href="#">DEFA3</a>      | protein_coding | <a href="#">8</a>  |
| <a href="#">ENSG00000240247</a> | <a href="#">DEFA1B</a>     | protein_coding | <a href="#">8</a>  |
| <a href="#">ENSG00000271938</a> | <a href="#">AC103724.4</a> | lincRNA        | <a href="#">8</a>  |
| <a href="#">ENSG00000119508</a> | <a href="#">NR4A3</a>      | protein_coding | <a href="#">9</a>  |
| <a href="#">ENSG00000148346</a> | <a href="#">LCN2</a>       | protein_coding | <a href="#">9</a>  |
| <a href="#">ENSG00000229314</a> | <a href="#">ORM1</a>       | protein_coding | <a href="#">9</a>  |
| <a href="#">ENSG00000266017</a> | <a href="#">MIR4477B</a>   | miRNA          | <a href="#">9</a>  |
| <a href="#">ENSG00000118113</a> | <a href="#">MMP8</a>       | protein_coding | <a href="#">11</a> |
| <a href="#">ENSG00000134827</a> | <a href="#">TCN1</a>       | protein_coding | <a href="#">11</a> |
| <a href="#">ENSG00000149516</a> | <a href="#">MS4A3</a>      | protein_coding | <a href="#">11</a> |
| <a href="#">ENSG00000156575</a> | <a href="#">PRG3</a>       | protein_coding | <a href="#">11</a> |
| <a href="#">ENSG00000184545</a> | <a href="#">DUSP8</a>      | protein_coding | <a href="#">11</a> |

|                                 |                            |                      |                    |
|---------------------------------|----------------------------|----------------------|--------------------|
| <a href="#">ENSG00000090382</a> | <a href="#">LYZ</a>        | protein_coding       | <a href="#">12</a> |
| <a href="#">ENSG00000121316</a> | <a href="#">PLBD1</a>      | protein_coding       | <a href="#">12</a> |
| <a href="#">ENSG00000123358</a> | <a href="#">NR4A1</a>      | protein_coding       | <a href="#">12</a> |
| <a href="#">ENSG00000123405</a> | <a href="#">NFE2</a>       | protein_coding       | <a href="#">12</a> |
| <a href="#">ENSG00000161835</a> | <a href="#">GRASP</a>      | protein_coding       | <a href="#">12</a> |
| <a href="#">ENSG00000257883</a> | <a href="#">AC125603.2</a> | lincRNA              | <a href="#">12</a> |
| <a href="#">ENSG00000102524</a> | <a href="#">TNFSF13B</a>   | protein_coding       | <a href="#">13</a> |
| <a href="#">ENSG00000102837</a> | <a href="#">OLFM4</a>      | protein_coding       | <a href="#">13</a> |
| <a href="#">ENSG00000122025</a> | <a href="#">FLT3</a>       | protein_coding       | <a href="#">13</a> |
| <a href="#">ENSG00000100439</a> | <a href="#">ABHD4</a>      | protein_coding       | <a href="#">14</a> |
| <a href="#">ENSG00000100448</a> | <a href="#">CTSG</a>       | protein_coding       | <a href="#">14</a> |
| <a href="#">ENSG00000100504</a> | <a href="#">PYGL</a>       | protein_coding       | <a href="#">14</a> |
| <a href="#">ENSG00000126787</a> | <a href="#">DLGAP5</a>     | protein_coding       | <a href="#">14</a> |
| <a href="#">ENSG00000136315</a> | <a href="#">AL355922.1</a> | lincRNA              | <a href="#">14</a> |
| <a href="#">ENSG00000169385</a> | <a href="#">RNASE2</a>     | protein_coding       | <a href="#">14</a> |
| <a href="#">ENSG00000169397</a> | <a href="#">RNASE3</a>     | protein_coding       | <a href="#">14</a> |
| <a href="#">ENSG00000169413</a> | <a href="#">RNASE6</a>     | protein_coding       | <a href="#">14</a> |
| <a href="#">ENSG00000104043</a> | <a href="#">ATP8B4</a>     | protein_coding       | <a href="#">15</a> |
| <a href="#">ENSG00000173546</a> | <a href="#">CSPG4</a>      | protein_coding       | <a href="#">15</a> |
| <a href="#">ENSG00000270789</a> | <a href="#">AC135983.5</a> | processed_pseudogene | <a href="#">15</a> |
| <a href="#">ENSG00000171724</a> | <a href="#">VAT1L</a>      | protein_coding       | <a href="#">16</a> |
| <a href="#">ENSG00000188536</a> | <a href="#">HBA2</a>       | protein_coding       | <a href="#">16</a> |
| <a href="#">ENSG00000206053</a> | <a href="#">JPT2</a>       | protein_coding       | <a href="#">16</a> |
| <a href="#">ENSG00000005381</a> | <a href="#">MPO</a>        | protein_coding       | <a href="#">17</a> |
| <a href="#">ENSG00000121053</a> | <a href="#">EPX</a>        | protein_coding       | <a href="#">17</a> |
| <a href="#">ENSG00000131747</a> | <a href="#">TOP2A</a>      | protein_coding       | <a href="#">17</a> |
| <a href="#">ENSG00000008438</a> | <a href="#">PGLYRP1</a>    | protein_coding       | <a href="#">19</a> |
| <a href="#">ENSG00000099860</a> | <a href="#">GADD45B</a>    | protein_coding       | <a href="#">19</a> |
| <a href="#">ENSG00000104918</a> | <a href="#">RETN</a>       | protein_coding       | <a href="#">19</a> |
| <a href="#">ENSG00000105205</a> | <a href="#">CLC</a>        | protein_coding       | <a href="#">19</a> |
| <a href="#">ENSG00000124469</a> | <a href="#">CEACAM8</a>    | protein_coding       | <a href="#">19</a> |
| <a href="#">ENSG00000125740</a> | <a href="#">FOSB</a>       | protein_coding       | <a href="#">19</a> |
| <a href="#">ENSG00000126266</a> | <a href="#">FFAR1</a>      | protein_coding       | <a href="#">19</a> |
| <a href="#">ENSG00000170909</a> | <a href="#">OSCAR</a>      | protein_coding       | <a href="#">19</a> |
| <a href="#">ENSG00000171051</a> | <a href="#">FPR1</a>       | protein_coding       | <a href="#">19</a> |
| <a href="#">ENSG00000172232</a> | <a href="#">AZU1</a>       | protein_coding       | <a href="#">19</a> |
| <a href="#">ENSG00000196415</a> | <a href="#">PRTN3</a>      | protein_coding       | <a href="#">19</a> |
| <a href="#">ENSG00000197561</a> | <a href="#">ELANE</a>      | protein_coding       | <a href="#">19</a> |
| <a href="#">ENSG00000087586</a> | <a href="#">AURKA</a>      | protein_coding       | <a href="#">20</a> |
| <a href="#">ENSG00000100985</a> | <a href="#">MMP9</a>       | protein_coding       | <a href="#">20</a> |
| <a href="#">ENSG00000101347</a> | <a href="#">SAMHD1</a>     | protein_coding       | <a href="#">20</a> |
| <a href="#">ENSG00000101425</a> | <a href="#">BPI</a>        | protein_coding       | <a href="#">20</a> |
| <a href="#">ENSG00000124107</a> | <a href="#">SLPI</a>       | protein_coding       | <a href="#">20</a> |
| <a href="#">ENSG00000125810</a> | <a href="#">CD93</a>       | protein_coding       | <a href="#">20</a> |
| <a href="#">ENSG00000125869</a> | <a href="#">LAMP5</a>      | protein_coding       | <a href="#">20</a> |
| <a href="#">ENSG00000225988</a> | <a href="#">LAMP5-AS1</a>  | antisense            | <a href="#">20</a> |
| <a href="#">ENSG00000165168</a> | <a href="#">CYBB</a>       | protein_coding       | <a href="#">X</a>  |
| <a href="#">ENSG00000274536</a> | <a href="#">AL034397.3</a> | antisense            | <a href="#">X</a>  |
| <a href="#">ENSG00000129824</a> | <a href="#">RPS4Y1</a>     | protein_coding       | <a href="#">Y</a>  |



## Supplementary Tables

|                                                                                                               |   |
|---------------------------------------------------------------------------------------------------------------|---|
| <b>Suppl. Table 1.</b> Clinical and genetic characteristics of the 42 iBCP-ALL used in the discovery cohort.. | 2 |
| <b>Suppl. Table 2.</b> Primers used for analysis of BCR repertoires. ....                                     | 3 |
| <b>Suppl. Table 4.</b> MLL translocation breakpoints.....                                                     | 4 |
| <b>Suppl. Table 5.</b> Read counts per sample used for analysis of BCR repertoires.....                       | 5 |
| <b>Suppl. Table 6.</b> Top 100 genes determining PC1 and PC2 separation in Figure 6C. ....                    | 6 |

**Suppl. Table 1. Clinical and genetic characteristics of the 42 iBCP-ALL used in the discovery cohort.** \* months #PB: Peripheral blood, BM: Bone marrow.

| Cases ID | Hospital | Age*   | Gender | MLLr    | Specimen# | % Blast | Relapse |
|----------|----------|--------|--------|---------|-----------|---------|---------|
| MA4_01   | Paris    | 6 m    | M      | MLL-AF4 | PB        | 90      | NO      |
| MA4_02   | Paris    | 12 m   | M      | MLL-AF4 | BM        | 92      | NO      |
| MA4_03   | Paris    | 5 m    | M      | MLL-AF4 | PB        | 96      | NO      |
| MA4_04   | Paris    | 7 m    | M      | MLL-AF4 | PB        | 99      | NO      |
| MA4_05   | Paris    | 4.5 m  | F      | MLL-AF4 | PB        | 93      | NO      |
| MA4_06   | Erasmus  | 6.4 m  | F      | MLL-AF4 | BM        | 90      | NO      |
| MA4_07   | Erasmus  | 3.1 m  | F      | MLL-AF4 | PB        | 92      | NO      |
| MA4_08   | Erasmus  | 2.5 m  | M      | MLL-AF4 | BM        | 97      | NO      |
| MA4_09   | Erasmus  | 8.7 m  | F      | MLL-AF4 | PB        | 90      | NO      |
| MA4_10   | Erasmus  | 10.3 m | F      | MLL-AF4 | PB        | 94      | NO      |
| MA4_11   | Erasmus  | 10.1 m | F      | MLL-AF4 | BM        | 98      | NO      |
| MA4_12   | Erasmus  | 8.8 m  | M      | MLL-AF4 | BM        | 94      | NO      |
| MA4_13   | Erasmus  | 3.6 m  | M      | MLL-AF4 | PB        | 97      | NO      |
| MA4_14   | Erasmus  | 0.1 m  | F      | MLL-AF4 | BM        | 96      | YES     |
| MA4_15   | Erasmus  | 4.2 m  | F      | MLL-AF4 | PB        | 92      | NO      |
| MA4_16   | Erasmus  | 6.5 m  | F      | MLL-AF4 | BM        | 92      | NO      |
| MA4_17   | Erasmus  | 5.6 m  | M      | MLL-AF4 | PB        | 94      | YES     |
| MA4_18   | Monza    | 6.3 m  | F      | MLL-AF4 | BM        | 99      | YES     |
| MA4_19   | Monza    | 2.5 m  | M      | MLL-AF4 | BM        | 88      | NO      |
| MA4_20   | Monza    | 4.2 m  | M      | MLL-AF4 | BM        | 100     | YES     |
| MA4_21   | Monza    | 6 m    | F      | MLL-AF4 | BM        | 98      | YES     |
| MA4_22   | Monza    | 8 m    | M      | MLL-AF4 | BM        | 98      | YES     |
| MA4_23   | Monza    | 7.5 m  | M      | MLL-AF4 | BM        | 87      | YES     |
| MA4_24   | Monza    | 0.8 m  | M      | MLL-AF4 | BM        | Unknown | YES     |
| MA4_25   | Monza    | 3.1 m  | M      | MLL-AF4 | BM        | 100     | NO      |
| MA4_26   | Erasmus  | 7.2 m  | M      | MLL-AF4 | PB        | 96      | NO      |
| MA4_27   | Erasmus  | 6.4 m  | M      | MLL-AF4 | BM        | 92      | YES     |
| MA9_01   | Erasmus  | 3 m    | F      | MLL-AF9 | PB        | 93      | NO      |
| MA9_02   | Erasmus  | 2.6 m  | F      | MLL-AF9 | PB        | 98      | NO      |
| MA9_03   | Erasmus  | 11.2 m | F      | MLL-AF9 | PB        | 90      | NO      |
| MA9_04   | Erasmus  | 11.4 m | F      | MLL-AF9 | BM        | 90      | NO      |
| MA9_05   | Erasmus  | 0.4 m  | F      | MLL-AF9 | PB        | 90      | NO      |
| MLLwt_01 | Erasmus  | 11.3 m | F      | MLLwt   | BM        | 93      | NO      |
| MLLwt_02 | Erasmus  | 11.3 m | M      | MLLwt   | BM        | 90      | NO      |
| MLLwt_03 | Erasmus  | 0.4 m  | F      | MLLwt   | PB        | 98      | NO      |
| MLLwt_04 | Erasmus  | 11.7 m | M      | MLLwt   | PB        | 93      | NO      |
| MLLwt_05 | Erasmus  | 3.3 m  | M      | MLLwt   | BM        | 98      | NO      |
| MLLwt_06 | Erasmus  | 9 m    | F      | MLLwt   | BM        | 97      | NO      |
| MLLwt_07 | Erasmus  | 7.4 m  | F      | MLLwt   | PB        | 99      | NO      |
| MLLwt_08 | Erasmus  | 8.5 m  | M      | MLLwt   | PB        | 94      | NO      |
| MLLwt_09 | Erasmus  | 11.7 m | M      | MLLwt   | BM        | 98      | NO      |
| MLLwt_10 | Erasmus  | 4.2 m  | M      | MLLwt   | PB        | 95      | NO      |

**Suppl. Table 2. Primers used for analysis of BCR repertoires.**

| Oligo Name           | Sequence 5' to 3'                                        |
|----------------------|----------------------------------------------------------|
| VH1-FR1-HUMAN_BIOMED | GGCCTCAGTGAAGGTCTCCTGCAAG                                |
| VH2-FR1_HUMAN_BIOMED | GTCTGGTCCTACGCTGGTGAAACCC                                |
| VH3-FR1_HUMAN_BIOMED | CTGGGGGGTCCCTGAGACTCTCCTG                                |
| VH4-FR1_HUMAN_BIOMED | CTTCGGAGACCCTGTCCCTCACCTG                                |
| VH5-FR1_HUMAN_BIOMED | CGGGGAGTCTCTGAAGATCTCCTGT                                |
| VH6-FR1_HUMAN_BIOMED | TCGCAGACCCTCTCACTCACCTGTG                                |
| BC_IgHJ_HUMAN_BIOMED | TGTCCAGCACGCTTCAGGCTNNNNTNNNNTNNNNCTTACCTGAGGAGACGGTGACC |
| CNU_S                | TGTCCAGCACGCTTCAGGCT                                     |

**Suppl. Table 4. MLL translocation breakpoints.**

Genomic breakpoints determined by WGS at the base pair level in the MLL-AF4 and MLL-AF9 translocations

| Cases ID | MLL exon/intron    | AF4 exon/intron         | Breakpoint                                                       |
|----------|--------------------|-------------------------|------------------------------------------------------------------|
| MA4_01   | Exon 10            | Intron 3                | *Chr4:88004655-Chr11:118355607                                   |
| MA4_03   | Intron 10          | Intron 3                | Chr11:118359080-Chr4:87975057<br>*Chr4:87975036-Chr11:118358981  |
| MA4_04   | Intron 10          | Intron 3                | Chr11:118358194-Chr4:87992124<br>*Chr4:87989772-Chr11:118358572  |
| MA4_08   | Intron 10          | Intron 3                | Chr11:118359048-Chr4: 87977078                                   |
| MA4_09   | Exon 8             | Intron 3                | Chr11:118353327-Chr4:87975144                                    |
| MA4_10   | Intron 8           | Intron 3                | Chr11:118355109-Chr4:87976002                                    |
| MA4_13   | Exon 9             | Before exon 1 (reverse) | *Chr4:87854734-Chr11:118354941                                   |
| MA4_15   | Intron 9           | Intron 3                | *Chr4:87995770-Chr11:118355672                                   |
| MA4_16   | Intron 8 (reverse) | Intron 3 (reverse)      | *Chr4:87974323-Chr11:118354668                                   |
| MA4_19   | Intron 10          | Intron 3                | Chr11:118358319-Chr4:87988309<br>*Chr4:87988383-Chr11:118358153  |
| MA4_21   | Intron 10          | Intron 3                | Chr11:118357172-Chr4:87997625                                    |
| MA4_22   | Exon 11            | Intron 4 (reverse)      | *Chr4:88010955-Chr11:118359356                                   |
| MA4_23   | Intron 8           | Intron 3                | Chr11: 118353991-Chr4:87998295<br>*Chr4:87998749-Chr11:118353750 |
| MA4_26   | Intron 10          | Intron 3                | *Chr4:87998602-Chr11:118359398                                   |

| Cases ID | MLL exon/intron | MLLT3 exon/intron  | Breakpoint                      |
|----------|-----------------|--------------------|---------------------------------|
| MA9_02   | Intron 9        | Intron 4           | Chr11:118355190-Chr9:20441134   |
| MA9_04   | Intron 10       | Intron 5 (reverse) | *Chr9:20369705-Chr11: 118355611 |
| MA9_05   | Intron 10       | Intron 5           | Chr11:118358294-Chr9:20403549   |

\* reverse

**Suppl. Table 5. Read counts per sample used for analysis of BCR repertoires.**

| Sample (RNA) | Total number of BCRs capture | Number of unique BCRs captured |
|--------------|------------------------------|--------------------------------|
| MA4_18       | 12795                        | 10328                          |
| MA4_18R      | 1583                         | 1213                           |
| MA4_20       | 13464                        | 8456                           |
| MA4_20R      | 29747                        | 25759                          |
| MA4_21       | 26731                        | 20934                          |
| MA4_21R      | 2620                         | 1784                           |
| MA4_22       | 13862                        | 9506                           |
| MA4_22R      | 46863                        | 38426                          |
| MA4_23       | 11129                        | 5217                           |
| MA4_23R      | 2543                         | 1777                           |
| MA4_24       | 17511                        | 9927                           |
| MA4_24R      | 24313                        | 18482                          |
| MA4_27       | 7157                         | 5232                           |
| MA4_27R      | 8129                         | 6112                           |

**Suppl. Table 6. Top 100 genes determining PC1 and PC2 separation in Figure 6C.****PC1:**

| Gene stable ID                  | Gene name                | Gene type      | Chromosome         |
|---------------------------------|--------------------------|----------------|--------------------|
| <a href="#">ENSG00000007062</a> | <a href="#">PROM1</a>    | protein_coding | <a href="#">4</a>  |
| <a href="#">ENSG00000011600</a> | <a href="#">TYROBP</a>   | protein_coding | <a href="#">19</a> |
| <a href="#">ENSG00000024526</a> | <a href="#">DEPDC1</a>   | protein_coding | <a href="#">1</a>  |
| <a href="#">ENSG00000030419</a> | <a href="#">IKZF2</a>    | protein_coding | <a href="#">2</a>  |
| <a href="#">ENSG00000035499</a> | <a href="#">DEPDC1B</a>  | protein_coding | <a href="#">5</a>  |
| <a href="#">ENSG00000066279</a> | <a href="#">ASPM</a>     | protein_coding | <a href="#">1</a>  |
| <a href="#">ENSG00000072571</a> | <a href="#">HMMR</a>     | protein_coding | <a href="#">5</a>  |
| <a href="#">ENSG00000075426</a> | <a href="#">FOSL2</a>    | protein_coding | <a href="#">2</a>  |
| <a href="#">ENSG00000077152</a> | <a href="#">UBE2T</a>    | protein_coding | <a href="#">1</a>  |
| <a href="#">ENSG00000087074</a> | <a href="#">PPP1R15A</a> | protein_coding | <a href="#">19</a> |
| <a href="#">ENSG00000090382</a> | <a href="#">LYZ</a>      | protein_coding | <a href="#">12</a> |
| <a href="#">ENSG00000092621</a> | <a href="#">PHGDH</a>    | protein_coding | <a href="#">1</a>  |
| <a href="#">ENSG00000100097</a> | <a href="#">LGALS1</a>   | protein_coding | <a href="#">22</a> |
| <a href="#">ENSG00000100721</a> | <a href="#">TCL1A</a>    | protein_coding | <a href="#">14</a> |
| <a href="#">ENSG00000101003</a> | <a href="#">GINS1</a>    | protein_coding | <a href="#">20</a> |
| <a href="#">ENSG00000102760</a> | <a href="#">RGCC</a>     | protein_coding | <a href="#">13</a> |
| <a href="#">ENSG00000105011</a> | <a href="#">ASF1B</a>    | protein_coding | <a href="#">19</a> |
| <a href="#">ENSG00000106004</a> | <a href="#">HOXA5</a>    | protein_coding | <a href="#">7</a>  |
| <a href="#">ENSG00000107447</a> | <a href="#">DNTT</a>     | protein_coding | <a href="#">10</a> |
| <a href="#">ENSG00000110777</a> | <a href="#">POU2AF1</a>  | protein_coding | <a href="#">11</a> |
| <a href="#">ENSG00000111247</a> | <a href="#">RAD51AP1</a> | protein_coding | <a href="#">12</a> |
| <a href="#">ENSG00000112984</a> | <a href="#">KIF20A</a>   | protein_coding | <a href="#">5</a>  |
| <a href="#">ENSG00000117399</a> | <a href="#">CDC20</a>    | protein_coding | <a href="#">1</a>  |
| <a href="#">ENSG00000117724</a> | <a href="#">CENPF</a>    | protein_coding | <a href="#">1</a>  |
| <a href="#">ENSG00000119138</a> | <a href="#">KLF9</a>     | protein_coding | <a href="#">9</a>  |
| <a href="#">ENSG00000119508</a> | <a href="#">NR4A3</a>    | protein_coding | <a href="#">9</a>  |
| <a href="#">ENSG00000123358</a> | <a href="#">NR4A1</a>    | protein_coding | <a href="#">12</a> |
| <a href="#">ENSG00000124785</a> | <a href="#">NRN1</a>     | protein_coding | <a href="#">6</a>  |
| <a href="#">ENSG00000125740</a> | <a href="#">FOSB</a>     | protein_coding | <a href="#">19</a> |
| <a href="#">ENSG00000125869</a> | <a href="#">LAMP5</a>    | protein_coding | <a href="#">20</a> |
| <a href="#">ENSG00000126787</a> | <a href="#">DLGAP5</a>   | protein_coding | <a href="#">14</a> |
| <a href="#">ENSG00000127528</a> | <a href="#">KLF2</a>     | protein_coding | <a href="#">19</a> |
| <a href="#">ENSG00000128218</a> | <a href="#">VPREB3</a>   | protein_coding | <a href="#">22</a> |
| <a href="#">ENSG00000128322</a> | <a href="#">IGLL1</a>    | protein_coding | <a href="#">22</a> |
| <a href="#">ENSG00000129173</a> | <a href="#">E2F8</a>     | protein_coding | <a href="#">11</a> |
| <a href="#">ENSG00000131016</a> | <a href="#">AKAP12</a>   | protein_coding | <a href="#">6</a>  |
| <a href="#">ENSG00000131747</a> | <a href="#">TOP2A</a>    | protein_coding | <a href="#">17</a> |
| <a href="#">ENSG00000132465</a> | <a href="#">JCHAIN</a>   | protein_coding | <a href="#">4</a>  |
| <a href="#">ENSG00000133101</a> | <a href="#">CCNA1</a>    | protein_coding | <a href="#">13</a> |
| <a href="#">ENSG00000135069</a> | <a href="#">PSAT1</a>    | protein_coding | <a href="#">9</a>  |
| <a href="#">ENSG00000135144</a> | <a href="#">DTX1</a>     | protein_coding | <a href="#">12</a> |
| <a href="#">ENSG00000135604</a> | <a href="#">STX11</a>    | protein_coding | <a href="#">6</a>  |
| <a href="#">ENSG00000136826</a> | <a href="#">KLF4</a>     | protein_coding | <a href="#">9</a>  |
| <a href="#">ENSG00000137804</a> | <a href="#">NUSAP1</a>   | protein_coding | <a href="#">15</a> |
| <a href="#">ENSG00000137812</a> | <a href="#">KNL1</a>     | protein_coding | <a href="#">15</a> |
| <a href="#">ENSG00000138160</a> | <a href="#">KIF11</a>    | protein_coding | <a href="#">10</a> |
| <a href="#">ENSG00000138180</a> | <a href="#">CEP55</a>    | protein_coding | <a href="#">10</a> |
| <a href="#">ENSG00000142178</a> | <a href="#">SIK1</a>     | protein_coding | <a href="#">21</a> |

|                                 |                            |                      |                    |
|---------------------------------|----------------------------|----------------------|--------------------|
| <a href="#">ENSG00000143228</a> | <a href="#">NUF2</a>       | protein_coding       | <a href="#">1</a>  |
| <a href="#">ENSG00000143507</a> | <a href="#">DUSP10</a>     | protein_coding       | <a href="#">1</a>  |
| <a href="#">ENSG00000148773</a> | <a href="#">MKI67</a>      | protein_coding       | <a href="#">10</a> |
| <a href="#">ENSG00000152253</a> | <a href="#">SPC25</a>      | protein_coding       | <a href="#">2</a>  |
| <a href="#">ENSG00000153234</a> | <a href="#">NR4A2</a>      | protein_coding       | <a href="#">2</a>  |
| <a href="#">ENSG00000156738</a> | <a href="#">MS4A1</a>      | protein_coding       | <a href="#">11</a> |
| <a href="#">ENSG00000157514</a> | <a href="#">TSC22D3</a>    | protein_coding       | <a href="#">X</a>  |
| <a href="#">ENSG00000161835</a> | <a href="#">GRASP</a>      | protein_coding       | <a href="#">12</a> |
| <a href="#">ENSG00000163808</a> | <a href="#">KIF15</a>      | protein_coding       | <a href="#">3</a>  |
| <a href="#">ENSG00000164929</a> | <a href="#">BAALC</a>      | protein_coding       | <a href="#">8</a>  |
| <a href="#">ENSG00000165030</a> | <a href="#">NFIL3</a>      | protein_coding       | <a href="#">9</a>  |
| <a href="#">ENSG00000166349</a> | <a href="#">RAG1</a>       | protein_coding       | <a href="#">11</a> |
| <a href="#">ENSG00000168078</a> | <a href="#">PBK</a>        | protein_coding       | <a href="#">8</a>  |
| <a href="#">ENSG00000169397</a> | <a href="#">RNASE3</a>     | protein_coding       | <a href="#">14</a> |
| <a href="#">ENSG00000169429</a> | <a href="#">CXCL8</a>      | protein_coding       | <a href="#">4</a>  |
| <a href="#">ENSG00000169575</a> | <a href="#">VPREB1</a>     | protein_coding       | <a href="#">22</a> |
| <a href="#">ENSG00000170293</a> | <a href="#">CMTM8</a>      | protein_coding       | <a href="#">3</a>  |
| <a href="#">ENSG00000170312</a> | <a href="#">CDK1</a>       | protein_coding       | <a href="#">10</a> |
| <a href="#">ENSG00000171246</a> | <a href="#">NPTX1</a>      | protein_coding       | <a href="#">17</a> |
| <a href="#">ENSG00000174123</a> | <a href="#">TLR10</a>      | protein_coding       | <a href="#">4</a>  |
| <a href="#">ENSG00000174500</a> | <a href="#">GCSAM</a>      | protein_coding       | <a href="#">3</a>  |
| <a href="#">ENSG00000175097</a> | <a href="#">RAG2</a>       | protein_coding       | <a href="#">11</a> |
| <a href="#">ENSG00000178999</a> | <a href="#">AURKB</a>      | protein_coding       | <a href="#">17</a> |
| <a href="#">ENSG00000185028</a> | <a href="#">LRRC14B</a>    | protein_coding       | <a href="#">5</a>  |
| <a href="#">ENSG00000185275</a> | <a href="#">CD24P4</a>     | processed_pseudogene | <a href="#">Y</a>  |
| <a href="#">ENSG00000188536</a> | <a href="#">HBA2</a>       | protein_coding       | <a href="#">16</a> |
| <a href="#">ENSG00000189057</a> | <a href="#">FAM111B</a>    | protein_coding       | <a href="#">11</a> |
| <a href="#">ENSG00000189283</a> | <a href="#">FHIT</a>       | protein_coding       | <a href="#">3</a>  |
| <a href="#">ENSG00000196549</a> | <a href="#">MME</a>        | protein_coding       | <a href="#">3</a>  |
| <a href="#">ENSG00000197747</a> | <a href="#">S100A10</a>    | protein_coding       | <a href="#">1</a>  |
| <a href="#">ENSG00000199568</a> | <a href="#">RNU5A-1</a>    | snRNA                | <a href="#">15</a> |
| <a href="#">ENSG00000199899</a> | <a href="#">RF00019</a>    | misc_RNA             | <a href="#">12</a> |
| <a href="#">ENSG00000200169</a> | <a href="#">RNU5D-1</a>    | snRNA                | <a href="#">1</a>  |
| <a href="#">ENSG00000206047</a> | <a href="#">DEFA1</a>      | protein_coding       | <a href="#">8</a>  |
| <a href="#">ENSG00000206172</a> | <a href="#">HBA1</a>       | protein_coding       | <a href="#">16</a> |
| <a href="#">ENSG00000206828</a> | <a href="#">RF00003</a>    | snRNA                | <a href="#">1</a>  |
| <a href="#">ENSG00000211904</a> | <a href="#">IGHJ2</a>      | IG_J_gene            | <a href="#">14</a> |
| <a href="#">ENSG00000211905</a> | <a href="#">IGHJ1</a>      | IG_J_gene            | <a href="#">14</a> |
| <a href="#">ENSG00000211966</a> | <a href="#">IGHV5-51</a>   | IG_V_gene            | <a href="#">14</a> |
| <a href="#">ENSG00000211978</a> | <a href="#">IGHV5-78</a>   | IG_V_pseudogene      | <a href="#">14</a> |
| <a href="#">ENSG00000227507</a> | <a href="#">LTB</a>        | protein_coding       | <a href="#">6</a>  |
| <a href="#">ENSG00000230945</a> | <a href="#">LINC01507</a>  | lincRNA              | <a href="#">9</a>  |
| <a href="#">ENSG00000236597</a> | <a href="#">IGHD7-27</a>   | IG_D_gene            | <a href="#">14</a> |
| <a href="#">ENSG00000237547</a> | <a href="#">IGHJ2P</a>     | IG_J_pseudogene      | <a href="#">14</a> |
| <a href="#">ENSG00000242887</a> | <a href="#">IGHJ3</a>      | IG_J_gene            | <a href="#">14</a> |
| <a href="#">ENSG00000244734</a> | <a href="#">HBB</a>        | protein_coding       | <a href="#">11</a> |
| <a href="#">ENSG00000253983</a> | <a href="#">AC087627.1</a> | antisense            | <a href="#">8</a>  |
| <a href="#">ENSG00000261434</a> | <a href="#">AC021087.3</a> | sense_overlapping    | <a href="#">5</a>  |
| <a href="#">ENSG00000265929</a> | <a href="#">MIR5195</a>    | miRNA                | <a href="#">14</a> |
| <a href="#">ENSG00000270640</a> | <a href="#">AC104695.3</a> | sense_intronic       | <a href="#">2</a>  |
| <a href="#">ENSG00000272398</a> | <a href="#">CD24</a>       | protein_coding       | <a href="#">6</a>  |
| <a href="#">ENSG00000275993</a> | <a href="#">SIK1B</a>      | protein_coding       | <a href="#">21</a> |

**PC2:**

| Gene stable ID                  | Gene name                  | Gene type      | Chromosome         |
|---------------------------------|----------------------------|----------------|--------------------|
| <a href="#">ENSG00000117318</a> | <a href="#">ID3</a>        | protein_coding | <a href="#">1</a>  |
| <a href="#">ENSG00000119535</a> | <a href="#">CSF3R</a>      | protein_coding | <a href="#">1</a>  |
| <a href="#">ENSG00000133048</a> | <a href="#">CHI3L1</a>     | protein_coding | <a href="#">1</a>  |
| <a href="#">ENSG00000143546</a> | <a href="#">S100A8</a>     | protein_coding | <a href="#">1</a>  |
| <a href="#">ENSG00000150681</a> | <a href="#">RGS18</a>      | protein_coding | <a href="#">1</a>  |
| <a href="#">ENSG00000158825</a> | <a href="#">CDA</a>        | protein_coding | <a href="#">1</a>  |
| <a href="#">ENSG00000159339</a> | <a href="#">PADI4</a>      | protein_coding | <a href="#">1</a>  |
| <a href="#">ENSG00000162747</a> | <a href="#">FCGR3B</a>     | protein_coding | <a href="#">1</a>  |
| <a href="#">ENSG00000163154</a> | <a href="#">TNFAIP8L2</a>  | protein_coding | <a href="#">1</a>  |
| <a href="#">ENSG00000163220</a> | <a href="#">S100A9</a>     | protein_coding | <a href="#">1</a>  |
| <a href="#">ENSG00000163221</a> | <a href="#">S100A12</a>    | protein_coding | <a href="#">1</a>  |
| <a href="#">ENSG00000163563</a> | <a href="#">MND4</a>       | protein_coding | <a href="#">1</a>  |
| <a href="#">ENSG00000186891</a> | <a href="#">TNFRSF18</a>   | protein_coding | <a href="#">1</a>  |
| <a href="#">ENSG00000235492</a> | <a href="#">LINC01221</a>  | lincRNA        | <a href="#">1</a>  |
| <a href="#">ENSG00000275538</a> | <a href="#">RNVU1-19</a>   | snRNA          | <a href="#">1</a>  |
| <a href="#">ENSG00000158050</a> | <a href="#">DUSP2</a>      | protein_coding | <a href="#">2</a>  |
| <a href="#">ENSG00000188011</a> | <a href="#">RTP5</a>       | protein_coding | <a href="#">2</a>  |
| <a href="#">ENSG00000189292</a> | <a href="#">ALKAL2</a>     | protein_coding | <a href="#">2</a>  |
| <a href="#">ENSG00000204099</a> | <a href="#">NEU4</a>       | protein_coding | <a href="#">2</a>  |
| <a href="#">ENSG00000012223</a> | <a href="#">LTF</a>        | protein_coding | <a href="#">3</a>  |
| <a href="#">ENSG00000073792</a> | <a href="#">IGF2BP2</a>    | protein_coding | <a href="#">3</a>  |
| <a href="#">ENSG00000164047</a> | <a href="#">CAMP</a>       | protein_coding | <a href="#">3</a>  |
| <a href="#">ENSG00000168334</a> | <a href="#">XIRP1</a>      | protein_coding | <a href="#">3</a>  |
| <a href="#">ENSG00000274840</a> | <a href="#">AC132807.2</a> | lincRNA        | <a href="#">3</a>  |
| <a href="#">ENSG00000163993</a> | <a href="#">S100P</a>      | protein_coding | <a href="#">4</a>  |
| <a href="#">ENSG00000038427</a> | <a href="#">VCAN</a>       | protein_coding | <a href="#">5</a>  |
| <a href="#">ENSG00000072571</a> | <a href="#">HMMR</a>       | protein_coding | <a href="#">5</a>  |
| <a href="#">ENSG00000160883</a> | <a href="#">HK3</a>        | protein_coding | <a href="#">5</a>  |
| <a href="#">ENSG00000168671</a> | <a href="#">UGT3A2</a>     | protein_coding | <a href="#">5</a>  |
| <a href="#">ENSG00000182578</a> | <a href="#">CSF1R</a>      | protein_coding | <a href="#">5</a>  |
| <a href="#">ENSG00000096006</a> | <a href="#">CRISP3</a>     | protein_coding | <a href="#">6</a>  |
| <a href="#">ENSG00000112299</a> | <a href="#">VNN1</a>       | protein_coding | <a href="#">6</a>  |
| <a href="#">ENSG00000198719</a> | <a href="#">DLL1</a>       | protein_coding | <a href="#">6</a>  |
| <a href="#">ENSG00000232891</a> | <a href="#">AL450344.3</a> | sense_intronic | <a href="#">6</a>  |
| <a href="#">ENSG00000105967</a> | <a href="#">TFEC</a>       | protein_coding | <a href="#">7</a>  |
| <a href="#">ENSG00000211688</a> | <a href="#">TRGJP2</a>     | TR_J_gene      | <a href="#">7</a>  |
| <a href="#">ENSG00000164821</a> | <a href="#">DEFA4</a>      | protein_coding | <a href="#">8</a>  |
| <a href="#">ENSG00000165071</a> | <a href="#">TMEM71</a>     | protein_coding | <a href="#">8</a>  |
| <a href="#">ENSG00000206047</a> | <a href="#">DEFA1</a>      | protein_coding | <a href="#">8</a>  |
| <a href="#">ENSG00000239839</a> | <a href="#">DEFA3</a>      | protein_coding | <a href="#">8</a>  |
| <a href="#">ENSG00000240247</a> | <a href="#">DEFA1B</a>     | protein_coding | <a href="#">8</a>  |
| <a href="#">ENSG00000271938</a> | <a href="#">AC103724.4</a> | lincRNA        | <a href="#">8</a>  |
| <a href="#">ENSG00000119508</a> | <a href="#">NR4A3</a>      | protein_coding | <a href="#">9</a>  |
| <a href="#">ENSG00000148346</a> | <a href="#">LCN2</a>       | protein_coding | <a href="#">9</a>  |
| <a href="#">ENSG00000229314</a> | <a href="#">ORM1</a>       | protein_coding | <a href="#">9</a>  |
| <a href="#">ENSG00000266017</a> | <a href="#">MIR4477B</a>   | miRNA          | <a href="#">9</a>  |
| <a href="#">ENSG00000118113</a> | <a href="#">MMP8</a>       | protein_coding | <a href="#">11</a> |
| <a href="#">ENSG00000134827</a> | <a href="#">TCN1</a>       | protein_coding | <a href="#">11</a> |
| <a href="#">ENSG00000149516</a> | <a href="#">MS4A3</a>      | protein_coding | <a href="#">11</a> |
| <a href="#">ENSG00000156575</a> | <a href="#">PRG3</a>       | protein_coding | <a href="#">11</a> |
| <a href="#">ENSG00000184545</a> | <a href="#">DUSP8</a>      | protein_coding | <a href="#">11</a> |



|                                 |                            |                      |                    |
|---------------------------------|----------------------------|----------------------|--------------------|
| <a href="#">ENSG00000090382</a> | <a href="#">LYZ</a>        | protein_coding       | <a href="#">12</a> |
| <a href="#">ENSG00000121316</a> | <a href="#">PLBD1</a>      | protein_coding       | <a href="#">12</a> |
| <a href="#">ENSG00000123358</a> | <a href="#">NR4A1</a>      | protein_coding       | <a href="#">12</a> |
| <a href="#">ENSG00000123405</a> | <a href="#">NFE2</a>       | protein_coding       | <a href="#">12</a> |
| <a href="#">ENSG00000161835</a> | <a href="#">GRASP</a>      | protein_coding       | <a href="#">12</a> |
| <a href="#">ENSG00000257883</a> | <a href="#">AC125603.2</a> | lincRNA              | <a href="#">12</a> |
| <a href="#">ENSG00000102524</a> | <a href="#">TNFSF13B</a>   | protein_coding       | <a href="#">13</a> |
| <a href="#">ENSG00000102837</a> | <a href="#">OLFM4</a>      | protein_coding       | <a href="#">13</a> |
| <a href="#">ENSG00000122025</a> | <a href="#">FLT3</a>       | protein_coding       | <a href="#">13</a> |
| <a href="#">ENSG00000100439</a> | <a href="#">ABHD4</a>      | protein_coding       | <a href="#">14</a> |
| <a href="#">ENSG00000100448</a> | <a href="#">CTSG</a>       | protein_coding       | <a href="#">14</a> |
| <a href="#">ENSG00000100504</a> | <a href="#">PYGL</a>       | protein_coding       | <a href="#">14</a> |
| <a href="#">ENSG00000126787</a> | <a href="#">DLGAP5</a>     | protein_coding       | <a href="#">14</a> |
| <a href="#">ENSG00000136315</a> | <a href="#">AL355922.1</a> | lincRNA              | <a href="#">14</a> |
| <a href="#">ENSG00000169385</a> | <a href="#">RNASE2</a>     | protein_coding       | <a href="#">14</a> |
| <a href="#">ENSG00000169397</a> | <a href="#">RNASE3</a>     | protein_coding       | <a href="#">14</a> |
| <a href="#">ENSG00000169413</a> | <a href="#">RNASE6</a>     | protein_coding       | <a href="#">14</a> |
| <a href="#">ENSG00000104043</a> | <a href="#">ATP8B4</a>     | protein_coding       | <a href="#">15</a> |
| <a href="#">ENSG00000173546</a> | <a href="#">CSPG4</a>      | protein_coding       | <a href="#">15</a> |
| <a href="#">ENSG00000270789</a> | <a href="#">AC135983.5</a> | processed_pseudogene | <a href="#">15</a> |
| <a href="#">ENSG00000171724</a> | <a href="#">VAT1L</a>      | protein_coding       | <a href="#">16</a> |
| <a href="#">ENSG00000188536</a> | <a href="#">HBA2</a>       | protein_coding       | <a href="#">16</a> |
| <a href="#">ENSG00000206053</a> | <a href="#">JPT2</a>       | protein_coding       | <a href="#">16</a> |
| <a href="#">ENSG00000005381</a> | <a href="#">MPO</a>        | protein_coding       | <a href="#">17</a> |
| <a href="#">ENSG00000121053</a> | <a href="#">EPX</a>        | protein_coding       | <a href="#">17</a> |
| <a href="#">ENSG00000131747</a> | <a href="#">TOP2A</a>      | protein_coding       | <a href="#">17</a> |
| <a href="#">ENSG00000008438</a> | <a href="#">PGLYRP1</a>    | protein_coding       | <a href="#">19</a> |
| <a href="#">ENSG00000099860</a> | <a href="#">GADD45B</a>    | protein_coding       | <a href="#">19</a> |
| <a href="#">ENSG00000104918</a> | <a href="#">RETN</a>       | protein_coding       | <a href="#">19</a> |
| <a href="#">ENSG00000105205</a> | <a href="#">CLC</a>        | protein_coding       | <a href="#">19</a> |
| <a href="#">ENSG00000124469</a> | <a href="#">CEACAM8</a>    | protein_coding       | <a href="#">19</a> |
| <a href="#">ENSG00000125740</a> | <a href="#">FOSB</a>       | protein_coding       | <a href="#">19</a> |
| <a href="#">ENSG00000126266</a> | <a href="#">FFAR1</a>      | protein_coding       | <a href="#">19</a> |
| <a href="#">ENSG00000170909</a> | <a href="#">OSCAR</a>      | protein_coding       | <a href="#">19</a> |
| <a href="#">ENSG00000171051</a> | <a href="#">FPR1</a>       | protein_coding       | <a href="#">19</a> |
| <a href="#">ENSG00000172232</a> | <a href="#">AZU1</a>       | protein_coding       | <a href="#">19</a> |
| <a href="#">ENSG00000196415</a> | <a href="#">PRTN3</a>      | protein_coding       | <a href="#">19</a> |
| <a href="#">ENSG00000197561</a> | <a href="#">ELANE</a>      | protein_coding       | <a href="#">19</a> |
| <a href="#">ENSG00000087586</a> | <a href="#">AURKA</a>      | protein_coding       | <a href="#">20</a> |
| <a href="#">ENSG00000100985</a> | <a href="#">MMP9</a>       | protein_coding       | <a href="#">20</a> |
| <a href="#">ENSG00000101347</a> | <a href="#">SAMHD1</a>     | protein_coding       | <a href="#">20</a> |
| <a href="#">ENSG00000101425</a> | <a href="#">BPI</a>        | protein_coding       | <a href="#">20</a> |
| <a href="#">ENSG00000124107</a> | <a href="#">SLPI</a>       | protein_coding       | <a href="#">20</a> |
| <a href="#">ENSG00000125810</a> | <a href="#">CD93</a>       | protein_coding       | <a href="#">20</a> |
| <a href="#">ENSG00000125869</a> | <a href="#">LAMP5</a>      | protein_coding       | <a href="#">20</a> |
| <a href="#">ENSG00000225988</a> | <a href="#">LAMP5-AS1</a>  | antisense            | <a href="#">20</a> |
| <a href="#">ENSG00000165168</a> | <a href="#">CYBB</a>       | protein_coding       | <a href="#">X</a>  |
| <a href="#">ENSG00000274536</a> | <a href="#">AL034397.3</a> | antisense            | <a href="#">X</a>  |
| <a href="#">ENSG00000129824</a> | <a href="#">RPS4Y1</a>     | protein_coding       | <a href="#">Y</a>  |

Sheet1

| Sample | Chrom | Position  | Ref_base | Mut_base | Variant Allele Freq | Gene_ID       | Transcript_ID       | c.Annot         | p.Annot      | Consequence      |
|--------|-------|-----------|----------|----------|---------------------|---------------|---------------------|-----------------|--------------|------------------|
| MA4_01 | Chr17 | 15134242  | G        | A        | 0.188959285         | PMP22         | ENST00000395938_r73 | c.475 C>T       | p.R159C      | MISSENSE         |
| MA4_01 | Chr3  | 47144912  | A        | T        | 0.184537246         | SETD2         | ENST00000409792_r73 | c.4841 T>A      | p.I1614K     | MISSENSE         |
| MA4_02 | Chr1  | 29602226  | C        | T        | 0.118736142         | PTPRU         | ENST00000345512_r73 | c.1411 C>T      | p.R471C      | MISSENSE         |
| MA4_02 | Chr1  | 52442655  | G        | A        | 0.366571019         | RAB3B         | ENST00000371655_r73 | c.135 C>T       | p.D45D       | SILENT           |
| MA4_02 | Chr11 | 67265042  | G        | A        | 0.43257233          | PITPNM1       | ENST00000534749_r73 | c.1891 C>T      | p.R631C      | MISSENSE         |
| MA4_02 | Chr13 | 76415945  | C        | T        | 0.409429001         | LMO7          | ENST00000341547_r73 | c.3011 C>T      | p.P1004L     | MISSENSE         |
| MA4_02 | Chr8  | 144993489 | G        | A        | 0.552685248         | PLEC          | ENST00000345136_r73 | c.10500 C>T     | p.R3500R     | SILENT           |
| MA4_02 | ChrX  | 44942756  | -        | CAGG     | 0.127366057         | KDM6A         | ENST00000377967_r73 | c.3336 ->CAGG   | p.V1112fs*40 | FRAMESHIFT       |
| MA4_03 | ChrX  | 11196264  | C        | T        | 0.902975312         | ARHGAP6       | ENST00000380736_r73 | c.976 G>A       | p.V326M      | MISSENSE         |
| MA4_04 | Chr1  | 119466114 | G        | A        | 0.388781998         | TBX15         | ENST00000207157_r73 | c.488 C>T       | p.T163M      | MISSENSE         |
| MA4_04 | Chr10 | 124351862 | C        | T        | 0.334958854         | DMBT1         | ENST00000368909_r73 | c.2251 C>T      | p.R751*      | NONSENSE         |
| MA4_04 | Chr5  | 54529067  | T        | G        | 0.421348315         | CCNO          | ENST00000282572_r73 | c.285 A>C       | p.L95L       | SILENT           |
| MA4_04 | Chr5  | 76028542  | C        | T        | 0.06541033          | F2R           | ENST00000319211_r73 | c.492 C>T       | p.S164S      | SILENT           |
| MA4_05 | Chr4  | 170028169 | T        | C        | 0.155313712         | SH3RF1        | ENST00000284637_r73 | c.2327 A>G      | p.D776G      | MISSENSE         |
| MA4_06 | Chr10 | 22826203  | G        | A        | 0.057377049         | PIP4K2A       | ENST00000376573_r73 | c.1148 C>T      | p.A383V      | MISSENSE         |
| MA4_06 | Chr16 | 943056    | C        | T        | 0.455605039         | LMF1          | ENST00000262301_r73 | c.680 G>A       | p.R227Q      | MISSENSE         |
| MA4_06 | Chr17 | 26910871  | G        | A        | 0.273290703         | RP11-192H23.4 | ENST00000531839_r73 | c.761 C>T       | p.T254M      | MISSENSE         |
| MA4_06 | Chr17 | 66878843  | C        | T        | 0.064910079         | ABCA8         | ENST00000269080_r73 | c.3605 G>A      | p.S1202N     | MISSENSE         |
| MA4_06 | Chr12 | 25398284  | C        | A        | 0.097262667         | KRAS          | ENST00000311936_r73 | c.35 G>T        | p.G12V       | MISSENSE         |
| MA4_06 | Chr12 | 25398281  | C        | T        | 0.04127907          | KRAS          | ENST00000311936_r73 | c.38 G>A        | p.G13D       | MISSENSE         |
| MA4_07 | Chr14 | 38060843  | G        | A        | 0.044476206         | FOXA1         | ENST00000250448_r73 | c.1146 C>T      | p.H382H      | SILENT           |
| MA4_07 | Chr1  | 115258748 | C        | T        | 0.015116414         | NRAS          | ENST00000369535_r73 | c.34 G>A        | p.G12S       | MISSENSE         |
| MA4_08 | Chr1  | 32157115  | T        | A        | 0.073264246         | COL16A1       | ENST00000373672_r73 | Exon 19 - 2 A>T | -            | ESSENTIAL_SPLICE |
| MA4_08 | Chr11 | 3723715   | G        | A        | 0.323017992         | NUP98         | ENST00000324932_r73 | c.3490 C>T      | p.P1164S     | MISSENSE         |
| MA4_08 | Chr12 | 25378561  | G        | A        | 0.348619422         | KRAS          | ENST00000311936_r73 | c.437 C>T       | p.A146V      | MISSENSE         |
| MA4_08 | Chr2  | 99438545  | C        | T        | 0.402624515         | KIAA1211L     | ENST00000397899_r73 | c.2191 G>A      | p.G731R      | MISSENSE         |
| MA4_09 | Chr1  | 156640767 | C        | T        | 0.432276908         | NES           | ENST00000368223_r73 | c.3213 G>A      | p.V1071V     | SILENT           |
| MA4_09 | Chr10 | 134622358 | C        | T        | 0.24640952          | TTC40         | ENST00000368586_r73 | c.7715 G>A      | p.R2572Q     | MISSENSE         |
| MA4_09 | Chr16 | 85942669  | G        | C        | 0.042319508         | IRF8          | ENST00000268638_r73 | c.248 G>C       | p.R83P       | MISSENSE         |
| MA4_09 | Chr17 | 33875517  | C        | T        | 0.254864556         | SLFN14        | ENST00000415846_r73 | c.2480 G>A      | p.R827H      | MISSENSE         |
| MA4_09 | Chr17 | 29196542  | G        | A        | 0.258426966         | ATAD5         | ENST00000321990_r73 | c.3485 G>A      | p.R1162H     | MISSENSE         |
| MA4_10 | Chr11 | 113700009 | A        | T        | 0.25327096          | USP28         | ENST0000003302_r73  | c.969 T>A       | p.Y323*      | NONSENSE         |
| MA4_10 | Chr18 | 63527018  | G        | A        | 0.164255091         | CDH7          | ENST00000323011_r73 | c.1569 G>A      | p.T523T      | SILENT           |
| MA4_10 | Chr1  | 115258747 | C        | T        | 0.018408166         | NRAS          | ENST00000369535_r73 | c.35 G>A        | p.G12D       | MISSENSE         |
| MA4_10 | Chr1  | 115258744 | C        | T        | 0.027023838         | NRAS          | ENST00000369535_r73 | c.38 G>A        | p.G13D       | MISSENSE         |
| MA4_10 | Chr1  | 115258748 | C        | T        | 0.082718744         | NRAS          | ENST00000369535_r73 | c.34 G>A        | p.G12S       | MISSENSE         |

Sheet1

|         |       |           |   |   |             |            |                     |             |          |          |
|---------|-------|-----------|---|---|-------------|------------|---------------------|-------------|----------|----------|
| MA4_11  | Chr11 | 117329595 | G | A | 0.065889916 | DSCAML1    | ENST00000321322_r73 | c.3623 C>T  | p.T1208M | MISSENSE |
| MA4_11  | Chr4  | 30724484  | G | A | 0.114128216 | PCDH7      | ENST00000361762_r73 | c.1440 G>A  | p.Q480Q  | SILENT   |
| MA4_11  | ChrX  | 122800961 | G | A | 0.1242656   | THOC2      | ENST00000355725_r73 | c.1186 C>T  | p.R396*  | NONSENSE |
| MA4_11  | Chr1  | 115258747 | C | T | 0.130104615 | NRAS       | ENST00000369535_r73 | c.35 G>A    | p.G12D   | MISSENSE |
| MA4_12  | Chr1  | 115258747 | C | T | 0.03465982  | NRAS       | ENST00000369535_r73 | c.35 G>A    | p.G12D   | MISSENSE |
| MA4_12  | Chr1  | 115258744 | C | T | 0.037227214 | NRAS       | ENST00000369535_r73 | c.38 G>A    | p.G13D   | MISSENSE |
| MA4_13  | Chr1  | 77093213  | G | A | 0.431059092 | ST6GALNAC3 | ENST00000328299_r73 | c.700 G>A   | p.V234I  | MISSENSE |
| MA4_14  | Chr1  | 12183370  | G | A | 0.378454145 | TNFRSF8    | ENST00000263932_r73 | c.976 G>A   | p.A326T  | MISSENSE |
| MA4_14  | ChrX  | 153582588 | C | T | 0.467612001 | FLNA       | ENST00000360319_r73 | c.5464 G>A  | p.V1822M | MISSENSE |
| MA4_14R | Chr1  | 115258748 | C | T | 0.443557526 | NRAS       | ENST00000369535_r73 | c.34 G>A    | p.G12S   | MISSENSE |
| MA4_15  | ChrX  | 32503115  | A | G | 0.41562785  | DMD        | ENST00000378677_r73 | c.2712 T>C  | p.D904D  | SILENT   |
| MA4_15  | Chr13 | 28602340  | G | T | 0.441176471 | FLT3       | ENST00000241453_r73 | c.2028 C>A  | p.N676K  | MISSENSE |
| MA4_16  | Chr20 | 62493709  | C | T | 0.348211355 | ABHD16B    | ENST00000369916_r73 | c.816 C>T   | p.F272F  | SILENT   |
| MA4_17  | Chr12 | 25398284  | C | A | 0.41875     | KRAS       | ENST00000311936_r73 | c.35 G>T    | p.G12V   | MISSENSE |
| MA4_17R | Chr1  | 26670871  | G | T | 0.153743711 | AIM1L      | ENST00000374207_r73 | c.313 C>A   | p.L105M  | MISSENSE |
| MA4_17R | Chr12 | 70965002  | T | A | 0.139347021 | PTPRB      | ENST00000334414_r73 | c.3174 A>T  | p.S1058S | SILENT   |
| MA4_17R | Chr15 | 60747314  | G | C | 0.124878397 | NARG2      | ENST00000261520_r73 | c.831 C>G   | p.H277Q  | MISSENSE |
| MA4_17R | Chr16 | 67228769  | G | A | 0.159920574 | E2F4       | ENST00000379378_r73 | c.694 G>A   | p.A232T  | MISSENSE |
| MA4_17R | Chr19 | 1987165   | C | T | 0.171126761 | BTBD2      | ENST00000255608_r73 | c.1269 G>A  | p.Q423Q  | SILENT   |
| MA4_17R | Chr4  | 48490578  | C | T | 0.179612163 | SLC10A4    | ENST00000273861_r73 | c.936 C>T   | p.Y312Y  | SILENT   |
| MA4_17R | Chr5  | 90144542  | G | A | 0.167889439 | GPR98      | ENST00000405460_r73 | c.17108 G>A | p.R5703H | MISSENSE |
| MA4_17R | ChrX  | 37979633  | G | C | 0.257247584 | SYTL5      | ENST00000297875_r73 | c.1619 G>C  | p.G540A  | MISSENSE |
| MA4_17R | Chr9  | 732503    | G | A | 0.045454546 | KANK1      | ENST00000382303_r73 | c.3131 G>A  | p.R1044Q | MISSENSE |
| MA4_18  | Chr12 | 25398281  | C | T | 0.212984055 | KRAS       | ENST00000311936_r73 | c.38 G>A    | p.G13D   | MISSENSE |
| MA4_18R | Chr10 | 50315892  | G | A | 0.137142857 | VSTM4      | ENST00000332853_r73 | c.204 C>T   | p.F68F   | SILENT   |
| MA4_18R | Chr10 | 61898828  | C | T | 0.084442696 | ANK3       | ENST00000280772_r73 | c.2632 G>A  | p.G878R  | MISSENSE |
| MA4_18R | Chr11 | 65628573  | G | A | 0.166583665 | MUS81      | ENST00000308110_r73 | c.265 G>A   | p.G89S   | MISSENSE |
| MA4_18R | Chr11 | 73074260  | C | G | 0.183411215 | ARHGEF17   | ENST00000263674_r73 | c.5006 C>G  | p.T1669S | MISSENSE |
| MA4_18R | Chr11 | 108593986 | G | A | 0.146759388 | DDX10      | ENST00000322536_r73 | c.1762 G>A  | p.D588N  | MISSENSE |
| MA4_18R | Chr14 | 75375610  | C | G | 0.068568233 | RPS6KL1    | ENST00000555647_r73 | c.1386 G>C  | p.T462T  | SILENT   |
| MA4_18R | Chr15 | 79296469  | G | A | 0.151010002 | RASGRF1    | ENST00000558480_r73 | c.2124 C>T  | p.Y708Y  | SILENT   |
| MA4_18R | Chr16 | 71065790  | G | C | 0.086487782 | HYDIN      | ENST00000393567_r73 | c.2560 C>G  | p.P854A  | MISSENSE |
| MA4_18R | Chr17 | 10541516  | G | C | 0.13260947  | MYH3       | ENST00000583535_r73 | c.3573 C>G  | p.A1191A | SILENT   |
| MA4_18R | Chr18 | 74587457  | C | G | 0.181245626 | ZNF236     | ENST00000253159_r73 | c.671 C>G   | p.P224R  | MISSENSE |
| MA4_18R | Chr19 | 9070839   | C | T | 0.172091641 | MUC16      | ENST00000397910_r73 | c.16607 G>A | p.R5536Q | MISSENSE |
| MA4_18R | Chr19 | 13409769  | C | T | 0.001333088 | CACNA1A    | ENST00000360228_r73 | c.2678 G>A  | p.R893Q  | MISSENSE |
| MA4_18R | Chr2  | 69556824  | C | G | 0.131769029 | GFPT1      | ENST00000361060_r73 | c.1535 G>C  | p.R512P  | MISSENSE |

Sheet1

|         |       |           |        |   |             |          |                     |                 |               |            |
|---------|-------|-----------|--------|---|-------------|----------|---------------------|-----------------|---------------|------------|
| MA4_18R | Chr2  | 219893011 | G      | A | 0.002873563 | CCDC108  | ENST00000341552_r73 | c.1763 C>T      | p.T588M       | MISSENSE   |
| MA4_18R | Chr20 | 36374918  | C      | T | 0.174187651 | CTNBL1   | ENST00000361383_r73 | c.375 C>T       | p.H125H       | SILENT     |
| MA4_18R | Chr22 | 43901486  | G      | A | 0.181884817 | MPPED1   | ENST00000417669_r73 | c.971 G>A       | p.R324Q       | MISSENSE   |
| MA4_18R | Chr3  | 48681041  | G      | C | 0.207036615 | CELSR3   | ENST00000164024_r73 | c.8235 C>G      | p.V2745V      | SILENT     |
| MA4_18R | Chr3  | 62502298  | C      | T | 0.139903995 | CADPS    | ENST00000383710_r73 | c.2414 G>A      | p.R805Q       | MISSENSE   |
| MA4_18R | Chr9  | 139404399 | C      | T | 0.24613351  | NOTCH1   | ENST00000277541_r73 | c.2755 G>A      | p.G919R       | MISSENSE   |
| MA4_18R | Chr3  | 138187036 | G      | C | 0.160185368 | ESYT3    | ENST00000389567_r73 | c.1308 G>C      | p.E436D       | MISSENSE   |
| MA4_18R | Chr10 | 95069922  | C      | T | 0.159251197 | MYOF     | ENST00000358334_r73 | c.5963 G>A      | p.R1988Q      | MISSENSE   |
| MA4_18R | Chr6  | 143093951 | C      | T | 0.178131544 | HIVEP2   | ENST00000367604_r73 | c.1925 G>A      | p.R642Q       | MISSENSE   |
| MA4_18R | Chr16 | 30410163  | G      | A | 0.162408063 | ZNF48    | ENST00000320159_r73 | c.1592 G>A      | p.R531Q       | MISSENSE   |
| MA4_18R | Chr11 | 17742858  | G      | A | 0.065334358 | MYOD1    | ENST00000250003_r73 | c.766 G>A       | p.V256M       | MISSENSE   |
| MA4_18R | Chr13 | 80055428  | C      | T | 0.097651422 | NDFIP2   | ENST00000218652_r73 | c.90 C>T        | p.T30T        | SILENT     |
| MA4_18R | Chr19 | 17439019  | C      | T | 0.148471616 | ANO8     | ENST00000159087_r73 | c.2178 G>A      | p.S726S       | SILENT     |
| MA4_18R | Chr4  | 110448484 | G      | A | 0.131083481 | SEC24B   | ENST00000399100_r73 | c.2867 G>A      | p.R956Q       | MISSENSE   |
| MA4_18R | Chr6  | 96034806  | G      | A | 0.097014925 | MANEA    | ENST00000358812_r73 | c.491 G>A       | p.R164Q       | MISSENSE   |
| MA4_18R | Chr6  | 154414520 | C      | T | 0.117647059 | OPRM1    | ENST00000229768_r73 | c.1280 C>T      | p.S427L       | MISSENSE   |
| MA4_18R | Chr7  | 97937061  | G      | A | 0.14        | BAIAP2L1 | ENST00000005260_r73 | c.1103 C>T      | p.T368M       | MISSENSE   |
| MA4_18R | Chr7  | 100634393 | T      | G | 0.24        | MUC12    | ENST00000536621_r73 | c.549 T>G       | p.S183R       | MISSENSE   |
| MA4_18R | Chr7  | 103216088 | C      | G | 0.215384615 | RELN     | ENST00000428762_r73 | c.4210 G>C      | p.D1404H      | MISSENSE   |
| MA4_18R | Chr8  | 110587801 | G      | A | 0.116129032 | SYBU     | ENST00000533895_r73 | c.1323 C>T      | p.F441F       | SILENT     |
| MA4_18R | Chr8  | 121209184 | T      | A | 0.205714286 | COL14A1  | ENST00000297848_r73 | c.591 T>A       | p.I197I       | SILENT     |
| MA4_18R | Chr9  | 15657131  | A      | G | 0.470588235 | CCDC171  | ENST00000380701_r73 | c.829 A>G       | p.T277A       | MISSENSE   |
| MA4_18R | Chr9  | 117846595 | G      | C | 0.110294118 | TNC      | ENST00000350763_r73 | c.2024 C>G      | p.T675R       | MISSENSE   |
| MA4_18R | Chr9  | 122011276 | T      | A | 0.163043478 | DBC1     | ENST00000265922_r73 | c.371 A>T       | p.K124M       | MISSENSE   |
| MA4_18R | ChrX  | 54117762  | G      | A | 0.104477612 | FAM120C  | ENST00000375180_r73 | c.2410 C>T      | p.R804*       | NONSENSE   |
| MA4_18R | ChrX  | 71876082  | C      | T | 0.221698113 | PHKA1    | ENST00000373542_r73 | c.929 G>A       | p.R310H       | MISSENSE   |
| MA4_18R | ChrX  | 152827614 | G      | A | 0.105263158 | ATP2B3   | ENST00000349466_r73 | c.3073 G>A      | p.G1025R      | MISSENSE   |
| MA4_18R | Chr3  | 32571050  | T      | - | 0.135135135 | DYNC1L1  | ENST00000273130_r73 | c.1288 A>-      | p.I430fs*5    | FRAMESHIFT |
| MA4_19  | Chr22 | 22712553  | G      | A | 0.039168111 | IGLV1-47 | ENST00000390294_r73 | c.296 G>A       | p.R99Q        | MISSENSE   |
| MA4_20  | Chr1  | 115256529 | T      | A | 0.264634839 | NRAS     | ENST00000369535_r73 | c.182 A>T       | p.Q61L        | MISSENSE   |
| MA4_20  | Chr16 | 2283522   | C      | T | 0.452965621 | E4F1     | ENST00000301727_r73 | c.1140 C>T      | p.I380I       | SILENT     |
| MA4_20  | Chr22 | 40807815  | G      | A | 0.241766284 | MKL1     | ENST00000355630_r73 | c.2375 C>T      | p.S792L       | MISSENSE   |
| MA4_20  | Chr12 | 53682409  | GCCCAT | - | 0.453414352 | ESPL1    | ENST00000552462_r73 | c.4634 GCCCAT>- | p.S1545 SPC>S | MISSENSE   |
| MA4_20R | Chr1  | 115256529 | T      | A | 0.201530891 | NRAS     | ENST00000369535_r73 | c.182 A>T       | p.Q61L        | MISSENSE   |
| MA4_20R | Chr10 | 24889767  | C      | T | 0.069881598 | ARHGAP21 | ENST00000396432_r73 | c.2940 G>A      | p.T980T       | SILENT     |
| MA4_20R | Chr11 | 108380476 | C      | G | 0.09033675  | EXPH5    | ENST00000265843_r73 | c.5758 G>C      | p.G1920R      | MISSENSE   |
| MA4_20R | Chr16 | 2283522   | C      | T | 0.229450857 | E4F1     | ENST00000301727_r73 | c.1140 C>T      | p.I380I       | SILENT     |

Sheet1

|         |       |           |        |           |             |         |                     |                   |               |          |
|---------|-------|-----------|--------|-----------|-------------|---------|---------------------|-------------------|---------------|----------|
| MA4_20R | Chr17 | 7577121   | G      | A         | 0.211493113 | TP53    | ENST00000269305_r73 | c.817 C>T         | p.R273C       | MISSENSE |
| MA4_20R | Chr22 | 40807815  | G      | A         | 0.237129485 | MKL1    | ENST00000355630_r73 | c.2375 C>T        | p.S792L       | MISSENSE |
| MA4_20R | Chr12 | 53682409  | GCCCAT | -         | 0.220722509 | ESPL1   | ENST00000552462_r73 | c.4634 GCCCAT>-   | p.S1545 SPC>S | MISSENSE |
| MA4_21  | Chr11 | 70332174  | T      | G         | 0.186440678 | SHANK2  | ENST00000409161_r73 | c.2436 A>C        | p.T812T       | SILENT   |
| MA4_21  | Chr5  | 139422532 | -      | GCTGCTGCT | 0.391304348 | NRG2    | ENST00000361474_r73 | c.123 ->AGCAGCAGC | p.S41 S>RAAA  | MISSENSE |
| MA4_22  | Chr9  | 127216294 | C      | A         | 0.475362319 | GPR144  | ENST00000334810_r73 | c.996 C>A         | p.C332*       | NONSENSE |
| MA4_22  | Chr12 | 23818481  | C      | T         | 0.178747941 | SOX5    | ENST00000546136_r73 | c.789 G>A         | p.P263P       | SILENT   |
| MA4_22  | Chr15 | 75114997  | C      | T         | 0.116832958 | LMAN1L  | ENST00000309664_r73 | c.1146 C>T        | p.V382V       | SILENT   |
| MA4_22  | Chr10 | 48428949  | C      | T         | 0.391472285 | GDF10   | ENST00000224605_r73 | c.937 G>A         | p.A313T       | MISSENSE |
| MA4_22  | Chr1  | 31836903  | G      | T         | 0.078651685 | ZCCHC17 | ENST00000344147_r73 | c.589 G>T         | p.D197Y       | MISSENSE |
| MA4_22  | Chr16 | 46993000  | C      | T         | 0.115942029 | DNAJA2  | ENST00000317089_r73 | c.962 G>A         | p.R321H       | MISSENSE |
| MA4_22  | Chr1  | 115258747 | C      | T         | 0.109902848 | NRAS    | ENST00000369535_r73 | c.35 G>A          | p.G12D        | MISSENSE |
| MA4_22  | Chr1  | 115258744 | C      | T         | 0.013689556 | NRAS    | ENST00000369535_r73 | c.38 G>A          | p.G13D        | MISSENSE |
| MA4_22  | Chr12 | 25398284  | C      | A         | 0.199459703 | KRAS    | ENST00000311936_r73 | c.35 G>A          | p.G12D        | MISSENSE |
| MA4_22  | Chr4  | 26422290  | C      | T         | 0.228111724 | RBPJ    | ENST00000345843_r73 | c.433 C>T         | p.R145W       | MISSENSE |
| MA4_22  | Chr11 | 95825853  | G      | A         | 0.091054045 | MAML2   | ENST00000524717_r73 | c.1342 C>T        | p.R448W       | MISSENSE |
| MA4_22R | Chr13 | 52549042  | G      | A         | 0.34623323  | ATP7B   | ENST00000242839_r73 | c.314 C>T         | p.S105L       | MISSENSE |
| MA4_22R | Chr18 | 42531586  | G      | A         | 0.377956481 | SETBP1  | ENST00000282030_r73 | c.2281 G>A        | p.V761M       | MISSENSE |
| MA4_22R | Chr16 | 16173246  | G      | A         | 0.763759526 | ABCC1   | ENST00000399410_r73 | c.2026 G>A        | p.V676M       | MISSENSE |
| MA4_22R | Chr16 | 76555115  | C      | T         | 0.138461539 | CNTNAP4 | ENST00000478060_r73 | c.2225 C>T        | p.A742V       | MISSENSE |
| MA4_22R | Chr16 | 81078294  | G      | A         | 0.376859504 | ATMIN   | ENST00000299575_r73 | c.2191 G>A        | p.V731M       | MISSENSE |
| MA4_22R | Chr6  | 96997360  | G      | A         | 0.402628435 | UFL1    | ENST00000369278_r73 | c.1593 G>A        | p.T531T       | SILENT   |
| MA4_22R | Chr3  | 137988903 | G      | A         | 0.271493213 | ARMC8   | ENST00000481646_r73 | c.1366 G>A        | p.V456I       | MISSENSE |
| MA4_22R | Chr3  | 142277509 | G      | C         | 0.068720379 | ATR     | ENST00000350721_r73 | c.1842 C>G        | p.A614A       | SILENT   |
| MA4_22R | Chr9  | 124632975 | C      | T         | 0.417341041 | TLL11   | ENST00000321582_r73 | c.1804 G>A        | p.E602K       | MISSENSE |
| MA4_22R | Chr12 | 20801787  | A      | C         | 0.076212471 | PDE3A   | ENST00000359062_r73 | c.2731 A>C        | p.K911Q       | MISSENSE |
| MA4_22R | Chr12 | 21795009  | G      | C         | 0.300685136 | LDHB    | ENST00000396076_r73 | c.472 C>G         | p.R158G       | MISSENSE |
| MA4_22R | Chr12 | 76740737  | C      | T         | 0.246085011 | BBS10   | ENST00000393262_r73 | c.1028 G>A        | p.R343Q       | MISSENSE |
| MA4_22R | Chr11 | 95825853  | G      | A         | 0.131651985 | MAML2   | ENST00000524717_r73 | c.1342 C>T        | p.R448W       | MISSENSE |
| MA4_22R | Chr15 | 68695329  | C      | T         | 0.400844406 | ITGA11  | ENST00000315757_r73 | c.92 G>A          | p.R31Q        | MISSENSE |
| MA4_22R | Chr15 | 98513945  | G      | A         | 0.296703297 | ARRDC4  | ENST00000268042_r73 | c.1172 G>A        | p.R391Q       | MISSENSE |
| MA4_22R | Chr8  | 144994538 | G      | A         | 0.094175286 | PLEC    | ENST00000345136_r73 | c.9451 C>T        | p.R3151C      | MISSENSE |
| MA4_22R | Chr4  | 26422290  | C      | T         | 0.229225636 | RBPJ    | ENST00000345843_r73 | c.433 C>T         | p.R145W       | MISSENSE |
| MA4_22R | Chr4  | 77036593  | C      | T         | 0.685747664 | NUP54   | ENST00000264883_r73 | c.1450 G>A        | p.D484N       | MISSENSE |
| MA4_22R | Chr4  | 88986625  | G      | A         | 0.366681825 | PKD2    | ENST00000237596_r73 | c.2218 G>A        | p.E740K       | MISSENSE |
| MA4_22R | Chr10 | 70105604  | G      | A         | 0.2566146   | RUFY2   | ENST00000388768_r73 | c.1847 C>T        | p.P616L       | MISSENSE |
| MA4_22R | Chr5  | 50091171  | G      | A         | 0.331018519 | PARP8   | ENST00000505697_r73 | c.1348 G>A        | p.A450T       | MISSENSE |

Sheet1

|         |       |           |   |   |             |         |                     |            |          |          |
|---------|-------|-----------|---|---|-------------|---------|---------------------|------------|----------|----------|
| MA4_22R | Chr7  | 131825491 | C | T | 0.248064138 | PLXNA4  | ENST00000359827_r73 | c.5305 G>A | p.A1769T | MISSENSE |
| MA4_22R | Chr7  | 150553626 | C | T | 0.278790389 | AOC1    | ENST00000493429_r73 | c.68 C>T   | p.P23L   | MISSENSE |
| MA4_22R | Chr17 | 7577539   | G | A | 0.788971717 | TP53    | ENST00000269305_r73 | c.742 C>T  | p.R248W  | MISSENSE |
| MA4_22R | Chr17 | 27185635  | G | A | 0.409534128 | ERAL1   | ENST00000254928_r73 | c.753 G>A  | p.T251T  | SILENT   |
| MA4_22R | Chr1  | 15987008  | G | A | 0.344632768 | RSC1A1  | ENST00000345034_r73 | c.645 G>A  | p.T215T  | SILENT   |
| MA4_22R | Chr1  | 223177194 | G | A | 0.365754813 | DISP1   | ENST00000284476_r73 | c.2455 G>A | p.A819T  | MISSENSE |
| MA4_22R | Chr1  | 15987008  | G | A | 0.344632768 | DDI2    | ENST00000480945_r73 | c.1923 G>A | -        | UTR      |
| MA4_22R | Chr7  | 131825491 | C | T | 0.248064138 | PLXNA4  | ENST00000359827_r73 | c.5546 C>T | p.A1849V | MISSENSE |
| MA4_22R | Chr12 | 25398284  | C | A | 0.538461538 | KRAS    | ENST00000311936_r73 | c.437 C>T  | p.A146V  | MISSENSE |
| MA4_22R | Chr9  | 127216294 | C | A | 0.472222222 | GPR144  | ENST00000334810_r73 | c.996 C>A  | p.C332*  | NONSENSE |
| MA4_22R | Chr11 | 899385    | C | T | 0.051546392 | CHID1   | ENST00000323578_r73 | c.563 G>A  | p.G188D  | MISSENSE |
| MA4_22R | Chr11 | 3727740   | G | C | 0.051724138 | NUP98   | ENST00000324932_r73 | c.2860 C>G | p.Q954E  | MISSENSE |
| MA4_22R | Chr11 | 3756473   | C | T | 0.076086957 | NUP98   | ENST00000324932_r73 | c.1490 G>A | p.G497E  | MISSENSE |
| MA4_22R | Chr11 | 5067819   | C | T | 0.070588235 | OR52J3  | ENST00000380370_r73 | c.64 C>T   | p.L22L   | SILENT   |
| MA4_22R | Chr11 | 5444297   | G | A | 0.06043956  | OR51Q1  | ENST00000300778_r73 | c.867 G>A  | p.M289I  | MISSENSE |
| MA4_22R | Chr11 | 5565853   | C | T | 0.303571429 | OR52H1  | ENST00000322653_r73 | c.901 G>A  | p.G301R  | MISSENSE |
| MA4_22R | Chr11 | 5809210   | C | T | 0.059701493 | OR52N1  | ENST00000317078_r73 | c.837 G>A  | p.M279I  | MISSENSE |
| MA4_22R | Chr11 | 8941004   | G | A | 0.291139241 | AKIP1   | ENST00000299576_r73 | c.529 G>A  | p.V177M  | MISSENSE |
| MA4_22R | Chr11 | 9735099   | C | G | 0.050420168 | SWAP70  | ENST00000318950_r73 | c.327 C>G  | p.L109L  | SILENT   |
| MA4_22R | Chr11 | 32975682  | G | A | 0.322033898 | QSER1   | ENST00000399302_r73 | c.4070 G>A | p.R1357H | MISSENSE |
| MA4_22R | Chr11 | 33090290  | G | A | 0.064516129 | TCP11L1 | ENST00000334274_r73 | c.1212 G>A | p.V404V  | SILENT   |
| MA4_22R | Chr11 | 36248802  | G | A | 0.238938053 | LDLRAD3 | ENST00000315571_r73 | c.622 G>A  | p.V208M  | MISSENSE |
| MA4_22R | Chr11 | 46388273  | C | T | 0.098765432 | DGKZ    | ENST00000454345_r73 | c.467 C>T  | p.P156L  | MISSENSE |
| MA4_22R | Chr11 | 46724646  | C | A | 0.136363636 | ZNF408  | ENST00000311764_r73 | c.505 C>A  | p.L169M  | MISSENSE |
| MA4_22R | Chr11 | 47446685  | G | C | 0.125       | PSMC3   | ENST00000298852_r73 | c.272 C>G  | p.S91C   | MISSENSE |
| MA4_22R | Chr11 | 56409825  | C | G | 0.051502146 | OR5AP2  | ENST00000302981_r73 | c.91 G>C   | p.G31R   | MISSENSE |
| MA4_22R | Chr11 | 57564307  | G | A | 0.066115703 | CTNND1  | ENST00000524630_r73 | c.799 G>A  | p.G267R  | MISSENSE |
| MA4_22R | Chr11 | 60506408  | G | A | 0.052631579 | MS4A18  | ENST00000529108_r73 | c.205 G>A  | p.A69T   | MISSENSE |
| MA4_22R | Chr11 | 62362542  | C | A | 0.114754098 | MTA2    | ENST00000278823_r73 | c.1484 G>T | p.C495F  | MISSENSE |
| MA4_22R | Chr11 | 64507168  | G | T | 0.105882353 | RASGRP2 | ENST00000394432_r73 | c.636 C>A  | p.L212L  | SILENT   |
| MA4_22R | Chr11 | 64697810  | G | A | 0.469387755 | PPP2R5B | ENST00000164133_r73 | c.739 G>A  | p.E247K  | MISSENSE |
| MA4_22R | Chr11 | 66190332  | C | T | 0.065789474 | NPAS4   | ENST00000311034_r73 | c.618 C>T  | p.G206G  | SILENT   |
| MA4_22R | Chr1  | 238045782 | C | T | 0.066115703 | ZP4     | ENST00000366570_r73 | c.1563 G>A | p.L521L  | SILENT   |
| MA4_22R | Chr1  | 241755414 | G | A | 0.087912088 | KMO     | ENST00000366559_r73 | c.1420 G>A | p.V474M  | MISSENSE |
| MA4_22R | Chr1  | 242030233 | G | C | 0.248554913 | EXO1    | ENST00000366548_r73 | c.1143 G>C | p.S381S  | SILENT   |
| MA4_22R | Chr13 | 25274920  | C | T | 0.051546392 | ATP12A  | ENST00000381946_r73 | c.1741 C>T | p.P581S  | MISSENSE |
| MA4_22R | Chr13 | 25363493  | G | C | 0.394736842 | RNF17   | ENST00000255324_r73 | c.791 G>C  | p.R264P  | MISSENSE |

Sheet1

|         |       |           |   |   |             |           |                     |                 |          |                  |
|---------|-------|-----------|---|---|-------------|-----------|---------------------|-----------------|----------|------------------|
| MA4_22R | Chr13 | 28498569  | C | T | 0.133333333 | PDX1      | ENST00000381033_r73 | c.583 C>T       | p.Q195*  | NONSENSE         |
| MA4_22R | Chr13 | 33016677  | C | T | 0.062893082 | N4BP2L2   | ENST00000399396_r73 | c.1997 G>A      | p.R666K  | MISSENSE         |
| MA4_22R | Chr13 | 39424199  | G | A | 0.180722892 | FREM2     | ENST00000280481_r73 | c.6404 G>A      | p.R2135Q | MISSENSE         |
| MA4_22R | Chr13 | 39597187  | A | T | 0.05106383  | PROSER1   | ENST00000352251_r73 | Exon 8 2 T>A    | -        | ESSENTIAL_SPLICE |
| MA4_22R | Chr13 | 46544580  | C | T | 0.051948052 | ZC3H13    | ENST00000282007_r73 | c.2489 G>A      | p.G830E  | MISSENSE         |
| MA4_22R | Chr13 | 50059823  | C | T | 0.055813954 | SETDB2    | ENST00000317257_r73 | c.1576 C>T      | p.R526*  | NONSENSE         |
| MA4_22R | Chr13 | 79191089  | G | A | 0.051136364 | RNF219    | ENST00000282003_r73 | c.807 C>T       | p.S269S  | SILENT           |
| MA4_22R | Chr13 | 80911657  | C | T | 0.105263158 | SPRY2     | ENST00000377102_r73 | c.184 G>A       | p.V62I   | MISSENSE         |
| MA4_22R | Chr13 | 103317148 | C | T | 0.376146789 | TPP2      | ENST00000376065_r73 | c.3205 C>T      | p.R1069* | NONSENSE         |
| MA4_22R | Chr13 | 103388797 | C | T | 0.050724638 | CCDC168   | ENST00000322527_r73 | c.363 G>A       | p.E121E  | SILENT           |
| MA4_22R | Chr13 | 103710650 | C | T | 0.2         | SLC10A2   | ENST00000245312_r73 | c.460 G>A       | p.D154N  | MISSENSE         |
| MA4_22R | Chr13 | 110436664 | G | A | 0.057142857 | IRS2      | ENST00000375856_r73 | c.1737 C>T      | p.T579T  | SILENT           |
| MA4_22R | Chr13 | 111927085 | A | T | 0.057692308 | ARHGGEF7  | ENST00000317133_r73 | c.1220 A>T      | p.H407L  | MISSENSE         |
| MA4_22R | Chr16 | 1536065   | C | T | 0.050847458 | PTX4      | ENST00000293922_r73 | c.1297 G>A      | p.E433K  | MISSENSE         |
| MA4_22R | Chr16 | 2293382   | G | A | 0.060240964 | ECI1      | ENST00000301729_r73 | c.500 C>T       | p.A167V  | MISSENSE         |
| MA4_22R | Chr16 | 3493148   | C | T | 0.1         | ZNF597    | ENST00000301744_r73 | c.6 G>A         | p.A2A    | SILENT           |
| MA4_22R | Chr16 | 4033331   | C | T | 0.069565217 | ADCY9     | ENST00000294016_r73 | c.2421 G>A      | p.L807L  | SILENT           |
| MA4_22R | Chr18 | 5397114   | C | G | 0.059259259 | EPB41L3   | ENST00000341928_r73 | c.2784 G>C      | p.E928D  | MISSENSE         |
| MA4_22R | Chr18 | 9221872   | A | G | 0.054054054 | ANKRD12   | ENST00000262126_r73 | c.818 A>G       | p.H273R  | MISSENSE         |
| MA4_22R | Chr18 | 21152144  | C | T | 0.05        | NPC1      | ENST00000269228_r73 | c.181 G>A       | p.E61K   | MISSENSE         |
| MA4_22R | Chr18 | 34349352  | G | A | 0.105769231 | FHOD3     | ENST00000257209_r73 | c.4200 G>A      | p.P1400P | SILENT           |
| MA4_22R | Chr18 | 34740289  | G | A | 0.089108911 | KIAA1328  | ENST00000280020_r73 | c.1359 G>A      | p.M453I  | MISSENSE         |
| MA4_22R | Chr18 | 47796189  | C | A | 0.108695652 | MBD1      | ENST00000353909_r73 | Exon 16 - 1 G>T | -        | ESSENTIAL_SPLICE |
| MA4_22R | Chr18 | 59774078  | C | T | 0.058333333 | PIGN      | ENST00000357637_r73 | c.1711 G>A      | p.G571R  | MISSENSE         |
| MA4_22R | Chr18 | 60036630  | G | A | 0.28        | TNFRSF11A | ENST00000586569_r73 | c.1480 G>A      | p.E494K  | MISSENSE         |
| MA4_22R | Chr18 | 70209141  | G | A | 0.284090909 | CBLN2     | ENST00000585159_r73 | c.255 C>T       | p.S85S   | SILENT           |
| MA4_22R | Chr16 | 11845214  | C | T | 0.068965517 | ZC3H7A    | ENST00000396516_r73 | c.2875 G>A      | p.D959N  | MISSENSE         |
| MA4_22R | Chr16 | 15692718  | C | A | 0.11627907  | KIAA0430  | ENST00000396368_r73 | c.4977 G>T      | p.E1659D | MISSENSE         |
| MA4_22R | Chr16 | 20335355  | G | A | 0.25        | GP2       | ENST00000302555_r73 | c.318 C>T       | p.T106T  | SILENT           |
| MA4_22R | Chr16 | 20362003  | G | A | 0.059701493 | UMOD      | ENST00000570689_r73 | c.57 C>T        | p.I19I   | SILENT           |
| MA4_22R | Chr16 | 22092160  | G | C | 0.058823529 | C16orf52  | ENST00000542527_r73 | c.463 G>C       | p.V155L  | MISSENSE         |
| MA4_22R | Chr16 | 30020553  | G | A | 0.098765432 | DOC2A     | ENST00000350119_r73 | c.387 C>T       | p.V129V  | SILENT           |
| MA4_22R | Chr16 | 31336632  | G | A | 0.75        | ITGAM     | ENST00000287497_r73 | c.2412 G>A      | p.V804V  | SILENT           |
| MA4_22R | Chr16 | 53358011  | G | A | 0.169811321 | CHD9      | ENST00000566029_r73 | c.7850 G>A      | p.R2617Q | MISSENSE         |
| MA4_22R | Chr16 | 69177089  | G | A | 0.056818182 | CIRH1A    | ENST00000314423_r73 | c.535 G>A       | p.V179I  | MISSENSE         |
| MA4_22R | Chr16 | 70843889  | G | A | 0.086956522 | HYDIN     | ENST00000393567_r73 | c.14680 C>T     | p.Q4894* | NONSENSE         |
| MA4_22R | Chr16 | 75575261  | C | T | 0.112676056 | TMEM231   | ENST00000258173_r73 | c.757 G>A       | p.V253M  | MISSENSE         |

Sheet1

|         |       |           |   |   |             |          |                     |        |     |          |          |
|---------|-------|-----------|---|---|-------------|----------|---------------------|--------|-----|----------|----------|
| MA4_22R | Chr16 | 79245676  | G | A | 0.0625      | WVOX     | ENST00000566780_r73 | c.1228 | G>A | p.G410S  | MISSENSE |
| MA4_22R | Chr16 | 84473064  | G | C | 0.283783784 | ATP2C2   | ENST00000262429_r73 | c.1143 | G>C | p.T381T  | SILENT   |
| MA4_22R | Chr16 | 88747917  | G | A | 0.066666667 | SNAI3    | ENST00000332281_r73 | c.282  | C>T | p.D94D   | SILENT   |
| MA4_22R | Chr16 | 89787187  | G | A | 0.192307692 | VPS9D1   | ENST00000389386_r73 | c.83   | C>T | p.T28I   | MISSENSE |
| MA4_22R | Chr6  | 8015908   | C | T | 0.050847458 | BLOC1S5  | ENST00000397457_r73 | c.538  | G>A | p.D180N  | MISSENSE |
| MA4_22R | Chr6  | 16306741  | G | A | 0.051813472 | ATXN1    | ENST00000244769_r73 | c.2267 | C>T | p.P756L  | MISSENSE |
| MA4_22R | Chr6  | 22292797  | G | C | 0.204081633 | PRL      | ENST00000306482_r73 | c.282  | C>G | p.P94P   | SILENT   |
| MA4_22R | Chr6  | 29455181  | T | C | 0.058252427 | MAS1L    | ENST00000377127_r73 | c.499  | A>G | p.I167V  | MISSENSE |
| MA4_22R | Chr6  | 43322744  | C | T | 0.097560976 | ZNF318   | ENST00000361428_r73 | c.2328 | G>A | p.P776P  | SILENT   |
| MA4_22R | Chr6  | 49518654  | C | T | 0.339622642 | C6orf141 | ENST00000414696_r73 | c.149  | C>T | p.A50V   | MISSENSE |
| MA4_22R | Chr6  | 72975190  | G | T | 0.14        | RIMS1    | ENST00000521978_r73 | c.3292 | G>T | p.D1098Y | MISSENSE |
| MA4_22R | Chr6  | 76660399  | G | A | 0.053763441 | IMPG1    | ENST00000369950_r73 | c.1704 | C>T | p.P568P  | SILENT   |
| MA4_22R | Chr6  | 102376485 | G | A | 0.057553957 | GRIK2    | ENST00000421544_r73 | c.2063 | G>A | p.G688D  | MISSENSE |
| MA4_22R | Chr6  | 109274465 | G | A | 0.068627451 | ARMC2    | ENST00000392644_r73 | c.1826 | G>A | p.R609H  | MISSENSE |
| MA4_22R | Chr6  | 112461037 | G | A | 0.062015504 | LAMA4    | ENST00000230538_r73 | c.3027 | C>T | p.A1009A | SILENT   |
| MA4_22R | Chr6  | 117859847 | G | A | 0.071942446 | DCBLD1   | ENST00000296955_r73 | c.825  | G>A | p.S275S  | SILENT   |
| MA4_22R | Chr6  | 131481326 | C | A | 0.111111111 | AKAP7    | ENST00000431975_r73 | c.279  | C>A | p.I93I   | SILENT   |
| MA4_22R | Chr6  | 131927620 | C | T | 0.061946903 | MED23    | ENST00000354577_r73 | c.1384 | G>A | p.E462K  | MISSENSE |
| MA4_22R | Chr6  | 139488186 | G | A | 0.067961165 | HECA     | ENST00000367658_r73 | c.1037 | G>A | p.R346Q  | MISSENSE |
| MA4_22R | Chr6  | 147704066 | G | A | 0.088235294 | STXBP5   | ENST00000367481_r73 | c.3238 | G>A | p.G1080S | MISSENSE |
| MA4_22R | Chr6  | 148865271 | G | A | 0.259541985 | SASH1    | ENST00000367467_r73 | c.2665 | G>A | p.D889N  | MISSENSE |
| MA4_22R | Chr6  | 151694763 | C | G | 0.3125      | ZBTB2    | ENST00000325144_r73 | c.10   | G>C | p.A4P    | MISSENSE |
| MA4_22R | Chr6  | 155450464 | A | T | 0.061068702 | TIAM2    | ENST00000461783_r73 | c.107  | A>T | p.H36L   | MISSENSE |
| MA4_22R | Chr6  | 161016412 | G | A | 0.052132701 | LPA      | ENST00000316300_r73 | c.3443 | C>T | p.P1148L | MISSENSE |
| MA4_22R | Chr6  | 165844942 | C | G | 0.052631579 | PDE10A   | ENST00000539869_r73 | c.712  | G>C | p.A238P  | MISSENSE |
| MA4_22R | ChrX  | 15593791  | C | T | 0.077777778 | ACE2     | ENST00000252519_r73 | c.1440 | G>A | p.M480I  | MISSENSE |
| MA4_22R | ChrX  | 16627715  | G | T | 0.135135135 | CTPS2    | ENST00000359276_r73 | c.1640 | C>A | p.A547E  | MISSENSE |
| MA4_22R | ChrX  | 18622441  | G | A | 0.144927536 | CDKL5    | ENST00000379996_r73 | c.1397 | G>A | p.R466Q  | MISSENSE |
| MA4_22R | ChrX  | 29301132  | G | T | 0.153061225 | IL1RAPL1 | ENST00000378993_r73 | c.160  | G>T | p.A54S   | MISSENSE |
| MA4_22R | ChrX  | 46747095  | A | T | 0.102040816 | CXorf31  | ENST00000377879_r73 | c.170  | T>A | p.V57E   | MISSENSE |
| MA4_22R | ChrX  | 48666668  | C | A | 0.123595506 | HDAC6    | ENST00000334136_r73 | c.741  | C>A | p.V247V  | SILENT   |
| MA4_22R | ChrX  | 54950100  | G | T | 0.101694915 | TRO      | ENST00000173898_r73 | c.1135 | G>T | p.E379*  | NONSENSE |
| MA4_22R | ChrX  | 54960268  | G | A | 0.710526316 | PFKFB1   | ENST00000375006_r73 | c.1342 | C>T | p.R448W  | MISSENSE |
| MA4_22R | ChrX  | 55047547  | G | A | 0.269230769 | ALAS2    | ENST00000396198_r73 | c.537  | C>T | p.S179S  | SILENT   |
| MA4_22R | ChrX  | 57021244  | C | T | 0.417582418 | SPIN3    | ENST00000374919_r73 | c.137  | G>A | p.R46Q   | MISSENSE |
| MA4_22R | ChrX  | 63411097  | G | T | 0.125       | AMER1    | ENST00000330258_r73 | c.2070 | C>A | p.S690R  | MISSENSE |
| MA4_22R | ChrX  | 69507161  | C | T | 0.727272727 | PDZD11   | ENST00000239666_r73 | c.353  | G>A | p.R118H  | MISSENSE |



Sheet1

|         |      |           |   |   |             |          |                     |              |          |                  |
|---------|------|-----------|---|---|-------------|----------|---------------------|--------------|----------|------------------|
| MA4_22R | ChrX | 70316558  | G | A | 0.1         | FOXO4    | ENST00000374259_r73 | c.180 G>A    | p.T60T   | SILENT           |
| MA4_22R | ChrX | 76890137  | G | T | 0.112781955 | ATRX     | ENST00000373344_r73 | c.4757 C>A   | p.P1586Q | MISSENSE         |
| MA4_22R | Chr3 | 11059024  | G | A | 0.072289157 | SLC6A1   | ENST00000287766_r73 | c.127 G>A    | p.D43N   | MISSENSE         |
| MA4_22R | Chr3 | 14508035  | C | T | 0.064220184 | SLC6A6   | ENST00000454876_r73 | c.744 C>T    | p.F248F  | SILENT           |
| MA4_22R | Chr3 | 19959819  | C | T | 0.057142857 | EFHB     | ENST00000295824_r73 | c.1082 G>A   | p.R361Q  | MISSENSE         |
| MA4_22R | Chr3 | 23250290  | G | C | 0.052631579 | UBE2E2   | ENST00000425792_r73 | c.100 G>C    | p.E34Q   | MISSENSE         |
| MA4_22R | Chr3 | 28365666  | C | T | 0.061068702 | AZI2     | ENST00000479665_r73 | c.1046 G>A   | p.W349*  | NONSENSE         |
| MA4_22R | Chr3 | 31710219  | C | T | 0.056701031 | OSBPL10  | ENST00000396556_r73 | c.2011 G>A   | p.E671K  | MISSENSE         |
| MA4_22R | Chr3 | 32726979  | G | A | 0.056603774 | CNOT10   | ENST00000331889_r73 | Exon 1 5 G>A | -        | ESSENTIAL_SPLICE |
| MA4_22R | ChrX | 96013231  | C | T | 0.05019305  | DIAPH2   | ENST00000373049_r73 | c.421 C>T    | p.Q141*  | NONSENSE         |
| MA4_22R | ChrX | 105167153 | A | T | 0.096491228 | NRK      | ENST00000243300_r73 | c.2654 A>T   | p.Y885F  | MISSENSE         |
| MA4_22R | ChrX | 105179175 | C | T | 0.08045977  | NRK      | ENST00000243300_r73 | c.3513 C>T   | p.F1171F | SILENT           |
| MA4_22R | ChrX | 106844025 | C | A | 0.152173913 | FRMPD3   | ENST00000439554_r73 | c.2699 C>A   | p.S900*  | NONSENSE         |
| MA4_22R | ChrX | 119670796 | G | T | 0.103448276 | CUL4B    | ENST00000371322_r73 | c.2032 C>A   | p.H678N  | MISSENSE         |
| MA4_22R | ChrX | 132161058 | G | C | 0.074766355 | USP26    | ENST00000370832_r73 | c.1191 C>G   | p.N397K  | MISSENSE         |
| MA4_22R | ChrX | 140993500 | G | A | 0.062015504 | MAGEC1   | ENST00000285879_r73 | c.310 G>A    | p.E104K  | MISSENSE         |
| MA4_22R | ChrX | 148797302 | C | T | 0.125       | MAGEA11  | ENST00000355220_r73 | c.231 C>T    | p.P77P   | SILENT           |
| MA4_22R | ChrX | 150573396 | G | T | 0.103448276 | VMA21    | ENST00000330374_r73 | c.172 G>T    | p.G58W   | MISSENSE         |
| MA4_22R | ChrX | 153171301 | C | A | 0.133333333 | AVPR2    | ENST00000358927_r73 | c.341 C>A    | p.A114D  | MISSENSE         |
| MA4_22R | Chr3 | 38318437  | C | T | 0.060606061 | SLC22A13 | ENST00000311856_r73 | c.1381 C>T   | p.R461W  | MISSENSE         |
| MA4_22R | Chr3 | 39228715  | G | C | 0.050761421 | XIRP1    | ENST00000396251_r73 | c.2222 C>G   | p.A741G  | MISSENSE         |
| MA4_22R | Chr3 | 44762890  | G | C | 0.32173913  | ZNF502   | ENST00000436624_r73 | c.581 G>C    | p.R194P  | MISSENSE         |
| MA4_22R | Chr3 | 49679891  | G | C | 0.070422535 | BSN      | ENST00000296452_r73 | c.824 G>C    | p.G275A  | MISSENSE         |
| MA4_22R | Chr3 | 49698362  | C | T | 0.345864662 | BSN      | ENST00000296452_r73 | c.9084 C>T   | p.P3028P | SILENT           |
| MA4_22R | Chr3 | 50220929  | C | T | 0.0625      | SEMA3F   | ENST00000002829_r73 | c.1165 C>T   | p.H389Y  | MISSENSE         |
| MA4_22R | Chr3 | 50418192  | G | A | 0.433333333 | CACNA2D2 | ENST00000424201_r73 | c.829 C>T    | p.R277*  | NONSENSE         |
| MA4_22R | Chr3 | 51663360  | C | T | 0.231527094 | RAD54L2  | ENST00000409535_r73 | c.352 C>T    | p.R118W  | MISSENSE         |
| MA4_22R | Chr3 | 61975389  | G | A | 0.051724138 | PTPRG    | ENST00000474889_r73 | c.281 G>A    | p.R94H   | MISSENSE         |
| MA4_22R | Chr3 | 62189178  | C | T | 0.067484663 | PTPRG    | ENST00000474889_r73 | c.1709 C>T   | p.P570L  | MISSENSE         |
| MA4_22R | Chr3 | 64589638  | A | T | 0.06097561  | ADAMTS9  | ENST00000498707_r73 | c.3707 T>A   | p.V1236E | MISSENSE         |
| MA4_22R | Chr3 | 89521697  | C | T | 0.050314465 | EPHA3    | ENST00000336596_r73 | c.2774 C>T   | p.T925I  | MISSENSE         |
| MA4_22R | Chr3 | 107799004 | G | A | 0.063583815 | CD47     | ENST00000355354_r73 | c.234 C>T    | p.P78P   | SILENT           |
| MA4_22R | Chr3 | 107799088 | G | A | 0.058139535 | CD47     | ENST00000355354_r73 | c.150 C>T    | p.N50N   | SILENT           |
| MA4_22R | Chr3 | 119666194 | C | T | 0.277227723 | GSK3B    | ENST00000264235_r73 | c.287 G>A    | p.R96Q   | MISSENSE         |
| MA4_22R | Chr3 | 122259629 | C | T | 0.054945055 | PARP9    | ENST00000477522_r73 | c.1455 G>A   | p.M485I  | MISSENSE         |
| MA4_22R | Chr3 | 128345586 | C | T | 0.051724138 | RPN1     | ENST00000296255_r73 | c.1126 G>A   | p.E376K  | MISSENSE         |
| MA4_22R | Chr3 | 130162344 | C | T | 0.055555556 | COL6A5   | ENST00000312481_r73 | c.6512 C>T   | p.P2171L | MISSENSE         |

Sheet1

|         |       |           |   |   |             |          |                     |            |          |          |
|---------|-------|-----------|---|---|-------------|----------|---------------------|------------|----------|----------|
| MA4_22R | Chr3  | 130318627 | C | T | 0.06741573  | COL6A6   | ENST00000358511_r73 | c.4626 C>T | p.P1542P | SILENT   |
| MA4_22R | Chr3  | 138762690 | C | T | 0.305785124 | PRR23C   | ENST00000413199_r73 | c.773 G>A  | p.R258H  | MISSENSE |
| MA4_22R | Chr3  | 142031593 | T | A | 0.058333333 | XRN1     | ENST00000264951_r73 | c.4665 A>T | p.I1555I | SILENT   |
| MA4_22R | Chr3  | 142537239 | T | A | 0.061728395 | PCOLCE2  | ENST00000295992_r73 | c.1186 A>T | p.I396F  | MISSENSE |
| MA4_22R | Chr3  | 142741745 | C | T | 0.068181818 | U2SURP   | ENST00000473835_r73 | c.1069 C>T | p.P357S  | MISSENSE |
| MA4_22R | Chr3  | 142741765 | A | T | 0.088235294 | U2SURP   | ENST00000473835_r73 | c.1089 A>T | p.I363I  | SILENT   |
| MA4_22R | Chr3  | 160233267 | C | T | 0.065934066 | KPNA4    | ENST00000334256_r73 | c.1005 G>A | p.L335L  | SILENT   |
| MA4_22R | Chr3  | 164714347 | C | T | 0.08411215  | SI       | ENST00000264382_r73 | c.4668 G>A | p.R1556R | SILENT   |
| MA4_22R | Chr3  | 183907373 | C | T | 0.068965517 | ABCF3    | ENST00000429586_r73 | c.1142 C>T | p.S381F  | MISSENSE |
| MA4_22R | Chr3  | 191098013 | G | A | 0.09009009  | CCDC50   | ENST00000392455_r73 | c.514 G>A  | p.E172K  | MISSENSE |
| MA4_22R | Chr3  | 195487888 | C | T | 0.063157895 | MUC4     | ENST00000349607_r73 | c.1854 G>A | p.W618*  | NONSENSE |
| MA4_22R | Chr3  | 196054298 | G | A | 0.103896104 | TM4SF19  | ENST00000442633_r73 | c.164 C>T  | p.A55V   | MISSENSE |
| MA4_22R | Chr3  | 196215543 | G | A | 0.059405941 | RNF168   | ENST00000318037_r73 | c.313 C>T  | p.Q105*  | NONSENSE |
| MA4_22R | Chr9  | 742270    | G | A | 0.059259259 | KANK1    | ENST00000382303_r73 | c.3762 G>A | p.L1254L | SILENT   |
| MA4_22R | Chr9  | 8319853   | C | T | 0.361111111 | PTPRD    | ENST00000381196_r73 | c.5648 G>A | p.R1883Q | MISSENSE |
| MA4_22R | Chr9  | 17415795  | C | T | 0.147058824 | CNTLN    | ENST00000380647_r73 | c.2806 C>T | p.H936Y  | MISSENSE |
| MA4_22R | Chr9  | 37442512  | G | A | 0.056910569 | ZBTB5    | ENST00000307750_r73 | c.37 C>T   | p.Q13*   | NONSENSE |
| MA4_22R | Chr9  | 72472880  | G | C | 0.058558559 | C9orf135 | ENST00000377197_r73 | c.436 G>C  | p.D146H  | MISSENSE |
| MA4_22R | Chr9  | 84268926  | G | A | 0.18        | TLE1     | ENST00000376499_r73 | c.260 C>T  | p.T87M   | MISSENSE |
| MA4_22R | Chr9  | 100862295 | C | T | 0.059259259 | TRIM14   | ENST00000375098_r73 | c.455 G>A  | p.R152K  | MISSENSE |
| MA4_22R | Chr9  | 101812146 | C | T | 0.06185567  | COL15A1  | ENST00000375001_r73 | c.2873 C>T | p.P958L  | MISSENSE |
| MA4_22R | Chr9  | 102861104 | G | A | 0.056074766 | ERP44    | ENST00000262455_r73 | c.19 C>T   | p.L7L    | SILENT   |
| MA4_22R | Chr9  | 111965991 | G | A | 0.062962963 | EPB41L4B | ENST00000374566_r73 | c.1898 C>T | p.P633L  | MISSENSE |
| MA4_22R | Chr9  | 112200416 | C | T | 0.273381295 | PTPN3    | ENST00000374541_r73 | c.565 G>A  | p.E189K  | MISSENSE |
| MA4_22R | Chr9  | 113265477 | G | C | 0.052173913 | SVEP1    | ENST00000401783_r73 | c.1324 C>G | p.R442G  | MISSENSE |
| MA4_22R | Chr9  | 126139223 | C | T | 0.315789474 | CRB2     | ENST00000373631_r73 | c.3740 C>T | p.A1247V | MISSENSE |
| MA4_22R | Chr12 | 2926453   | G | A | 0.173913044 | ITFG2    | ENST00000228799_r73 | c.161 G>A  | p.R54Q   | MISSENSE |
| MA4_22R | Chr12 | 7469851   | G | A | 0.162337662 | ACSM4    | ENST00000399422_r73 | c.739 G>A  | p.G247S  | MISSENSE |
| MA4_22R | Chr12 | 11138988  | A | T | 0.164874552 | TAS2R50  | ENST00000506868_r73 | c.472 T>A  | p.Y158N  | MISSENSE |
| MA4_22R | Chr12 | 23699323  | C | T | 0.064102564 | SOX5     | ENST00000546136_r73 | c.1485 G>A | p.L495L  | SILENT   |
| MA4_22R | Chr12 | 32137414  | G | A | 0.050420168 | KIAA1551 | ENST00000312561_r73 | c.3525 G>A | p.L1175L | SILENT   |
| MA4_22R | Chr12 | 49434127  | C | T | 0.066666667 | KMT2D    | ENST00000301067_r73 | c.7426 G>A | p.E2476K | MISSENSE |
| MA4_22R | Chr12 | 49580433  | G | A | 0.068376068 | TUBA1A   | ENST00000301071_r73 | c.187 C>T  | p.P63S   | MISSENSE |
| MA4_22R | Chr12 | 51213482  | G | T | 0.142857143 | ATF1     | ENST00000262053_r73 | c.736 G>T  | p.A246S  | MISSENSE |
| MA4_22R | Chr12 | 53432146  | G | A | 0.063157895 | EIF4B    | ENST00000262056_r73 | c.1527 G>A | p.G509G  | SILENT   |
| MA4_22R | Chr12 | 53701467  | G | A | 0.072289157 | AAAS     | ENST00000209873_r73 | c.1447 C>T | p.P483S  | MISSENSE |
| MA4_22R | Chr12 | 54757225  | T | A | 0.053435115 | GPR84    | ENST00000267015_r73 | c.411 A>T  | p.I137I  | SILENT   |

Sheet1

|         |       |           |   |   |             |           |                     |               |          |                  |
|---------|-------|-----------|---|---|-------------|-----------|---------------------|---------------|----------|------------------|
| MA4_22R | Chr12 | 55846797  | C | T | 0.052173913 | OR6C2     | ENST00000322678_r73 | c.800 C>T     | p.A267V  | MISSENSE         |
| MA4_22R | Chr12 | 56119655  | C | T | 0.068965517 | CD63      | ENST00000546939_r73 | c.347 G>A     | p.W116*  | NONSENSE         |
| MA4_22R | Chr9  | 130475050 | G | C | 0.063291139 | C9orf117  | ENST00000373295_r73 | c.1200 G>C    | p.M400I  | MISSENSE         |
| MA4_22R | Chr9  | 130550582 | C | A | 0.102941177 | CDK9      | ENST00000373264_r73 | c.522 C>A     | p.F174L  | MISSENSE         |
| MA4_22R | Chr9  | 130914258 | C | T | 0.060606061 | LCN2      | ENST00000373017_r73 | c.429 C>T     | p.F143F  | SILENT           |
| MA4_22R | Chr12 | 59272846  | G | A | 0.098214286 | LRIG3     | ENST00000379141_r73 | c.1663 C>T    | p.R555*  | NONSENSE         |
| MA4_22R | Chr12 | 72023451  | C | T | 0.233870968 | ZFC3H1    | ENST00000378743_r73 | c.3764 G>A    | p.R1255Q | MISSENSE         |
| MA4_22R | Chr12 | 88479826  | G | T | 0.120481928 | CEP290    | ENST00000552810_r73 | c.4427 C>A    | p.S1476* | NONSENSE         |
| MA4_22R | Chr12 | 96273421  | C | T | 0.357142857 | CCDC38    | ENST00000344280_r73 | Exon 12 1 G>A | -        | ESSENTIAL_SPLICE |
| MA4_22R | Chr12 | 110820648 | C | G | 0.068376068 | ANAPC7    | ENST00000455511_r73 | c.1037 G>C    | p.G346A  | MISSENSE         |
| MA4_22R | Chr12 | 114374833 | C | T | 0.052631579 | RBM19     | ENST00000545145_r73 | c.2047 G>A    | p.D683N  | MISSENSE         |
| MA4_22R | Chr12 | 118298167 | C | T | 0.209302326 | KSR2      | ENST00000339824_r73 | c.250 G>A     | p.A84T   | MISSENSE         |
| MA4_22R | Chr12 | 121858394 | C | T | 0.073529412 | RNF34     | ENST00000361234_r73 | c.741 C>T     | p.S247S  | SILENT           |
| MA4_22R | Chr12 | 123782540 | C | T | 0.057553957 | SBNO1     | ENST00000602750_r73 | c.4021 G>A    | p.G1341R | MISSENSE         |
| MA4_22R | Chr12 | 133389991 | G | A | 0.103448276 | GOLGA3    | ENST00000450791_r73 | c.421 C>T     | p.P141S  | MISSENSE         |
| MA4_22R | Chr14 | 23884667  | G | T | 0.133333333 | MYH7      | ENST00000355349_r73 | c.5206 C>A    | p.Q1736K | MISSENSE         |
| MA4_22R | Chr14 | 36988571  | G | A | 0.14        | NKX2-1    | ENST00000354822_r73 | c.82 C>T      | p.R28C   | MISSENSE         |
| MA4_22R | Chr14 | 45633567  | G | T | 0.190476191 | FANCM     | ENST00000267430_r73 | c.1587 G>T    | p.V529V  | SILENT           |
| MA4_22R | Chr14 | 50666444  | G | C | 0.056179775 | SOS2      | ENST00000216373_r73 | c.475 C>G     | p.Q159E  | MISSENSE         |
| MA4_22R | Chr14 | 64520254  | C | T | 0.054945055 | SYNE2     | ENST00000344113_r73 | c.9623 C>T    | p.A3208V | MISSENSE         |
| MA4_22R | Chr14 | 64892545  | G | T | 0.101449275 | MTHFD1    | ENST00000555709_r73 | c.953 G>T     | p.S318I  | MISSENSE         |
| MA4_22R | Chr14 | 70839817  | C | T | 0.294736842 | SYNJ2BP   | ENST00000256366_r73 | c.329 G>A     | p.R110Q  | MISSENSE         |
| MA4_22R | Chr14 | 75290989  | G | A | 0.056338028 | YLPM1     | ENST00000325680_r73 | c.6142 G>A    | p.D2048N | MISSENSE         |
| MA4_22R | Chr14 | 77793187  | C | T | 0.072463768 | GSTZ1     | ENST00000216465_r73 | c.74 C>T      | p.A25V   | MISSENSE         |
| MA4_22R | Chr14 | 92790184  | C | T | 0.25        | SLC24A4   | ENST00000531433_r73 | c.10 C>T      | p.R4C    | MISSENSE         |
| MA4_22R | Chr14 | 94088559  | C | T | 0.166666667 | UNC79     | ENST00000256339_r73 | c.4449 C>T    | p.S1483S | SILENT           |
| MA4_22R | Chr14 | 94395244  | G | C | 0.52631579  | FAM181A   | ENST00000557719_r73 | c.613 G>C     | p.V205L  | MISSENSE         |
| MA4_22R | Chr14 | 100193004 | C | T | 0.36        | CYP46A1   | ENST00000261835_r73 | c.1443 C>T    | p.P481P  | SILENT           |
| MA4_22R | Chr14 | 102027983 | G | A | 0.275       | DIO3      | ENST00000510508_r73 | c.150 G>A     | p.P50P   | SILENT           |
| MA4_22R | Chr14 | 104639754 | C | T | 0.294736842 | KIF26A    | ENST00000423312_r73 | c.1771 C>T    | p.R591*  | NONSENSE         |
| MA4_22R | Chr14 | 106967286 | C | T | 0.063218391 | IGHV1-46  | ENST00000390622_r73 | c.114 G>A     | p.K38K   | SILENT           |
| MA4_22R | Chr15 | 37390309  | G | A | 0.159090909 | MEIS2     | ENST00000338564_r73 | c.104 C>T     | p.P35L   | MISSENSE         |
| MA4_22R | Chr15 | 48056943  | C | T | 0.214285714 | SEMA6D    | ENST00000558014_r73 | c.1206 C>T    | p.A402A  | SILENT           |
| MA4_22R | Chr15 | 48826377  | G | C | 0.237410072 | FBN1      | ENST00000316623_r73 | c.762 C>G     | p.P254P  | SILENT           |
| MA4_22R | Chr15 | 49309166  | G | A | 0.06763285  | SECISBP2L | ENST00000559471_r73 | c.1298 C>T    | p.P433L  | MISSENSE         |
| MA4_22R | Chr15 | 56435072  | C | T | 0.085271318 | RFX7      | ENST00000559847_r73 | c.14 G>A      | p.R5Q    | MISSENSE         |
| MA4_22R | Chr15 | 56974447  | C | T | 0.138888889 | ZNF280D   | ENST00000559237_r73 | Exon 9 5 G>A  | -        | ESSENTIAL_SPLICE |

Sheet1

|         |       |           |   |   |             |          |                     |                |          |                  |
|---------|-------|-----------|---|---|-------------|----------|---------------------|----------------|----------|------------------|
| MA4_22R | Chr15 | 63991133  | C | T | 0.068181818 | HERC1    | ENST00000443617_r73 | c.4699 G>A     | p.D1567N | MISSENSE         |
| MA4_22R | Chr15 | 64427004  | G | A | 0.366666667 | SNX1     | ENST00000261889_r73 | c.1363 G>A     | p.E455K  | MISSENSE         |
| MA4_22R | Chr15 | 65255961  | C | A | 0.166666667 | SPG21    | ENST00000204566_r73 | c.927 G>T      | p.*309Y  | STOP-LOST        |
| MA4_22R | Chr15 | 65822990  | G | C | 0.071428571 | PTPLAD1  | ENST00000261875_r73 | c.21 G>C       | p.T7T    | SILENT           |
| MA4_22R | Chr15 | 66206091  | G | A | 0.212121212 | MEGF11   | ENST00000409699_r73 | c.2694 C>T     | p.T898T  | SILENT           |
| MA4_22R | Chr15 | 67681345  | G | A | 0.078947368 | IQCH     | ENST00000335894_r73 | Exon 12 1 G>A  | -        | ESSENTIAL_SPLICE |
| MA4_22R | Chr11 | 71715718  | G | T | 0.146341463 | NUMA1    | ENST00000393695_r73 | c.5974 C>A     | p.L1992I | MISSENSE         |
| MA4_22R | Chr11 | 82443907  | C | T | 0.169491525 | FAM181B  | ENST00000329203_r73 | c.865 G>A      | p.V289M  | MISSENSE         |
| MA4_22R | Chr11 | 82893483  | G | T | 0.11627907  | PCF11    | ENST00000298281_r73 | c.4366 G>T     | p.E1456* | NONSENSE         |
| MA4_22R | Chr11 | 85623719  | C | T | 0.055900621 | CCDC83   | ENST00000280245_r73 | c.822 C>T      | p.T274T  | SILENT           |
| MA4_22R | Chr11 | 110450184 | G | T | 0.108910891 | ARHGAP20 | ENST00000260283_r73 | c.3486 C>A     | p.S1162R | MISSENSE         |
| MA4_22R | Chr11 | 116707031 | C | T | 0.0625      | APOA1    | ENST00000375320_r73 | c.297 G>A      | p.L99L   | SILENT           |
| MA4_22R | Chr11 | 117985906 | C | T | 0.058394161 | TMPRSS4  | ENST00000534111_r73 | c.1057 C>T     | p.R353W  | MISSENSE         |
| MA4_22R | Chr11 | 120176362 | G | A | 0.285714286 | POU2F3   | ENST00000260264_r73 | c.643 G>A      | p.G215R  | MISSENSE         |
| MA4_22R | Chr11 | 126110873 | G | A | 0.051851852 | FAM118B  | ENST00000533050_r73 | c.273 G>A      | p.Q91Q   | SILENT           |
| MA4_22R | Chr11 | 129727330 | C | T | 0.555555556 | TMEM45B  | ENST00000281441_r73 | c.693 C>T      | p.A231A  | SILENT           |
| MA4_22R | Chr21 | 27462366  | G | A | 0.64        | APP      | ENST00000346798_r73 | c.248 C>T      | p.T83I   | MISSENSE         |
| MA4_22R | Chr21 | 41684028  | T | A | 0.081967213 | DSCAM    | ENST00000400454_r73 | c.2042 A>T     | p.Q681L  | MISSENSE         |
| MA4_22R | Chr21 | 43531640  | C | T | 0.055214724 | UMODL1   | ENST00000400427_r73 | c.2092 C>T     | p.P698S  | MISSENSE         |
| MA4_22R | Chr21 | 45089798  | G | A | 0.1         | RRP1B    | ENST00000340648_r73 | c.164 G>A      | p.W55*   | NONSENSE         |
| MA4_22R | Chr21 | 45563146  | T | A | 0.106796117 | C21orf33 | ENST00000291577_r73 | c.581 T>A      | p.V194E  | MISSENSE         |
| MA4_22R | Chr21 | 47531483  | C | T | 0.227027027 | COL6A2   | ENST00000300527_r73 | c.93 C>T       | p.T31T   | SILENT           |
| MA4_22R | Chr7  | 1785228   | C | T | 0.24516129  | ELFN1    | ENST00000424383_r73 | c.996 C>T      | p.T332T  | SILENT           |
| MA4_22R | Chr15 | 74336773  | G | A | 0.075757576 | PML      | ENST00000268058_r73 | c.2073 G>A     | p.L691L  | SILENT           |
| MA4_22R | Chr15 | 75499024  | C | T | 0.060150376 | C15orf39 | ENST00000360639_r73 | c.635 C>T      | p.P212L  | MISSENSE         |
| MA4_22R | Chr15 | 76587987  | G | A | 0.061728395 | ETFA     | ENST00000557943_r73 | c.131 C>T      | p.A44V   | MISSENSE         |
| MA4_22R | Chr15 | 84651111  | G | A | 0.051470588 | ADAMTSL3 | ENST00000286744_r73 | c.2731 G>A     | p.E911K  | MISSENSE         |
| MA4_22R | Chr15 | 89444866  | C | T | 0.097087379 | MFGE8    | ENST00000268151_r73 | c.786 G>A      | p.W262*  | NONSENSE         |
| MA4_22R | Chr15 | 91303904  | C | T | 0.051282051 | BLM      | ENST00000355112_r73 | c.1301 C>T     | p.S434L  | MISSENSE         |
| MA4_22R | Chr15 | 99701968  | G | A | 0.0625      | TTC23    | ENST00000394132_r73 | c.970 C>T      | p.L324L  | SILENT           |
| MA4_22R | Chr20 | 2097332   | G | T | 0.170731707 | STK35    | ENST00000381482_r73 | c.913 G>T      | p.A305S  | MISSENSE         |
| MA4_22R | Chr20 | 2321189   | G | A | 0.055555556 | TGM3     | ENST00000381458_r73 | c.2044 G>A     | p.A682T  | MISSENSE         |
| MA4_22R | Chr20 | 2841651   | C | T | 0.055045872 | VPS16    | ENST00000380445_r73 | c.666 C>T      | p.F222F  | SILENT           |
| MA4_22R | Chr20 | 3759095   | C | T | 0.067567568 | SPEF1    | ENST00000379756_r73 | c.576 G>A      | p.E192E  | SILENT           |
| MA4_22R | Chr20 | 5166403   | G | A | 0.051020408 | CDS2     | ENST00000460006_r73 | Exon 9 - 1 G>A | -        | ESSENTIAL_SPLICE |
| MA4_22R | Chr20 | 16387048  | C | T | 0.053475936 | KIF16B   | ENST00000354981_r73 | c.1666 G>A     | p.E556K  | MISSENSE         |
| MA4_22R | Chr20 | 25002122  | G | A | 0.607843137 | ACSS1    | ENST00000323482_r73 | c.1011 C>T     | p.I337I  | SILENT           |

Sheet1

|         |       |           |   |   |             |           |                     |            |          |          |
|---------|-------|-----------|---|---|-------------|-----------|---------------------|------------|----------|----------|
| MA4_22R | Chr20 | 31044159  | G | C | 0.065789474 | C20orf112 | ENST00000359676_r73 | c.149 C>G  | p.S50C   | MISSENSE |
| MA4_22R | Chr20 | 33519918  | G | T | 0.101010101 | GSS       | ENST00000216951_r73 | c.853 C>A  | p.L285M  | MISSENSE |
| MA4_22R | Chr20 | 35125427  | C | G | 0.095238095 | DLGAP4    | ENST00000373913_r73 | c.1968 C>G | p.P656P  | SILENT   |
| MA4_22R | Chr20 | 37137733  | A | T | 0.066455696 | RALGAPB   | ENST00000262879_r73 | c.754 A>T  | p.T252S  | MISSENSE |
| MA4_22R | Chr20 | 37137734  | C | T | 0.052307692 | RALGAPB   | ENST00000262879_r73 | c.755 C>T  | p.T252I  | MISSENSE |
| MA4_22R | Chr20 | 42907808  | G | A | 0.115789474 | GDAP1L1   | ENST00000342560_r73 | c.972 G>A  | p.S324S  | SILENT   |
| MA4_22R | Chr20 | 44180783  | C | T | 0.051792829 | WFDC8     | ENST00000357199_r73 | c.608 G>A  | p.R203H  | MISSENSE |
| MA4_22R | Chr20 | 44515285  | C | A | 0.101123596 | SPATA25   | ENST00000372519_r73 | c.555 G>T  | p.M185I  | MISSENSE |
| MA4_22R | Chr20 | 45174777  | C | A | 0.111111111 | OCSTAMP   | ENST00000279028_r73 | c.236 G>T  | p.G79V   | MISSENSE |
| MA4_22R | Chr20 | 45192082  | C | T | 0.054945055 | SLC13A3   | ENST00000279027_r73 | c.1603 G>A | p.A535T  | MISSENSE |
| MA4_22R | Chr20 | 46279756  | C | T | 0.72        | NCOA3     | ENST00000372004_r73 | c.3670 C>T | p.Q1224* | NONSENSE |
| MA4_22R | Chr20 | 52774123  | G | A | 0.057971015 | CYP24A1   | ENST00000216862_r73 | c.1238 C>T | p.T413I  | MISSENSE |
| MA4_22R | Chr20 | 57466842  | G | T | 0.103448276 | GNAS      | ENST00000371095_r73 | c.61 G>T   | p.E21*   | NONSENSE |
| MA4_22R | Chr20 | 58567563  | G | A | 0.363013699 | CDH26     | ENST00000348616_r73 | c.1414 G>A | p.A472T  | MISSENSE |
| MA4_22R | Chr20 | 61537367  | G | A | 0.082352941 | DIDO1     | ENST00000395343_r73 | c.1460 C>T | p.A487V  | MISSENSE |
| MA4_22R | Chr4  | 677412    | C | T | 0.103896104 | MFSD7     | ENST00000322224_r73 | c.979 G>A  | p.V327M  | MISSENSE |
| MA4_22R | Chr4  | 737326    | G | A | 0.06185567  | PCGF3     | ENST00000362003_r73 | c.327 G>A  | p.K109K  | SILENT   |
| MA4_22R | Chr4  | 3184176   | C | A | 0.101694915 | HTT       | ENST00000355072_r73 | c.4845 C>A | p.L1615L | SILENT   |
| MA4_22R | Chr4  | 6325146   | C | T | 0.053846154 | PPP2R2C   | ENST00000335585_r73 | c.1227 G>A | p.L409L  | SILENT   |
| MA4_22R | Chr8  | 8749575   | G | A | 0.066037736 | MFHAS1    | ENST00000276282_r73 | c.994 C>T  | p.R332C  | MISSENSE |
| MA4_22R | Chr8  | 12879165  | C | T | 0.06884058  | KIAA1456  | ENST00000524591_r73 | c.977 C>T  | p.A326V  | MISSENSE |
| MA4_22R | Chr8  | 25191643  | A | C | 0.240963855 | DOCK5     | ENST00000276440_r73 | c.2123 A>C | p.K708T  | MISSENSE |
| MA4_22R | Chr8  | 28991612  | G | C | 0.082352941 | KIF13B    | ENST00000524189_r73 | c.2729 C>G | p.S910C  | MISSENSE |
| MA4_22R | Chr8  | 33310939  | C | T | 0.223880597 | FUT10     | ENST00000327671_r73 | c.171 G>A  | p.T57T   | SILENT   |
| MA4_22R | Chr8  | 38684879  | C | T | 0.057377049 | TACC1     | ENST00000520615_r73 | c.1061 C>T | p.S354L  | MISSENSE |
| MA4_22R | Chr8  | 40683102  | G | T | 0.12962963  | ZMAT4     | ENST00000315769_r73 | c.94 C>A   | p.H32N   | MISSENSE |
| MA4_22R | Chr8  | 57354239  | G | A | 0.088328076 | PENK      | ENST00000314922_r73 | c.396 C>T  | p.L132L  | SILENT   |
| MA4_22R | Chr8  | 61767063  | C | T | 0.06097561  | CHD7      | ENST00000423902_r73 | c.6917 C>T | p.A2306V | MISSENSE |
| MA4_22R | Chr8  | 67507825  | G | T | 0.103896104 | MYBL1     | ENST00000522677_r73 | c.680 C>A  | p.P227H  | MISSENSE |
| MA4_22R | Chr8  | 94746016  | G | A | 0.271676301 | RBM12B    | ENST00000399300_r73 | c.2623 C>T | p.P875S  | MISSENSE |
| MA4_22R | Chr8  | 107726089 | C | T | 0.065573771 | OXR1      | ENST00000531443_r73 | c.1832 C>T | p.P611L  | MISSENSE |
| MA4_22R | Chr8  | 125094647 | C | T | 0.285714286 | FER1L6    | ENST00000522917_r73 | c.4339 C>T | p.R1447C | MISSENSE |
| MA4_22R | Chr8  | 143618426 | G | A | 0.4375      | BAI1      | ENST00000517894_r73 | c.3649 G>A | p.G1217S | MISSENSE |
| MA4_22R | Chr10 | 14991042  | C | G | 0.109090909 | DCLRE1C   | ENST00000378278_r73 | c.154 G>C  | p.E52Q   | MISSENSE |
| MA4_22R | Chr10 | 20335922  | C | G | 0.054421769 | PLXDC2    | ENST00000377252_r73 | c.449 C>G  | p.S150C  | MISSENSE |
| MA4_22R | Chr10 | 38246468  | C | T | 0.4         | ZNF25     | ENST00000302609_r73 | c.22 G>A   | p.V8M    | MISSENSE |
| MA4_22R | Chr10 | 46967641  | C | G | 0.121875    | SYT15     | ENST00000503753_r73 | c.436 G>C  | p.G146R  | MISSENSE |

Sheet1

|         |       |           |   |   |             |            |                     |             |          |          |
|---------|-------|-----------|---|---|-------------|------------|---------------------|-------------|----------|----------|
| MA4_22R | Chr4  | 7043158   | C | T | 0.054901961 | CCDC96     | ENST00000310085_r73 | c.1508 G>A  | p.G503D  | MISSENSE |
| MA4_22R | Chr4  | 20599961  | G | A | 0.222222222 | SLIT2      | ENST00000504154_r73 | c.3635 G>A  | p.R1212Q | MISSENSE |
| MA4_22R | Chr4  | 25418062  | A | T | 0.05982906  | ANAPC4     | ENST00000315368_r73 | c.1917 A>T  | p.L639F  | MISSENSE |
| MA4_22R | Chr4  | 39515714  | C | T | 0.0875      | UGDH       | ENST00000316423_r73 | c.253 G>A   | p.V85I   | MISSENSE |
| MA4_22R | Chr4  | 48517088  | C | T | 0.063063063 | FRYL       | ENST00000503238_r73 | c.7894 G>A  | p.E2632K | MISSENSE |
| MA4_22R | Chr4  | 53610954  | C | T | 0.051724138 | ERVMER34-1 | ENST00000443173_r73 | c.734 G>A   | p.R245H  | MISSENSE |
| MA4_22R | Chr4  | 54348015  | C | T | 0.054545455 | LNX1       | ENST00000306888_r73 | c.1069 G>A  | p.E357K  | MISSENSE |
| MA4_22R | Chr4  | 56322146  | C | T | 0.097222222 | CLOCK      | ENST00000309964_r73 | c.900 G>A   | p.L300L  | SILENT   |
| MA4_22R | Chr4  | 57798031  | C | G | 0.055214724 | REST       | ENST00000309042_r73 | c.3007 C>G  | p.Q1003E | MISSENSE |
| MA4_22R | Chr4  | 70078419  | C | A | 0.127272727 | UGT2B11    | ENST00000446444_r73 | c.742 G>T   | p.E248*  | NONSENSE |
| MA4_22R | Chr4  | 70723328  | T | G | 0.307692308 | SULT1E1    | ENST00000226444_r73 | c.35 A>C    | p.E12A   | MISSENSE |
| MA4_22R | Chr4  | 71701903  | A | T | 0.245901639 | GRSF1      | ENST00000254799_r73 | c.486 T>A   | p.T162T  | SILENT   |
| MA4_22R | Chr4  | 85656218  | G | T | 0.102040816 | WDFY3      | ENST00000295888_r73 | c.6971 C>A  | p.T2324K | MISSENSE |
| MA4_22R | Chr4  | 88987031  | G | A | 0.058139535 | PKD2       | ENST00000237596_r73 | c.2358 G>A  | p.R786R  | SILENT   |
| MA4_22R | Chr4  | 90856145  | A | T | 0.058536585 | MMRN1      | ENST00000394980_r73 | c.1314 A>T  | p.A438A  | SILENT   |
| MA4_22R | Chr4  | 100532313 | C | T | 0.321428571 | MTTP       | ENST00000265517_r73 | c.1783 C>T  | p.R595*  | NONSENSE |
| MA4_22R | Chr4  | 110670734 | A | G | 0.072072072 | CFI        | ENST00000394634_r73 | c.965 T>C   | p.L322S  | MISSENSE |
| MA4_22R | Chr4  | 113541204 | C | T | 0.061728395 | C4orf21    | ENST00000505019_r73 | c.305 G>A   | p.G102D  | MISSENSE |
| MA4_22R | Chr4  | 123280818 | T | A | 0.065217391 | KIAA1109   | ENST00000264501_r73 | c.14742 T>A | p.Y4914* | NONSENSE |
| MA4_22R | Chr4  | 124323268 | G | A | 0.111111111 | SPRY1      | ENST00000339241_r73 | c.522 G>A   | p.L174L  | SILENT   |
| MA4_22R | Chr4  | 129812279 | G | A | 0.060606061 | SCLT1      | ENST00000281142_r73 | c.1843 C>T  | p.R615*  | NONSENSE |
| MA4_22R | Chr4  | 148595015 | T | A | 0.050761421 | PRMT10     | ENST00000322396_r73 | c.349 A>T   | p.R117W  | MISSENSE |
| MA4_22R | Chr4  | 148653548 | C | T | 0.060301508 | ARHGAP10   | ENST00000336498_r73 | c.96 C>T    | p.T32T   | SILENT   |
| MA4_22R | Chr4  | 153247366 | C | T | 0.351851852 | FBXW7      | ENST00000281708_r73 | c.1436 G>A  | p.R479Q  | MISSENSE |
| MA4_22R | Chr4  | 186560180 | G | A | 0.076923077 | SORBS2     | ENST00000437304_r73 | c.1231 C>T  | p.P411S  | MISSENSE |
| MA4_22R | Chr10 | 50151445  | A | T | 0.070422535 | WDFY4      | ENST00000325239_r73 | c.7700 A>T  | p.Y2567F | MISSENSE |
| MA4_22R | Chr10 | 65379496  | C | G | 0.057777778 | REEP3      | ENST00000373758_r73 | c.647 C>G   | p.T216R  | MISSENSE |
| MA4_22R | Chr10 | 69961725  | C | G | 0.053097345 | MYPN       | ENST00000358913_r73 | c.3633 C>G  | p.T1211T | SILENT   |
| MA4_22R | Chr10 | 70243256  | C | T | 0.051282051 | SLC25A16   | ENST00000265870_r73 | c.932 G>A   | p.C311Y  | MISSENSE |
| MA4_22R | Chr10 | 74953307  | C | G | 0.344262295 | FAM149B1   | ENST00000242505_r73 | c.498 C>G   | p.S166S  | SILENT   |
| MA4_22R | Chr10 | 75283499  | A | T | 0.054945055 | USP54      | ENST00000339859_r73 | c.2204 T>A  | p.I735K  | MISSENSE |
| MA4_22R | Chr10 | 88703086  | G | A | 0.059782609 | MMRN2      | ENST00000372027_r73 | c.1455 C>T  | p.L485L  | SILENT   |
| MA4_22R | Chr10 | 96341107  | G | T | 0.11627907  | HELLS      | ENST00000348459_r73 | c.1057 G>T  | p.V353L  | MISSENSE |
| MA4_22R | Chr10 | 101590588 | G | A | 0.06741573  | ABCC2      | ENST00000370449_r73 | c.2863 G>A  | p.E955K  | MISSENSE |
| MA4_22R | Chr10 | 102763678 | C | T | 0.179775281 | LZTS2      | ENST00000370223_r73 | c.823 C>T   | p.R275W  | MISSENSE |
| MA4_22R | Chr10 | 105798871 | C | T | 0.25        | COL17A1    | ENST00000353479_r73 | c.2905 G>A  | p.G969S  | MISSENSE |
| MA4_22R | Chr10 | 111881968 | G | A | 0.052287582 | ADD3       | ENST00000360162_r73 | c.1061 G>A  | p.G354E  | MISSENSE |

Sheet1

|         |       |           |   |   |             |          |                     |              |          |                  |
|---------|-------|-----------|---|---|-------------|----------|---------------------|--------------|----------|------------------|
| MA4_22R | Chr10 | 124895854 | T | C | 0.05982906  | HMX3     | ENST00000357878_r73 | c.288 T>C    | p.F96F   | SILENT           |
| MA4_22R | Chr10 | 129913861 | C | T | 0.194331984 | MKI67    | ENST00000368654_r73 | c.811 G>A    | p.A271T  | MISSENSE         |
| MA4_22R | Chr10 | 131958338 | G | T | 0.108695652 | GLRX3    | ENST00000331244_r73 | Exon 3 5 G>T | -        | ESSENTIAL_SPLICE |
| MA4_22R | Chr19 | 1005543   | C | T | 0.415384615 | GRIN3B   | ENST00000234389_r73 | c.2043 C>T   | p.H681H  | SILENT           |
| MA4_22R | Chr19 | 2114166   | C | T | 0.053811659 | AP3D1    | ENST00000355272_r73 | c.2559 G>A   | p.E853E  | SILENT           |
| MA4_22R | Chr19 | 2291521   | C | T | 0.096774194 | LINGO3   | ENST00000585527_r73 | c.255 G>A    | p.L85L   | SILENT           |
| MA4_22R | Chr19 | 3542962   | C | T | 0.063829787 | MFSD12   | ENST00000398558_r73 | c.1434 G>A   | p.W478*  | NONSENSE         |
| MA4_22R | Chr19 | 5211657   | G | C | 0.05        | PTPRS    | ENST00000587303_r73 | c.5178 C>G   | p.P1726P | SILENT           |
| MA4_22R | Chr19 | 11976988  | C | G | 0.056603774 | ZNF439   | ENST00000304030_r73 | c.17 C>G     | p.P6R    | MISSENSE         |
| MA4_22R | Chr19 | 14066781  | G | A | 0.25        | DCAF15   | ENST00000254337_r73 | c.424 G>A    | p.V142I  | MISSENSE         |
| MA4_22R | Chr19 | 16957871  | G | A | 0.073684211 | SIN3B    | ENST00000379803_r73 | c.673 G>A    | p.E225K  | MISSENSE         |
| MA4_22R | Chr19 | 19751255  | C | T | 0.068376068 | GMIP     | ENST00000203556_r73 | c.364 G>A    | p.E122K  | MISSENSE         |
| MA4_22R | Chr19 | 33600873  | G | A | 0.085714286 | GPATCH1  | ENST00000170564_r73 | c.1536 G>A   | p.K512K  | SILENT           |
| MA4_22R | Chr19 | 35610320  | G | T | 0.139534884 | FXVD3    | ENST00000604404_r73 | c.40 G>T     | p.G14C   | MISSENSE         |
| MA4_22R | Chr19 | 37240210  | G | C | 0.059405941 | ZNF850   | ENST00000591344_r73 | c.1732 C>G   | p.Q578E  | MISSENSE         |
| MA4_22R | Chr19 | 39364604  | G | A | 0.102941177 | RINL     | ENST00000591812_r73 | c.235 C>T    | p.P79S   | MISSENSE         |
| MA4_22R | Chr19 | 40842060  | T | A | 0.058823529 | C19orf47 | ENST00000582783_r73 | c.290 A>T    | p.D97V   | MISSENSE         |
| MA4_22R | Chr19 | 41779891  | C | T | 0.432432432 | HNRNPUL1 | ENST00000595018_r73 | c.277 C>T    | p.R93C   | MISSENSE         |
| MA4_22R | Chr19 | 46417691  | C | T | 0.087301587 | NANOS2   | ENST00000341294_r73 | c.261 G>A    | p.V87V   | SILENT           |
| MA4_22R | Chr19 | 48801484  | C | A | 0.110091743 | CCDC114  | ENST00000315396_r73 | c.1243 G>T   | p.E415*  | NONSENSE         |
| MA4_22R | Chr19 | 55994493  | G | A | 0.085714286 | ZNF628   | ENST00000598519_r73 | c.1933 G>A   | p.A645T  | MISSENSE         |
| MA4_22R | Chr19 | 56243463  | C | T | 0.081395349 | NLRP9    | ENST00000332836_r73 | c.1734 G>A   | p.L578L  | SILENT           |
| MA4_22R | Chr19 | 58989159  | G | T | 0.101265823 | ZNF446   | ENST00000594369_r73 | c.498 G>T    | p.V166V  | SILENT           |
| MA4_22R | Chr5  | 1280309   | G | A | 0.30075188  | TERT     | ENST00000310581_r73 | c.1914 C>T   | p.Y638Y  | SILENT           |
| MA4_22R | Chr5  | 31318018  | C | T | 0.19        | CDH6     | ENST00000265071_r73 | c.1869 C>T   | p.I623I  | SILENT           |
| MA4_22R | Chr5  | 41911179  | G | A | 0.097560976 | C5orf51  | ENST00000381647_r73 | c.384 G>A    | p.L128L  | SILENT           |
| MA4_22R | Chr5  | 53815413  | G | A | 0.051136364 | SNX18    | ENST00000343017_r73 | c.1631 G>A   | p.W544*  | NONSENSE         |
| MA4_22R | Chr5  | 64492932  | G | A | 0.052173913 | ADAMTS6  | ENST00000381055_r73 | c.2622 C>T   | p.S874S  | SILENT           |
| MA4_22R | Chr5  | 74026094  | G | A | 0.2125      | GFM2     | ENST00000296805_r73 | c.1717 C>T   | p.R573C  | MISSENSE         |
| MA4_22R | Chr5  | 75914346  | G | A | 0.05        | F2RL2    | ENST00000296641_r73 | c.186 C>T    | p.A62A   | SILENT           |
| MA4_22R | Chr5  | 96341909  | A | T | 0.096774194 | LNPEP    | ENST00000231368_r73 | c.1918 A>T   | p.K640*  | NONSENSE         |
| MA4_22R | Chr5  | 118483009 | C | G | 0.052631579 | DMXL1    | ENST00000311085_r73 | c.2755 C>G   | p.P919A  | MISSENSE         |
| MA4_22R | Chr5  | 124036904 | G | C | 0.052083333 | ZNF608   | ENST00000306315_r73 | c.965 C>G    | p.P322R  | MISSENSE         |
| MA4_22R | Chr5  | 137727662 | G | A | 0.052631579 | KDM3B    | ENST00000314358_r73 | c.2341 G>A   | p.A781T  | MISSENSE         |
| MA4_22R | Chr5  | 140176813 | G | A | 0.128205128 | PCDHA2   | ENST00000526136_r73 | c.2264 G>A   | p.R755Q  | MISSENSE         |
| MA4_22R | Chr5  | 140215289 | G | A | 0.339622642 | PCDHA7   | ENST00000525929_r73 | c.1321 G>A   | p.V441M  | MISSENSE         |
| MA4_22R | Chr5  | 140750726 | G | A | 0.051546392 | PCDHGB3  | ENST00000576222_r73 | c.765 G>A    | p.L255L  | SILENT           |

Sheet1

|         |      |           |   |   |             |          |                     |             |          |          |
|---------|------|-----------|---|---|-------------|----------|---------------------|-------------|----------|----------|
| MA4_22R | Chr5 | 148407426 | C | T | 0.090909091 | SH3TC2   | ENST00000515425_r73 | c.1869 G>A  | p.G623G  | SILENT   |
| MA4_22R | Chr5 | 149417020 | G | C | 0.285714286 | HMGXB3   | ENST00000502717_r73 | c.2343 G>C  | p.V781V  | SILENT   |
| MA4_22R | Chr5 | 149495412 | G | T | 0.12962963  | PDGFRB   | ENST00000261799_r73 | c.3235 C>A  | p.Q1079K | MISSENSE |
| MA4_22R | Chr5 | 157053387 | A | T | 0.067961165 | SOX30    | ENST00000265007_r73 | c.2223 T>A  | p.S741R  | MISSENSE |
| MA4_22R | Chr5 | 170827164 | G | A | 0.075268817 | NPM1     | ENST00000517671_r73 | c.532 G>A   | p.D178N  | MISSENSE |
| MA4_22R | Chr5 | 176823783 | G | A | 0.051546392 | SLC34A1  | ENST00000324417_r73 | c.1224 G>A  | p.V408V  | SILENT   |
| MA4_22R | Chr5 | 176827505 | G | A | 0.063829787 | PFN3     | ENST00000358571_r73 | c.73 C>T    | p.H25Y   | MISSENSE |
| MA4_22R | Chr5 | 180552290 | C | T | 0.050505051 | OR2V1    | ENST00000329365_r73 | c.15 G>A    | p.V5V    | SILENT   |
| MA4_22R | Chr7 | 44714066  | G | A | 0.114754098 | OGDH     | ENST00000443864_r73 | c.845 G>A   | p.G282D  | MISSENSE |
| MA4_22R | Chr7 | 48314009  | C | T | 0.063157895 | ABCA13   | ENST00000435803_r73 | c.4746 C>T  | p.A1582A | SILENT   |
| MA4_22R | Chr7 | 56119600  | T | A | 0.078651685 | CCT6A    | ENST00000275603_r73 | c.59 T>A    | p.L20Q   | MISSENSE |
| MA4_22R | Chr7 | 72718795  | G | A | 0.113636364 | NSUN5    | ENST00000428206_r73 | c.590 C>T   | p.A197V  | MISSENSE |
| MA4_22R | Chr7 | 75051365  | G | A | 0.161290323 | POM121C  | ENST00000453279_r73 | c.2170 C>T  | p.P724S  | MISSENSE |
| MA4_22R | Chr7 | 76952988  | C | T | 0.052238806 | GSAP     | ENST00000257626_r73 | c.1899 G>A  | p.M633I  | MISSENSE |
| MA4_22R | Chr7 | 81964550  | T | C | 0.095238095 | CACNA2D1 | ENST00000356860_r73 | c.195 A>G   | p.Q65Q   | SILENT   |
| MA4_22R | Chr7 | 83634702  | C | T | 0.115853659 | SEMA3A   | ENST00000265362_r73 | c.1313 G>A  | p.R438Q  | MISSENSE |
| MA4_22R | Chr7 | 86823157  | G | A | 0.05        | DMTF1    | ENST00000331242_r73 | c.1767 G>A  | p.L589L  | SILENT   |
| MA4_22R | Chr7 | 87195400  | C | T | 0.05        | ABCB1    | ENST00000265724_r73 | c.688 G>A   | p.A230T  | MISSENSE |
| MA4_22R | Chr7 | 89856763  | C | G | 0.25        | STEAP2   | ENST00000287908_r73 | c.971 C>G   | p.P324R  | MISSENSE |
| MA4_22R | Chr7 | 93055777  | G | T | 0.10619469  | CALCR    | ENST00000394441_r73 | c.1316 C>A  | p.P439Q  | MISSENSE |
| MA4_22R | Chr7 | 97847329  | G | T | 0.107142857 | TECPR1   | ENST00000447648_r73 | c.3183 C>A  | p.I1061I | SILENT   |
| MA4_22R | Chr7 | 98957229  | C | T | 0.077586207 | ARPC1A   | ENST00000262942_r73 | c.851 C>T   | p.S284F  | MISSENSE |
| MA4_22R | Chr7 | 99711864  | T | A | 0.074324324 | TAF6     | ENST00000437822_r73 | c.80 A>T    | p.H27L   | MISSENSE |
| MA4_22R | Chr7 | 121651144 | C | T | 0.06918239  | PTPRZ1   | ENST00000393386_r73 | c.2044 C>T  | p.R682C  | MISSENSE |
| MA4_22R | Chr7 | 124503458 | C | T | 0.052083333 | POT1     | ENST00000357628_r73 | c.492 G>A   | p.L164L  | SILENT   |
| MA4_22R | Chr7 | 128415200 | T | A | 0.1         | OPN1SW   | ENST00000249389_r73 | c.361 A>T   | p.T121S  | MISSENSE |
| MA4_22R | Chr7 | 132973690 | G | T | 0.108695652 | EXOC4    | ENST00000393161_r73 | c.291 G>T   | p.L97L   | SILENT   |
| MA4_22R | Chr7 | 144095425 | G | T | 0.103092784 | NOBOX    | ENST00000483238_r73 | c.1628 C>A  | p.P543Q  | MISSENSE |
| MA4_22R | Chr7 | 150779363 | C | T | 0.053571429 | TMUB1    | ENST00000297533_r73 | c.288 G>A   | p.P96P   | SILENT   |
| MA4_22R | Chr2 | 9580763   | C | A | 0.111111111 | CPSF3    | ENST00000238112_r73 | c.904 C>A   | p.P302T  | MISSENSE |
| MA4_22R | Chr2 | 15644291  | T | A | 0.059288538 | NBAS     | ENST00000281513_r73 | c.932 A>T   | p.Y311F  | MISSENSE |
| MA4_22R | Chr2 | 23785338  | C | T | 0.5         | KLHL29   | ENST00000486442_r73 | c.272 C>T   | p.A91V   | MISSENSE |
| MA4_22R | Chr2 | 31570446  | G | A | 0.538461539 | XDH      | ENST00000379416_r73 | c.3218 C>T  | p.P1073L | MISSENSE |
| MA4_22R | Chr2 | 32828115  | G | T | 0.13559322  | BIRC6    | ENST00000421745_r73 | c.14035 G>T | p.E4679* | NONSENSE |
| MA4_22R | Chr2 | 43924331  | C | T | 0.055555556 | PLEKHH2  | ENST00000282406_r73 | c.524 C>T   | p.S175F  | MISSENSE |
| MA4_22R | Chr2 | 48602394  | C | T | 0.057471264 | FOXN2    | ENST00000340553_r73 | c.1108 C>T  | p.Q370*  | NONSENSE |
| MA4_22R | Chr2 | 49295382  | G | A | 0.095238095 | FSHR     | ENST00000406846_r73 | c.200 C>T   | p.S67L   | MISSENSE |



Sheet1

|         |      |           |   |   |             |              |                     |              |           |                  |
|---------|------|-----------|---|---|-------------|--------------|---------------------|--------------|-----------|------------------|
| MA4_22R | Chr2 | 54148234  | C | T | 0.678571429 | PSME4        | ENST00000404125_r73 | c.2054 G>A   | p.R685Q   | MISSENSE         |
| MA4_22R | Chr2 | 55096480  | G | T | 0.115384615 | EML6         | ENST00000356458_r73 | c.2214 G>T   | p.V738V   | SILENT           |
| MA4_22R | Chr2 | 55566693  | G | C | 0.10619469  | CCDC88A      | ENST00000336838_r73 | c.1425 C>G   | p.T475T   | SILENT           |
| MA4_22R | Chr2 | 56145080  | G | C | 0.054545455 | EFEMP1       | ENST00000394555_r73 | c.237 C>G    | p.V79V    | SILENT           |
| MA4_22R | Chr2 | 61541776  | C | T | 0.054794521 | USP34        | ENST00000398571_r73 | c.3486 G>A   | p.M1162I  | MISSENSE         |
| MA4_22R | Chr2 | 70486562  | G | T | 0.106382979 | PCYOX1       | ENST00000433351_r73 | c.183 G>T    | p.V61V    | SILENT           |
| MA4_22R | Chr2 | 71631089  | A | T | 0.05511811  | ZNF638       | ENST00000264447_r73 | c.2919 A>T   | p.S973S   | SILENT           |
| MA4_22R | Chr2 | 73989867  | G | T | 0.118644068 | DUSP11       | ENST00000272444_r73 | c.1055 C>A   | p.A352E   | MISSENSE         |
| MA4_22R | Chr2 | 74709640  | G | A | 0.068181818 | CCDC142      | ENST00000290418_r73 | c.325 C>T    | p.R109*   | NONSENSE         |
| MA4_22R | Chr2 | 74902895  | C | T | 0.059405941 | SEMA4F       | ENST00000357877_r73 | c.1502 C>T   | p.S501F   | MISSENSE         |
| MA4_22R | Chr2 | 84774741  | G | A | 0.056962025 | DNAH6        | ENST00000237449_r73 | Exon 6 5 G>A | -         | ESSENTIAL_SPLICE |
| MA4_22R | Chr2 | 86847448  | C | T | 0.049586777 | CHMP3        | ENST00000439940_r73 | Exon 3 5 G>A | -         | ESSENTIAL_SPLICE |
| MA4_22R | Chr2 | 86847448  | C | T | 0.049586777 | RNF103-CHMP3 | ENST00000604011_r73 | Exon 3 5 G>A | -         | ESSENTIAL_SPLICE |
| MA4_22R | Chr2 | 86847448  | C | T | 0.049586777 | RNF103       | ENST00000237455_r73 | Exon 2 5 G>A | -         | ESSENTIAL_SPLICE |
| MA4_22R | Chr2 | 86847448  | C | T | 0.049586777 | CHMP3        | ENST00000439940_r73 | Exon 3 5 G>A | -         | ESSENTIAL_SPLICE |
| MA4_22R | Chr2 | 87017571  | C | T | 0.265151515 | CD8A         | ENST00000352580_r73 | c.283 G>A    | p.G95R    | MISSENSE         |
| MA4_22R | Chr2 | 88387471  | C | T | 0.386363636 | SMYD1        | ENST00000419482_r73 | c.405 C>T    | p.H135H   | SILENT           |
| MA4_22R | Chr2 | 102793049 | C | T | 0.248275862 | IL1R1        | ENST00000410023_r73 | c.1540 C>T   | p.R514C   | MISSENSE         |
| MA4_22R | Chr2 | 105473338 | G | A | 0.294797688 | POU3F3       | ENST00000361360_r73 | c.1370 G>A   | p.R457Q   | MISSENSE         |
| MA4_22R | Chr2 | 128339485 | G | A | 0.27027027  | MYO7B        | ENST00000409816_r73 | c.1100 G>A   | p.R367Q   | MISSENSE         |
| MA4_22R | Chr2 | 130910208 | G | T | 0.12195122  | SMPD4        | ENST00000351288_r73 | c.2434 C>A   | p.L812M   | MISSENSE         |
| MA4_22R | Chr2 | 133618104 | G | A | 0.050632911 | NCKAP5       | ENST00000409261_r73 | c.768 C>T    | p.F256F   | SILENT           |
| MA4_22R | Chr2 | 135308203 | C | T | 0.317460318 | TMEM163      | ENST00000281924_r73 | c.396 G>A    | p.S132S   | SILENT           |
| MA4_22R | Chr2 | 160801458 | G | A | 0.079096045 | PLA2R1       | ENST00000283243_r73 | c.4103 C>T   | p.P1368L  | MISSENSE         |
| MA4_22R | Chr2 | 162280208 | G | A | 0.34        | TBR1         | ENST00000389554_r73 | c.1519 G>A   | p.A507T   | MISSENSE         |
| MA4_22R | Chr2 | 167108340 | C | T | 0.061728395 | SCN9A        | ENST00000409672_r73 | c.3374 G>A   | p.G1125E  | MISSENSE         |
| MA4_22R | Chr2 | 171055777 | C | T | 0.061068702 | MYO3B        | ENST00000409044_r73 | c.62 C>T     | p.P21L    | MISSENSE         |
| MA4_22R | Chr2 | 179429213 | G | A | 0.314285714 | TTN          | ENST00000342992_r73 | c.73942 C>T  | p.R24648C | MISSENSE         |
| MA4_22R | Chr2 | 179480116 | G | A | 0.067039106 | TTN          | ENST00000342992_r73 | c.40852 C>T  | p.R13618C | MISSENSE         |
| MA4_22R | Chr2 | 190436555 | T | G | 0.055555556 | SLC40A1      | ENST00000261024_r73 | c.400 A>C    | p.I134L   | MISSENSE         |
| MA4_22R | Chr2 | 192255067 | C | T | 0.05952381  | MYO1B        | ENST00000339514_r73 | c.1831 C>T   | p.L611L   | SILENT           |
| MA4_22R | Chr2 | 198570371 | C | T | 0.056074766 | MARS2        | ENST00000282276_r73 | c.242 C>T    | p.P81L    | MISSENSE         |
| MA4_22R | Chr2 | 202248908 | C | T | 0.256281407 | TRAK2        | ENST00000332624_r73 | c.1995 G>A   | p.S665S   | SILENT           |
| MA4_22R | Chr2 | 204009852 | G | A | 0.06993007  | NBEAL1       | ENST00000449802_r73 | c.5186 G>A   | p.R1729Q  | MISSENSE         |
| MA4_22R | Chr2 | 206588620 | G | A | 0.063063063 | NRP2         | ENST00000360409_r73 | c.776 G>A    | p.G259D   | MISSENSE         |
| MA4_22R | Chr2 | 210561752 | C | T | 0.103448276 | MAP2         | ENST00000360351_r73 | c.4499 C>T   | p.S1500F  | MISSENSE         |
| MA4_22R | Chr2 | 215976355 | G | T | 0.108695652 | ABCA12       | ENST00000272895_r73 | c.128 C>A    | p.T43N    | MISSENSE         |

Sheet1

|         |       |           |   |   |             |          |                     |                |          |                  |
|---------|-------|-----------|---|---|-------------|----------|---------------------|----------------|----------|------------------|
| MA4_22R | Chr2  | 219487531 | G | A | 0.057692308 | PLCD4    | ENST00000450993_r73 | c.702 G>A      | p.E234E  | SILENT           |
| MA4_22R | Chr2  | 220112400 | G | A | 0.284671533 | STK16    | ENST00000409638_r73 | c.578 G>A      | p.R193Q  | MISSENSE         |
| MA4_22R | Chr2  | 220478944 | C | A | 0.157894737 | STK111P  | ENST00000295641_r73 | c.2811 C>A     | p.V937V  | SILENT           |
| MA4_22R | Chr2  | 223478577 | A | T | 0.081081081 | FARSB    | ENST00000281828_r73 | c.1415 T>A     | p.L472Q  | MISSENSE         |
| MA4_22R | Chr17 | 3030327   | C | G | 0.112359551 | OR1G1    | ENST00000328890_r73 | c.519 G>C      | p.E173D  | MISSENSE         |
| MA4_22R | Chr17 | 5358516   | C | T | 0.076271186 | DHX33    | ENST00000225296_r73 | c.1111 G>A     | p.D371N  | MISSENSE         |
| MA4_22R | Chr17 | 10317560  | C | T | 0.054054054 | MYH8     | ENST00000403437_r73 | c.957 G>A      | p.G319G  | SILENT           |
| MA4_22R | Chr17 | 10451131  | G | A | 0.051851852 | MYH2     | ENST00000245503_r73 | c.107 C>T      | p.T36I   | MISSENSE         |
| MA4_22R | Chr17 | 19186759  | C | T | 0.05027933  | EPN2     | ENST00000314728_r73 | c.327 C>T      | p.F109F  | SILENT           |
| MA4_22R | Chr17 | 28384857  | T | A | 0.050314465 | EFCAB5   | ENST00000536908_r73 | c.2361 T>A     | p.F787L  | MISSENSE         |
| MA4_22R | Chr17 | 31355390  | C | T | 0.342857143 | ASIC2    | ENST00000225823_r73 | c.1008 G>A     | p.P336P  | SILENT           |
| MA4_22R | Chr17 | 34867273  | G | A | 0.101449275 | MYO19    | ENST00000431794_r73 | c.916 C>T      | p.L306F  | MISSENSE         |
| MA4_22R | Chr17 | 35880734  | C | G | 0.071428571 | SYNRG    | ENST00000339208_r73 | c.3684 G>C     | p.L1228L | SILENT           |
| MA4_22R | Chr17 | 38711651  | C | T | 0.076923077 | CCR7     | ENST00000246657_r73 | c.480 G>A      | p.Q160Q  | SILENT           |
| MA4_22R | Chr17 | 38927490  | T | A | 0.071428571 | KRT26    | ENST00000335552_r73 | Exon 2 - 2 A>T | -        | ESSENTIAL_SPLICE |
| MA4_22R | Chr17 | 39975865  | G | A | 0.074534162 | FKBP10   | ENST00000321562_r73 | c.1001 G>A     | p.C334Y  | MISSENSE         |
| MA4_22R | Chr17 | 39992198  | C | T | 0.066037736 | NT5C3B   | ENST00000435506_r73 | c.24 G>A       | p.L8L    | SILENT           |
| MA4_22R | Chr2  | 239353004 | C | T | 0.068181818 | ASB1     | ENST00000264607_r73 | c.516 C>T      | p.V172V  | SILENT           |
| MA4_22R | Chr2  | 241817491 | G | T | 0.103092784 | AGXT     | ENST00000307503_r73 | c.995 G>T      | p.W332L  | MISSENSE         |
| MA4_22R | Chr17 | 41598785  | G | T | 0.150943396 | DHX8     | ENST00000262415_r73 | c.3115 G>T     | p.E1039* | NONSENSE         |
| MA4_22R | Chr17 | 44109023  | G | A | 0.115942029 | KANSL1   | ENST00000574590_r73 | c.3137 C>T     | p.P1046L | MISSENSE         |
| MA4_22R | Chr17 | 46628451  | T | C | 0.666666667 | HOXB3    | ENST00000470495_r73 | c.541 A>G      | p.S181G  | MISSENSE         |
| MA4_22R | Chr17 | 48245917  | G | A | 0.074766355 | SGCA     | ENST00000344627_r73 | c.568 G>A      | p.E190K  | MISSENSE         |
| MA4_22R | Chr17 | 57644084  | C | A | 0.14893617  | DHX40    | ENST00000251241_r73 | c.209 C>A      | p.S70*   | NONSENSE         |
| MA4_22R | Chr17 | 58286188  | G | A | 0.064220184 | USP32    | ENST00000300896_r73 | c.2600 C>T     | p.A867V  | MISSENSE         |
| MA4_22R | Chr17 | 63537574  | G | A | 0.12244898  | AXIN2    | ENST00000307078_r73 | c.1058 C>T     | p.P353L  | MISSENSE         |
| MA4_22R | Chr17 | 73488684  | C | T | 0.059602649 | KIAA0195 | ENST00000314256_r73 | c.1726 C>T     | p.Q576*  | NONSENSE         |
| MA4_22R | Chr17 | 73520492  | G | A | 0.071428571 | TSEN54   | ENST00000333213_r73 | c.1580 G>A     | p.*527*  | SILENT           |
| MA4_22R | Chr17 | 74283314  | C | T | 0.073770492 | QRICH2   | ENST00000262765_r73 | c.3472 G>A     | p.E1158K | MISSENSE         |
| MA4_22R | Chr17 | 74865120  | C | T | 0.0625      | MGAT5B   | ENST00000301618_r73 | c.9 C>T        | p.T3T    | SILENT           |
| MA4_22R | Chr22 | 17669257  | C | T | 0.058252427 | CECR1    | ENST00000399839_r73 | c.1053 G>A     | p.L351L  | SILENT           |
| MA4_22R | Chr22 | 21119138  | T | A | 0.063063063 | PI4KA    | ENST00000255882_r73 | c.2675 A>T     | p.Y892F  | MISSENSE         |
| MA4_22R | Chr22 | 30925111  | C | T | 0.058823529 | SEC14L6  | ENST00000402034_r73 | c.627 G>A      | p.M209I  | MISSENSE         |
| MA4_22R | Chr1  | 1007257   | G | A | 0.271428571 | RNF223   | ENST00000453464_r73 | c.690 C>T      | p.P230P  | SILENT           |
| MA4_22R | Chr1  | 1168143   | G | A | 0.483516484 | B3GALT6  | ENST00000379198_r73 | c.485 G>A      | p.R162Q  | MISSENSE         |
| MA4_22R | Chr1  | 1960665   | C | A | 0.101010101 | GABRD    | ENST00000378585_r73 | c.807 C>A      | p.F269L  | MISSENSE         |
| MA4_22R | Chr1  | 3683892   | G | A | 0.068181818 | CCDC27   | ENST00000294600_r73 | c.1626 G>A     | p.L542L  | SILENT           |

Sheet1

|         |       |           |     |   |             |            |                     |               |             |                  |
|---------|-------|-----------|-----|---|-------------|------------|---------------------|---------------|-------------|------------------|
| MA4_22R | Chr1  | 4772148   | G   | A | 0.561403509 | AJAP1      | ENST00000378190_r73 | c.218 G>A     | p.R73Q      | MISSENSE         |
| MA4_22R | Chr1  | 6531080   | G   | A | 0.403508772 | PLEKHG5    | ENST00000377748_r73 | c.1593 C>T    | p.R531R     | SILENT           |
| MA4_22R | Chr1  | 11589887  | C   | T | 0.195121951 | PTCHD2     | ENST00000294484_r73 | c.2973 C>T    | p.C991C     | SILENT           |
| MA4_22R | Chr1  | 17396656  | T   | A | 0.064102564 | PADI2      | ENST00000375486_r73 | c.1691 A>T    | p.Q564L     | MISSENSE         |
| MA4_22R | Chr1  | 24408594  | C   | T | 0.265306122 | MYOM3      | ENST00000374434_r73 | c.2177 G>A    | p.R726H     | MISSENSE         |
| MA4_22R | Chr22 | 40042742  | C   | T | 0.077419355 | CACNA1I    | ENST00000404898_r73 | c.1318 C>T    | p.Q440*     | NONSENSE         |
| MA4_22R | Chr22 | 50714157  | C   | T | 0.089552239 | PLXNB2     | ENST00000449103_r73 | c.5493 G>A    | p.L1831L    | SILENT           |
| MA4_22R | Chr22 | 50714157  | C   | T | 0.089552239 | AL022328.1 | ENST00000595015_r73 | c.55 C>T      | p.Q19*      | NONSENSE         |
| MA4_22R | Chr1  | 156509684 | G   | A | 0.051094891 | IQGAP3     | ENST00000361170_r73 | c.2838 C>T    | p.S946S     | SILENT           |
| MA4_22R | Chr1  | 158326365 | C   | T | 0.113402062 | CD1E       | ENST00000368167_r73 | c.982 C>T     | p.R328W     | MISSENSE         |
| MA4_22R | Chr1  | 158450438 | G   | A | 0.333333333 | OR10R2     | ENST00000368152_r73 | c.771 G>A     | p.A257A     | SILENT           |
| MA4_22R | Chr1  | 161165409 | C   | A | 0.108910891 | ADAMTS4    | ENST00000367996_r73 | c.1107 G>T    | p.M369I     | MISSENSE         |
| MA4_22R | Chr1  | 162567643 | G   | A | 0.058823529 | UAP1       | ENST00000367926_r73 | c.1420 G>A    | p.G474R     | MISSENSE         |
| MA4_22R | Chr1  | 169292461 | C   | T | 0.096491228 | NME7       | ENST00000472647_r73 | c.64 G>A      | p.E22K      | MISSENSE         |
| MA4_22R | Chr1  | 169493034 | C   | T | 0.063380282 | F5         | ENST00000367797_r73 | Exon 20 5 G>A | -           | ESSENTIAL_SPLICE |
| MA4_22R | Chr1  | 172543102 | C   | A | 0.111111111 | SUCO       | ENST00000263688_r73 | c.1121 C>A    | p.S374Y     | MISSENSE         |
| MA4_22R | Chr1  | 177245460 | C   | T | 0.053763441 | FAM5B      | ENST00000361539_r73 | c.902 C>T     | p.P301L     | MISSENSE         |
| MA4_22R | Chr1  | 179562979 | A   | G | 0.389380531 | TDRD5      | ENST00000367614_r73 | c.617 A>G     | p.E206G     | MISSENSE         |
| MA4_22R | Chr1  | 180885344 | G   | A | 0.070175439 | KIAA1614   | ENST00000367588_r73 | c.105 G>A     | p.V35V      | SILENT           |
| MA4_22R | Chr1  | 184764692 | C   | T | 0.061643836 | FAM129A    | ENST00000367511_r73 | c.2206 G>A    | p.G736R     | MISSENSE         |
| MA4_22R | Chr1  | 190234153 | G   | A | 0.420634921 | FAM5C      | ENST00000367462_r73 | c.460 C>T     | p.R154W     | MISSENSE         |
| MA4_22R | Chr1  | 205033551 | G   | A | 0.064516129 | CNTN2      | ENST00000331830_r73 | c.1342 G>A    | p.A448T     | MISSENSE         |
| MA4_22R | Chr1  | 223803625 | C   | T | 0.058823529 | CAPN8      | ENST00000366872_r73 | c.1342 G>A    | p.G448R     | MISSENSE         |
| MA4_22R | Chr1  | 226127230 | G   | T | 0.135135135 | LEFTY2     | ENST00000366820_r73 | c.568 C>A     | p.L190M     | MISSENSE         |
| MA4_22R | Chr1  | 228506816 | C   | T | 0.2125      | OBSCN      | ENST00000284548_r73 | c.14363 C>T   | p.T4788M    | MISSENSE         |
| MA4_22R | Chr1  | 232650601 | C   | G | 0.053691275 | SIPA1L2    | ENST00000366630_r73 | c.485 G>C     | p.S162T     | MISSENSE         |
| MA4_22R | Chr1  | 232943422 | A   | T | 0.05952381  | MAP10      | ENST00000418460_r73 | c.2653 A>T    | p.K885*     | NONSENSE         |
| MA4_22R | Chr1  | 235887462 | C   | T | 0.060240964 | LYST       | ENST00000389794_r73 | c.9181 G>A    | p.E3061K    | MISSENSE         |
| MA4_22R | Chr11 | 15199983  | GG  | - | 0.123076923 | INSC       | ENST00000379554_r73 | c.710 GG>-    | p.R237fs*10 | FRAMESHIFT       |
| MA4_22R | Chr7  | 26237308  | G   | - | 0.180124224 | HNRNPA2B1  | ENST00000354667_r73 | c.87 C>-      | p.S29fs*9   | FRAMESHIFT       |
| MA4_22R | Chr7  | 100001318 | G   | - | 0.185185185 | ZCWPW1     | ENST00000398027_r73 | c.1409 C>-    | p.T470fs*41 | FRAMESHIFT       |
| MA4_22R | Chr2  | 43924491  | G   | - | 0.113207547 | PLEKHH2    | ENST00000282406_r73 | c.684 G>-     | p.M228fs*16 | FRAMESHIFT       |
| MA4_22R | Chr2  | 73430157  | GC  | - | 0.133333333 | NOTO       | ENST00000398468_r73 | c.363 GC>-    | p.L121fs*32 | FRAMESHIFT       |
| MA4_22R | Chr2  | 71160044  | T   | - | 0.125       | VAX2       | ENST00000234392_r73 | c.583 T>-     | p.P195fs*9  | FRAMESHIFT       |
| MA4_22R | Chr2  | 113588969 | TC  | - | 0.107142857 | IL1B       | ENST00000263341_r73 | c.496 GA>-    | p.E166fs*3  | FRAMESHIFT       |
| MA4_22R | Chr2  | 201399723 | TTC | - | 0.148148148 | SGOL2      | ENST00000357799_r73 | c.138 TTC>-   | p.N46 NS>N  | MISSENSE         |
| MA4_22R | Chr2  | 220412717 | CC  | - | 0.142857143 | TMEM198    | ENST00000344458_r73 | c.656 CC>-    | p.A219fs*22 | FRAMESHIFT       |

Sheet1

|         |       |           |         |    |             |               |                     |                 |              |            |
|---------|-------|-----------|---------|----|-------------|---------------|---------------------|-----------------|--------------|------------|
| MA4_22R | Chr2  | 222291323 | AC      | -  | 0.101694915 | EPHA4         | ENST00000409938_r73 | c.2706 GT>-     | p.L902fs*7   | FRAMESHIFT |
| MA4_22R | Chr2  | 238662045 | G       | -  | 0.117647059 | LRRFIP1       | ENST00000308482_r73 | c.961 G>-       | p.D321fs*3   | FRAMESHIFT |
| MA4_22R | Chr1  | 22970558  | GCT     | -  | 0.176470588 | C1QC          | ENST00000374640_r73 | c.42 GCT>-      | p.K14 KL>K   | MISSENSE   |
| MA4_22R | Chr1  | 31899598  | C       | -  | 0.102040816 | SERINC2       | ENST00000373710_r73 | c.735 C>-       | p.G245fs*112 | FRAMESHIFT |
| MA4_22R | Chr1  | 150469354 | A       | -  | 0.133333333 | TARS2         | ENST00000369064_r73 | c.990 A>-       | p.R330fs*6   | FRAMESHIFT |
| MA4_22R | Chr16 | 22019647  | G       | -  | 0.230769231 | C16orf52      | ENST00000542527_r73 | c.25 G>-        | p.G9fs*71    | FRAMESHIFT |
| MA4_22R | Chr16 | 67680870  | GC      | -  | 0.117647059 | RLTPR         | ENST00000334583_r73 | c.605 GC>-      | p.G202fs*30  | FRAMESHIFT |
| MA4_22R | Chr16 | 68026446  | T       | -  | 0.142857143 | DPEP2         | ENST00000393847_r73 | c.357 A>-       | p.L119fs*51  | FRAMESHIFT |
| MA4_22R | Chr13 | 51929241  | T       | -  | 0.107526882 | SERPINE3      | ENST00000521255_r73 | c.962 T>-       | p.L321fs*9   | FRAMESHIFT |
| MA4_22R | Chr6  | 38743571  | G       | -  | 0.148148148 | DNAH8         | ENST00000449981_r73 | c.1806 G>-      | p.L602fs*6   | FRAMESHIFT |
| MA4_22R | ChrX  | 13792720  | TG      | -  | 0.107142857 | GPM6B         | ENST00000454189_r73 | c.683 CA>-      | p.T228fs*2   | FRAMESHIFT |
| MA4_22R | ChrX  | 47918404  | C       | -  | 0.125       | ZNF630        | ENST00000409324_r73 | c.1427 G>-      | p.G476fs*59  | FRAMESHIFT |
| MA4_22R | ChrX  | 50654097  | C       | -  | 0.153846154 | BMP15         | ENST00000252677_r73 | c.314 C>-       | p.A105fs*26  | FRAMESHIFT |
| MA4_22R | ChrX  | 53588762  | CC      | -  | 0.12        | HUWE1         | ENST00000342160_r73 | c.7461 GG>-     | p.R2487fs*3  | FRAMESHIFT |
| MA4_22R | ChrX  | 99941061  | T       | -  | 0.1         | SYTL4         | ENST00000372989_r73 | c.1375 A>-      | p.G459fs*45  | FRAMESHIFT |
| MA4_22R | ChrX  | 104728339 | C       | -  | 0.127659575 | IL1RAPL2      | ENST00000372582_r73 | c.732 C>-       | p.F244fs*10  | FRAMESHIFT |
| MA4_22R | ChrX  | 106229235 | T       | -  | 0.113207547 | MORC4         | ENST00000355610_r73 | c.504 A>-       | p.I168fs*11  | FRAMESHIFT |
| MA4_22R | ChrX  | 117695409 | TA      | -  | 0.121212121 | DOCK11        | ENST00000276202_r73 | c.622 TA>-      | p.Y208fs*1   | FRAMESHIFT |
| MA4_22R | ChrX  | 131211974 | CA      | -  | 0.126984127 | FRMD7         | ENST00000298542_r73 | c.2070 TG>-     | p.D690fs*11  | FRAMESHIFT |
| MA4_22R | Chr3  | 9989580   | CG      | -  | 0.153846154 | PRRT3         | ENST00000295984_r73 | c.1276 CG>-     | p.R426fs*225 | FRAMESHIFT |
| MA4_22R | Chr3  | 11372865  | GCCGGGA | -  | 0.100628931 | ATG7          | ENST00000446450_r73 | c.613 GCCGGGA>- | p.P205fs*420 | FRAMESHIFT |
| MA4_22R | Chr3  | 52538052  | GC      | -  | 0.106666667 | STAB1         | ENST00000321725_r73 | c.1031 GC>-     | p.C344fs*1   | FRAMESHIFT |
| MA4_22R | Chr9  | 38068159  | AG      | -  | 0.115384615 | RP11-613M10.9 | ENST00000540557_r73 | c.483 CT>-      | p.L161fs*84  | FRAMESHIFT |
| MA4_22R | Chr9  | 38068159  | AG      | -  | 0.115384615 | SHB           | ENST00000377707_r73 | c.483 CT>-      | p.L161fs*84  | FRAMESHIFT |
| MA4_22R | Chr9  | 140329682 | A       | -  | 0.115384615 | ENTPD8        | ENST00000344119_r73 | c.1159 T>-      | p.W387fs*23  | FRAMESHIFT |
| MA4_22R | Chr12 | 33592372  | A       | -  | 0.123076923 | SYT10         | ENST00000228567_r73 | c.86 T>-        | p.V29fs*29   | FRAMESHIFT |
| MA4_22R | Chr12 | 64062132  | G       | -  | 0.113207547 | DPY19L2       | ENST00000324472_r73 | c.42 C>-        | p.S14fs*20   | FRAMESHIFT |
| MA4_22R | Chr12 | 102591411 | T       | -  | 0.115384615 | PMCH          | ENST00000329406_r73 | c.138 A>-       | p.K46fs*29   | FRAMESHIFT |
| MA4_22R | Chr12 | 108133240 | C       | -  | 0.125       | PRDM4         | ENST00000228437_r73 | c.2013 G>-      | p.E671fs*42  | FRAMESHIFT |
| MA4_22R | Chr12 | 121678328 | -       | TT | 0.12195122  | CAMKK2        | ENST00000392474_r73 | c.1614 ->AA     | p.K538fs*7   | FRAMESHIFT |
| MA4_22R | Chr14 | 95909596  | C       | -  | 0.103896104 | SYNE3         | ENST00000334258_r73 | c.1807 G>-      | p.A603fs*64  | FRAMESHIFT |
| MA4_22R | Chr15 | 42164605  | TGGT    | -  | 0.117647059 | SPTBN5        | ENST00000320955_r73 | c.5057 ACCA>-   | p.D1686fs*44 | FRAMESHIFT |
| MA4_22R | Chr4  | 6037696   | CT      | -  | 0.111111111 | JAKMIP1       | ENST00000409021_r73 | c.2313 AG>-     | p.R771fs*72  | FRAMESHIFT |
| MA4_22R | Chr19 | 10096537  | G       | -  | 0.166666667 | COL5A3        | ENST00000264828_r73 | c.2387 C>-      | p.P796fs*19  | FRAMESHIFT |
| MA4_22R | Chr19 | 17337584  | G       | -  | 0.24        | OCEL1         | ENST00000215061_r73 | c.152 G>-       | p.C51fs*106  | FRAMESHIFT |
| MA4_22R | Chr19 | 56154064  | T       | -  | 0.166666667 | ZNF580        | ENST00000325333_r73 | c.190 T>-       | p.T64fs*127  | FRAMESHIFT |
| MA4_22R | Chr10 | 33017914  | A       | -  | 0.181818182 | C10orf68      | ENST00000302316_r73 | c.689 A>-       | p.E230fs*8   | FRAMESHIFT |

Sheet1

|         |       |           |    |   |             |         |                     |             |             |            |
|---------|-------|-----------|----|---|-------------|---------|---------------------|-------------|-------------|------------|
| MA4_22R | Chr5  | 61833074  | A  | - | 0.136986301 | IPO11   | ENST00000325324_r73 | c.2208 A>-  | p.L736fs*23 | FRAMESHIFT |
| MA4_22R | Chr5  | 72183033  | A  | - | 0.117647059 | TNPO1   | ENST00000337273_r73 | c.1287 A>-  | p.L429fs*12 | FRAMESHIFT |
| MA4_22R | Chr5  | 98109796  | TC | - | 0.130434783 | RGMB    | ENST00000308234_r73 | c.145 TC>-  | p.S49fs*10  | FRAMESHIFT |
| MA4_23  | Chr18 | 43311053  | C  | T | 0.143349807 | SLC14A1 | ENST00000321925_r73 | c.225 C>T   | p.P75P      | SILENT     |
| MA4_23  | Chr19 | 6374247   | C  | G | 0.474226804 | ALKBH7  | ENST00000245812_r73 | c.238 C>G   | p.R80G      | MISSENSE   |
| MA4_23  | Chr19 | 40900136  | G  | A | 0.705932932 | PRX     | ENST00000324001_r73 | c.4123 C>T  | p.R1375W    | MISSENSE   |
| MA4_23  | Chr6  | 63921655  | T  | C | 0.006410997 | FKBP1C  | ENST00000370659_r73 | c.194 T>C   | p.V65A      | MISSENSE   |
| MA4_23  | Chr7  | 100275000 | G  | A | 0.049090909 | GNB2    | ENST00000303210_r73 | c.229 G>A   | p.G77R      | MISSENSE   |
| MA4_23  | Chr20 | 57571837  | C  | T | 0.4588161   | CTSZ    | ENST00000217131_r73 | c.658 G>A   | p.E220K     | MISSENSE   |
| MA4_23  | Chr1  | 115258747 | C  | T | 0.06218555  | NRAS    | ENST00000311936_r73 | c.35 G>A    | p.G12D      | MISSENSE   |
| MA4_23  | Chr12 | 25398284  | C  | A | 0.0203125   | KRAS    | ENST00000311936_r73 | c.437 C>T   | p.A146V     | MISSENSE   |
| MA4_23  | Chr12 | 25378561  | G  | A | 0.02244898  | KRAS    | ENST00000369535_r73 | c.35 G>A    | p.G12D      | MISSENSE   |
| MA4_23  | Chr12 | 124856830 | C  | T | 0.424094635 | NCOR2   | ENST00000405201_r73 | c.2545 G>A  | p.E849K     | MISSENSE   |
| MA4_23  | Chr11 | 58959633  | G  | A | 0.19753824  | DTX4    | ENST00000227451_r73 | c.1284 G>A  | p.T428T     | SILENT     |
| MA4_23  | Chr18 | 54362417  | A  | G | 0.011690047 | WDR7    | ENST00000357574_r73 | c.1345 A>G  | p.M449V     | MISSENSE   |
| MA4_23R | Chr1  | 152188413 | C  | T | 0.134920635 | HRNR    | ENST00000368801_r73 | c.5692 G>A  | p.E1898K    | MISSENSE   |
| MA4_23R | Chr11 | 58959633  | G  | A | 0.194152547 | DTX4    | ENST00000227451_r73 | c.1284 G>A  | p.T428T     | SILENT     |
| MA4_23R | Chr12 | 124856830 | C  | T | 0.418136171 | NCOR2   | ENST00000405201_r73 | c.2545 G>A  | p.E849K     | MISSENSE   |
| MA4_23R | Chr13 | 28597490  | C  | T | 0.186016213 | FLT3    | ENST00000241453_r73 | c.2415 G>A  | p.K805K     | SILENT     |
| MA4_23R | Chr15 | 41989003  | G  | C | 0.170652877 | MGA     | ENST00000566586_r73 | c.1795 G>C  | p.V599L     | MISSENSE   |
| MA4_23R | Chr16 | 70883694  | G  | A | 0.092937092 | HYDIN   | ENST00000393567_r73 | c.12808 C>T | p.H4270Y    | MISSENSE   |
| MA4_23R | Chr16 | 70937582  | G  | A | 0.094841213 | HYDIN   | ENST00000393567_r73 | c.8795 C>T  | p.P2932L    | MISSENSE   |
| MA4_23R | Chr18 | 54362417  | A  | G | 0.181823661 | WDR7    | ENST00000357574_r73 | c.1345 A>G  | p.M449V     | MISSENSE   |
| MA4_23R | Chr20 | 17950950  | G  | A | 0.171070534 | MGME1   | ENST00000377710_r73 | c.448 G>A   | p.E150K     | MISSENSE   |
| MA4_23R | Chr3  | 49756522  | C  | T | 0.236234458 | AMIGO3  | ENST00000320431_r73 | c.377 G>A   | p.R126H     | MISSENSE   |
| MA4_23R | Chr3  | 133368471 | A  | G | 0.219197759 | TOPBP1  | ENST00000260810_r73 | c.1260 T>C  | p.H420H     | SILENT     |
| MA4_23R | Chr4  | 10445952  | T  | C | 0.201005025 | ZNF518B | ENST00000326756_r73 | c.2001 A>G  | p.R667R     | SILENT     |
| MA4_23R | Chr4  | 16077351  | T  | C | 0.186183079 | PROM1   | ENST00000505450_r73 | c.179 A>G   | p.H60R      | MISSENSE   |
| MA4_23R | Chr6  | 114270153 | T  | C | 0.17850901  | HDAC2   | ENST00000519065_r73 | c.831 A>G   | p.L277L     | SILENT     |
| MA4_23R | Chr6  | 117128289 | G  | C | 0.185470706 | GPRC6A  | ENST00000310357_r73 | c.579 C>G   | p.F193L     | MISSENSE   |
| MA4_23R | Chr8  | 144994337 | G  | A | 0.235934664 | PLEC    | ENST00000345136_r73 | c.9652 C>T  | p.R3218W    | MISSENSE   |
| MA4_23R | ChrX  | 24741351  | C  | T | 0.258435032 | POLA1   | ENST00000379059_r73 | c.1149 C>T  | p.I383I     | SILENT     |
| MA4_23R | ChrX  | 35938045  | C  | T | 0.540260608 | CXorf22 | ENST00000297866_r73 | c.129 C>T   | p.I43I      | SILENT     |
| MA4_23R | ChrX  | 35969297  | G  | A | 0.528962956 | CXorf22 | ENST00000297866_r73 | c.706 G>A   | p.V236M     | MISSENSE   |
| MA4_23R | ChrX  | 44171953  | T  | C | 0.385125184 | EFHC2   | ENST00000420999_r73 | c.92 A>G    | p.N31S      | MISSENSE   |
| MA4_23R | ChrX  | 48847497  | T  | C | 0.530505952 | GRIPAP1 | ENST00000376441_r73 | c.483 A>G   | p.E161E     | SILENT     |
| MA4_23R | ChrX  | 139038443 | G  | A | 0.254189944 | CXorf66 | ENST00000370540_r73 | c.698 C>T   | p.P233L     | MISSENSE   |

Sheet1

|         |       |           |   |     |             |          |                     |        |       |            |          |
|---------|-------|-----------|---|-----|-------------|----------|---------------------|--------|-------|------------|----------|
| MA4_23R | Chr1  | 152278814 | C | T   | 0.209754681 | FLG      | ENST00000368799_r73 | c.8548 | G>A   | p.G2850S   | MISSENSE |
| MA4_23R | Chr6  | 32191659  | - | AGC | 0.070879242 | NOTCH4   | ENST00000375023_r73 | c.47   | ->GCT | p.L16 L>RL | MISSENSE |
| MA4_23R | ChrX  | 12937804  | C | T   | 0.532887403 | TLR8     | ENST00000218032_r73 | c.645  | C>T   | p.H215H    | SILENT   |
| MA4_23R | ChrX  | 12939112  | G | C   | 0.546212396 | TLR8     | ENST00000218032_r73 | c.1953 | G>C   | p.L651L    | SILENT   |
| MA4_23R | ChrX  | 22291732  | C | T   | 0.553430079 | ZNF645   | ENST00000323684_r73 | c.624  | C>T   | p.I208I    | SILENT   |
| MA4_23R | ChrX  | 36403036  | A | G   | 0.286539082 | CXorf30  | ENST00000378657_r73 | c.1817 | A>G   | p.H606R    | MISSENSE |
| MA4_23R | ChrX  | 135430044 | T | C   | 0.283352557 | GPR112   | ENST00000394143_r73 | c.4179 | T>C   | p.T1393T   | SILENT   |
| MA4_23R | ChrX  | 16168677  | T | C   | 0.551388889 | GRPR     | ENST00000380289_r73 | c.663  | T>C   | p.I221I    | SILENT   |
| MA4_23R | Chr18 | 43311053  | C | T   | 0.196078431 | SLC14A1  | ENST00000321925_r73 | c.225  | C>T   | p.P75P     | SILENT   |
| MA4_23R | Chr20 | 57571837  | C | T   | 0.2951875   | CTSZ     | ENST00000217131_r73 | c.658  | G>A   | p.E220K    | MISSENSE |
| MA4_23R | ChrX  | 135430483 | T | C   | 0.26859095  | GPR112   | ENST00000394143_r73 | c.4618 | T>C   | p.S1540P   | MISSENSE |
| MA4_23R | Chr1  | 985377    | C | T   | 0.130434783 | AGRN     | ENST00000379370_r73 | c.4839 | C>T   | p.C1613C   | SILENT   |
| MA4_23R | Chr1  | 989216    | C | T   | 0.290322581 | AGRN     | ENST00000379370_r73 | c.5735 | C>T   | p.A1912V   | MISSENSE |
| MA4_23R | Chr1  | 1217690   | C | T   | 0.177777778 | SCNN1D   | ENST00000379116_r73 | c.346  | C>T   | p.R116W    | MISSENSE |
| MA4_23R | Chr1  | 2451298   | G | A   | 0.171875    | PANK4    | ENST00000378466_r73 | c.795  | C>T   | p.L265L    | SILENT   |
| MA4_23R | Chr1  | 11733905  | C | T   | 0.147286822 | FBXO6    | ENST00000376753_r73 | c.879  | C>T   | p.F293F    | SILENT   |
| MA4_23R | Chr1  | 12248855  | G | C   | 0.248554913 | TNFRSF1B | ENST00000376259_r73 | c.81   | G>C   | p.V27V     | SILENT   |
| MA4_23R | Chr1  | 16353911  | A | G   | 0.143884892 | CLCNKA   | ENST00000375692_r73 | c.762  | A>G   | p.A254A    | SILENT   |
| MA4_23R | Chr1  | 16535487  | G | C   | 0.184210526 | ARHGEF19 | ENST00000270747_r73 | c.63   | C>G   | p.H21Q     | MISSENSE |
| MA4_23R | Chr1  | 17603340  | C | T   | 0.163265306 | PADI3    | ENST00000375460_r73 | c.1524 | C>T   | p.H508H    | SILENT   |
| MA4_23R | Chr1  | 22202483  | G | A   | 0.118811881 | HSPG2    | ENST00000374695_r73 | c.3056 | C>T   | p.P1019L   | MISSENSE |
| MA4_23R | Chr1  | 22307376  | C | T   | 0.409090909 | CELA3B   | ENST00000337107_r73 | c.189  | C>T   | p.I63I     | SILENT   |
| MA4_23R | Chr1  | 25883695  | C | T   | 0.183908046 | LDLRAP1  | ENST00000374338_r73 | c.396  | C>T   | p.I132I    | SILENT   |
| MA4_23R | Chr1  | 26665873  | C | G   | 0.234042553 | AIM1L    | ENST00000527815_r73 | c.630  | G>C   | p.K210N    | MISSENSE |
| MA4_23R | Chr1  | 28206363  | G | C   | 0.285714286 | THEMIS2  | ENST00000373925_r73 | c.444  | G>C   | p.L148L    | SILENT   |
| MA4_23R | Chr1  | 29475296  | G | A   | 0.196969697 | SRSF4    | ENST00000373795_r73 | c.1111 | C>T   | p.R371C    | MISSENSE |
| MA4_23R | Chr1  | 32740366  | G | A   | 0.151515152 | LCK      | ENST00000336890_r73 | c.134  | G>A   | p.R45Q     | MISSENSE |
| MA4_23R | Chr1  | 41475187  | A | G   | 0.292307692 | CTPS1    | ENST00000372621_r73 | c.1617 | A>G   | p.P539P    | SILENT   |
| MA4_23R | Chr1  | 45228266  | A | T   | 0.28125     | KIF2C    | ENST00000372224_r73 | c.1907 | A>T   | p.E636V    | MISSENSE |
| MA4_23R | Chr1  | 53569148  | C | T   | 0.096774194 | SLC1A7   | ENST00000371494_r73 | c.567  | G>A   | p.E189E    | SILENT   |
| MA4_23R | Chr1  | 54060404  | G | A   | 0.288888889 | GLIS1    | ENST00000312233_r73 | c.172  | C>T   | p.P58S     | MISSENSE |
| MA4_23R | Chr1  | 79121172  | C | T   | 0.225806452 | IFI44    | ENST00000370747_r73 | c.816  | C>T   | p.N272N    | SILENT   |
| MA4_23R | Chr1  | 91967341  | A | G   | 0.149350649 | CDC7     | ENST00000234626_r73 | c.68   | A>G   | p.Q23R     | MISSENSE |
| MA4_23R | Chr1  | 108697684 | C | T   | 0.152091255 | SLC25A24 | ENST00000565488_r73 | c.743  | G>A   | p.R248H    | MISSENSE |
| MA4_23R | Chr1  | 109808448 | A | G   | 0.177419355 | CELSR2   | ENST00000271332_r73 | c.5819 | A>G   | p.D1940G   | MISSENSE |
| MA4_23R | Chr1  | 114226447 | A | G   | 0.181818182 | MAGI3    | ENST00000307546_r73 | c.4257 | A>G   | p.V1419V   | SILENT   |
| MA4_23R | Chr1  | 117120150 | G | A   | 0.136363636 | IGSF3    | ENST00000369486_r73 | c.3369 | C>T   | p.D1123D   | SILENT   |

Sheet1

|         |       |           |   |   |             |              |                     |             |          |          |
|---------|-------|-----------|---|---|-------------|--------------|---------------------|-------------|----------|----------|
| MA4_23R | Chr1  | 143767466 | G | A | 0.086206897 | PPIAL4G      | ENST00000419275_r73 | c.383 C>T   | p.A128V  | MISSENSE |
| MA4_23R | Chr1  | 144921924 | G | A | 0.080745342 | PDE4DIP      | ENST00000313382_r73 | c.1303 C>T  | p.L435L  | SILENT   |
| MA4_23R | Chr1  | 151810935 | G | C | 0.14        | C2CD4D       | ENST00000454109_r73 | c.531 C>G   | p.A177A  | SILENT   |
| MA4_23R | Chr1  | 152187589 | G | A | 0.201117318 | HRNR         | ENST00000368801_r73 | c.6516 C>T  | p.H2172H | SILENT   |
| MA4_23R | Chr1  | 152187628 | A | G | 0.090909091 | HRNR         | ENST00000368801_r73 | c.6477 T>C  | p.Y2159Y | SILENT   |
| MA4_23R | Chr1  | 152188999 | G | A | 0.120967742 | HRNR         | ENST00000368801_r73 | c.5106 C>T  | p.H1702H | SILENT   |
| MA4_23R | Chr1  | 152190835 | G | A | 0.258064516 | HRNR         | ENST00000368801_r73 | c.3270 C>T  | p.G1090G | SILENT   |
| MA4_23R | Chr1  | 152190945 | C | T | 0.407407407 | HRNR         | ENST00000368801_r73 | c.3160 G>A  | p.E1054K | MISSENSE |
| MA4_23R | Chr1  | 152276699 | A | G | 0.162962963 | FLG          | ENST00000368799_r73 | c.10663 T>C | p.W3555R | MISSENSE |
| MA4_23R | Chr1  | 153967598 | G | A | 0.20661157  | NUP210L      | ENST00000368559_r73 | c.5445 C>T  | p.L1815L | SILENT   |
| MA4_23R | Chr1  | 155004236 | G | A | 0.175       | DCST2        | ENST00000368424_r73 | c.553 C>T   | p.R185W  | MISSENSE |
| MA4_23R | Chr1  | 155152310 | C | T | 0.090909091 | TRIM46       | ENST00000368382_r73 | c.1419 C>T  | p.P473P  | SILENT   |
| MA4_23R | Chr1  | 156518453 | G | A | 0.181818182 | IQGAP3       | ENST00000361170_r73 | c.1913 C>T  | p.A638V  | MISSENSE |
| MA4_23R | Chr1  | 161642985 | G | A | 0.20754717  | FCGR2B       | ENST00000236937_r73 | c.612 G>A   | p.L204L  | SILENT   |
| MA4_23R | Chr1  | 165638548 | C | T | 0.144329897 | ALDH9A1      | ENST00000354775_r73 | c.1070 G>A  | p.R357Q  | MISSENSE |
| MA4_23R | Chr1  | 166961966 | T | C | 0.15        | MAEL         | ENST00000367872_r73 | c.369 T>C   | p.H123H  | SILENT   |
| MA4_23R | Chr1  | 167962499 | G | T | 0.140186916 | DCAF6        | ENST00000367843_r73 | c.724 G>T   | p.A242S  | MISSENSE |
| MA4_23R | Chr1  | 192778206 | A | G | 0.315789474 | RGS2         | ENST00000235382_r73 | c.5 A>G     | p.Q2R    | MISSENSE |
| MA4_23R | Chr1  | 193119478 | C | T | 0.175257732 | CDC73        | ENST00000367435_r73 | c.873 C>T   | p.N291N  | SILENT   |
| MA4_23R | Chr1  | 200613610 | T | C | 0.12345679  | DDX59        | ENST00000331314_r73 | c.1632 A>G  | p.T544T  | SILENT   |
| MA4_23R | Chr1  | 203141167 | C | T | 0.180327869 | MYBPH        | ENST00000255416_r73 | c.510 G>A   | p.E170E  | SILENT   |
| MA4_23R | Chr1  | 207263734 | A | T | 0.24        | C4BPB        | ENST00000367078_r73 | c.140 A>T   | p.Y47F   | MISSENSE |
| MA4_23R | Chr1  | 209805977 | C | T | 0.181818182 | LAMB3        | ENST00000356082_r73 | c.773 G>A   | p.R258H  | MISSENSE |
| MA4_23R | Chr1  | 222802152 | A | G | 0.194444444 | MIA3         | ENST00000344922_r73 | c.1590 A>G  | p.G530G  | SILENT   |
| MA4_23R | Chr1  | 247587870 | G | A | 0.217948718 | NLRP3        | ENST00000391828_r73 | c.1125 G>A  | p.E375E  | SILENT   |
| MA4_23R | Chr1  | 247719734 | C | T | 0.151515152 | GCSAML       | ENST00000366488_r73 | c.55 C>T    | p.P19S   | MISSENSE |
| MA4_23R | Chr1  | 248202474 | A | G | 0.113861386 | OR2L2        | ENST00000366479_r73 | c.905 A>G   | p.Q302R  | MISSENSE |
| MA4_23R | Chr1  | 248616776 | C | T | 0.164285714 | OR2T2        | ENST00000342927_r73 | c.678 C>T   | p.V226V  | SILENT   |
| MA4_23R | Chr10 | 3141522   | G | A | 0.333333333 | PFKP         | ENST00000381125_r73 | c.242 G>A   | p.S81N   | MISSENSE |
| MA4_23R | Chr10 | 3143135   | G | A | 175         | PFKP         | ENST00000381075_r73 | c.183 G>A   | p.R61R   | SILENT   |
| MA4_23R | Chr10 | 13672334  | A | G | 0.106122449 | PRPF18       | ENST00000378572_r73 | c.1023 A>G  | p.A341A  | SILENT   |
| MA4_23R | Chr10 | 13672334  | A | G | 0.106122449 | RP11-295P9.3 | ENST00000595538_r73 | c.98 A>G    | p.A33G   | MISSENSE |
| MA4_23R | Chr10 | 13699231  | C | T | 0.230769231 | FRMD4A       | ENST00000357447_r73 | c.2358 G>A  | p.R786R  | SILENT   |
| MA4_23R | Chr10 | 13702435  | C | T | 0.183673469 | FRMD4A       | ENST00000357447_r73 | c.1779 G>A  | p.Q593Q  | SILENT   |
| MA4_23R | Chr10 | 23319653  | T | C | 0.135021097 | ARMC3        | ENST00000298032_r73 | c.2174 T>C  | p.M725T  | MISSENSE |
| MA4_23R | Chr10 | 24762184  | G | A | 0.178947368 | KIAA1217     | ENST00000376462_r73 | c.634 G>A   | p.G212R  | MISSENSE |
| MA4_23R | Chr10 | 32097609  | G | A | 0.222222222 | ARHGAP12     | ENST00000311380_r73 | c.2178 C>T  | p.D726D  | SILENT   |

Sheet1

|         |       |           |   |   |             |            |                     |             |          |          |
|---------|-------|-----------|---|---|-------------|------------|---------------------|-------------|----------|----------|
| MA4_23R | Chr10 | 50667225  | C | G | 0.157303371 | ERCC6      | ENST00000355832_r73 | c.4118 G>C  | p.R1373T | MISSENSE |
| MA4_23R | Chr10 | 61835633  | G | A | 0.182795699 | ANK3       | ENST00000280772_r73 | c.5006 C>T  | p.P1669L | MISSENSE |
| MA4_23R | Chr10 | 69299372  | T | G | 0.223214286 | CTNNA3     | ENST00000433211_r73 | c.348 A>C   | p.P116P  | SILENT   |
| MA4_23R | Chr10 | 79781312  | G | A | 0.27027027  | POLR3A     | ENST00000372371_r73 | c.1177 C>T  | p.P393S  | MISSENSE |
| MA4_23R | Chr10 | 82013319  | T | G | 0.223076923 | AL359195.1 | ENST00000356374_r73 | c.837 T>G   | p.F279L  | MISSENSE |
| MA4_23R | Chr10 | 94223726  | A | G | 0.196969697 | IDE        | ENST00000265986_r73 | c.2523 T>C  | p.N841N  | SILENT   |
| MA4_23R | Chr10 | 105178380 | G | A | 0.222222222 | PDCD11     | ENST00000369797_r73 | c.2095 G>A  | p.E699K  | MISSENSE |
| MA4_23R | Chr10 | 106075269 | G | A | 0.25        | ITPRIP     | ENST00000337478_r73 | c.541 C>T   | p.R181W  | MISSENSE |
| MA4_23R | Chr10 | 116853561 | G | A | 0.23943662  | ATRNL1     | ENST00000355044_r73 | c.52 G>A    | p.G18R   | MISSENSE |
| MA4_23R | Chr10 | 134218641 | C | T | 0.28        | PWWP2B     | ENST00000305233_r73 | c.637 C>T   | p.R213C  | MISSENSE |
| MA4_23R | Chr10 | 134622089 | A | G | 0.164705882 | TTC40      | ENST00000368586_r73 | c.7984 T>C  | p.W2662R | MISSENSE |
| MA4_23R | Chr11 | 5537147   | C | G | 0.194029851 | UBQLNL     | ENST00000380184_r73 | c.525 G>C   | p.M175I  | MISSENSE |
| MA4_23R | Chr11 | 16838719  | C | T | 0.16025641  | PLEKHA7    | ENST00000355661_r73 | c.1494 G>A  | p.A498A  | SILENT   |
| MA4_23R | Chr11 | 45672170  | G | A | 0.266055046 | CHST1      | ENST00000308064_r73 | c.304 C>T   | p.P102S  | MISSENSE |
| MA4_23R | Chr11 | 46907712  | A | G | 0.172839506 | LRP4       | ENST00000378623_r73 | c.2436 T>C  | p.D812D  | SILENT   |
| MA4_23R | Chr11 | 55541614  | G | T | 0.166666667 | OR5D13     | ENST00000361760_r73 | c.701 G>T   | p.S234I  | MISSENSE |
| MA4_23R | Chr11 | 55872749  | C | T | 0.151394422 | OR8H2      | ENST00000313503_r73 | c.231 C>T   | p.V77V   | SILENT   |
| MA4_23R | Chr11 | 57147126  | G | A | 0.173553719 | PRG3       | ENST00000287143_r73 | c.216 C>T   | p.N72N   | SILENT   |
| MA4_23R | Chr11 | 60610065  | G | A | 0.342342342 | CCDC86     | ENST00000227520_r73 | c.468 G>A   | p.P156P  | SILENT   |
| MA4_23R | Chr11 | 62286188  | G | A | 0.156862745 | AHNAK      | ENST00000378024_r73 | c.15701 C>T | p.P5234L | MISSENSE |
| MA4_23R | Chr11 | 62656046  | A | C | 0.176056338 | SLC3A2     | ENST00000377890_r73 | c.1774 A>C  | p.K592Q  | MISSENSE |
| MA4_23R | Chr11 | 64577243  | G | A | 0.181818182 | MEN1       | ENST00000377326_r73 | c.339 C>T   | p.S113S  | SILENT   |
| MA4_23R | Chr11 | 65359552  | A | G | 0.141791045 | EHBP1L1    | ENST00000309295_r73 | c.4463 A>G  | p.K1488R | MISSENSE |
| MA4_23R | Chr11 | 65359552  | A | G | 0.141791045 | AP001362.1 | ENST00000597463_r73 | c.268 T>C   | p.L90L   | SILENT   |
| MA4_23R | Chr11 | 67209515  | C | T | 0.240963855 | CORO1B     | ENST00000341356_r73 | c.246 G>A   | p.T82T   | SILENT   |
| MA4_23R | Chr11 | 73007938  | C | T | 0.166666667 | P2RY6      | ENST00000540342_r73 | c.375 C>T   | p.Y125Y  | SILENT   |
| MA4_23R | Chr11 | 89133530  | A | G | 0.149122807 | NOX4       | ENST00000343727_r73 | c.792 T>C   | p.S264S  | SILENT   |
| MA4_23R | Chr11 | 102482626 | T | G | 0.174825175 | MMP20      | ENST00000260228_r73 | c.383 A>C   | p.K128T  | MISSENSE |
| MA4_23R | Chr11 | 120980048 | C | T | 0.191011236 | TECTA      | ENST00000392793_r73 | c.327 C>T   | p.G109G  | SILENT   |
| MA4_23R | Chr11 | 120984338 | A | G | 0.107692308 | TECTA      | ENST00000392793_r73 | c.701 A>G   | p.Q234R  | MISSENSE |
| MA4_23R | Chr11 | 121008285 | C | T | 0.163793103 | TECTA      | ENST00000392793_r73 | c.3097 C>T  | p.R1033W | MISSENSE |
| MA4_23R | Chr11 | 121489544 | C | T | 0.153846154 | SORL1      | ENST00000260197_r73 | c.5666 C>T  | p.T1889I | MISSENSE |
| MA4_23R | Chr11 | 123753959 | G | A | 0.157894737 | TMEM225    | ENST00000375026_r73 | c.564 C>T   | p.I188I  | SILENT   |
| MA4_23R | Chr11 | 124267056 | G | A | 0.227799228 | OR8B3      | ENST00000354597_r73 | c.192 C>T   | p.F64F   | SILENT   |
| MA4_23R | Chr11 | 128638142 | C | T | 0.139784946 | FLI1       | ENST00000429175_r73 | c.360 C>T   | p.N120N  | SILENT   |
| MA4_23R | Chr12 | 332338    | G | A | 0.2         | SLC6A13    | ENST00000343164_r73 | c.1374 C>T  | p.F458F  | SILENT   |
| MA4_23R | Chr12 | 674540    | T | C | 0.270833333 | NINJ2      | ENST00000305108_r73 | c.428 A>G   | p.K143R  | MISSENSE |



Sheet1

|         |       |           |   |   |             |           |                     |            |          |          |
|---------|-------|-----------|---|---|-------------|-----------|---------------------|------------|----------|----------|
| MA4_23R | Chr12 | 6640519   | G | A | 0.260869565 | NCAPD2    | ENST00000315579_r73 | c.4147 G>A | p.E1383K | MISSENSE |
| MA4_23R | Chr12 | 7637940   | T | C | 0.130434783 | CD163     | ENST00000359156_r73 | c.2531 A>G | p.N844S  | MISSENSE |
| MA4_23R | Chr12 | 11546192  | G | A | 0.279069767 | PRB2      | ENST00000389362_r73 | c.820 C>T  | p.P274S  | MISSENSE |
| MA4_23R | Chr12 | 51693021  | C | T | 0.225352113 | BIN2      | ENST00000267012_r73 | c.568 G>A  | p.E190K  | MISSENSE |
| MA4_23R | Chr12 | 52585534  | C | T | 0.148148148 | KRT80     | ENST00000313234_r73 | c.153 G>A  | p.S51S   | SILENT   |
| MA4_23R | Chr12 | 53004526  | C | T | 0.213333333 | KRT73     | ENST00000305748_r73 | c.1204 G>A | p.A402T  | MISSENSE |
| MA4_23R | Chr12 | 53200921  | C | G | 0.179104478 | KRT4      | ENST00000551956_r73 | c.1495 G>C | p.G499R  | MISSENSE |
| MA4_23R | Chr12 | 53591607  | C | T | 0.166666667 | ITGB7     | ENST00000267082_r73 | c.330 G>A  | p.P110P  | SILENT   |
| MA4_23R | Chr12 | 56748273  | G | A | 0.175438597 | STAT2     | ENST00000314128_r73 | c.759 C>T  | p.H253H  | SILENT   |
| MA4_23R | Chr12 | 58174038  | G | C | 0.206896552 | METTL21B  | ENST00000300209_r73 | c.290 G>C  | p.G97A   | MISSENSE |
| MA4_23R | Chr12 | 80855816  | T | C | 0.12962963  | PTPRQ     | ENST00000266688_r73 | c.533 T>C  | p.V178A  | MISSENSE |
| MA4_23R | Chr12 | 95604081  | G | A | 0.186915888 | FGD6      | ENST00000343958_r73 | c.979 C>T  | p.R327C  | MISSENSE |
| MA4_23R | Chr12 | 101603543 | G | A | 0.226086957 | SLC5A8    | ENST00000536262_r73 | c.84 C>T   | p.I28I   | SILENT   |
| MA4_23R | Chr12 | 106995090 | C | T | 0.25        | RFX4      | ENST00000357881_r73 | c.36 C>T   | p.G12G   | SILENT   |
| MA4_23R | Chr12 | 107713087 | C | T | 0.175438597 | BTBD11    | ENST00000280758_r73 | c.370 C>T  | p.L124L  | SILENT   |
| MA4_23R | Chr12 | 109994854 | C | T | 0.163636364 | MMAB      | ENST00000545712_r73 | c.732 G>A  | p.S244S  | SILENT   |
| MA4_23R | Chr12 | 129308324 | C | T | 0.191919192 | SLC15A4   | ENST00000266771_r73 | c.165 G>A  | p.T55T   | SILENT   |
| MA4_23R | Chr12 | 133634950 | A | G | 0.172839506 | ZNF84     | ENST00000539354_r73 | c.1649 A>G | p.K550R  | MISSENSE |
| MA4_23R | Chr13 | 29600208  | G | A | 0.209876543 | MTUS2     | ENST00000431530_r73 | c.1403 G>A | p.R468Q  | MISSENSE |
| MA4_23R | Chr13 | 39424254  | T | C | 0.152173913 | FREM2     | ENST00000280481_r73 | c.6459 T>C | p.T2153T | SILENT   |
| MA4_23R | Chr13 | 77581658  | G | A | 0.213483146 | FBXL3     | ENST00000355619_r73 | c.909 C>T  | p.F303F  | SILENT   |
| MA4_23R | Chr13 | 96530055  | T | C | 0.155279503 | UGGT2     | ENST00000376747_r73 | c.3284 A>G | p.Q1095R | MISSENSE |
| MA4_23R | Chr13 | 102250542 | C | T | 0.197916667 | ITGBL1    | ENST00000376180_r73 | c.908 C>T  | p.A303V  | MISSENSE |
| MA4_23R | Chr13 | 103438592 | T | C | 0.201183432 | KDELCL1   | ENST00000376004_r73 | c.1481 A>G | p.H494R  | MISSENSE |
| MA4_23R | Chr14 | 20404080  | T | C | 0.148825065 | OR4K1     | ENST00000285600_r73 | c.255 T>C  | p.F85F   | SILENT   |
| MA4_23R | Chr14 | 23549380  | G | A | 0.257575758 | ACIN1     | ENST00000262710_r73 | c.1338 C>T | p.P446P  | SILENT   |
| MA4_23R | Chr14 | 23566949  | C | T | 0.121212121 | C14orf119 | ENST00000319074_r73 | c.82 C>T   | p.P28S   | MISSENSE |
| MA4_23R | Chr14 | 23861839  | G | C | 0.190909091 | MYH6      | ENST00000356287_r73 | c.3274 C>G | p.Q1092E | MISSENSE |
| MA4_23R | Chr14 | 24769809  | G | A | 0.194029851 | NOP9      | ENST00000267425_r73 | c.443 G>A  | p.S148N  | MISSENSE |
| MA4_23R | Chr14 | 24911441  | G | C | 0.183098592 | SDR39U1   | ENST00000399395_r73 | c.149 C>G  | p.P50R   | MISSENSE |
| MA4_23R | Chr14 | 45711535  | T | G | 0.124223603 | MIS18BP1  | ENST00000310806_r73 | c.845 A>C  | p.N282T  | MISSENSE |
| MA4_23R | Chr14 | 52527005  | T | C | 0.277777778 | NID2      | ENST00000216286_r73 | c.604 A>G  | p.N202D  | MISSENSE |
| MA4_23R | Chr14 | 57858186  | G | A | 0.235294118 | NAA30     | ENST00000556492_r73 | c.511 G>A  | p.E171K  | MISSENSE |
| MA4_23R | Chr14 | 59939804  | G | A | 0.173469388 | L3HYPDH   | ENST00000247194_r73 | c.944 C>T  | p.A315V  | MISSENSE |
| MA4_23R | Chr14 | 63735877  | C | T | 0.279069767 | RHOJ      | ENST00000316754_r73 | c.228 C>T  | p.T76T   | SILENT   |
| MA4_23R | Chr14 | 64488055  | A | G | 0.161290323 | SYNE2     | ENST00000344113_r73 | c.5174 A>G | p.N1725S | MISSENSE |
| MA4_23R | Chr14 | 64954574  | G | C | 0.161290323 | ZBTB25    | ENST00000261683_r73 | c.375 C>G  | p.S125S  | SILENT   |

Sheet1

|         |       |           |   |   |             |          |                     |              |          |                  |
|---------|-------|-----------|---|---|-------------|----------|---------------------|--------------|----------|------------------|
| MA4_23R | Chr14 | 91113353  | G | A | 0.25        | TTC7B    | ENST00000328459_r73 | c.1532 C>T   | p.S511L  | MISSENSE         |
| MA4_23R | Chr14 | 100934449 | G | A | 0.154761905 | WDR25    | ENST00000554998_r73 | c.914 G>A    | p.R305Q  | MISSENSE         |
| MA4_23R | Chr14 | 105174236 | T | C | 0.214285714 | INF2     | ENST00000330634_r73 | c.1632 T>C   | p.H544H  | SILENT           |
| MA4_23R | Chr14 | 105407977 | A | G | 0.245283019 | AHNAK2   | ENST00000333244_r73 | c.13811 T>C  | p.M4604T | MISSENSE         |
| MA4_23R | Chr14 | 105411286 | G | A | 0.125       | AHNAK2   | ENST00000333244_r73 | c.10502 C>T  | p.P3501L | MISSENSE         |
| MA4_23R | Chr14 | 105411287 | G | A | 0.125       | AHNAK2   | ENST00000333244_r73 | c.10501 C>T  | p.P3501S | MISSENSE         |
| MA4_23R | Chr14 | 106829985 | G | A | 0.18        | IGHV4-34 | ENST00000390616_r73 | c.61 C>T     | p.P21S   | MISSENSE         |
| MA4_23R | Chr14 | 107083424 | T | C | 0.402173913 | IGHV4-59 | ENST00000455737_r73 | c.180 A>G    | p.P60P   | SILENT           |
| MA4_23R | Chr14 | 107179058 | G | A | 0.133333333 | IGHV2-70 | ENST00000390634_r73 | c.119 C>T    | p.T40I   | MISSENSE         |
| MA4_23R | Chr15 | 23006346  | T | C | 0.270833333 | NIPAA2   | ENST00000337451_r73 | c.958 A>G    | p.M320V  | MISSENSE         |
| MA4_23R | Chr15 | 30659641  | C | T | 0.212121212 | CHRFAM7A | ENST00000299847_r73 | c.700 G>A    | p.G234R  | MISSENSE         |
| MA4_23R | Chr15 | 35274130  | G | C | 0.203703704 | ZNF770   | ENST00000356321_r73 | c.1506 C>G   | p.P502P  | SILENT           |
| MA4_23R | Chr15 | 41961191  | T | C | 0.210884354 | MGA      | ENST00000566586_r73 | c.99 T>C     | p.N33N   | SILENT           |
| MA4_23R | Chr15 | 42148796  | T | A | 0.169491525 | SPTBN5   | ENST00000320955_r73 | c.8809 A>T   | p.N2937Y | MISSENSE         |
| MA4_23R | Chr15 | 43290373  | A | G | 0.095890411 | UBR1     | ENST00000290650_r73 | c.3750 T>C   | p.H1250H | SILENT           |
| MA4_23R | Chr15 | 48779352  | C | T | 0.262820513 | FBN1     | ENST00000316623_r73 | c.3509 G>A   | p.R1170H | MISSENSE         |
| MA4_23R | Chr15 | 51830647  | T | C | 0.303030303 | DMXL2    | ENST00000251076_r73 | c.1108 A>G   | p.I370V  | MISSENSE         |
| MA4_23R | Chr15 | 63597969  | C | T | 0.164705882 | APH1B    | ENST00000261879_r73 | c.763 C>T    | p.R255C  | MISSENSE         |
| MA4_23R | Chr15 | 64008623  | A | C | 0.156862745 | HERC1    | ENST00000443617_r73 | c.4028 T>G   | p.F1343C | MISSENSE         |
| MA4_23R | Chr15 | 73615695  | C | T | 0.186440678 | HCN4     | ENST00000261917_r73 | c.2739 G>A   | p.A913A  | SILENT           |
| MA4_23R | Chr15 | 74277048  | C | T | 0.202380952 | STOML1   | ENST00000564777_r73 | c.802 G>A    | p.V268I  | MISSENSE         |
| MA4_23R | Chr15 | 78393899  | A | G | 0.146067416 | SH2D7    | ENST00000328828_r73 | c.1304 A>G   | p.K435R  | MISSENSE         |
| MA4_23R | Chr15 | 78474907  | G | A | 0.133333333 | ACSBG1   | ENST00000258873_r73 | c.795 C>T    | p.D265D  | SILENT           |
| MA4_23R | Chr15 | 96877696  | G | A | 0.185185185 | NR2F2    | ENST00000421109_r73 | c.435 G>A    | p.S145S  | SILENT           |
| MA4_23R | Chr16 | 334920    | C | T | 0.164634146 | PDIA2    | ENST00000219406_r73 | c.583 C>T    | p.Q195*  | NONSENSE         |
| MA4_23R | Chr16 | 420061    | T | G | 0.202380952 | MRPL28   | ENST00000199706_r73 | c.158 A>C    | p.N53T   | MISSENSE         |
| MA4_23R | Chr16 | 630878    | C | T | 0.239130435 | PIGQ     | ENST00000409527_r73 | c.1437 C>T   | p.A479A  | SILENT           |
| MA4_23R | Chr16 | 1748888   | G | A | 0.194444444 | HN1L     | ENST00000248098_r73 | c.462 G>A    | p.Q154Q  | SILENT           |
| MA4_23R | Chr16 | 1837741   | C | T | 0.219178082 | NUBP2    | ENST00000262302_r73 | c.398 C>T    | p.T133M  | MISSENSE         |
| MA4_23R | Chr16 | 1841153   | G | A | 0.1         | IGFALS   | ENST00000215539_r73 | c.1266 C>T   | p.L422L  | SILENT           |
| MA4_23R | Chr16 | 2140954   | G | A | 0.190476191 | PKD1     | ENST00000262304_r73 | c.11934 C>T  | p.D3978D | SILENT           |
| MA4_23R | Chr16 | 2287651   | G | A | 0.162361624 | DNASE1L2 | ENST00000564065_r73 | Exon 4 1 G>A | -        | ESSENTIAL_SPLICE |
| MA4_23R | Chr16 | 2571122   | A | G | 0.150943396 | ATP6C    | ENST00000569317_r73 | c.217 A>G    | p.K73E   | MISSENSE         |
| MA4_23R | Chr16 | 2571122   | A | G | 0.150943396 | AMDHD2   | ENST00000302956_r73 | c.358 A>G    | p.K120E  | MISSENSE         |
| MA4_23R | Chr16 | 2816359   | C | T | 0.151260504 | SRRM2    | ENST00000301740_r73 | c.5830 C>T   | p.R1944C | MISSENSE         |
| MA4_23R | Chr16 | 3487431   | G | C | 0.184397163 | ZNF597   | ENST00000301744_r73 | c.268 C>G    | p.P90A   | MISSENSE         |
| MA4_23R | Chr16 | 11001797  | C | T | 0.12345679  | CIITA    | ENST00000324288_r73 | c.2448 C>T   | p.A816A  | SILENT           |

Sheet1

|         |       |          |   |   |             |               |                     |             |          |          |
|---------|-------|----------|---|---|-------------|---------------|---------------------|-------------|----------|----------|
| MA4_23R | Chr16 | 21213488 | C | T | 0.193181818 | ZP2           | ENST00000574002_r73 | c.1224 G>A  | p.E408E  | SILENT   |
| MA4_23R | Chr16 | 22144284 | C | A | 0.223880597 | VWA3A         | ENST00000389398_r73 | c.1936 C>A  | p.L646I  | MISSENSE |
| MA4_23R | Chr16 | 22182168 | C | T | 0.173913044 | SDR42E2       | ENST00000602312_r73 | c.307 C>T   | p.R103W  | MISSENSE |
| MA4_23R | Chr16 | 22201561 | A | G | 0.28358209  | SDR42E2       | ENST00000602312_r73 | c.1014 A>G  | p.L338L  | SILENT   |
| MA4_23R | Chr16 | 22826046 | T | G | 0.191304348 | HS3ST2        | ENST00000261374_r73 | c.115 T>G   | p.C39G   | MISSENSE |
| MA4_23R | Chr16 | 29063529 | C | T | 0.379310345 | CTB-134H23.2  | ENST00000424293_r73 | c.779 C>T   | p.S260F  | MISSENSE |
| MA4_23R | Chr16 | 29708436 | C | T | 0.134615385 | QPRT          | ENST00000395384_r73 | c.669 C>T   | p.N223N  | SILENT   |
| MA4_23R | Chr16 | 30975492 | C | T | 0.166666667 | SETD1A        | ENST00000262519_r73 | c.717 C>T   | p.N239N  | SILENT   |
| MA4_23R | Chr16 | 46766304 | C | T | 0.164179105 | MYLK3         | ENST00000394809_r73 | c.1278 G>A  | p.T426T  | SILENT   |
| MA4_23R | Chr16 | 57101678 | T | A | 0.17948718  | NLRC5         | ENST00000262510_r73 | c.4437 T>A  | p.D1479E | MISSENSE |
| MA4_23R | Chr16 | 72164240 | G | C | 0.274193548 | PMFBP1        | ENST00000237353_r73 | c.1654 C>G  | p.L552V  | MISSENSE |
| MA4_23R | Chr16 | 72170469 | G | A | 0.213483146 | PMFBP1        | ENST00000237353_r73 | c.1081 C>T  | p.R361W  | MISSENSE |
| MA4_23R | Chr16 | 72821625 | C | T | 0.229166667 | ZFH3          | ENST00000268489_r73 | c.10550 G>A | p.G3517D | MISSENSE |
| MA4_23R | Chr16 | 80583473 | C | T | 0.19205298  | DYNLRB2       | ENST00000305904_r73 | c.172 C>T   | p.R58C   | MISSENSE |
| MA4_23R | Chr16 | 87344867 | G | A | 0.154639175 | C16orf95      | ENST00000567970_r73 | c.366 C>T   | p.T122T  | SILENT   |
| MA4_23R | Chr17 | 2291323  | C | T | 0.168539326 | MNT           | ENST00000174618_r73 | c.828 G>A   | p.K276K  | SILENT   |
| MA4_23R | Chr17 | 2605278  | G | A | 0.190476191 | CLUH          | ENST00000570628_r73 | c.435 C>T   | p.S145S  | SILENT   |
| MA4_23R | Chr17 | 4689601  | A | G | 0.137096774 | VMO1          | ENST00000441199_r73 | c.47 T>C    | p.L16P   | MISSENSE |
| MA4_23R | Chr17 | 8146306  | T | C | 0.215686275 | CTC1          | ENST00000315684_r73 | c.194 A>G   | p.Y65C   | MISSENSE |
| MA4_23R | Chr17 | 15477417 | A | G | 0.196428571 | RP11-385D13.1 | ENST00000455584_r73 | c.2858 T>C  | p.L953P  | MISSENSE |
| MA4_23R | Chr17 | 18566585 | G | A | 0.164021164 | ZNF286B       | ENST00000545289_r73 | c.234 C>T   | p.S78S   | SILENT   |
| MA4_23R | Chr17 | 20354923 | G | A | 0.225806452 | LGALS9B       | ENST00000324290_r73 | c.792 C>T   | p.I264I  | SILENT   |
| MA4_23R | Chr17 | 21319267 | C | T | 0.072519084 | KCNJ12        | ENST00000583088_r73 | c.613 C>T   | p.R205C  | MISSENSE |
| MA4_23R | Chr17 | 31087609 | G | A | 0.185185185 | MYO1D         | ENST00000318217_r73 | c.1072 C>T  | p.R358C  | MISSENSE |
| MA4_23R | Chr17 | 34432664 | T | A | 0.176100629 | CCL4          | ENST00000250151_r73 | c.238 T>A   | p.S80T   | MISSENSE |
| MA4_23R | Chr17 | 38191515 | A | G | 0.213333333 | MED24         | ENST00000356271_r73 | c.375 T>C   | p.S125S  | SILENT   |
| MA4_23R | Chr17 | 42335379 | G | A | 0.149253731 | SLC4A1        | ENST00000262418_r73 | c.1257 C>T  | p.P419P  | SILENT   |
| MA4_23R | Chr17 | 45016025 | C | T | 0.05        | GOSR2         | ENST00000393456_r73 | c.538 C>T   | p.R180W  | MISSENSE |
| MA4_23R | Chr17 | 45016025 | C | T | 0.05        | RP11-156P1.2  | ENST00000571841_r73 | c.538 C>T   | p.R180W  | MISSENSE |
| MA4_23R | Chr17 | 58503639 | C | G | 0.205882353 | C17orf64      | ENST00000269127_r73 | c.271 C>G   | p.H91D   | MISSENSE |
| MA4_23R | Chr17 | 72349656 | C | T | 0.178010471 | KIF19         | ENST00000389916_r73 | c.2244 C>T  | p.G748G  | SILENT   |
| MA4_23R | Chr17 | 73830182 | C | T | 0.188679245 | UNC13D        | ENST00000207549_r73 | c.2341 G>A  | p.V781I  | MISSENSE |
| MA4_23R | Chr17 | 74005802 | C | T | 0.185714286 | EVPL          | ENST00000301607_r73 | c.3484 G>A  | p.E1162K | MISSENSE |
| MA4_23R | Chr17 | 76482177 | G | A | 0.210526316 | DNAH17        | ENST00000585328_r73 | c.7125 C>T  | p.I2375I | SILENT   |
| MA4_23R | Chr17 | 77769143 | C | T | 0.309859155 | CBX8          | ENST00000269385_r73 | c.461 G>A   | p.R154Q  | MISSENSE |
| MA4_23R | Chr17 | 80206865 | G | A | 0.2         | CSNK1D        | ENST00000314028_r73 | c.1083 C>T  | p.S361S  | SILENT   |
| MA4_23R | Chr18 | 6999496  | G | A | 0.218181818 | LAMA1         | ENST00000389658_r73 | c.4611 C>T  | p.L1537L | SILENT   |

Sheet1

|         |       |          |   |   |             |         |                     |            |          |          |
|---------|-------|----------|---|---|-------------|---------|---------------------|------------|----------|----------|
| MA4_23R | Chr18 | 9204535  | A | G | 0.22818792  | ANKRD12 | ENST00000262126_r73 | c.297 A>G  | p.T99T   | SILENT   |
| MA4_23R | Chr18 | 10485561 | G | A | 0.179310345 | APCDD1  | ENST00000355285_r73 | c.877 G>A  | p.G293R  | MISSENSE |
| MA4_23R | Chr18 | 13029750 | A | G | 0.168316832 | CEP192  | ENST00000506447_r73 | c.1139 A>G | p.N380S  | MISSENSE |
| MA4_23R | Chr18 | 34298589 | C | T | 0.185483871 | FHOD3   | ENST00000257209_r73 | c.2803 C>T | p.L935L  | SILENT   |
| MA4_23R | Chr18 | 46343626 | A | G | 0.183673469 | CTIF    | ENST00000256413_r73 | c.1406 A>G | p.Q469R  | MISSENSE |
| MA4_23R | Chr18 | 57013161 | T | A | 0.326530612 | LMAN1   | ENST00000251047_r73 | c.945 A>T  | p.Q315H  | MISSENSE |
| MA4_23R | Chr19 | 687035   | T | A | 0.174193548 | PRSS57  | ENST00000329267_r73 | c.535 A>T  | p.K179*  | NONSENSE |
| MA4_23R | Chr19 | 1010673  | G | A | 0.255319149 | TMEM259 | ENST00000356663_r73 | c.1539 C>T | p.P513P  | SILENT   |
| MA4_23R | Chr19 | 3942175  | C | T | 0.179104478 | NMRK2   | ENST00000168977_r73 | c.597 C>T  | p.A199A  | SILENT   |
| MA4_23R | Chr19 | 6183185  | C | A | 0.211864407 | ACSBG2  | ENST00000591403_r73 | c.1224 C>A | p.F408L  | MISSENSE |
| MA4_23R | Chr19 | 11508199 | C | T | 0.164556962 | RGL3    | ENST00000380456_r73 | c.1821 G>A | p.P607P  | SILENT   |
| MA4_23R | Chr19 | 11512897 | C | T | 0.2         | RGL3    | ENST00000380456_r73 | c.1356 G>A | p.R452R  | SILENT   |
| MA4_23R | Chr19 | 11618630 | G | A | 0.20952381  | ECSIT   | ENST00000270517_r73 | c.832 C>T  | p.R278C  | MISSENSE |
| MA4_23R | Chr19 | 12984928 | C | T | 0.234567901 | MAST1   | ENST00000251472_r73 | c.3957 C>T | p.G1319G | SILENT   |
| MA4_23R | Chr19 | 13218667 | G | A | 0.226890756 | TRMT1   | ENST00000221504_r73 | c.1317 C>T | p.A439A  | SILENT   |
| MA4_23R | Chr19 | 16962292 | A | G | 0.222222222 | SIN3B   | ENST00000379803_r73 | c.796 A>G  | p.S266G  | MISSENSE |
| MA4_23R | Chr19 | 19038597 | C | T | 0.191489362 | DDX49   | ENST00000247003_r73 | c.1125 C>T | p.S375S  | SILENT   |
| MA4_23R | Chr19 | 20989454 | T | C | 0.212765957 | ZNF66   | ENST00000344519_r73 | c.1048 T>C | p.F350L  | MISSENSE |
| MA4_23R | Chr19 | 21300018 | G | A | 0.164948454 | ZNF714  | ENST00000596143_r73 | c.548 G>A  | p.R183Q  | MISSENSE |
| MA4_23R | Chr19 | 22271303 | C | T | 0.206896552 | ZNF257  | ENST00000594947_r73 | c.751 C>T  | p.H251Y  | MISSENSE |
| MA4_23R | Chr19 | 35173717 | T | A | 0.135294118 | ZNF302  | ENST00000457781_r73 | c.45 T>A   | p.H15Q   | MISSENSE |
| MA4_23R | Chr19 | 39281364 | G | A | 0.208333333 | LGALS7B | ENST00000314980_r73 | c.131 G>A  | p.G44D   | MISSENSE |
| MA4_23R | Chr19 | 39880149 | C | T | 0.213333333 | PAF1    | ENST00000221265_r73 | c.330 G>A  | p.E110E  | SILENT   |
| MA4_23R | Chr19 | 40900136 | G | A | 0.225352113 | PRX     | ENST00000324001_r73 | c.4123 C>T | p.R1375W | MISSENSE |
| MA4_23R | Chr19 | 46915525 | C | T | 0.25        | CCDC8   | ENST00000307522_r73 | c.543 G>A  | p.E181E  | SILENT   |
| MA4_23R | Chr19 | 49116359 | T | C | 0.148648649 | FAM83E  | ENST00000263266_r73 | c.271 A>G  | p.T91A   | MISSENSE |
| MA4_23R | Chr19 | 49206550 | G | A | 0.175438597 | FUT2    | ENST00000425340_r73 | c.337 G>A  | p.V113M  | MISSENSE |
| MA4_23R | Chr19 | 54697199 | A | G | 0.296296296 | TSEN34  | ENST00000302937_r73 | c.915 A>G  | p.Q305Q  | SILENT   |
| MA4_23R | Chr19 | 54723078 | G | A | 0.134020619 | LILRB3  | ENST00000391750_r73 | c.1346 C>T | p.S449L  | MISSENSE |
| MA4_23R | Chr19 | 55237603 | G | A | 0.201680672 | KIR3DL3 | ENST00000291860_r73 | c.155 G>A  | p.R52H   | MISSENSE |
| MA4_23R | Chr19 | 55241172 | A | C | 0.128654971 | KIR3DL3 | ENST00000291860_r73 | c.869 A>C  | p.N290T  | MISSENSE |
| MA4_23R | Chr19 | 55246812 | G | C | 0.223880597 | KIR3DL3 | ENST00000291860_r73 | c.1042 G>C | p.A348P  | MISSENSE |
| MA4_23R | Chr19 | 55247449 | A | T | 0.217105263 | KIR3DL3 | ENST00000291860_r73 | c.1119 A>T | p.E373D  | MISSENSE |
| MA4_23R | Chr19 | 55255361 | G | A | 0.134502924 | KIR2DL3 | ENST00000342376_r73 | c.489 G>A  | p.E163E  | SILENT   |
| MA4_23R | Chr19 | 55317439 | C | T | 0.254237288 | KIR2DL4 | ENST00000359085_r73 | c.395 C>T  | p.P132L  | MISSENSE |
| MA4_23R | Chr19 | 55333275 | G | T | 0.150684932 | KIR3DL1 | ENST00000391728_r73 | c.911 G>T  | p.W304L  | MISSENSE |
| MA4_23R | Chr19 | 55363504 | G | A | 0.24822695  | KIR3DL2 | ENST00000326321_r73 | c.122 G>A  | p.R41Q   | MISSENSE |

Sheet1

|         |       |           |   |   |                       |                     |             |           |          |
|---------|-------|-----------|---|---|-----------------------|---------------------|-------------|-----------|----------|
| MA4_23R | Chr19 | 58117099  | G | C | 0.2 ZNF530            | ENST00000332854_r73 | c.206 G>C   | p.S69T    | MISSENSE |
| MA4_23R | Chr2  | 21258553  | T | A | 0.25 APOB             | ENST00000233242_r73 | c.721 A>T   | p.S241C   | MISSENSE |
| MA4_23R | Chr2  | 27303740  | C | T | 0.176470588 EMILIN1   | ENST00000380320_r73 | c.431 C>T   | p.P144L   | MISSENSE |
| MA4_23R | Chr2  | 28843469  | T | C | 0.157142857 PLB1      | ENST00000327757_r73 | c.3386 T>C  | p.I1129T  | MISSENSE |
| MA4_23R | Chr2  | 29274749  | C | T | 0.162601626 FAM179A   | ENST00000379558_r73 | c.2850 C>T  | p.R950R   | SILENT   |
| MA4_23R | Chr2  | 29416768  | G | A | 0.198412698 ALK       | ENST00000389048_r73 | c.4185 C>T  | p.T1395T  | SILENT   |
| MA4_23R | Chr2  | 47202156  | C | T | 0.274509804 TTC7A     | ENST00000319190_r73 | c.562 C>T   | p.R188C   | MISSENSE |
| MA4_23R | Chr2  | 61331001  | G | A | 0.146153846 KIAA1841  | ENST00000402291_r73 | c.1379 G>A  | p.R460K   | MISSENSE |
| MA4_23R | Chr2  | 65300035  | T | G | 0.175879397 CEP68     | ENST00000377990_r73 | c.1805 T>G  | p.F602C   | MISSENSE |
| MA4_23R | Chr2  | 71206851  | G | A | 0.172413793 ANKRD53   | ENST00000272421_r73 | c.478 G>A   | p.V160I   | MISSENSE |
| MA4_23R | Chr2  | 74699368  | G | A | 0.159763314 MRPL53    | ENST00000258105_r73 | c.217 C>T   | p.R73C    | MISSENSE |
| MA4_23R | Chr2  | 85780132  | C | T | 0.21969697 GGXX       | ENST00000233838_r73 | c.1217 G>A  | p.R406H   | MISSENSE |
| MA4_23R | Chr2  | 90121841  | C | A | 0.155339806 IGKV1D-17 | ENST00000483379_r73 | c.59 C>A    | p.A20D    | MISSENSE |
| MA4_23R | Chr2  | 111551680 | A | G | 0.157894737 ACOXL     | ENST00000439055_r73 | c.274 A>G   | p.M92V    | MISSENSE |
| MA4_23R | Chr2  | 112578860 | G | A | 0.25 ANAPC1           | ENST00000341068_r73 | c.3162 C>T  | p.Y1054Y  | SILENT   |
| MA4_23R | Chr2  | 127816628 | C | T | 0.1875 BIN1           | ENST00000357970_r73 | c.961 G>A   | p.G321R   | MISSENSE |
| MA4_23R | Chr2  | 133542131 | A | T | 0.157232704 NCKAP5    | ENST00000409261_r73 | c.2253 T>A  | p.V751V   | SILENT   |
| MA4_23R | Chr2  | 150427678 | T | C | 0.256410256 MMADHC    | ENST00000303319_r73 | c.617 A>G   | p.N206S   | MISSENSE |
| MA4_23R | Chr2  | 152320764 | A | G | 0.163043478 RIF1      | ENST00000444746_r73 | c.4730 A>G  | p.N1577S  | MISSENSE |
| MA4_23R | Chr2  | 165772426 | C | T | 0.177339902 SLC38A11  | ENST00000303735_r73 | c.441 G>A   | p.G147G   | SILENT   |
| MA4_23R | Chr2  | 179397368 | G | A | 0.18627451 TTN        | ENST00000342992_r73 | c.96270 C>T | p.I32090I | SILENT   |
| MA4_23R | Chr2  | 207003230 | C | T | 0.164835165 NDUFS1    | ENST00000233190_r73 | c.1371 G>A  | p.S457S   | SILENT   |
| MA4_23R | Chr2  | 209358019 | C | T | 0.238095238 PTH2R     | ENST00000272847_r73 | c.1288 C>T  | p.R430W   | MISSENSE |
| MA4_23R | Chr2  | 211018503 | T | C | 0.180257511 KANSL1L   | ENST00000281772_r73 | c.804 A>G   | p.Q268Q   | SILENT   |
| MA4_23R | Chr2  | 219414580 | C | T | 0.094017094 USP37     | ENST00000258399_r73 | c.381 G>A   | p.R127R   | SILENT   |
| MA4_23R | Chr2  | 220161758 | C | T | 0.237288136 PTPRN     | ENST00000409251_r73 | c.2098 G>A  | p.A700T   | MISSENSE |
| MA4_23R | Chr2  | 220493959 | G | A | 0.346938776 SLC4A3    | ENST00000358055_r73 | c.311 G>A   | p.R104Q   | MISSENSE |
| MA4_23R | Chr2  | 225661080 | A | C | 0.211640212 DOCK10    | ENST00000258390_r73 | c.4891 T>G  | p.S1631A  | MISSENSE |
| MA4_23R | Chr2  | 228855865 | G | A | 0.196581197 SPHKAP    | ENST00000392056_r73 | c.4810 C>T  | p.P1604S  | MISSENSE |
| MA4_23R | Chr2  | 230723502 | T | C | 0.141025641 TRIP12    | ENST00000283943_r73 | c.887 A>G   | p.Q296R   | MISSENSE |
| MA4_23R | Chr2  | 233413012 | G | A | 0.409090909 TIGD1     | ENST00000408957_r73 | c.1581 C>T  | p.I527I   | SILENT   |
| MA4_23R | Chr2  | 238449108 | G | T | 0.394736842 MLPH      | ENST00000264605_r73 | c.1222 G>T  | p.A408S   | MISSENSE |
| MA4_23R | Chr2  | 242371116 | T | C | 0.173913044 FARP2     | ENST00000264042_r73 | c.794 T>C   | p.F265S   | MISSENSE |
| MA4_23R | Chr20 | 633682    | T | C | 0.243902439 SRXN1     | ENST00000381962_r73 | c.148 A>G   | p.I50V    | MISSENSE |
| MA4_23R | Chr20 | 3687772   | C | T | 0.273972603 SIGLEC1   | ENST00000344754_r73 | c.4 G>A     | p.G2S     | MISSENSE |
| MA4_23R | Chr20 | 13280052  | G | A | 0.106382979 ISM1      | ENST00000262487_r73 | c.1341 G>A  | p.E447E   | SILENT   |
| MA4_23R | Chr20 | 33875140  | C | T | 0.136752137 FAM83C    | ENST00000374408_r73 | c.1442 G>A  | p.G481D   | MISSENSE |

Sheet1

|         |       |           |   |   |             |              |                     |               |          |                  |
|---------|-------|-----------|---|---|-------------|--------------|---------------------|---------------|----------|------------------|
| MA4_23R | Chr20 | 39831546  | C | T | 0.188571429 | ZHX3         | ENST00000309060_r73 | c.2011 G>A    | p.E671K  | MISSENSE         |
| MA4_23R | Chr20 | 43727834  | C | T | 0.337209302 | KCNS1        | ENST00000306117_r73 | c.44 G>A      | p.R15Q   | MISSENSE         |
| MA4_23R | Chr20 | 57246312  | A | C | 0.112244898 | STX16        | ENST00000355957_r73 | c.700 A>C     | p.N234H  | MISSENSE         |
| MA4_23R | Chr20 | 57246312  | A | C | 0.112244898 | STX16-NPEPL1 | ENST00000530122_r73 | c.751 A>C     | p.N251H  | MISSENSE         |
| MA4_23R | Chr20 | 57571837  | C | T | 0.284023669 | CTSZ         | ENST00000217131_r73 | c.658 G>A     | p.E220K  | MISSENSE         |
| MA4_23R | Chr20 | 61459319  | C | T | 0.213483146 | COL9A3       | ENST00000343916_r73 | c.891 C>T     | p.S297S  | SILENT           |
| MA4_23R | Chr20 | 62195536  | G | A | 0.188679245 | HELZ2        | ENST00000427522_r73 | c.2932 C>T    | p.R978W  | MISSENSE         |
| MA4_23R | Chr21 | 30380903  | G | A | 0.142857143 | RWDD2B       | ENST00000493196_r73 | c.107 C>T     | p.A36V   | MISSENSE         |
| MA4_23R | Chr21 | 34837660  | A | G | 0.202898551 | TMEM50B      | ENST00000420455_r73 | c.269 T>C     | p.L90S   | MISSENSE         |
| MA4_23R | Chr21 | 34922515  | G | A | 0.194444444 | SON          | ENST00000356577_r73 | c.978 G>A     | p.M326I  | MISSENSE         |
| MA4_23R | Chr21 | 40552338  | T | G | 0.139705882 | PSMG1        | ENST00000331573_r73 | c.266 A>C     | p.N89T   | MISSENSE         |
| MA4_23R | Chr21 | 43240044  | G | A | 0.191489362 | PRDM15       | ENST00000398548_r73 | c.2265 C>T    | p.H755H  | SILENT           |
| MA4_23R | Chr22 | 23523753  | C | T | 0.195121951 | BCR          | ENST00000305877_r73 | c.606 C>T     | p.S202S  | SILENT           |
| MA4_23R | Chr22 | 29876996  | G | A | 0.25        | NEFH         | ENST00000310624_r73 | c.745 G>A     | p.G249S  | MISSENSE         |
| MA4_23R | Chr22 | 32909761  | C | G | 0.223529412 | SYN3         | ENST00000358763_r73 | c.1661 G>C    | p.R554P  | MISSENSE         |
| MA4_23R | Chr22 | 37414181  | A | G | 0.461538462 | TST          | ENST00000403892_r73 | c.593 T>C     | p.V198A  | MISSENSE         |
| MA4_23R | Chr22 | 37890166  | C | A | 0.166666667 | CARD10       | ENST00000403299_r73 | c.2403 G>T    | p.R801R  | SILENT           |
| MA4_23R | Chr22 | 38211281  | C | G | 0.235294118 | GCAT         | ENST00000323205_r73 | c.803 C>G     | p.T268R  | MISSENSE         |
| MA4_23R | Chr22 | 39621819  | G | A | 0.1875      | PDGFB        | ENST00000331163_r73 | c.635 C>T     | p.T212M  | MISSENSE         |
| MA4_23R | Chr22 | 39917587  | C | T | 0.205882353 | ATF4         | ENST00000404241_r73 | c.137 C>T     | p.P46L   | MISSENSE         |
| MA4_23R | Chr22 | 45255677  | A | G | 0.166666667 | PRR5-ARHGAP8 | ENST00000361473_r73 | c.1337 A>G    | p.Y446C  | MISSENSE         |
| MA4_23R | Chr22 | 45255677  | A | G | 0.166666667 | ARHGAP8      | ENST00000389774_r73 | c.1037 A>G    | p.Y346C  | MISSENSE         |
| MA4_23R | Chr22 | 46658198  | A | G | 0.253012048 | PKDREJ       | ENST00000253255_r73 | c.1022 T>C    | p.L341P  | MISSENSE         |
| MA4_23R | Chr22 | 50885863  | C | T | 0.212765957 | SBF1         | ENST00000380817_r73 | c.5471 G>A    | p.R1824H | MISSENSE         |
| MA4_23R | Chr3  | 16358506  | A | G | 0.08974359  | RFTN1        | ENST00000334133_r73 | c.1566 T>C    | p.P522P  | SILENT           |
| MA4_23R | Chr3  | 32995349  | C | T | 0.192090396 | CCR4         | ENST00000330953_r73 | c.435 C>T     | p.S145S  | SILENT           |
| MA4_23R | Chr3  | 40557438  | G | A | 0.196969697 | ZNF620       | ENST00000314529_r73 | c.353 G>A     | p.G118D  | MISSENSE         |
| MA4_23R | Chr3  | 46008939  | G | A | 0.192307692 | FYCO1        | ENST00000296137_r73 | c.1887 C>T    | p.V629V  | SILENT           |
| MA4_23R | Chr3  | 49060313  | C | T | 0.25974026  | NDUFAF3      | ENST00000326912_r73 | c.171 C>T     | p.I57I   | SILENT           |
| MA4_23R | Chr3  | 49837207  | C | T | 0.192771084 | CDHR4        | ENST00000412678_r73 | c.39 G>A      | p.P13P   | SILENT           |
| MA4_23R | Chr3  | 49850929  | A | G | 0.25        | UBA7         | ENST00000333486_r73 | c.208 T>C     | p.S70P   | MISSENSE         |
| MA4_23R | Chr3  | 52283025  | C | T | 0.175572519 | PPM1M        | ENST00000409502_r73 | c.396 C>T     | p.L132L  | SILENT           |
| MA4_23R | Chr3  | 52398913  | A | G | 0.154589372 | DNAH1        | ENST00000420323_r73 | c.5396 A>G    | p.K1799R | MISSENSE         |
| MA4_23R | Chr3  | 52661351  | G | A | 0.235294118 | PBRM1        | ENST00000394830_r73 | c.1479 C>T    | p.I493I  | SILENT           |
| MA4_23R | Chr3  | 52858459  | G | A | 0.264285714 | ITIH4        | ENST00000266041_r73 | c.999 C>T     | p.N333N  | SILENT           |
| MA4_23R | Chr3  | 101571742 | C | G | 0.192546584 | NFKBIZ       | ENST00000394054_r73 | c.173 C>G     | p.T58R   | MISSENSE         |
| MA4_23R | Chr3  | 108781994 | C | T | 0.151898734 | MORC1        | ENST00000232603_r73 | Exon 10 5 G>A | -        | ESSENTIAL_SPLICE |

Sheet1

|         |      |           |   |   |             |            |                     |             |          |          |
|---------|------|-----------|---|---|-------------|------------|---------------------|-------------|----------|----------|
| MA4_23R | Chr3 | 122420142 | G | A | 0.220994475 | PARP14     | ENST00000474629_r73 | c.2741 G>A  | p.R914Q  | MISSENSE |
| MA4_23R | Chr3 | 132196983 | G | A | 0.16        | DNAJC13    | ENST00000260818_r73 | c.2708 G>A  | p.R903K  | MISSENSE |
| MA4_23R | Chr3 | 145782480 | A | G | 0.227272727 | AC107021.1 | ENST00000422482_r73 | c.101 A>G   | p.H34R   | MISSENSE |
| MA4_23R | Chr3 | 150834162 | A | G | 0.183206107 | MED12L     | ENST00000474524_r73 | c.137 A>G   | p.N46S   | MISSENSE |
| MA4_23R | Chr3 | 169485469 | G | A | 0.189655172 | ACTRT3     | ENST00000330368_r73 | c.870 C>T   | p.F290F  | SILENT   |
| MA4_23R | Chr3 | 184071136 | G | A | 0.227722772 | CLCN2      | ENST00000265593_r73 | c.1930 C>T  | p.R644C  | MISSENSE |
| MA4_23R | Chr3 | 184101429 | C | T | 0.243243243 | CHRD       | ENST00000204604_r73 | c.1439 C>T  | p.T480M  | MISSENSE |
| MA4_23R | Chr3 | 193081090 | C | T | 0.1875      | ATP13A5    | ENST00000342358_r73 | c.319 G>A   | p.E107K  | MISSENSE |
| MA4_23R | Chr4 | 1388564   | T | C | 0.272727273 | CRIPAK     | ENST00000324803_r73 | c.265 T>C   | p.C89R   | MISSENSE |
| MA4_23R | Chr4 | 6303769   | G | A | 0.201970443 | WFS1       | ENST00000503569_r73 | c.2247 G>A  | p.T749T  | SILENT   |
| MA4_23R | Chr4 | 17841383  | A | G | 0.210526316 | NCAPG      | ENST00000251496_r73 | c.2551 A>G  | p.T851A  | MISSENSE |
| MA4_23R | Chr4 | 40339286  | C | G | 0.157894737 | CHRNA9     | ENST00000310169_r73 | c.270 C>G   | p.A90A   | SILENT   |
| MA4_23R | Chr4 | 48844693  | A | T | 0.235294118 | OCIAD1     | ENST00000264312_r73 | c.180 A>T   | p.G60G   | SILENT   |
| MA4_23R | Chr4 | 56847506  | A | G | 0.227722772 | CEP135     | ENST00000257287_r73 | c.1740 A>G  | p.R580R  | SILENT   |
| MA4_23R | Chr4 | 70146902  | T | C | 0.4375      | UGT2B28    | ENST00000335568_r73 | c.684 T>C   | p.D228D  | SILENT   |
| MA4_23R | Chr4 | 89300241  | C | A | 0.404761905 | HERC6      | ENST00000380265_r73 | c.168 C>A   | p.G56G   | SILENT   |
| MA4_23R | Chr4 | 91230194  | A | C | 0.230769231 | CCSER1     | ENST00000509176_r73 | c.759 A>C   | p.T253T  | SILENT   |
| MA4_23R | Chr4 | 106190798 | G | A | 0.101941748 | TET2       | ENST00000380013_r73 | c.4076 G>A  | p.R1359H | MISSENSE |
| MA4_23R | Chr4 | 122062982 | G | A | 0.189189189 | TNIP3      | ENST00000057513_r73 | c.874 C>T   | p.R292W  | MISSENSE |
| MA4_23R | Chr4 | 141446698 | T | G | 0.177514793 | ELMOD2     | ENST00000323570_r73 | c.116 T>G   | p.V39G   | MISSENSE |
| MA4_23R | Chr4 | 144922436 | T | G | 0.063926941 | GYPB       | ENST00000502664_r73 | c.38 A>C    | p.E13A   | MISSENSE |
| MA4_23R | Chr4 | 154626370 | C | T | 0.173913044 | TLR2       | ENST00000260010_r73 | c.2311 C>T  | p.R771W  | MISSENSE |
| MA4_23R | Chr4 | 155490820 | A | G | 0.216216216 | FGB        | ENST00000302068_r73 | c.1113 A>G  | p.S371S  | SILENT   |
| MA4_23R | Chr5 | 428022    | C | T | 0.176470588 | AHRR       | ENST00000505113_r73 | c.821 C>T   | p.A274V  | MISSENSE |
| MA4_23R | Chr5 | 1087084   | G | A | 0.135483871 | SLC12A7    | ENST00000264930_r73 | c.609 C>T   | p.L203L  | SILENT   |
| MA4_23R | Chr5 | 1217004   | G | A | 0.174603175 | SLC6A19    | ENST00000304460_r73 | c.1117 G>A  | p.A373T  | MISSENSE |
| MA4_23R | Chr5 | 13717485  | G | A | 0.145833333 | DNAH5      | ENST00000265104_r73 | c.12644 C>T | p.A4215V | MISSENSE |
| MA4_23R | Chr5 | 32058127  | C | T | 0.126213592 | PDZD2      | ENST00000438447_r73 | c.2118 C>T  | p.S706S  | SILENT   |
| MA4_23R | Chr5 | 93966286  | G | A | 0.142857143 | ANKRD32    | ENST00000265140_r73 | c.269 G>A   | p.W90*   | NONSENSE |
| MA4_23R | Chr5 | 107717088 | C | T | 0.217391304 | FBXL17     | ENST00000542267_r73 | c.305 G>A   | p.R102Q  | MISSENSE |
| MA4_23R | Chr5 | 126755873 | G | A | 0.098591549 | MEGF10     | ENST00000503335_r73 | c.1564 G>A  | p.G522R  | MISSENSE |
| MA4_23R | Chr5 | 131008132 | T | C | 0.179661017 | FNIP1      | ENST00000307968_r73 | c.1921 A>G  | p.K641E  | MISSENSE |
| MA4_23R | Chr5 | 131329826 | C | G | 0.189473684 | ACSL6      | ENST00000379264_r73 | c.168 G>C   | p.V56V   | SILENT   |
| MA4_23R | Chr5 | 132150837 | C | G | 0.140186916 | SOWAHA     | ENST00000378693_r73 | c.1524 C>G  | p.A508A  | SILENT   |
| MA4_23R | Chr5 | 133473774 | G | A | 0.307692308 | TCF7       | ENST00000342854_r73 | c.466 G>A   | p.G156S  | MISSENSE |
| MA4_23R | Chr5 | 138260288 | C | T | 0.297297297 | CTNNA1     | ENST00000302763_r73 | c.1636 C>T  | p.R546*  | NONSENSE |
| MA4_23R | Chr5 | 139060486 | G | A | 0.159763314 | CXXC5      | ENST00000302517_r73 | c.378 G>A   | p.A126A  | SILENT   |

Sheet1

|         |      |           |   |   |             |          |                     |             |          |          |
|---------|------|-----------|---|---|-------------|----------|---------------------|-------------|----------|----------|
| MA4_23R | Chr5 | 139714273 | A | G | 0.156028369 | HBEGF    | ENST00000230990_r73 | c.615 T>C   | p.T205T  | SILENT   |
| MA4_23R | Chr5 | 145843260 | T | C | 0.131428571 | TCERG1   | ENST00000296702_r73 | c.1039 T>C  | p.S347P  | MISSENSE |
| MA4_23R | Chr5 | 149578896 | C | T | 0.164179105 | SLC6A7   | ENST00000230671_r73 | c.690 C>T   | p.L230L  | SILENT   |
| MA4_23R | Chr5 | 162939175 | A | G | 0.205882353 | MAT2B    | ENST00000280969_r73 | c.198 A>G   | p.A66A   | SILENT   |
| MA4_23R | Chr5 | 167630831 | A | C | 0.183673469 | TENM2    | ENST00000518659_r73 | c.3568 A>C  | p.K1190Q | MISSENSE |
| MA4_23R | Chr5 | 171509391 | C | T | 0.104651163 | STK10    | ENST00000176763_r73 | c.1928 G>A  | p.R643H  | MISSENSE |
| MA4_23R | Chr5 | 174869692 | G | C | 0.192307692 | DRD1     | ENST00000393752_r73 | c.411 C>G   | p.P137P  | SILENT   |
| MA4_23R | Chr5 | 176832999 | T | C | 0.113636364 | F12      | ENST00000253496_r73 | c.179 A>G   | p.K60R   | MISSENSE |
| MA4_23R | Chr5 | 178358521 | G | T | 0.161290323 | ZFP2     | ENST00000361362_r73 | c.207 G>T   | p.M69I   | MISSENSE |
| MA4_23R | Chr5 | 179260201 | G | A | 0.176470588 | SQSTM1   | ENST00000389805_r73 | c.924 G>A   | p.A308A  | SILENT   |
| MA4_23R | Chr6 | 656694    | G | C | 0.182926829 | HUS1B    | ENST00000380907_r73 | c.251 C>G   | p.A84G   | MISSENSE |
| MA4_23R | Chr6 | 10634514  | C | T | 0.202702703 | GCNT6    | ENST00000379591_r73 | c.357 C>T   | p.A119A  | SILENT   |
| MA4_23R | Chr6 | 26156843  | G | A | 0.210526316 | HIST1H1E | ENST00000304218_r73 | c.225 G>A   | p.K75K   | SILENT   |
| MA4_23R | Chr6 | 31779134  | T | C | 0.205479452 | HSPA1L   | ENST00000375654_r73 | c.616 A>G   | p.T206A  | MISSENSE |
| MA4_23R | Chr6 | 32905086  | G | A | 0.168316832 | HLA-DMB  | ENST00000418107_r73 | c.485 C>T   | p.A162V  | MISSENSE |
| MA4_23R | Chr6 | 34208668  | C | T | 0.227272727 | HMGA1    | ENST00000311487_r73 | c.111 C>T   | p.P37P   | SILENT   |
| MA4_23R | Chr6 | 35262346  | G | A | 0.132075472 | ZNF76    | ENST00000373953_r73 | c.1608 G>A  | p.Q536Q  | SILENT   |
| MA4_23R | Chr6 | 41754576  | C | T | 0.202380952 | PRICKLE4 | ENST00000335515_r73 | c.864 C>T   | p.L288L  | SILENT   |
| MA4_23R | Chr6 | 42072274  | C | T | 0.193548387 | C6orf132 | ENST00000341865_r73 | c.3376 G>A  | p.A1126T | MISSENSE |
| MA4_23R | Chr6 | 51889823  | G | A | 0.191358025 | PKHD1    | ENST00000371117_r73 | c.4785 C>T  | p.G1595G | SILENT   |
| MA4_23R | Chr6 | 54804720  | C | T | 0.223776224 | FAM83B   | ENST00000306858_r73 | c.951 C>T   | p.S317S  | SILENT   |
| MA4_23R | Chr6 | 84871572  | G | A | 0.24137931  | KIAA1009 | ENST00000403245_r73 | c.2569 C>T  | p.R857C  | MISSENSE |
| MA4_23R | Chr6 | 109764598 | A | T | 0.2734375   | SMPD2    | ENST00000258052_r73 | c.858 A>T   | p.P286P  | SILENT   |
| MA4_23R | Chr6 | 126080448 | T | C | 0.136363636 | HEY2     | ENST00000368364_r73 | c.514 T>C   | p.S172P  | MISSENSE |
| MA4_23R | Chr6 | 131919806 | G | A | 0.174757282 | MED23    | ENST00000354577_r73 | c.2334 C>T  | p.N778N  | SILENT   |
| MA4_23R | Chr6 | 137479526 | G | A | 0.220779221 | IL22RA2  | ENST00000349184_r73 | c.155 C>T   | p.A52V   | MISSENSE |
| MA4_23R | Chr6 | 142539730 | G | A | 0.197802198 | VTA1     | ENST00000367630_r73 | c.874 G>A   | p.V292I  | MISSENSE |
| MA4_23R | Chr6 | 154481128 | C | T | 0.2         | IPCEF1   | ENST00000265198_r73 | c.1149 G>A  | p.P383P  | SILENT   |
| MA4_23R | Chr7 | 4722377   | G | A | 0.36        | FOXK1    | ENST00000328914_r73 | c.438 G>A   | p.R146R  | SILENT   |
| MA4_23R | Chr7 | 4824597   | C | T | 0.219512195 | AP5Z1    | ENST00000348624_r73 | c.849 C>T   | p.A283A  | SILENT   |
| MA4_23R | Chr7 | 5434174   | C | G | 0.166666667 | TNRC18   | ENST00000430969_r73 | c.240 G>C   | p.S80S   | SILENT   |
| MA4_23R | Chr7 | 21893969  | G | C | 0.259615385 | DNAH11   | ENST00000409508_r73 | c.11098 G>C | p.E3700Q | MISSENSE |
| MA4_23R | Chr7 | 26192248  | G | A | 0.390243902 | NFE2L3   | ENST00000056233_r73 | c.130 G>A   | p.D44N   | MISSENSE |
| MA4_23R | Chr7 | 26224382  | C | T | 0.066371681 | NFE2L3   | ENST00000056233_r73 | c.1064 C>T  | p.T355I  | MISSENSE |
| MA4_23R | Chr7 | 47409029  | G | A | 0.261904762 | TNS3     | ENST00000311160_r73 | c.1214 C>T  | p.T405M  | MISSENSE |
| MA4_23R | Chr7 | 48314389  | T | C | 0.266666667 | ABCA13   | ENST00000435803_r73 | c.5126 T>C  | p.L1709P | MISSENSE |
| MA4_23R | Chr7 | 100356262 | G | C | 0.142857143 | ZAN      | ENST00000349350_r73 | c.3560 G>C  | p.G1187A | MISSENSE |



Sheet1

|         |      |           |   |   |             |              |                     |             |          |          |
|---------|------|-----------|---|---|-------------|--------------|---------------------|-------------|----------|----------|
| MA4_23R | Chr7 | 100643477 | A | C | 0.074829932 | MUC12        | ENST00000536621_r73 | c.9633 A>C  | p.S3211S | SILENT   |
| MA4_23R | Chr7 | 100645731 | G | A | 0.111111111 | MUC12        | ENST00000536621_r73 | c.11887 G>A | p.E3963K | MISSENSE |
| MA4_23R | Chr7 | 100855576 | G | A | 0.171428571 | PLOD3        | ENST00000223127_r73 | c.1085 C>T  | p.P362L  | MISSENSE |
| MA4_23R | Chr7 | 117243823 | C | T | 0.167567568 | CFTR         | ENST00000003084_r73 | c.2895 C>T  | p.N965N  | SILENT   |
| MA4_23R | Chr7 | 121944279 | G | A | 0.159624413 | FEZF1        | ENST00000442488_r73 | c.213 C>T   | p.I71I   | SILENT   |
| MA4_23R | Chr7 | 139257887 | C | T | 0.163265306 | HIPK2        | ENST00000406875_r73 | c.3383 G>A  | p.R1128H | MISSENSE |
| MA4_23R | Chr7 | 140287517 | G | A | 0.189873418 | DENND2A      | ENST00000275884_r73 | c.1059 C>T  | p.Y353Y  | SILENT   |
| MA4_23R | Chr7 | 148904547 | A | G | 0.14516129  | ZNF282       | ENST00000262085_r73 | c.817 A>G   | p.M273V  | MISSENSE |
| MA4_23R | Chr7 | 150713295 | G | C | 0.17948718  | ATG9B        | ENST00000377974_r73 | c.2546 C>G  | p.P849R  | MISSENSE |
| MA4_23R | Chr7 | 150716160 | T | C | 0.158878505 | ATG9B        | ENST00000377974_r73 | c.1265 A>G  | p.Y422C  | MISSENSE |
| MA4_23R | Chr8 | 8185328   | C | T | 0.220183486 | SGK223       | ENST00000520004_r73 | c.2964 G>A  | p.S988S  | SILENT   |
| MA4_23R | Chr8 | 8235510   | G | C | 0.151898734 | SGK223       | ENST00000520004_r73 | c.409 C>G   | p.R137G  | MISSENSE |
| MA4_23R | Chr8 | 8560176   | G | A | 0.212121212 | CLDN23       | ENST00000519106_r73 | c.268 G>A   | p.A90T   | MISSENSE |
| MA4_23R | Chr8 | 9009379   | G | A | 0.25        | RP11-10A14.4 | ENST00000518496_r73 | c.21 G>A    | p.K7K    | SILENT   |
| MA4_23R | Chr8 | 11659451  | G | C | 0.428571429 | RP11-297N6.4 | ENST00000533405_r73 | c.146 C>G   | p.A49G   | MISSENSE |
| MA4_23R | Chr8 | 12957678  | C | T | 0.174863388 | DLC1         | ENST00000276297_r73 | c.2168 G>A  | p.R723H  | MISSENSE |
| MA4_23R | Chr8 | 22548277  | C | T | 0.137931035 | EGR3         | ENST00000317216_r73 | c.873 G>A   | p.E291E  | SILENT   |
| MA4_23R | Chr8 | 28671031  | A | C | 0.189393939 | INTS9        | ENST00000521022_r73 | c.587 T>G   | p.L196R  | MISSENSE |
| MA4_23R | Chr8 | 28929820  | A | C | 0.17948718  | KIF13B       | ENST00000524189_r73 | c.4535 T>G  | p.M1512R | MISSENSE |
| MA4_23R | Chr8 | 68028331  | C | T | 0.269662921 | CSPP1        | ENST00000262210_r73 | c.1455 C>T  | p.S485S  | SILENT   |
| MA4_23R | Chr8 | 98656775  | C | T | 0.225806452 | MTDH         | ENST00000336273_r73 | c.41 C>T    | p.A14V   | MISSENSE |
| MA4_23R | Chr8 | 103372358 | G | A | 0.181818182 | UBR5         | ENST00000520539_r73 | c.327 C>T   | p.D109D  | SILENT   |
| MA4_23R | Chr8 | 110302077 | A | T | 0.183206107 | NUDCD1       | ENST00000239690_r73 | c.726 T>A   | p.N242K  | MISSENSE |
| MA4_23R | Chr8 | 126052103 | T | C | 0.242105263 | KIAA0196     | ENST00000318410_r73 | c.2888 A>G  | p.N963S  | MISSENSE |
| MA4_23R | Chr8 | 144332046 | G | A | 0.107142857 | ZFP41        | ENST00000520584_r73 | c.33 G>A    | p.T11T   | SILENT   |
| MA4_23R | Chr8 | 144332046 | G | A | 0.107142857 | ZFP41        | ENST00000522452_r73 | c.33 G>A    | p.T11T   | SILENT   |
| MA4_23R | Chr8 | 144810572 | G | A | 0.150684932 | FAM83H       | ENST00000388913_r73 | c.1059 C>T  | p.A353A  | SILENT   |
| MA4_23R | Chr8 | 145748360 | G | C | 0.195402299 | LRRRC24      | ENST00000529415_r73 | c.1041 C>G  | p.A347A  | SILENT   |
| MA4_23R | Chr9 | 6012864   | C | T | 0.073033708 | RANBP6       | ENST00000259569_r73 | c.2744 G>A  | p.R915Q  | MISSENSE |
| MA4_23R | Chr9 | 19409094  | G | C | 0.191489362 | ACER2        | ENST00000340967_r73 | c.12 G>C    | p.P4P    | SILENT   |
| MA4_23R | Chr9 | 34690000  | C | T | 0.166666667 | CCL19        | ENST00000311925_r73 | c.203 G>A   | p.R68H   | MISSENSE |
| MA4_23R | Chr9 | 34993437  | G | A | 0.178571429 | DNAJB5       | ENST00000453597_r73 | c.549 G>A   | p.E183E  | SILENT   |
| MA4_23R | Chr9 | 79635269  | C | T | 0.410958904 | FOXB2        | ENST00000376708_r73 | c.699 C>T   | p.A233A  | SILENT   |
| MA4_23R | Chr9 | 95177598  | T | C | 0.140625    | OMD          | ENST00000375550_r73 | c.1102 A>G  | p.T368A  | MISSENSE |
| MA4_23R | Chr9 | 96860820  | G | A | 0.152777778 | PTPDC1       | ENST00000375360_r73 | c.1810 G>A  | p.V604I  | MISSENSE |
| MA4_23R | Chr9 | 100112770 | C | T | 0.186046512 | CCDC180      | ENST00000529487_r73 | c.3067 C>T  | p.R1023W | MISSENSE |
| MA4_23R | Chr9 | 121930252 | C | T | 0.308411215 | DBC1         | ENST00000265922_r73 | c.1396 G>A  | p.V466M  | MISSENSE |

Sheet1

|         |      |           |   |   |             |         |                     |            |          |          |
|---------|------|-----------|---|---|-------------|---------|---------------------|------------|----------|----------|
| MA4_23R | Chr9 | 125486542 | A | G | 0.123167155 | OR1L4   | ENST00000259466_r73 | c.274 A>G  | p.I92V   | MISSENSE |
| MA4_23R | Chr9 | 131768786 | G | A | 0.154929578 | NUP188  | ENST00000372577_r73 | c.5079 G>A | p.T1693T | SILENT   |
| MA4_23R | Chr9 | 137711997 | G | A | 0.171974522 | COL5A1  | ENST00000371817_r73 | c.4482 G>A | p.P1494P | SILENT   |
| MA4_23R | Chr9 | 139636334 | G | A | 0.166666667 | LCN10   | ENST00000497771_r73 | c.256 C>T  | p.R86W   | MISSENSE |
| MA4_23R | Chr9 | 139935576 | C | T | 0.175675676 | NPDC1   | ENST00000371601_r73 | c.323 G>A  | p.R108Q  | MISSENSE |
| MA4_23R | ChrX | 2777948   | A | T | 0.186813187 | GYG2    | ENST00000398806_r73 | c.679 A>T  | p.N227Y  | MISSENSE |
| MA4_23R | ChrX | 2825403   | A | G | 0.175572519 | ARSD    | ENST00000381154_r73 | c.1691 T>C | p.M564T  | MISSENSE |
| MA4_23R | ChrX | 2836037   | G | C | 0.223684211 | ARSD    | ENST00000381154_r73 | c.671 C>G  | p.S224C  | MISSENSE |
| MA4_23R | ChrX | 2951348   | A | G | 0.4         | ARSH    | ENST00000381130_r73 | c.1611 A>G | p.P537P  | SILENT   |
| MA4_23R | ChrX | 3002687   | A | G | 0.382978723 | ARSF    | ENST00000381127_r73 | c.810 A>G  | p.E270E  | SILENT   |
| MA4_23R | ChrX | 3228411   | G | A | 0.755555556 | MXRA5   | ENST00000217939_r73 | c.7833 C>T | p.A2611A | SILENT   |
| MA4_23R | ChrX | 3228891   | A | G | 0.471428571 | MXRA5   | ENST00000217939_r73 | c.7353 T>C | p.T2451T | SILENT   |
| MA4_23R | ChrX | 3235724   | C | T | 0.727272727 | MXRA5   | ENST00000217939_r73 | c.5998 G>A | p.G2000S | MISSENSE |
| MA4_23R | ChrX | 3239545   | C | T | 0.523809524 | MXRA5   | ENST00000217939_r73 | c.4181 G>A | p.G1394D | MISSENSE |
| MA4_23R | ChrX | 3240343   | G | A | 0.546875    | MXRA5   | ENST00000217939_r73 | c.3383 C>T | p.A1128V | MISSENSE |
| MA4_23R | ChrX | 3241050   | G | A | 0.642857143 | MXRA5   | ENST00000217939_r73 | c.2676 C>T | p.S892S  | SILENT   |
| MA4_23R | ChrX | 3241256   | T | C | 0.338235294 | MXRA5   | ENST00000217939_r73 | c.2470 A>G | p.I824V  | MISSENSE |
| MA4_23R | ChrX | 3241317   | T | C | 0.37704918  | MXRA5   | ENST00000217939_r73 | c.2409 A>G | p.P803P  | SILENT   |
| MA4_23R | ChrX | 3241791   | G | A | 0.471698113 | MXRA5   | ENST00000217939_r73 | c.1935 C>T | p.D645D  | SILENT   |
| MA4_23R | ChrX | 3592725   | G | A | 0.492753623 | PRKX    | ENST00000262848_r73 | c.249 C>T  | p.P83P   | SILENT   |
| MA4_23R | ChrX | 3631167   | A | G | 0.45945946  | PRKX    | ENST00000262848_r73 | c.128 T>C  | p.V43A   | MISSENSE |
| MA4_23R | ChrX | 7889828   | C | T | 0.306122449 | PNPLA4  | ENST00000381042_r73 | c.337 G>A  | p.V113I  | MISSENSE |
| MA4_23R | ChrX | 10180554  | G | A | 0.333333333 | CLCN4   | ENST00000380833_r73 | c.1437 G>A | p.A479A  | SILENT   |
| MA4_23R | ChrX | 12937513  | C | T | 0.253424658 | TLR8    | ENST00000218032_r73 | c.354 C>T  | p.D118D  | SILENT   |
| MA4_23R | ChrX | 16168467  | T | C | 0.647058824 | GRPR    | ENST00000380289_r73 | c.453 T>C  | p.S151S  | SILENT   |
| MA4_23R | ChrX | 16627756  | C | T | 0.346153846 | CTPS2   | ENST00000359276_r73 | c.1599 G>A | p.P533P  | SILENT   |
| MA4_23R | ChrX | 16859628  | G | A | 0.517241379 | TXLNG   | ENST00000380122_r73 | c.1326 G>A | p.Q442Q  | SILENT   |
| MA4_23R | ChrX | 21508666  | A | G | 0.193277311 | CNKSR2  | ENST00000279451_r73 | c.651 A>G  | p.Q217Q  | SILENT   |
| MA4_23R | ChrX | 21861434  | A | G | 0.28        | MBTPS2  | ENST00000379484_r73 | c.222 A>G  | p.Q74Q   | SILENT   |
| MA4_23R | ChrX | 23019346  | G | T | 0.339285714 | DDX53   | ENST00000327968_r73 | c.1172 G>T | p.R391M  | MISSENSE |
| MA4_23R | ChrX | 23933852  | G | A | 0.3125      | CXorf58 | ENST00000379211_r73 | c.252 G>A  | p.V84V   | SILENT   |
| MA4_23R | ChrX | 24608284  | A | G | 0.223880597 | PCYT1B  | ENST00000379145_r73 | c.288 T>C  | p.S96S   | SILENT   |
| MA4_23R | ChrX | 26157792  | C | T | 0.560606061 | MAGEB18 | ENST00000325250_r73 | c.690 C>T  | p.A230A  | SILENT   |
| MA4_23R | ChrX | 27999146  | C | T | 0.302013423 | DCAF8L1 | ENST00000441525_r73 | c.306 G>A  | p.E102E  | SILENT   |
| MA4_23R | ChrX | 30254361  | G | A | 0.375       | MAGEB3  | ENST00000378986_r73 | c.320 G>A  | p.R107H  | MISSENSE |
| MA4_23R | ChrX | 30254530  | A | G | 0.186440678 | MAGEB3  | ENST00000378986_r73 | c.489 A>G  | p.V163V  | SILENT   |
| MA4_23R | ChrX | 30326983  | C | T | 0.328767123 | NR0B1   | ENST00000378970_r73 | c.498 G>A  | p.R166R  | SILENT   |

Sheet1

|         |      |          |   |   |             |         |                     |        |     |          |          |
|---------|------|----------|---|---|-------------|---------|---------------------|--------|-----|----------|----------|
| MA4_23R | ChrX | 31496426 | T | C | 0.234848485 | DMD     | ENST00000378677_r73 | c.8722 | A>G | p.N2908D | MISSENSE |
| MA4_23R | ChrX | 31496431 | T | A | 0.2421875   | DMD     | ENST00000378677_r73 | c.8717 | A>T | p.E2906V | MISSENSE |
| MA4_23R | ChrX | 31697636 | A | G | 0.27972028  | DMD     | ENST00000378677_r73 | c.7716 | T>C | p.N2572N | SILENT   |
| MA4_23R | ChrX | 31893307 | T | G | 0.310344828 | DMD     | ENST00000378677_r73 | c.7084 | A>C | p.K2362Q | MISSENSE |
| MA4_23R | ChrX | 32235149 | G | A | 0.222222222 | DMD     | ENST00000378677_r73 | c.6310 | C>T | p.R2104C | MISSENSE |
| MA4_23R | ChrX | 32380996 | C | T | 0.330275229 | DMD     | ENST00000378677_r73 | c.5222 | G>A | p.R1741H | MISSENSE |
| MA4_23R | ChrX | 35988996 | T | C | 0.4         | CXorf22 | ENST00000297866_r73 | c.1926 | T>C | p.L642L  | SILENT   |
| MA4_23R | ChrX | 35993454 | C | T | 0.612903226 | CXorf22 | ENST00000297866_r73 | c.2445 | C>T | p.D815D  | SILENT   |
| MA4_23R | ChrX | 36007464 | A | T | 0.333333333 | CXorf22 | ENST00000297866_r73 | c.2742 | A>T | p.E914D  | MISSENSE |
| MA4_23R | ChrX | 36368166 | G | A | 0.304347826 | CXorf30 | ENST00000378657_r73 | c.955  | G>A | p.D319N  | MISSENSE |
| MA4_23R | ChrX | 36371719 | T | A | 0.479591837 | CXorf30 | ENST00000378657_r73 | c.1112 | T>A | p.F371Y  | MISSENSE |
| MA4_23R | ChrX | 36385156 | A | G | 0.216374269 | CXorf30 | ENST00000378657_r73 | c.1437 | A>G | p.E479E  | SILENT   |
| MA4_23R | ChrX | 37028127 | A | G | 0.322580645 | FAM47C  | ENST00000358047_r73 | c.1644 | A>G | p.P548P  | SILENT   |
| MA4_23R | ChrX | 37029254 | A | C | 0.323076923 | FAM47C  | ENST00000358047_r73 | c.2771 | A>C | p.N924T  | MISSENSE |
| MA4_23R | ChrX | 39932907 | T | C | 0.201438849 | BCOR    | ENST00000397354_r73 | c.1692 | A>G | p.A564A  | SILENT   |
| MA4_23R | ChrX | 40513785 | C | T | 0.183673469 | MED14   | ENST00000324817_r73 | c.4122 | G>A | p.S1374S | SILENT   |
| MA4_23R | ChrX | 40573157 | G | A | 0.296875    | MED14   | ENST00000324817_r73 | c.525  | C>T | p.D175D  | SILENT   |
| MA4_23R | ChrX | 43603391 | T | C | 0.606060606 | MAOA    | ENST00000338702_r73 | c.1410 | T>C | p.D470D  | SILENT   |
| MA4_23R | ChrX | 44401295 | T | G | 0.119047619 | FUNDC1  | ENST00000378045_r73 | c.81   | A>C | p.A27A   | SILENT   |
| MA4_23R | ChrX | 47343254 | C | T | 0.284482759 | CXorf24 | ENST00000357412_r73 | c.251  | C>T | p.T84I   | MISSENSE |
| MA4_23R | ChrX | 47444985 | T | C | 0.351851852 | TIMP1   | ENST00000218388_r73 | c.372  | T>C | p.F124F  | SILENT   |
| MA4_23R | ChrX | 47483800 | G | A | 0.327272727 | CFP     | ENST00000396992_r73 | c.1284 | C>T | p.N428N  | SILENT   |
| MA4_23R | ChrX | 47918205 | G | A | 0.666666667 | ZNF630  | ENST00000409324_r73 | c.1626 | C>T | p.P542P  | SILENT   |
| MA4_23R | ChrX | 48418126 | A | G | 0.271186441 | TBC1D25 | ENST00000376771_r73 | c.830  | A>G | p.N277S  | MISSENSE |
| MA4_23R | ChrX | 48418659 | G | A | 0.377192983 | TBC1D25 | ENST00000376771_r73 | c.1363 | G>A | p.A455T  | MISSENSE |
| MA4_23R | ChrX | 48751289 | G | A | 0.394736842 | TIMM17B | ENST00000376582_r73 | c.324  | C>T | p.G108G  | SILENT   |
| MA4_23R | ChrX | 48888074 | T | C | 0.538461539 | TFE3    | ENST00000315869_r73 | c.1323 | A>G | p.V441V  | SILENT   |
| MA4_23R | ChrX | 53457622 | T | C | 0.176470588 | RIBC1   | ENST00000375327_r73 | c.942  | T>C | p.T314T  | SILENT   |
| MA4_23R | ChrX | 54836361 | A | G | 0.2         | MAGED2  | ENST00000375068_r73 | c.252  | A>G | p.S84S   | SILENT   |
| MA4_23R | ChrX | 54836505 | A | G | 0.188235294 | MAGED2  | ENST00000375068_r73 | c.396  | A>G | p.T132T  | SILENT   |
| MA4_23R | ChrX | 54838077 | C | T | 0.23255814  | MAGED2  | ENST00000375068_r73 | c.981  | C>T | p.S327S  | SILENT   |
| MA4_23R | ChrX | 67937976 | G | A | 0.295081967 | STARD8  | ENST00000374599_r73 | c.1220 | G>A | p.R407Q  | MISSENSE |
| MA4_23R | ChrX | 68381912 | G | A | 0.493670886 | PJA1    | ENST00000374583_r73 | c.1170 | C>T | p.G390G  | SILENT   |
| MA4_23R | ChrX | 70597546 | C | G | 0.204081633 | TAF1    | ENST00000373790_r73 | c.805  | C>G | p.L269V  | MISSENSE |
| MA4_23R | ChrX | 70787856 | T | C | 0.268965517 | OGT     | ENST00000373719_r73 | c.2856 | T>C | p.A952A  | SILENT   |
| MA4_23R | ChrX | 71350133 | T | G | 0.279411765 | RGAG4   | ENST00000479991_r73 | c.1258 | A>C | p.S420R  | MISSENSE |
| MA4_23R | ChrX | 71360204 | A | G | 0.242424242 | NHSL2   | ENST00000373677_r73 | c.1708 | A>G | p.R570G  | MISSENSE |

Sheet1

|         |      |           |   |   |             |          |                     |            |          |          |
|---------|------|-----------|---|---|-------------|----------|---------------------|------------|----------|----------|
| MA4_23R | ChrX | 73524557  | A | G | 0.333333333 | ZCCHC13  | ENST00000339534_r73 | c.456 A>G  | p.L152L  | SILENT   |
| MA4_23R | ChrX | 77913569  | G | A | 0.292134832 | ZCCHC5   | ENST00000321110_r73 | c.349 C>T  | p.P117S  | MISSENSE |
| MA4_23R | ChrX | 78216024  | A | C | 0.22        | P2RY10   | ENST00000171757_r73 | c.7 A>C    | p.N3H    | MISSENSE |
| MA4_23R | ChrX | 79281202  | G | A | 0.368421053 | TBX22    | ENST00000373296_r73 | c.559 G>A  | p.E187K  | MISSENSE |
| MA4_23R | ChrX | 83723541  | A | G | 0.283018868 | HDX      | ENST00000297977_r73 | c.1190 T>C | p.F397S  | MISSENSE |
| MA4_23R | ChrX | 85219021  | T | C | 0.174757282 | CHM      | ENST00000357749_r73 | c.351 A>G  | p.A117A  | SILENT   |
| MA4_23R | ChrX | 86887244  | C | T | 0.25        | KLHL4    | ENST00000373119_r73 | c.1359 C>T | p.T453T  | SILENT   |
| MA4_23R | ChrX | 88008807  | G | A | 0.285714286 | CPXCR1   | ENST00000276127_r73 | c.392 G>A  | p.R131H  | MISSENSE |
| MA4_23R | ChrX | 89177673  | G | A | 0.279069767 | TGIF2LX  | ENST00000283891_r73 | c.589 G>A  | p.V197I  | MISSENSE |
| MA4_23R | ChrX | 99890204  | C | T | 0.295454546 | TSPAN6   | ENST00000373020_r73 | c.322 G>A  | p.A108T  | MISSENSE |
| MA4_23R | ChrX | 100749588 | A | C | 0.325       | ARMCX4   | ENST00000423738_r73 | c.6012 A>C | p.Q2004H | MISSENSE |
| MA4_23R | ChrX | 100808222 | C | T | 0.214876033 | ARMCX1   | ENST00000372829_r73 | c.309 C>T  | p.G103G  | SILENT   |
| MA4_23R | ChrX | 103042882 | T | C | 0.263157895 | PLP1     | ENST00000303958_r73 | c.609 T>C  | p.D203D  | SILENT   |
| MA4_23R | ChrX | 103294760 | C | T | 0.462686567 | H2BFM    | ENST00000355016_r73 | c.217 C>T  | p.Q73*   | NONSENSE |
| MA4_23R | ChrX | 104992963 | T | C | 0.26984127  | IL1RAPL2 | ENST00000372582_r73 | c.1059 T>C | p.Y353Y  | SILENT   |
| MA4_23R | ChrX | 105152282 | G | A | 0.333333333 | NRK      | ENST00000243300_r73 | c.1072 G>A | p.V358M  | MISSENSE |
| MA4_23R | ChrX | 105449445 | T | A | 0.284210526 | MUM1L1   | ENST00000357175_r73 | c.20 T>A   | p.L7Q    | MISSENSE |
| MA4_23R | ChrX | 105449709 | G | A | 0.324786325 | MUM1L1   | ENST00000357175_r73 | c.284 G>A  | p.G95D   | MISSENSE |
| MA4_23R | ChrX | 111698613 | T | C | 0.279411765 | ZCCHC16  | ENST00000340433_r73 | c.657 T>C  | p.H219H  | SILENT   |
| MA4_23R | ChrX | 111914244 | A | G | 0.272727273 | LHFPL1   | ENST00000371968_r73 | c.375 T>C  | p.F125F  | SILENT   |
| MA4_23R | ChrX | 114398338 | T | G | 0.213333333 | LRCH2    | ENST00000317135_r73 | c.1364 A>C | p.K455T  | MISSENSE |
| MA4_23R | ChrX | 114541176 | G | A | 0.5         | LUZP4    | ENST00000371920_r73 | c.749 G>A  | p.R250K  | MISSENSE |
| MA4_23R | ChrX | 117528142 | C | T | 0.26056338  | WDR44    | ENST00000254029_r73 | c.951 C>T  | p.T317T  | SILENT   |
| MA4_23R | ChrX | 118108785 | T | C | 0.225806452 | LONRF3   | ENST00000365713_r73 | c.42 T>C   | p.A14A   | SILENT   |
| MA4_23R | ChrX | 118587003 | C | T | 0.206666667 | SLC25A43 | ENST00000217909_r73 | c.1001 C>T | p.P334L  | MISSENSE |
| MA4_23R | ChrX | 118604436 | T | C | 0.565217391 | SLC25A5  | ENST00000317881_r73 | c.699 T>C  | p.T233T  | SILENT   |
| MA4_23R | ChrX | 118678364 | G | A | 0.454545455 | CXorf56  | ENST00000486230_r73 | c.375 C>T  | p.G125G  | SILENT   |
| MA4_23R | ChrX | 122537277 | T | C | 0.571428571 | GRIA3    | ENST00000371251_r73 | c.1200 T>C | p.N400N  | SILENT   |
| MA4_23R | ChrX | 123034511 | A | C | 0.5         | XIAP     | ENST00000371199_r73 | c.1268 A>C | p.Q423P  | MISSENSE |
| MA4_23R | ChrX | 123540315 | G | T | 0.75        | TENM1    | ENST00000371130_r73 | c.4986 C>A | p.T1662T | SILENT   |
| MA4_23R | ChrX | 125954964 | C | G | 0.172413793 | CXorf64  | ENST00000371125_r73 | c.343 C>G  | p.L115V  | MISSENSE |
| MA4_23R | ChrX | 128880614 | T | C | 0.529411765 | XPNPEP2  | ENST00000371106_r73 | c.447 T>C  | p.P149P  | SILENT   |
| MA4_23R | ChrX | 129201179 | C | T | 0.152542373 | ELF4     | ENST00000335997_r73 | c.1509 G>A | p.T503T  | SILENT   |
| MA4_23R | ChrX | 129283520 | A | G | 0.222222222 | AIFM1    | ENST00000416073_r73 | c.273 T>C  | p.D91D   | SILENT   |
| MA4_23R | ChrX | 129349295 | T | G | 0.265306122 | ZNF280C  | ENST00000370978_r73 | c.1851 A>C | p.G617G  | SILENT   |
| MA4_23R | ChrX | 129518646 | A | G | 0.244897959 | GPR119   | ENST00000276218_r73 | c.776 T>C  | p.V259A  | MISSENSE |
| MA4_23R | ChrX | 130408745 | G | A | 0.273972603 | IGSF1    | ENST00000370910_r73 | c.3552 C>T | p.V1184V | SILENT   |

Sheet1

|         |      |           |   |   |             |          |                     |        |     |          |          |
|---------|------|-----------|---|---|-------------|----------|---------------------|--------|-----|----------|----------|
| MA4_23R | ChrX | 130409217 | C | G | 0.333333333 | IGSF1    | ENST00000370910_r73 | c.3201 | G>C | p.M1067I | MISSENSE |
| MA4_23R | ChrX | 131212512 | A | G | 0.288288288 | FRMD7    | ENST00000298542_r73 | c.1533 | T>C | p.I511I  | SILENT   |
| MA4_23R | ChrX | 131212944 | A | G | 0.236111111 | FRMD7    | ENST00000298542_r73 | c.1101 | T>C | p.N367N  | SILENT   |
| MA4_23R | ChrX | 132161159 | G | A | 0.212389381 | USP26    | ENST00000370832_r73 | c.1090 | C>T | p.L364F  | MISSENSE |
| MA4_23R | ChrX | 132161673 | C | T | 0.253164557 | USP26    | ENST00000370832_r73 | c.576  | G>A | p.E192E  | SILENT   |
| MA4_23R | ChrX | 133963268 | C | T | 0.251968504 | FAM122C  | ENST00000370785_r73 | c.202  | C>T | p.P68S   | MISSENSE |
| MA4_23R | ChrX | 134185997 | T | A | 0.405405405 | FAM127B  | ENST00000370775_r73 | c.142  | A>T | p.S48C   | MISSENSE |
| MA4_23R | ChrX | 134990000 | C | T | 0.283333333 | SAGE1    | ENST00000370709_r73 | c.1159 | C>T | p.H387Y  | MISSENSE |
| MA4_23R | ChrX | 134991078 | A | G | 0.20625     | SAGE1    | ENST00000370709_r73 | c.1497 | A>G | p.Q499Q  | SILENT   |
| MA4_23R | ChrX | 134994005 | T | C | 0.35483871  | SAGE1    | ENST00000370709_r73 | c.2414 | T>C | p.L805S  | MISSENSE |
| MA4_23R | ChrX | 135426693 | A | G | 0.189655172 | GPR112   | ENST00000394143_r73 | c.828  | A>G | p.I276M  | MISSENSE |
| MA4_23R | ChrX | 135431236 | T | C | 0.297435897 | GPR112   | ENST00000394143_r73 | c.5371 | T>C | p.F1791L | MISSENSE |
| MA4_23R | ChrX | 135431358 | C | T | 0.277777778 | GPR112   | ENST00000394143_r73 | c.5493 | C>T | p.P1831P | SILENT   |
| MA4_23R | ChrX | 135480126 | T | C | 0.37037037  | GPR112   | ENST00000394143_r73 | c.8271 | T>C | p.F2757F | SILENT   |
| MA4_23R | ChrX | 135496398 | G | A | 0.26519337  | GPR112   | ENST00000394143_r73 | c.9117 | G>A | p.T3039T | SILENT   |
| MA4_23R | ChrX | 138679712 | T | A | 0.17948718  | MCF2     | ENST00000520602_r73 | c.2142 | A>T | p.G714G  | SILENT   |
| MA4_23R | ChrX | 142795225 | G | A | 0.230769231 | SPANXN2  | ENST00000370498_r73 | c.453  | C>T | p.D151D  | SILENT   |
| MA4_23R | ChrX | 149013097 | G | A | 0.173913044 | MAGEA8   | ENST00000286482_r73 | c.51   | G>A | p.Q17Q   | SILENT   |
| MA4_23R | ChrX | 149680554 | C | T | 0.289156627 | MAMLD1   | ENST00000432680_r73 | c.2208 | C>T | p.S736S  | SILENT   |
| MA4_23R | ChrX | 150348610 | C | T | 0.220183486 | GPR50    | ENST00000218316_r73 | c.555  | C>T | p.N185N  | SILENT   |
| MA4_23R | ChrX | 150817094 | C | G | 0.242105263 | PASD1    | ENST00000370357_r73 | c.637  | C>G | p.Q213E  | MISSENSE |
| MA4_23R | ChrX | 150840916 | C | T | 0.510638298 | PASD1    | ENST00000370357_r73 | c.1699 | C>T | p.L567L  | SILENT   |
| MA4_23R | ChrX | 150911107 | G | A | 0.375       | CNGA2    | ENST00000329903_r73 | c.582  | G>A | p.L194L  | SILENT   |
| MA4_23R | ChrX | 151092220 | A | G | 0.242424242 | MAGEA4   | ENST00000370340_r73 | c.84   | A>G | p.A28A   | SILENT   |
| MA4_23R | ChrX | 151899913 | T | C | 0.227722772 | MAGEA12  | ENST00000357916_r73 | c.888  | A>G | p.G296G  | SILENT   |
| MA4_23R | ChrX | 152106638 | C | T | 0.230769231 | ZNF185   | ENST00000370268_r73 | c.1139 | C>T | p.S380F  | MISSENSE |
| MA4_23R | ChrX | 152751497 | G | A | 0.3         | U82695.9 | ENST00000428676_r73 | c.140  | G>A | p.R47H   | MISSENSE |
| MA4_23R | ChrX | 153039502 | G | C | 0.304347826 | PLXNB3   | ENST00000361971_r73 | c.3468 | G>C | p.E1156D | MISSENSE |
| MA4_23R | ChrX | 153041544 | T | C | 0.186046512 | PLXNB3   | ENST00000361971_r73 | c.4604 | T>C | p.M1535T | MISSENSE |
| MA4_23R | ChrX | 153046686 | C | T | 0.1875      | SRPK3    | ENST00000370104_r73 | c.75   | C>T | p.C25C   | SILENT   |
| MA4_23R | ChrX | 153070999 | G | A | 0.28125     | PDZD4    | ENST00000164640_r73 | c.612  | C>T | p.N204N  | SILENT   |
| MA4_23R | ChrX | 153132228 | G | A | 0.276923077 | L1CAM    | ENST00000370060_r73 | c.2307 | C>T | p.S769S  | SILENT   |
| MA4_23R | ChrX | 153172059 | C | T | 0.212962963 | AVPR2    | ENST00000358927_r73 | c.993  | C>T | p.S331S  | SILENT   |
| MA4_23R | ChrX | 153421912 | T | C | 0.216216216 | OPN1LW   | ENST00000369951_r73 | c.888  | T>C | p.G296G  | SILENT   |
| MA4_23R | ChrX | 153540977 | A | G | 0.25        | TKTL1    | ENST00000369915_r73 | c.717  | A>G | p.E239E  | SILENT   |
| MA4_23R | ChrX | 153581932 | A | G | 0.36        | FLNA     | ENST00000360319_r73 | c.5826 | T>C | p.A1942A | SILENT   |
| MA4_23R | ChrX | 153667176 | T | C | 0.271186441 | GDI1     | ENST00000447750_r73 | c.219  | T>C | p.N73N   | SILENT   |

Sheet1

|         |       |           |           |        |             |          |                     |                       |               |                  |
|---------|-------|-----------|-----------|--------|-------------|----------|---------------------|-----------------------|---------------|------------------|
| MA4_23R | ChrX  | 153760953 | C         | T      | 0.298850575 | G6PD     | ENST00000393562_r73 | c.1206 G>A            | p.Q402Q       | SILENT           |
| MA4_23R | ChrX  | 153880569 | A         | G      | 0.363636364 | CTAG2    | ENST00000247306_r73 | c.606 T>C             | p.N202N       | SILENT           |
| MA4_23R | ChrX  | 153880634 | C         | G      | 0.391304348 | CTAG2    | ENST00000247306_r73 | c.541 G>C             | p.G181R       | MISSENSE         |
| MA4_23R | ChrX  | 153880830 | A         | C      | 0.297709924 | CTAG2    | ENST00000247306_r73 | c.345 T>G             | p.P115P       | SILENT           |
| MA4_23R | ChrX  | 153881525 | G         | C      | 0.267441861 | CTAG2    | ENST00000247306_r73 | c.265 C>G             | p.Q89E        | MISSENSE         |
| MA4_23R | Chr11 | 209895    | CCC       | -      | 0.107142857 | RIC8A    | ENST00000325207_r73 | c.621 CCC>-           | p.N207 NP>N   | MISSENSE         |
| MA4_23R | Chr11 | 17352478  | ACA       | -      | 0.166666667 | NUCB2    | ENST00000529010_r73 | c.1203 ACA>-          | p.L401 LQ>L   | MISSENSE         |
| MA4_23R | Chr11 | 4592707   | -         | AC     | 0.151162791 | C11orf40 | ENST00000307616_r73 | c.600 ->GT            | p.C200fs*12   | FRAMESHIFT       |
| MA4_23R | Chr11 | 5172796   | -         | C      | 0.192592593 | OR52A1   | ENST00000380367_r73 | c.804 ->G             | p.G268fs*14   | FRAMESHIFT       |
| MA4_23R | Chr11 | 71850157  | -         | TA     | 0.112033195 | FOLR3    | ENST00000542161_r73 | c.313 ->TA            | p.*105fs*73   | FRAMESHIFT       |
| MA4_23R | Chr11 | 73020376  | -         | CTC    | 0.125       | ARHGEF17 | ENST00000263674_r73 | c.693 ->CTC           | p.C231 C>CS   | MISSENSE         |
| MA4_23R | Chr11 | 94153333  | -         | ATC    | 0.142857143 | MRE11A   | ENST00000323929_r73 | c.2085 ->GAT          | p.D695 D>EI   | MISSENSE         |
| MA4_23R | Chr7  | 137612914 | TGG       | -      | 0.4375      | CREB3L2  | ENST00000330387_r73 | c.299 CCA>-           | p.T100 TS>S   | MISSENSE         |
| MA4_23R | Chr7  | 12391269  | -         | A      | 0.2         | VWDE     | ENST00000275358_r73 | c.3816 ->T            | p.N1272fs*2   | FRAMESHIFT       |
| MA4_23R | Chr17 | 38858135  | A         | -      | 0.180851064 | KRT24    | ENST00000264651_r73 | c.666 T>-             | p.N222fs*11   | FRAMESHIFT       |
| MA4_23R | Chr17 | 72957963  | T         | -      | 0.3125      | HID1     | ENST00000425042_r73 | Exon 6 + 5 A>-        | -             | ESSENTIAL_SPLICE |
| MA4_23R | Chr17 | 79219501  | ATG       | -      | 0.260273973 | SLC38A10 | ENST00000374759_r73 | c.3213 CAT>-          | p.I1071 I >I  | MISSENSE         |
| MA4_23R | Chr2  | 3749152   | GAA       | -      | 0.176470588 | ALLC     | ENST00000252505_r73 | c.901 GAA>-           | p.E301Del(E)  | MISSENSE         |
| MA4_23R | Chr2  | 112843593 | TTGATAT   | -      | 0.222222222 | TMEM87B  | ENST00000283206_r73 | c.850 TTGATAT>-       | p.L284fs*4    | FRAMESHIFT       |
| MA4_23R | Chr2  | 238244864 | GCA       | -      | 0.171052632 | COL6A3   | ENST00000295550_r73 | c.8877 TGC>-          | p.A2959 AA>A  | MISSENSE         |
| MA4_23R | Chr2  | 71801335  | -         | AGGCGG | 0.109090909 | DYSF     | ENST00000409762_r73 | c.3233 ->AGGCGG       | p.Q1078 Q>QAE | MISSENSE         |
| MA4_23R | Chr2  | 170387133 | -         | T      | 0.181818182 | FASTKD1  | ENST00000453153_r73 | c.2406 ->A            | p.K802fs*18   | FRAMESHIFT       |
| MA4_23R | Chr2  | 172967129 | -         | GCT    | 0.122222222 | DLX2     | ENST00000234198_r73 | c.138 ->AGC           | p.S46 S>RA    | MISSENSE         |
| MA4_23R | Chr2  | 234113397 | -         | TG     | 0.181818182 | INPP5D   | ENST00000491070_r73 | c.110 ->TG            | p.I37fs*90    | FRAMESHIFT       |
| MA4_23R | Chr2  | 234429740 | -         | TTC    | 0.271186441 | USP40    | ENST00000450966_r73 | c.2255 ->GAA          | p.K752 K>RK   | MISSENSE         |
| MA4_23R | Chr22 | 38119755  | CAA       | -      | 0.157894737 | TRIOBP   | ENST00000406386_r73 | c.1192 CAA>-          | p.Q398Del(Q)  | MISSENSE         |
| MA4_23R | Chr22 | 36587846  | -         | CT     | 0.120171674 | APOL4    | ENST00000404685_r73 | c.331 ->AG            | p.V111fs*242  | FRAMESHIFT       |
| MA4_23R | Chr1  | 9304979   | CCCAGGCA  | -      | 0.178571429 | H6PD     | ENST00000377403_r73 | Exon 2 - 5 CCCAGGCA>- | -             | ESSENTIAL_SPLICE |
| MA4_23R | Chr1  | 36643701  | AGA       | -      | 0.333333333 | MAP7D1   | ENST00000373151_r73 | c.1607 AGA>-          | p.E536 EK>E   | MISSENSE         |
| MA4_23R | Chr1  | 45974801  | CCCGCC    | -      | 0.158273381 | MMACHC   | ENST00000401061_r73 | c.763 CCCGCC>-        | p.P255Del(PA) | MISSENSE         |
| MA4_23R | Chr1  | 153907279 | CTGCTGCTG | -      | 0.102040816 | DENND4B  | ENST00000361217_r73 | c.2722 CAGCAGCAG>-    | p.Q908Del(QQ) | MISSENSE         |
| MA4_23R | Chr1  | 154542837 | ACA       | -      | 0.145833333 | CHRN2    | ENST00000368476_r73 | c.359 ACA>-           | p.Y120 YN>Y   | MISSENSE         |
| MA4_23R | Chr1  | 156354348 | C         | -      | 0.184210526 | RHBG     | ENST00000368249_r73 | c.1265 C>-            | p.S422fs*38   | FRAMESHIFT       |
| MA4_23R | Chr1  | 206239432 | AAT       | -      | 0.183823529 | C1orf186 | ENST00000331555_r73 | c.464 ATT>-           | p.Y155 YF>F   | MISSENSE         |
| MA4_23R | Chr1  | 23966895  | -         | AAG    | 0.275362319 | MDS2     | ENST00000374555_r73 | c.279 ->AAG           | p.V93 V>VR    | MISSENSE         |
| MA4_23R | Chr1  | 85598680  | -         | A      | 0.110236221 | WDR63    | ENST00000294664_r73 | c.2675 ->A            | p.*892fs*1    | FRAMESHIFT       |
| MA4_23R | Chr1  | 153907279 | -         | CTG    | 0.102040816 | DENND4B  | ENST00000361217_r73 | c.2730 ->CAG          | p.Q910 Q>HR   | MISSENSE         |

Sheet1

|         |       |           |           |        |             |               |                     |                    |                |                  |
|---------|-------|-----------|-----------|--------|-------------|---------------|---------------------|--------------------|----------------|------------------|
| MA4_23R | Chr1  | 234744946 | -         | GCT    | 0.205882353 | IRF2BP2       | ENST00000366610_r73 | c.295 ->AGC        | p.L99Ins(S)    | MISSENSE         |
| MA4_23R | Chr1  | 248059780 | -         | A      | 0.136363636 | OR2W3         | ENST00000360358_r73 | c.892 ->A          | p.K298fs*19    | FRAMESHIFT       |
| MA4_23R | Chr18 | 60646248  | CAG       | -      | 0.129533679 | PHLPP1        | ENST00000262719_r73 | c.4738 CAG>-       | p.Q1580Del(Q)  | MISSENSE         |
| MA4_23R | Chr16 | 3406757   | T         | -      | 0.175257732 | OR2C1         | ENST00000304936_r73 | c.817 T>-          | p.F273fs*13    | FRAMESHIFT       |
| MA4_23R | Chr16 | 7760847   | AAA       | -      | 0.238095238 | RBFOX1        | ENST00000550418_r73 | Exon 16 + 5 AAA>-  | -              | ESSENTIAL_SPLICE |
| MA4_23R | Chr16 | 67859708  | AGG       | -      | 0.125       | TSNAXIP1      | ENST00000388833_r73 | c.791 AGG>-        | p.Q264 QE>Q    | MISSENSE         |
| MA4_23R | Chr16 | 336889    | -         | A      | 0.190476191 | PDIA2         | ENST00000219406_r73 | c.1477 ->A         | p.N493fs*64    | FRAMESHIFT       |
| MA4_23R | Chr13 | 61102576  | ATA       | -      | 0.133640553 | TDRD3         | ENST00000377894_r73 | c.938 ATA>-        | p.D313 DN>D    | MISSENSE         |
| MA4_23R | Chr13 | 77532065  | CAGAGGTAG | -      | 0.207317073 | IRG1          | ENST00000377462_r73 | c.1391 CAGAGGTAG>- | p.P464 PEVA>P  | MISSENSE         |
| MA4_23R | Chr6  | 168314998 | G         | -      | 0.108108108 | MLLT4         | ENST00000392108_r73 | Exon 16 + 5 G>-    | -              | ESSENTIAL_SPLICE |
| MA4_23R | ChrX  | 135474445 | GAT       | -      | 0.266666667 | GPR112        | ENST00000394143_r73 | c.7966 GAT>-       | p.D2656Del(D)  | MISSENSE         |
| MA4_23R | ChrX  | 36162685  | -         | TG     | 0.30952381  | GHDC2         | ENST00000378660_r73 | c.1268 ->TG        | p.L423fs*2     | FRAMESHIFT       |
| MA4_23R | ChrX  | 112022298 | -         | AGG    | 0.177777778 | AMOT          | ENST00000304758_r73 | c.1857 ->CCT       | p.P619 P>PL    | MISSENSE         |
| MA4_23R | Chr3  | 124482495 | TTGTTGAAC | -      | 0.144578313 | ITGB5         | ENST00000296181_r73 | c.2367 GTTCAACAA>- | p.K789 KFNK>K  | MISSENSE         |
| MA4_23R | Chr3  | 56650055  | -         | CTC    | 0.188679245 | CCDC66        | ENST00000394672_r73 | c.1817 ->CTC       | p.S606 S>SP    | MISSENSE         |
| MA4_23R | Chr3  | 122459291 | -         | AGA    | 0.111111111 | HSPBAP1       | ENST00000306103_r73 | c.1368 ->TCT       | p.P456 P>PL    | MISSENSE         |
| MA4_23R | Chr9  | 139235482 | C         | -      | 0.159090909 | GPSM1         | ENST00000392945_r73 | c.1239 C>-         | p.L413fs*57    | FRAMESHIFT       |
| MA4_23R | Chr9  | 80881428  | -         | GGG    | 0.153333333 | CEP78         | ENST00000415759_r73 | c.1871 ->GGG       | p.P624 P>RA    | MISSENSE         |
| MA4_23R | Chr9  | 125391771 | -         | A      | 0.255813954 | OR1B1         | ENST00000304833_r73 | c.44 ->T           | p.L15fs*9      | FRAMESHIFT       |
| MA4_23R | Chr12 | 27849503  | A         | -      | 0.2         | REP15         | ENST00000310791_r73 | c.8 A>-            | p.Q3fs*9       | FRAMESHIFT       |
| MA4_23R | Chr12 | 72070506  | GTT       | -      | 0.101449275 | THAP2         | ENST00000308086_r73 | c.305 GTT>-        | p.S102 SC>S    | MISSENSE         |
| MA4_23R | Chr12 | 2062324   | -         | TGC    | 0.104477612 | DCP1B         | ENST00000280665_r73 | c.782 ->GCA        | p.Q261 Q>RK    | MISSENSE         |
| MA4_23R | Chr20 | 25457050  | CTCCCA    | -      | 0.161764706 | NINL          | ENST00000278886_r73 | c.2872 TGGGAG>-    | p.W958Del(WE)  | MISSENSE         |
| MA4_23R | Chr14 | 94410276  | A         | -      | 0.32        | RP11-131H24.4 | ENST00000557646_r73 | c.167 A>-          | p.Q56fs*8      | FRAMESHIFT       |
| MA4_23R | Chr14 | 105352885 | GCAGGA    | -      | 0.215686275 | CEP170B       | ENST00000556508_r73 | c.2099 GCAGGA>-    | p.R700 RRS>R   | MISSENSE         |
| MA4_23R | Chr14 | 23548788  | -         | GTGAAT | 0.123076923 | ACIN1         | ENST00000262710_r73 | c.1930 ->ATTCAC    | p.R644Ins(IH)  | MISSENSE         |
| MA4_23R | Chr15 | 43579798  | C         | -      | 0.121827411 | TGM7          | ENST00000452443_r73 | c.628 G>-          | p.A210fs*17    | FRAMESHIFT       |
| MA4_23R | Chr15 | 41099900  | -         | GGGGC  | 0.153846154 | ZFYVE19       | ENST00000355341_r73 | c.113 ->GGGGC      | p.W38fs*73     | FRAMESHIFT       |
| MA4_23R | Chr8  | 75664695  | A         | -      | 0.143646409 | RP11-758M4.1  | ENST00000523442_r73 | c.248 A>-          | p.H83fs*24     | FRAMESHIFT       |
| MA4_23R | Chr8  | 145740367 | A         | -      | 0.111111111 | RECQL4        | ENST00000428558_r73 | c.1573 T>-         | p.C525fs*33    | FRAMESHIFT       |
| MA4_23R | Chr8  | 72755648  | -         | T      | 0.166666667 | RP11-383H13.1 | ENST00000537896_r73 | c.12 ->T           | p.T4fs*16      | FRAMESHIFT       |
| MA4_23R | Chr4  | 177106010 | TCTC      | -      | 0.158227848 | SPATA4        | ENST00000280191_r73 | c.836 GAGA>-       | p.R279fs*4     | FRAMESHIFT       |
| MA4_23R | Chr19 | 8389893   | TCC       | -      | 0.13592233  | KANK3         | ENST00000330915_r73 | c.2022 GGA>-       | p.E674 ED>D    | MISSENSE         |
| MA4_23R | Chr19 | 11558341  | GAG       | -      | 0.1875      | PRKCSH        | ENST00000591462_r73 | c.937 GAG>-        | p.E313Del(E)   | MISSENSE         |
| MA4_23R | Chr19 | 23927742  | CA        | -      | 0.119047619 | ZNF681        | ENST00000402377_r73 | c.609 TG>-         | p.C203fs*5     | FRAMESHIFT       |
| MA4_23R | Chr19 | 37879853  | TGTGCA    | -      | 0.125748503 | ZNF527        | ENST00000436120_r73 | c.902 TGTGCA>-     | p.P301 PYA>PYA | MISSENSE         |
| MA4_23R | Chr19 | 54973989  | CCT       | -      | 0.172413793 | LENG9         | ENST00000333834_r73 | c.785 AGG>-        | p.E262 EA>A    | MISSENSE         |

Sheet1

|         |       |           |      |           |             |               |                     |                 |               |            |
|---------|-------|-----------|------|-----------|-------------|---------------|---------------------|-----------------|---------------|------------|
| MA4_23R | Chr19 | 34263201  | -    | AGC       | 0.13        | CHST8         | ENST00000438847_r73 | c.508 ->AGC     | p.S170Ins(S)  | MISSENSE   |
| MA4_23R | Chr19 | 46265048  | -    | TCCAGC    | 0.128205128 | AC074212.3    | ENST00000457052_r73 | c.1357 ->TCCAGC | p.S453Ins(SS) | MISSENSE   |
| MA4_23R | Chr19 | 55790887  | -    | GCCGCCGCC | 0.112359551 | HSPBP1        | ENST00000255631_r73 | c.90 ->GGCGCGCC | p.G30 G->GAAA | MISSENSE   |
| MA4_23R | Chr19 | 56244722  | -    | T         | 0.143884892 | NLRP9         | ENST00000332836_r73 | c.475 ->A       | p.T159fs*31   | FRAMESHIFT |
| MA4_23R | Chr10 | 21435341  | CACT | -         | 0.133640553 | C10orf113     | ENST00000534331_r73 | c.94 AGTG>-     | p.S32fs*5     | FRAMESHIFT |
| MA4_23R | Chr10 | 22498485  | -    | AGA       | 0.251231527 | EBLN1         | ENST00000422359_r73 | c.428 ->TCT     | p.L143 L>LL   | MISSENSE   |
| MA4_23R | Chr10 | 27702257  | -    | C         | 0.121052632 | PTCHD3        | ENST00000438700_r73 | c.923 ->G       | p.G308fs*27   | FRAMESHIFT |
| MA4_23R | Chr10 | 32740799  | -    | T         | 0.183486239 | CCDC7         | ENST00000277657_r73 | c.229 ->T       | p.L77fs*6     | FRAMESHIFT |
| MA4_23R | Chr5  | 7867478   | ATA  | -         | 0.147368421 | FASTKD3       | ENST00000264669_r73 | c.717 TAT>-     | p.I239 I>I    | MISSENSE   |
| MA4_23R | Chr5  | 74491716  | TCA  | -         | 0.14        | ANKRD31       | ENST00000506364_r73 | c.755 TGA>-     | p.M252 MN>N   | MISSENSE   |
| MA4_23R | Chr5  | 111755670 | G    | -         | 0.132653061 | FLJ11235      | ENST00000600409_r73 | c.376 G>-       | p.G126fs*173  | FRAMESHIFT |
| MA4_23R | Chr5  | 180687429 | TCT  | -         | 0.233502538 | TRIM52        | ENST00000327767_r73 | c.384 AGA>-     | p.E128 EE>E   | MISSENSE   |
| MA4_24  | Chr2  | 130832835 | C    | T         | 0.107142857 | POTEF         | ENST00000409914_r73 | c.2210 G>A      | p.R737H       | MISSENSE   |
| MA4_24  | Chr1  | 203134484 | G    | T         | 0.076923077 | ADORA1        | ENST00000309502_r73 | c.437 G>T       | p.W146L       | MISSENSE   |
| MA4_24  | Chr9  | 138377427 | C    | T         | 0.04787234  | PPP1R26       | ENST00000605286_r73 | c.1071 C>T      | p.S357S       | SILENT     |
| MA4_24  | Chr1  | 115258748 | C    | T         | 0.033224146 | NRAS          | ENST00000369535_r73 | c.34 G>A        | p.G12S        | MISSENSE   |
| MA4_24  | ChrX  | 100400133 | G    | C         | 0.022727273 | CENPI         | ENST00000372927_r73 | c.1646 G>C      | p.R549P       | MISSENSE   |
| MA4_24R | Chr21 | 22849652  | G    | A         | 0.30781759  | NCAM2         | ENST00000400546_r73 | c.1937 G>A      | p.G646E       | MISSENSE   |
| MA4_24R | Chr1  | 186014936 | G    | A         | 0.251021166 | HMCN1         | ENST00000271588_r73 | c.6421 G>A      | p.G2141S      | MISSENSE   |
| MA4_24R | Chr6  | 152420061 | A    | G         | 0.386363636 | ESR1          | ENST00000338799_r73 | c.1748 A>G      | p.Y583C       | MISSENSE   |
| MA4_24R | ChrX  | 100400133 | G    | C         | 0.52644041  | CENPI         | ENST00000372927_r73 | c.1646 G>C      | p.R549P       | MISSENSE   |
| MA4_24R | Chr14 | 64954616  | T    | A         | 0.31037692  | ZBTB25        | ENST00000261683_r73 | c.333 A>T       | p.A111A       | SILENT     |
| MA4_24R | Chr8  | 37702629  | C    | G         | 0.3010279   | BRF2          | ENST00000220659_r73 | c.639 G>C       | p.E213D       | MISSENSE   |
| MA4_24R | Chr9  | 126783462 | C    | T         | 0.231441048 | LHX2          | ENST00000373615_r73 | c.812 C>T       | p.T271M       | MISSENSE   |
| MA4_24R | Chr8  | 26240718  | G    | A         | 0.299591837 | BNIP3L        | ENST00000380629_r73 | c.72 G>A        | p.Q24Q        | SILENT     |
| MA4_24R | Chr12 | 53298699  | G    | A         | 0.277777778 | KRT8          | ENST00000552551_r73 | c.67 C>T        | p.R23C        | MISSENSE   |
| MA4_24R | ChrX  | 100745623 | G    | -         | 0.125       | ARMCX4        | ENST00000423738_r73 | c.2047 G>-      | p.D683fs*262  | FRAMESHIFT |
| MA4_25  | Chr22 | 31495066  | C    | T         | 0.181305399 | SMTN          | ENST00000358743_r73 | c.2352 C>T      | p.R784R       | SILENT     |
| MA4_25  | Chr12 | 25398284  | C    | T         | 0.182159147 | KRAS          | ENST00000311936_r73 | c.35 G>A        | p.G12D        | MISSENSE   |
| MA4_25  | Chr4  | 100574475 | G    | A         | 0.363435173 | RP11-766F14.2 | ENST00000511828_r73 | c.1331 C>T      | p.T444M       | MISSENSE   |
| MA4_25  | Chr5  | 176517475 | G    | A         | 0.785784993 | FGFR4         | ENST00000292408_r73 | c.176 G>A       | p.R59Q        | MISSENSE   |
| MA4_25  | Chr1  | 115258747 | C    | T         | 0.011875955 | NRAS          | ENST00000369535_r73 | c.35 G>A        | p.G12D        | MISSENSE   |
| MA4_25  | Chr1  | 115258748 | C    | T         | 0.03457938  | NRAS          | ENST00000369535_r73 | c.34 G>A        | p.G12S        | MISSENSE   |
| MA4_25  | Chr12 | 25398281  | C    | T         | 0.02281746  | KRAS          | ENST00000311936_r73 | c.38 G>A        | p.G13D        | MISSENSE   |
| MA9_02  | Chr8  | 142204230 | G    | A         | 0.138424043 | DENND3        | ENST00000262585_r73 | c.3495 G>A      | p.A1165A      | SILENT     |
| MA9_05  | Chr12 | 25378561  | G    | A         | 0.010122395 | KRAS          | ENST00000369535_r73 | c.35 G>A        | p.G12D        | MISSENSE   |
| MA9_05  | Chr3  | 78684959  | G    | A         | 0.013206336 | ROBO1         | ENST00000464233_r73 | c.3337 C>T      | p.Q1113*      | NONSENSE   |



Sheet1

|          |       |           |   |           |             |           |                     |                   |              |                  |
|----------|-------|-----------|---|-----------|-------------|-----------|---------------------|-------------------|--------------|------------------|
| MA9_05   | Chr3  | 165547388 | C | T         | 0.014514278 | BCHE      | ENST00000264381_r73 | c.1434 G>A        | p.L478L      | SILENT           |
| MA9_03   | Chr2  | 228563984 | G | A         | 0.048889717 | SLC19A3   | ENST00000425817_r73 | c.447 C>T         | p.A149A      | SILENT           |
| MA9_03   | Chr1  | 79002226  | C | T         | 0.105546838 | PTGFR     | ENST00000370758_r73 | c.934 C>T         | p.L312F      | MISSENSE         |
| MA9_03   | Chr12 | 25398281  | C | T         | 0.026697105 | KRAS      | ENST00000311936_r73 | c.38 G>A          | p.G13D       | MISSENSE         |
| MA9_04   | Chr2  | 189868770 | G | C         | 0.223776224 | COL3A1    | ENST00000304636_r73 | c.2724 G>C        | p.A908A      | SILENT           |
| MA9_04   | Chr12 | 104092949 | C | T         | 0.42753908  | STAB2     | ENST00000388887_r73 | c.3658 C>T        | p.R1220C     | MISSENSE         |
| MA9_04   | Chr8  | 113702206 | A | G         | 0.323759791 | CSMD3     | ENST00000343508_r73 | c.1926 T>C        | p.N642N      | SILENT           |
| MLLwt_01 | Chr17 | 7577094   | - | CCT       | 0.326332017 | TP53      | ENST00000269305_r73 | c.844 ->AGG       | p.R282Ins(R) | MISSENSE         |
| MLLwt_01 | Chr8  | 12595499  | C | T         | 0.444754464 | LONRF1    | ENST00000398246_r73 | Exon 4 5 G>A      | -            | ESSENTIAL_SPLICE |
| MLLwt_01 | Chr1  | 38341371  | G | A         | 0.417063492 | INPP5B    | ENST00000373024_r73 | c.1695 C>T        | p.D565D      | SILENT           |
| MLLwt_01 | Chr14 | 68270920  | G | A         | 0.439142317 | ZFYVE26   | ENST00000347230_r73 | c.1333 C>T        | p.L445F      | MISSENSE         |
| MLLwt_02 | Chr8  | 2820915   | C | T         | 0.692964304 | CSMD1     | ENST00000537824_r73 | c.9283 G>A        | p.V3095M     | MISSENSE         |
| MLLwt_02 | Chr9  | 5078360   | A | G         | 0.322690992 | JAK2      | ENST00000381652_r73 | c.2047 A>G        | p.R683G      | MISSENSE         |
| MLLwt_02 | Chr3  | 32933224  | G | A         | 0.391132723 | TRIM71    | ENST00000383763_r73 | c.2528 G>A        | p.R843H      | MISSENSE         |
| MLLwt_02 | Chr4  | 81865980  | G | A         | 0.251284104 | C4orf22   | ENST00000358105_r73 | c.493 G>A         | p.A165T      | MISSENSE         |
| MLLwt_02 | Chr9  | 139278036 | C | T         | 0.203371398 | SNAPC4    | ENST00000298532_r73 | c.1585 G>A        | p.G529S      | MISSENSE         |
| MLLwt_02 | Chr1  | 216462698 | G | T         | 0.180441281 | USH2A     | ENST00000307340_r73 | c.1895 C>A        | p.P632H      | MISSENSE         |
| MLLwt_03 | Chr9  | 95237025  | - | TCATCATCA | 0.026448196 | ASPN      | ENST00000375544_r73 | c.155 ->TGATGATGA | p.E52 E>VMMK | MISSENSE         |
| MLLwt_03 | Chr11 | 1266996   | T | C         | 0.258956916 | MUC5B     | ENST00000529681_r73 | c.8886 T>C        | p.R2962R     | SILENT           |
| MLLwt_03 | Chr12 | 112888162 | G | C         | 0.0860887   | PTPN11    | ENST00000392597_r73 | c.178 G>C         | p.G60R       | MISSENSE         |
| MLLwt_04 | Chr16 | 58076166  | G | A         | 0.055459184 | MMP15     | ENST00000219271_r73 | c.1196 G>A        | p.R399H      | MISSENSE         |
| MLLwt_05 | Chr3  | 10953794  | C | T         | 0.124726845 | SLC6A11   | ENST00000254488_r73 | c.911 C>T         | p.T304M      | MISSENSE         |
| MLLwt_06 | Chr7  | 4800821   | C | T         | 0.375       | FO XK1    | ENST00000328914_r73 | c.1823 C>T        | p.T608I      | MISSENSE         |
| MLLwt_06 | Chr6  | 20124710  | G | A         | 0.410250182 | MBOAT1    | ENST00000324607_r73 | c.836 C>T         | p.P279L      | MISSENSE         |
| MLLwt_06 | Chr6  | 27100393  | A | T         | 0.224532225 | HIST1H2BJ | ENST00000607124_r73 | c.137 T>A         | p.L46Q       | MISSENSE         |
| MLLwt_06 | Chr20 | 60791797  | C | G         | 0.422680412 | HRH3      | ENST00000340177_r73 | c.603 G>C         | p.T201T      | SILENT           |
| MLLwt_06 | Chr1  | 86289382  | G | T         | 0.303030303 | COL24A1   | ENST00000370571_r73 | c.3721 C>A        | p.Q1241K     | MISSENSE         |
| MLLwt_06 | Chr4  | 169433068 | G | C         | 0.095695971 | PALLD     | ENST00000261509_r73 | c.413 G>C         | p.R138P      | MISSENSE         |
| MLLwt_07 | Chr7  | 100643824 | C | T         | 0.044602273 | MUC12     | ENST00000536621_r73 | c.9980 C>T        | p.T3327M     | MISSENSE         |
| MLLwt_07 | Chr12 | 112230482 | G | A         | 0.312261781 | ALDH2     | ENST00000416293_r73 | c.838 G>A         | p.V280M      | MISSENSE         |
| MLLwt_08 | Chr16 | 737085    | C | T         | 0.379388448 | WDR24     | ENST00000293883_r73 | c.991 G>A         | p.A331T      | MISSENSE         |
| MLLwt_08 | Chr11 | 1017828   | G | A         | 0.083926755 | MUC6      | ENST00000421673_r73 | c.4973 C>T        | p.T1658M     | MISSENSE         |
| MLLwt_08 | Chr17 | 4643865   | C | T         | 0.346       | ZMYND15   | ENST00000433935_r73 | c.22 C>T          | p.R8W        | MISSENSE         |
| MLLwt_08 | Chr10 | 15719628  | G | A         | 0.388174807 | ITGA8     | ENST00000378076_r73 | c.639 C>T         | p.D213D      | SILENT           |
| MLLwt_08 | Chr6  | 38905788  | C | T         | 0.268558952 | DNAH8     | ENST00000449981_r73 | c.11602 C>T       | p.R3868*     | NONSENSE         |
| MLLwt_08 | Chr2  | 43452533  | - | AG        | 0.346       | ZFP36L2   | ENST00000282388_r73 | c.410 ->CT        | p.L137fs*51  | FRAMESHIFT       |
| MLLwt_08 | Chr20 | 62599293  | G | A         | 0.030521212 | ZNF512B   | ENST00000369888_r73 | c.11 C>T          | p.P4L        | MISSENSE         |

## Sheet1

|          |       |           |   |   |             |       |                     |            |         |          |
|----------|-------|-----------|---|---|-------------|-------|---------------------|------------|---------|----------|
| MLLwt_09 | Chr12 | 25398281  | C | T | 0.026697105 | KRAS  | ENST00000311936_r73 | c.38 G>A   | p.G13D  | MISSENSE |
| MLLwt_10 | Chr16 | 29830928  | G | A | 0.057032224 | PAGR1 | ENST00000320330_r73 | c.618 G>A  | p.S206S | SILENT   |
| MLLwt_10 | Chr1  | 156761566 | C | T | 0.178651281 | PRCC  | ENST00000271526_r73 | c.1161 C>T | p.S387S | SILENT   |
