# Supplementary material for: Unraveling the cellular origin and clinical prognostic markers of infant B-cell acute lymphoblastic leukemia using genome-wide analysis
Source: PubMed Central journal article supplement — Haematologica. 2019 Jan 24;104(6):1176–88. doi: 10.3324/haematol.2018.206375 (PMC6545849; doi:10.3324/haematol.2018.206375), 2019-06
Supplement: 2018_206375-Disclosures_and_Contributions.pdf [file 2018_206375-Disclosures_and_Contributions.pdf]

Haematologica  
HAEMATOL/2018/206375  
Version 3

Unravelling the cellular origin and clinical prognostic markers of infant  
B-cell acute lymphoblastic leukemia using genome-wide analysis

Antonio Agraz-Doblas, Clara Bueno, Rachael Bashford-Rogers,  
Anindita Roy, Pauline Schneider, Michela Bardini, Paola Ballerini,  
Gianni Cazzaniga, Thaidy Moreno, Carlos Revilla, Marta Gut, Maria G  
Valsecchi, Irene Roberts, Rob Pieters, Paola De Lorenzo, Ignacio  
Varela, Pablo Menendez, and Ronald W Stam

Disclosures: none

Contributions: A.A-D., R.B-R: designed and performed experiments, analysed data and wrote the manuscript. C.B, P.S., T.M., C.R., A.R, and M.G.V: designed and performed experiments, and analysed data. R.W.S., M.B., G.C., P.B., P.S., M.G.V, P.D.L, I.R, and R.P.: provided leukemic samples and clinical data. I.V. and P.M.: conceived the study, designed experiments, analysed data and wrote the manuscript.
